# Supplementary material for: Ligand and counteranion enabled regiodivergent C–H bond functionalization of naphthols with α-aryl-α-diazoesters
Source: PubMed Central journal article supplement — Chem Sci. 2019 May 27;10(26):6553–9. doi: 10.1039/c9sc01657k (PMC6615435; doi:10.1039/c9sc01657k), 2019-05-27

## Supporting Information

# Ligand and Counteranion Enabled Regiodivergent C-H Bond Functionalization of Naphthols with $\alpha$ -Aryl- $\alpha$ - Diazoesters

*Zhunzhun Yu, Yongfeng Li, Peichao Zhang, Lu Liu\* and Junliang Zhang\**

*Shanghai Key Laboratory of Green Chemistry and Chemical Processes, Department of Chemistry,  
East China Normal University, 3663 North Zhongshan Road, Shanghai 200062, China.*

### Content:

|                                                                                                            |           |
|------------------------------------------------------------------------------------------------------------|-----------|
| <b>1. Table S1.....</b>                                                                                    | <b>2</b>  |
| <b>2. General Information.....</b>                                                                         | <b>4</b>  |
| <b>3. General procedure for synthesis of <math>\alpha</math>-aryl-<math>\alpha</math>-diazoesters.....</b> | <b>4</b>  |
| <b>4. General procedure for the C-H bond functionalization.....</b>                                        | <b>5</b>  |
| <b>5. The transformations of products.....</b>                                                             | <b>34</b> |
| <b>6. Preliminary mechanism studies.....</b>                                                               | <b>39</b> |
| <b>7. X-ray crystal data for 3ah, 4al, 7i and 9.....</b>                                                   | <b>48</b> |
| <b>8. NMR Spectra of new compounds.....</b>                                                                | <b>48</b> |

**1. Table S1: Optimization of Reaction Conditions.**

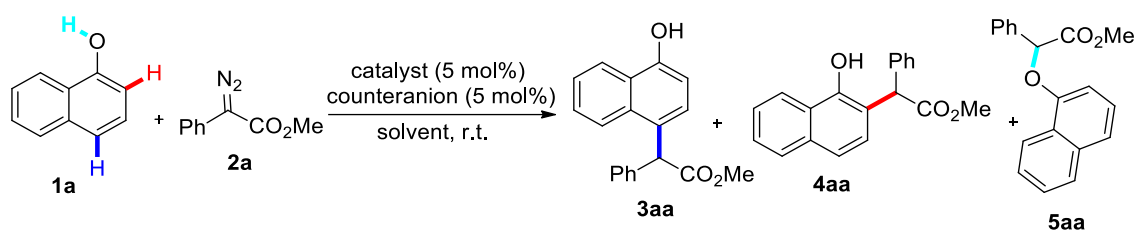

| Entry | Catalyst                                                                               | Counteranion       | Solvent                         | Yield(%) <sup>a</sup> |
|-------|----------------------------------------------------------------------------------------|--------------------|---------------------------------|-----------------------|
|       |                                                                                        |                    |                                 | <b>3aa/4aa/5aa</b>    |
| 1     | Ph <sub>3</sub> PAuCl                                                                  | AgSbF <sub>6</sub> | CH <sub>2</sub> Cl <sub>2</sub> | 57/24/0               |
| 2     | IPrAuCl                                                                                | AgSbF <sub>6</sub> | CH <sub>2</sub> Cl <sub>2</sub> | 32/43/0               |
| 3     | (2,4- <sup>t</sup> Bu <sub>2</sub> C <sub>6</sub> H <sub>3</sub> O) <sub>3</sub> PAuCl | AgSbF <sub>6</sub> | CH <sub>2</sub> Cl <sub>2</sub> | 43/15/0               |
| 4     | (C <sub>6</sub> F <sub>5</sub> ) <sub>3</sub> PAuCl                                    | AgSbF <sub>6</sub> | CH <sub>2</sub> Cl <sub>2</sub> | 14/14/0               |
| 5     | (4-CF <sub>3</sub> C <sub>6</sub> H <sub>4</sub> ) <sub>3</sub> PAuCl                  | AgSbF <sub>6</sub> | CH <sub>2</sub> Cl <sub>2</sub> | 52/18/0               |
| 6     | JohnphosAuCl                                                                           | AgSbF <sub>6</sub> | CH <sub>2</sub> Cl <sub>2</sub> | 53/19/0               |
| 7     | X-PhosAuCl                                                                             | AgSbF <sub>6</sub> | CH <sub>2</sub> Cl <sub>2</sub> | 50/31/0               |
| 8     | <sup>t</sup> BuXPhosAuCl                                                               | AgSbF <sub>6</sub> | CH <sub>2</sub> Cl <sub>2</sub> | 49/27/0               |
| 9     | PicAuCl <sub>2</sub>                                                                   | AgSbF <sub>6</sub> | CH <sub>2</sub> Cl <sub>2</sub> | NR/NR/NR              |
| 10    | JohnphosAuCl                                                                           | AgBF <sub>4</sub>  | CH <sub>2</sub> Cl <sub>2</sub> | 68/8/0                |
| 11    | JohnphosAuCl                                                                           | AgOTf              | CH <sub>2</sub> Cl <sub>2</sub> | 70/0/0                |
| 12    | JohnphosAuCl                                                                           | AgNTf <sub>2</sub> | CH <sub>2</sub> Cl <sub>2</sub> | 71/25/0               |
| 13    | JohnphosAuCl                                                                           | NaBAR <sub>F</sub> | CH <sub>2</sub> Cl <sub>2</sub> | 26/54/0               |
| 14    | JohnphosAuCl                                                                           | AgOTf              | DCE                             | 73/7/0                |
| 15    | JohnphosAuCl                                                                           | AgOTf              | Toluene                         | 67/0/0                |
| 16    | JohnphosAuCl                                                                           | AgOTf              | THF                             | 90 (87)/0/0           |
| 17    | JohnphosAuCl                                                                           | AgOTf              | CH <sub>3</sub> CN              | 54/0/0                |
| 18    | JohnphosAuCl                                                                           | AgOTf              | Ether                           | 80/0/0                |
| 19    | JohnphosAuCl                                                                           | AgOTf              | 1,4-dioxane                     | 47/21/0               |
| 20    | JohnphosAuCl                                                                           | -                  | CH <sub>2</sub> Cl <sub>2</sub> | NR/NR/NR              |
| 21    | -                                                                                      | AgOTf              | CH <sub>2</sub> Cl <sub>2</sub> | 0/0/0                 |
| 22    | SIPrAuCl                                                                               | AgSbF <sub>6</sub> | CH <sub>2</sub> Cl <sub>2</sub> | 32/48/0               |

|    |                                                                                        |                    |                                 |                      |
|----|----------------------------------------------------------------------------------------|--------------------|---------------------------------|----------------------|
| 23 | IBu <sup>t</sup> AuCl                                                                  | AgSbF <sub>6</sub> | CH <sub>2</sub> Cl <sub>2</sub> | 42/30/0              |
| 24 | IMesAuCl                                                                               | AgSbF <sub>6</sub> | CH <sub>2</sub> Cl <sub>2</sub> | 30/26/0              |
| 25 | IPrAuCl                                                                                | AgOTf              | CH <sub>2</sub> Cl <sub>2</sub> | 52/18/0              |
| 26 | IPrAuCl                                                                                | AgBF <sub>4</sub>  | CH <sub>2</sub> Cl <sub>2</sub> | 45/28/0              |
| 27 | IPrAuCl                                                                                | AgNTf <sub>2</sub> | CH <sub>2</sub> Cl <sub>2</sub> | 25/49/0              |
| 28 | IPrAuCl                                                                                | NaBAr <sub>F</sub> | CH <sub>2</sub> Cl <sub>2</sub> | 13/90(82) /0         |
| 29 | IPrAuCl                                                                                | NaBAr <sub>F</sub> | DCE                             | 28/64/0              |
| 30 | IPrAuCl                                                                                | NaBAr <sub>F</sub> | Toluene                         | 28/65/0              |
| 31 | IPrAuCl                                                                                | NaBAr <sub>F</sub> | CH <sub>3</sub> CN              | NR/NR/NR             |
| 32 | IPrAuCl                                                                                | -                  | CH <sub>2</sub> Cl <sub>2</sub> | NR/NR/NR             |
| 33 | -                                                                                      | NaBAr <sub>F</sub> | CH <sub>2</sub> Cl <sub>2</sub> | NR/NR/NR             |
| 34 | Ph <sub>3</sub> PAuCl                                                                  | AgOTf              | CH <sub>2</sub> Cl <sub>2</sub> | 66/16/0              |
| 35 | (2,4- <sup>t</sup> Bu <sub>2</sub> C <sub>6</sub> H <sub>3</sub> O) <sub>3</sub> PAuCl | AgOTf              | CH <sub>2</sub> Cl <sub>2</sub> | 60/12/0              |
| 36 | Ph <sub>3</sub> PAuCl                                                                  | NaBAr <sub>F</sub> | CH <sub>2</sub> Cl <sub>2</sub> | 42/42/0              |
| 37 | (2,4- <sup>t</sup> Bu <sub>2</sub> C <sub>6</sub> H <sub>3</sub> O) <sub>3</sub> PAuCl | NaBAr <sub>F</sub> | CH <sub>2</sub> Cl <sub>2</sub> | 19/14/0              |
| 38 | Cu(CH <sub>3</sub> CN) <sub>4</sub> PF <sub>6</sub>                                    | -                  | CH <sub>2</sub> Cl <sub>2</sub> | 0/12 <sup>b</sup> /0 |
| 39 | Cu(OTf) <sub>2</sub>                                                                   | -                  | CH <sub>2</sub> Cl <sub>2</sub> | 0/48 <sup>b</sup> /0 |
| 40 | Rh(OAc) <sub>2</sub>                                                                   | -                  | CH <sub>2</sub> Cl <sub>2</sub> | 0/54 <sup>b</sup> /9 |
| 41 | Pd(OAc) <sub>2</sub>                                                                   | -                  | CH <sub>2</sub> Cl <sub>2</sub> | NR/NR/NR             |
| 42 | (C <sub>6</sub> F <sub>5</sub> ) <sub>3</sub> B                                        | -                  | CH <sub>2</sub> Cl <sub>2</sub> | 0/24/0               |

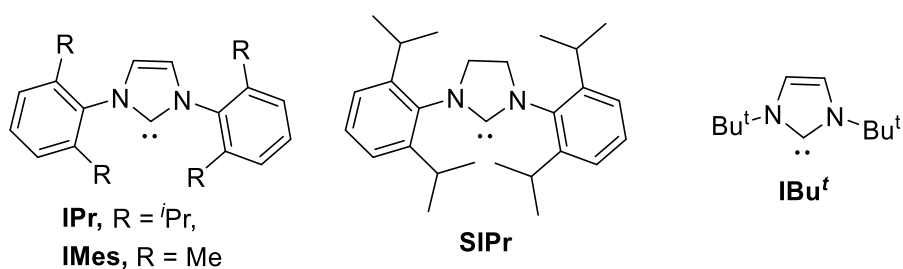

Reaction Conditions: **1a** (0.6 mmol), **2a** (0.4 mmol), catalyst (5 mol%), solvent (5mL), r.t, 15 min. <sup>a</sup>NMR yield, the number in parenthesis is isolated yield.

<sup>b</sup>Corresponding lactone was obtained.

## 2. General Information:

All air- and moisture-sensitive manipulations were carried out with standard Schlenk techniques under nitrogen or in a glove box under nitrogen.  $^1\text{H}$  NMR,  $^{13}\text{C}$  NMR spectra were measured at 400 MHz and 100 MHz in  $\text{CDCl}_3$ . Data for  $^1\text{H}$  NMR spectra are reported as follows: chemical shift (ppm, referenced to TMS; s = singlet, d = doublet, t = triplet, dd = doublet of doublets, dt = doublet of triplets, m = multiplet), coupling constant (Hz), and integration. Data for  $^{13}\text{C}$  NMR are reported in terms of chemical shift (ppm) relative to residual solvent peak ( $\text{CDCl}_3$ : 77.0 ppm). THF, Toluene, 1,4-dioxane, Ether were distilled from sodium and benzophenone prior to be used.  $\text{CH}_2\text{Cl}_2$ ,  $\text{CH}_3\text{CN}$  were distilled from  $\text{CaH}_2$  prior to be used.

## 3. General procedure for synthesis of $\alpha$ -aryl- $\alpha$ -diazoesters

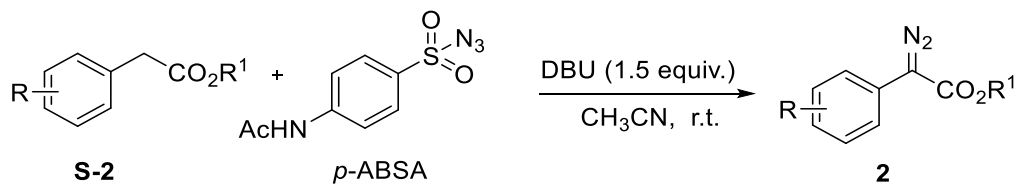

The arylacetate was dissolved in  $\text{CH}_3\text{CN}$  (10 mL/g) and *p*-ABSAs (1.5 equiv) and DBU (1.5 equiv.) was added at r.t. The reaction was stirred at r.t. for 12 h. The reaction was diluted with water extracted with ether and dried over  $\text{Na}_2\text{SO}_4$ . The reaction was concentrated and purified by silica chromatography (PE/EA = 200:1) to obtain the desired diazo compound.

#### 4. General procedure for the C-H bond functionalization of naphthalenols.

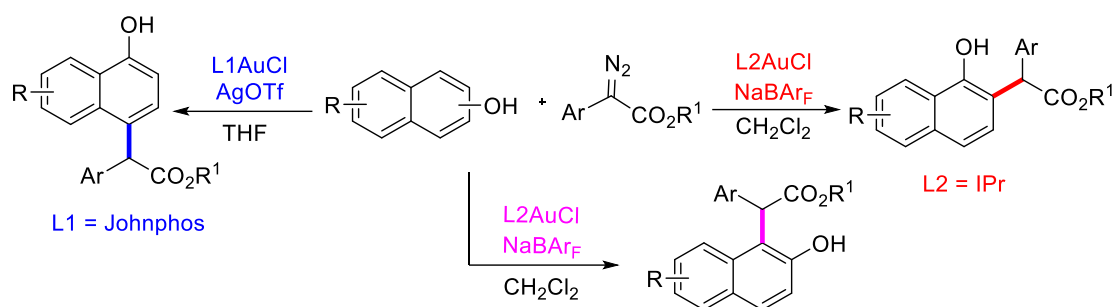

In a dried glass tube, a mixture of LAuCl (0.02 mmol), AgOTf or NaBAR<sub>F</sub> (5 mol%) in solvent (4 mL) was stirred at room temperature for 15 mins. Subsequently, naphthalenol (0.6 mmol) was added to the reaction mixture at room temperature. Then a solution of diazo compounds (0.4 mmol) in solvent (1 mL) was introduced into the reaction mixture by a syringe in 15 mins. The mixture was concentrated under reduced pressure and the residue was purified by column chromatography on silica gel (PE/EA = 10:1 to 5:1 or PE/EA = 20:1) to afford the desired product.

##### 1) The synthesis of 3aa

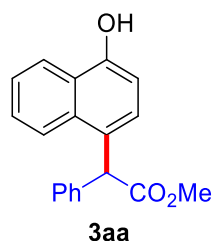

**3aa**, light red oil, (102.1 mg, 87% yield). <sup>1</sup>H-NMR (400 MHz, CDCl<sub>3</sub>) δ 8.24 (d, *J* = 7.6 Hz, 1H), 7.92 (d, *J* = 8.0 Hz, 1H), 7.45-7.55 (m, 2H), 7.27-7.38 (m, 5H), 7.05 (d, *J* = 8.0 Hz, 1H), 6.57 (d, *J* = 7.6 Hz, 1H), 6.14 (bs, 1H), 5.73 (s, 1H), 3.79 (s, 3H); <sup>13</sup>C-NMR (100 MHz, CDCl<sub>3</sub>) δ 52.58, 53.17, 107.93, 122.67, 122.89, 124.91, 124.95, 126.39, 126.56, 126.99, 127.33, 128.64, 128.91, 132.61, 138.02, 151.45, 174.14. MS(EI): *m/z* (%): 292 (M<sup>+</sup>, 17.19), 231 (100); HRMS (EI) calcd. for C<sub>19</sub>H<sub>16</sub>O<sub>3</sub>: 292.1099, found: 292.1096.

##### 2) The synthesis of 3ab

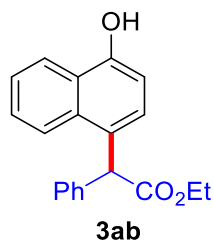

**3ab**, light red oil, (106.2 mg, 87% yield).  $^1\text{H-NMR}$  (400 MHz,  $\text{CDCl}_3$ )  $\delta$  8.23 (dd,  $J = 8.0$  Hz, 1.2 Hz, 1H), 7.94 (d,  $J = 8.0$  Hz, 1H), 7.45-7.55 (m, 2H), 7.25-7.35 (m, 5H), 7.05 (d,  $J = 8.0$  Hz, 1H), 6.54 (d,  $J = 8.0$  Hz, 1H), 6.21 (bs, 1H), 5.71 (s, 1H), 4.25-4.30 (m, 2H), 1.27 (d,  $J = 7.2$  Hz, 3H);  $^{13}\text{C-NMR}$  (100 MHz,  $\text{CDCl}_3$ )  $\delta$  14.10, 53.29, 61.50, 107.96, 122.66, 122.95, 124.85, 124.96, 126.50, 126.55, 126.87, 127.26, 128.60, 128.93, 132.64, 138.12, 151.41, 173.72. MS(EI):  $m/z$  (%): 306 ( $\text{M}^+$ , 27.00), 233 (100); HRMS (EI) calcd. for  $\text{C}_{20}\text{H}_{18}\text{O}_3$ : 306.1256, found: 306.1259.

### 3) The synthesis of 3ac

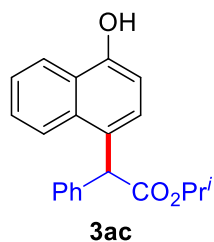

**3ac**, colorless oil, (117.1 mg, 91% yield).  $^1\text{H-NMR}$  (400 MHz,  $\text{CDCl}_3$ )  $\delta$  8.22 (d,  $J = 8.0$  Hz, 1H), 7.95 (d,  $J = 8.0$  Hz, 1H), 7.25-7.55 (m, 7H), 7.03 (d,  $J = 7.6$  Hz, 1H), 6.53 (d,  $J = 8.0$  Hz, 1H), 5.85-5.95 (m, 1H), 5.66 (s, 1H), 5.14 (hept,  $J = 6.4$  Hz, 1H), 1.26 (d,  $J = 6.4$  Hz, 3H), 1.23 (d,  $J = 6.4$  Hz, 3H);  $^{13}\text{C-NMR}$  (100 MHz,  $\text{CDCl}_3$ )  $\delta$  21.64, 53.47, 68.93, 107.98, 122.61, 123.05, 124.84, 126.51, 126.81, 127.20, 128.57, 128.94, 132.71, 138.22, 151.29. MS(EI):  $m/z$  (%): 320 ( $\text{M}^+$ , 22.79), 233 (100); HRMS (EI) calcd. for  $\text{C}_{21}\text{H}_{20}\text{O}_3$ : 320.1412, found: 320.1407.

### 4) The synthesis of 3ad

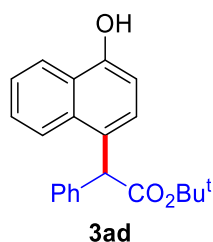

**3ad**, white solid, (99.5 mg, 74% yield).  $^1\text{H-NMR}$  (400 MHz,  $\text{CDCl}_3$ )  $\delta$  8.21 (d,  $J = 8.0$  Hz, 1H), 7.96 (d,  $J = 8.4$  Hz, 1H), 7.45-7.55 (m, 2H), 7.25-7.40 (m, 5H), 6.98 (d,  $J = 8.0$  Hz, 1H), 6.49 (d,  $J = 8.0$  Hz, 1H), 6.02 (s, 1H), 5.60 (s, 1H), 1.47 (s, 9H);  $^{13}\text{C-NMR}$  (100 MHz,  $\text{CDCl}_3$ )  $\delta$  27.95, 54.23, 81.71, 108.02, 122.60, 123.09, 124.77, 124.93, 126.47, 126.69, 127.09, 127.20, 128.54, 128.96, 132.75, 138.48, 151.18, 172.91. MS(EI):  $m/z$  (%): 334 ( $\text{M}^+$ , 12.89), 233 (100); HRMS (EI) calcd. for  $\text{C}_{22}\text{H}_{22}\text{O}_3$ : 334.1569, found: 334.1575.

### 5) The synthesis of 3ae

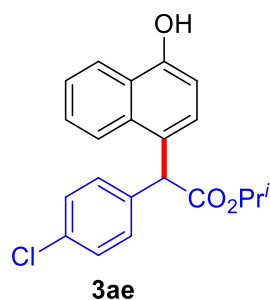

**3ae**, colorless oil, (134.5 mg, 95% yield).  $^1\text{H-NMR}$  (400 MHz,  $\text{CDCl}_3$ )  $\delta$  8.21 (d,  $J = 7.6$  Hz, 1H), 7.86 (d,  $J = 8.0$  Hz, 1H), 7.40-7.50 (m, 2H), 7.20-7.30 (m, 4H), 7.00 (d,  $J = 7.6$  Hz, 1H), 6.51 (d,  $J = 7.6$  Hz, 1H), 6.19 (s, 1H), 5.61 (s, 1H), 5.13 (hept,  $J = 6.4$  Hz, 1H), 1.23 (d,  $J = 6.4$  Hz, 3H), 1.22 (d,  $J = 6.4$  Hz, 3H);  $^{13}\text{C-NMR}$  (100 MHz,  $\text{CDCl}_3$ )  $\delta$  21.60, 21.63, 52.86, 69.21, 107.89, 122.69, 122.91, 124.96, 124.99, 126.16, 126.33, 126.92, 128.73, 130.28, 132.53, 133.12, 136.75, 151.51, 172.89. MS(EI):  $m/z$  (%): 354 ( $\text{M}^+$ , 21.99), 356 ( $[\text{M}+2]^+$ , 6.88), 267 (100); HRMS (EI) calcd. for  $\text{C}_{21}\text{H}_{19}\text{O}_3\text{Cl}$ : 354.1023, found: 354.1024.

### 6) The synthesis of 3af

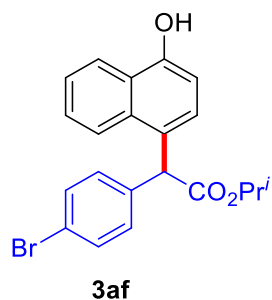

**3af**, colorless oil, (150.0 mg, 94% yield).  $^1\text{H-NMR}$  (400 MHz,  $\text{CDCl}_3$ )  $\delta$  8.20-8.25 (m, 1H), 7.87 (d,  $J = 8.0$  Hz, 1H), 7.42-7.52 (m, 4H), 7.20 (d,  $J = 8.4$  Hz, 2H), 7.02 (d,  $J = 7.6$  Hz, 1H), 6.53 (d,  $J = 8.0$  Hz, 1H), 6.10 (s, 1H), 5.60 (s, 1H), 5.14 (hept,  $J = 6.4$  Hz, 1H), 1.25 (d,  $J = 6.4$  Hz, 3H), 1.24 (d,  $J = 6.4$  Hz, 3H);  $^{13}\text{C-NMR}$  (100 MHz,  $\text{CDCl}_3$ )  $\delta$  21.61, 21.64, 52.93, 69.23, 107.90, 121.28, 122.69, 122.90, 124.98, 126.11, 126.35, 126.94, 130.64, 131.68, 132.52, 137.27, 151.48, 172.80. MS(EI):  $m/z$  (%): 398 ( $\text{M}^+$ , 21.50), 400 ( $[\text{M}+2]^+$ , 21.42), 231 (100); HRMS (EI) calcd. for  $\text{C}_{21}\text{H}_{19}\text{O}_3\text{Br}$ : 398.0518, found: 398.0520.

#### 7) The synthesis of **3ag**

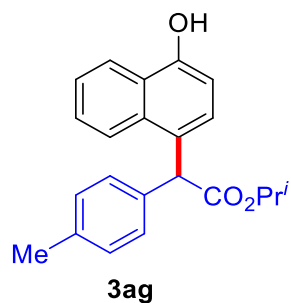

**3ag**, white solid, (112.9 mg, 84% yield).  $^1\text{H-NMR}$  (400 MHz,  $\text{CDCl}_3$ )  $\delta$  8.21 (d,  $J = 8.4$  Hz, 1H), 7.95 (d,  $J = 8.4$  Hz, 1H), 7.40-7.55 (m, 2H), 7.23 (d,  $J = 8.0$  Hz, 2H), 7.16 (d,  $J = 8.0$  Hz, 2H), 7.00 (d,  $J = 8.0$  Hz, 1H), 6.47 (d,  $J = 8.0$  Hz, 1H), 6.21 (s, 1H), 5.64 (s, 1H), 5.15 (hept,  $J = 6.4$  Hz, 1H), 2.35 (s, 3H), 1.27 (d,  $J = 6.4$  Hz, 3H), 1.24 (d,  $J = 6.4$  Hz, 3H);  $^{13}\text{C-NMR}$  (100 MHz,  $\text{CDCl}_3$ )  $\delta$  21.05, 21.63, 21.65, 53.11, 68.92, 108.02, 122.63, 123.00, 124.75, 124.95, 126.46, 126.73, 126.83, 128.80, 129.30, 132.68, 135.10, 136.83, 151.27, 173.48. MS(EI):  $m/z$  (%): 334 ( $\text{M}^+$ , 20.02), 247 (100); HRMS (EI) calcd. for  $\text{C}_{22}\text{H}_{22}\text{O}_3$ : 334.1569, found: 334.1573.



### 8) The synthesis of 3ao

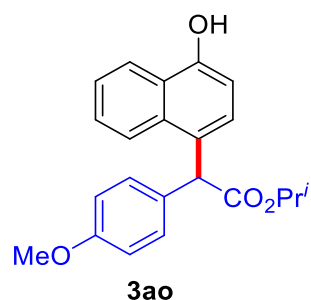

**3ao**, yellow oil, (112.9 mg, 84% yield).  $^1\text{H-NMR}$  (500 MHz,  $\text{CDCl}_3$ )  $\delta$  8.20 (d,  $J = 8.0$  Hz, 1H), 7.91 (d,  $J = 8.0$  Hz, 1H), 7.40-7.50 (m, 2H), 7.24 (d,  $J = 8.5$  Hz, 2H), 7.00 (d,  $J = 7.5$  Hz, 1H), 6.86 (d,  $J = 8.5$  Hz, 2H), 6.50 (d,  $J = 8.0$  Hz, 1H), 5.58 (s, 1H), 5.12 (hept,  $J = 6.0$  Hz, 1H), 3.77 (s, 3H), 1.24 (d,  $J = 6.0$  Hz, 3H), 1.21 (d,  $J = 6.0$  Hz, 3H);  $^{13}\text{C-NMR}$  (100 MHz,  $\text{CDCl}_3$ )  $\delta$  21.64, 52.68, 55.20, 68.88, 107.92, 113.96, 122.64, 123.00, 124.77, 124.94, 126.30, 126.73, 126.88, 129.97, 130.19, 132.61, 151.31, 158.61, 173.52. HRMS (EI) calcd. for  $[\text{C}_{22}\text{H}_{22}\text{O}_4 + \text{Na}]^+$ : 373.1410, found: 373.1401.

### 9) The synthesis of 3ap

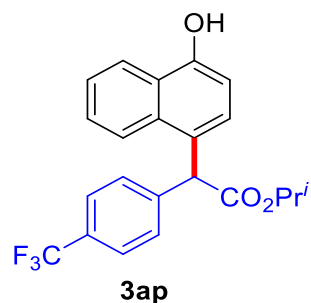

**3ap**, yellow oil, (125.9 mg, 81% yield).  $^1\text{H-NMR}$  (500 MHz,  $\text{CDCl}_3$ )  $\delta$  8.25 (d,  $J = 8.5$  Hz, 1H), 7.89 (d,  $J = 8.5$  Hz, 1H), 7.40-7.65 (m, 6H), 7.01 (d,  $J = 8.0$  Hz, 1H), 6.60-6.70 (m, 1H), 6.50 (d,  $J = 8.0$  Hz, 1H), 5.74 (s, 1H), 5.19 (hept,  $J = 6.5$  Hz, 1H), 1.28 (d,  $J = 6.5$  Hz, 3H), 1.27 (d,  $J = 6.5$  Hz, 3H);  $^{13}\text{C-NMR}$  (125 MHz,  $\text{CDCl}_3$ )  $\delta$  21.54, 21.59, 53.25, 69.58, 107.87, 122.74, 122.80, 124.08 (q,  $J = 268.8$  Hz, 1C), 124.99, 125.05, 125.41 (q,  $J = 3.8$  Hz, 1C), 125.51 (q,  $J = 3.8$  Hz, 1C), 126.48, 126.73, 129.29, 129.47 (q,  $J = 32.5$  Hz, 1C), 132.47, 142.20, 151.77, 172.91. HRMS (ESI) calcd. for  $[\text{C}_{22}\text{H}_{19}\text{F}_3\text{O}_3 + \text{Na}]^+$ : 411.1178, found: 411.1177.

### 10) The synthesis of 3ah

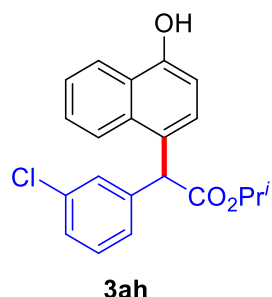

**3ah**, white solid, (120.3 mg, 85% yield).  $^1\text{H-NMR}$  (400 MHz,  $\text{CDCl}_3$ )  $\delta$  8.20-8.25 (m, 1H), 7.87 (d,  $J = 7.6$  Hz, 1H), 7.45-7.55 (m, 2H), 7.15-7.35 (m, 4H), 7.05 (d,  $J = 7.6$  Hz, 1H), 6.57 (d,  $J = 7.6$  Hz, 1H), 5.83 (s, 1H), 5.61 (s, 1H), 5.13 (hept,  $J = 6.4$  Hz, 1H), 1.24 (d,  $J = 6.4$  Hz, 6H);  $^{13}\text{C-NMR}$  (100 MHz,  $\text{CDCl}_3$ )  $\delta$  21.60, 21.66, 53.06, 69.22, 107.95, 122.67, 122.92, 124.95, 125.03, 126.08, 126.38, 127.01, 127.13, 127.50, 129.08, 129.76, 132.56, 134.43, 140.29, 151.43, 172.52. MS(EI):  $m/z$  (%): 354 ( $\text{M}^+$ , 23.69), 356 ( $[\text{M}+2]^+$ , 8.41), 267 (100); HRMS (EI) calcd. for  $\text{C}_{21}\text{H}_{19}\text{O}_3\text{Cl}$ : 354.1023, found: 354.1028.

### 11) The synthesis of 3ai

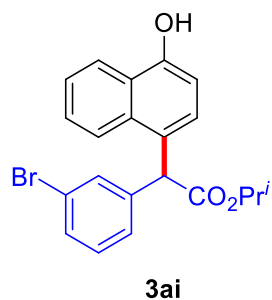

**3ai**, white solid, (136.1 mg, 85% yield).  $^1\text{H-NMR}$  (400 MHz,  $\text{CDCl}_3$ )  $\delta$  8.22-8.26 (m, 1H), 7.87 (d,  $J = 8.0$  Hz, 1H), 7.45-7.55 (m, 3H), 7.40 (d,  $J = 8.0$  Hz, 1H), 7.16-7.26 (m, 2H), 7.07 (d,  $J = 8.0$  Hz, 1H), 6.60 (d,  $J = 8.0$  Hz, 1H), 5.87 (bs, 1H), 5.60 (s, 1H), 5.12 (hept,  $J = 6.4$  Hz, 1H), 1.23 (d,  $J = 6.4$  Hz, 6H).  $^{13}\text{C-NMR}$  (100 MHz,  $\text{CDCl}_3$ )  $\delta$  21.60, 21.67, 53.03, 69.14, 107.96, 122.66, 122.98, 124.99, 125.06, 126.19, 126.40, 127.03, 127.59, 130.05, 130.41, 131.96, 132.60, 140.67, 151.45, 172.32. MS(EI):  $m/z$  (%): 398 ( $\text{M}^+$ , 17.19), 400 ( $[\text{M}+2]^+$ , 16.89), 231 (100); HRMS (EI) calcd. for

C<sub>21</sub>H<sub>19</sub>O<sub>3</sub>Br: 398.0518, found: 398.0521.

### 12) The synthesis of 3aj

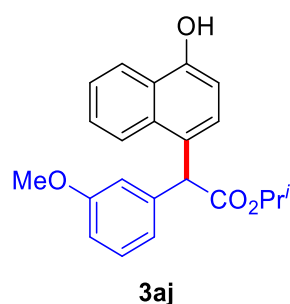

**3aj**, white solid, (122.6 mg, 88% yield). <sup>1</sup>H-NMR (400 MHz, CDCl<sub>3</sub>) δ 8.19 (d, *J* = 8.0 Hz, 1H), 7.91 (d, *J* = 8.4 Hz, 1H), 7.40-7.50 (m, 2H), 7.21-7.25 (m, 1H), 6.99 (d, *J* = 8.0 Hz, 1H), 6.85-6.95 (m, 2H), 6.81 (dd, *J* = 8.4 Hz, 2.4 Hz, 1H), 6.45 (d, *J* = 8.0 Hz, 1H), 6.22 (s, 1H), 5.61 (s, 1H), 5.12 (hept, *J* = 6.4 Hz, 1H), 3.74 (s, 3H), 1.24 (d, *J* = 6.4 Hz, 3H), 1.21 (d, *J* = 6.4 Hz, 3H); <sup>13</sup>C-NMR (100 MHz, CDCl<sub>3</sub>) δ 21.63, 21.65, 53.44, 55.16, 69.01, 107.97, 112.59, 114.86, 121.43, 122.66, 122.92, 124.77, 124.93, 126.43, 126.52, 126.77, 129.53, 132.67, 139.67, 151.38, 159.67, 173.13. MS(EI): *m/z* (%): 350 (M<sup>+</sup>, 23.36), 263 (100); HRMS (EI) calcd. for C<sub>22</sub>H<sub>22</sub>O<sub>4</sub>: 350.1518, found: 350.1524.

### 13) The synthesis of 3ak

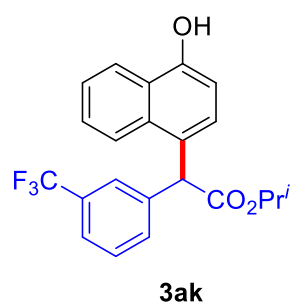

**3ak**, colorless oil, (136.5 mg, 88% yield). <sup>1</sup>H-NMR (400 MHz, CDCl<sub>3</sub>) δ 8.24 (d, *J* = 8.0 Hz, 1H), 7.90 (d, *J* = 8.0 Hz, 1H), 7.64 (s, 1H), 7.40-7.58 (m, 5H), 7.02 (dd, *J* = 8.0 Hz, 5.2 Hz, 1H), 6.52-6.58 (m, 1H), 6.15 (bs, 1H), 5.72 (s, 1H), 5.16 (hept, *J* = 6.0 Hz, 1H), 1.25 (d, *J* = 6.0 Hz, 3H), 1.24 (d, *J* = 6.0 Hz, 3H); <sup>13</sup>C-NMR (100 MHz, CDCl<sub>3</sub>) δ 172.62, 151.61, 139.25, 132.53, 132.34, 130.88 (q, *J* = 32 Hz, 1C), 129.02, 127.06,

126.47, 125.84, 125.70 (q,  $J = 4$  Hz, 1C), 125.05, 125.01, 124.19 (q,  $J = 3$  Hz, 1C), 124.04 (q,  $J = 271$  Hz, 1C), 122.80, 122.75, 107.93, 69.42, 53.20, 21.59, 21.56. MS(EI):  $m/z$  (%): 388 ( $M^+$ , 20.94), 301 (100); HRMS (EI) calcd. for  $C_{22}H_{19}O_3F_3$ : 388.1286, found: 388.1280.

#### 14) The synthesis of 3al

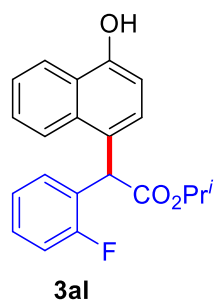

**3al**, white solid, (122.7 mg, 91% yield).  $^1H$ -NMR (400 MHz,  $CDCl_3$ )  $\delta$  8.20-8.25 (m, 1H), 7.85-7.90 (m, 1H), 7.45-7.52 (m, 2H), 7.20-7.28 (m, 1H), 6.95-7.15 (m, 4H), 6.60-6.68 (m, 1H), 5.90-6.10 (m, 1H), 5.93 (s, 1H), 5.16 (m, 1H), 1.26 (d,  $J = 6.0$  Hz, 3H), 1.24 (d,  $J = 6.0$  Hz, 3H);  $^{13}C$ -NMR (100 MHz,  $CDCl_3$ )  $\delta$  21.53, 21.62, 46.30 (d,  $J = 3.0$  Hz, 1C), 69.28, 107.94, 115.16 (d,  $J = 22$  Hz, 1C), 122.81 (d,  $J = 32$  Hz, 1C), 124.06, 124.09, 124.95, 125.00 (d,  $J = 8$  Hz, 1C), 125.75 (d,  $J = 14$  Hz, 1C), 126.16, 126.93, 128.98 (d,  $J = 8$  Hz, 1C), 130.29, 130.32, 132.62, 151.66, 160.54 (d,  $J = 45$  Hz, 1C), 172.76. MS(EI):  $m/z$  (%): 338 ( $M^+$ , 23.17), 251 (100); HRMS (EI) calcd. for  $C_{21}H_{19}O_3F$ : 338.1318, found: 338.1323.

#### 15) The synthesis of 3am

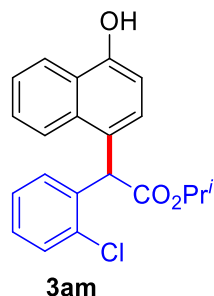

**3am**, white solid, (105.6 mg, 75% yield).  $^1H$ -NMR (400 MHz,  $CDCl_3$ )  $\delta$  8.20-8.25 (m, 1H), 7.70-7.80 (m, 1H), 7.40-7.50 (m, 3H), 7.19 (dd  $J = 7.6$  Hz, 1.6 Hz, 1H), 7.07-

7.13 (m, 2H), 6.98-7.03 (m, 1H) 6.65-6.75 (m, 1H), 6.03 (s, 1H), 5.60-5.90 (m, 1H), 5.18 (hept,  $J = 6.4$  Hz, 1H), 1.28 (d,  $J = 6.4$  Hz, 3H), 1.24 (d,  $J = 6.4$  Hz, 3H);  $^{13}\text{C}$ -NMR (100 MHz,  $\text{CDCl}_3$ )  $\delta$  21.56, 21.69, 50.80, 69.27, 107.91, 122.61, 123.14, 125.01, 125.13, 125.18, 126.12, 126.87, 126.99, 128.58, 129.42, 130.32, 132.62, 134.20, 136.43, 151.66, 172.75. MS(EI):  $m/z$  (%): 354 ( $\text{M}^+$ , 26.77), 356 ( $[\text{M}+2]^+$ , 8.84), 267 (100); HRMS (EI) calcd. for  $\text{C}_{21}\text{H}_{19}\text{O}_3\text{Cl}$ : 354.1023, found: 354.1023.

### 16) The synthesis of 3an

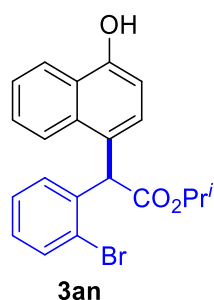

**3an**, white solid, (115.0 mg, 72% yield).  $^1\text{H}$ -NMR (400 MHz,  $\text{CDCl}_3$ )  $\delta$  8.17-8.23 (m, 1H), 7.68-7.74 (m, 1H), 7.60 (dd,  $J = 7.6$  Hz, 1.6 Hz, 1H), 7.40-7.46 (m, 2H), 7.00-7.15 (m, 4H), 6.64 (d,  $J = 8.0$  Hz, 1H), 6.24 (s, 1H), 6.02 (s, 1H), 5.20 (hept,  $J = 6.4$  Hz, 1H), 1.30 (d,  $J = 6.4$  Hz, 3H), 1.25 (d,  $J = 6.4$  Hz, 3H);  $^{13}\text{C}$ -NMR (100 MHz,  $\text{CDCl}_3$ )  $\delta$  21.57, 21.73, 53.49, 69.21, 107.88, 122.60, 123.23, 125.01, 125.05, 125.14, 125.45, 126.10, 127.00, 127.49, 128.83, 130.53, 132.62, 132.78, 138.15, 151.67, 172.56. MS(EI):  $m/z$  (%): 398 ( $\text{M}^+$ , 26.76), 400 ( $[\text{M}+2]^+$ , 27.02), 231 (100); HRMS (EI) calcd. for  $\text{C}_{21}\text{H}_{19}\text{O}_3\text{Br}$ : 398.0518, found: 398.0521.

### 17) The synthesis of 3ao

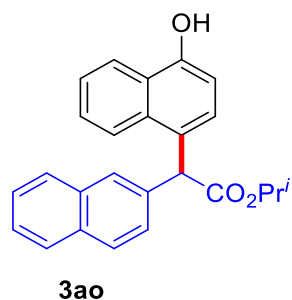

**3ao**, white solid, (146.2 mg, 99% yield).  $^1\text{H}$ -NMR (400 MHz,  $\text{CDCl}_3$ )  $\delta$  8.20-8.25 (m,

1H), 8.00 (d,  $J = 8.4$  Hz, 1H), 7.75-7.85 (m, 4H), 7.40-7.50 (m, 5H), 7.00-7.05 (m, 1H), 6.45-6.55 (m, 1H), 6.03 (bs, 1H), 5.83 (s, 1H), 5.19 (hept,  $J = 6.4$  Hz, 1H), 1.29 (d,  $J = 6.4$  Hz, 3H), 1.25 (d,  $J = 6.4$  Hz, 3H);  $^{13}\text{C}$ -NMR (100 MHz,  $\text{CDCl}_3$ )  $\delta$  21.64, 21.65, 53.61, 69.17, 108.03, 122.70, 122.90, 124.78, 124.99, 125.92, 126.10, 126.38, 126.79, 126.82, 127.19, 127.55, 127.58, 127.93, 128.25, 132.55, 132.69, 133.38, 135.60, 151.46, 173.43. MS(EI):  $m/z$  (%): 370 ( $\text{M}^+$ , 23.62), 283 (100); HRMS (EI) calcd. for  $\text{C}_{25}\text{H}_{22}\text{O}_3$ : 370.1569, found: 370.1571

### 18) The synthesis of 3ba

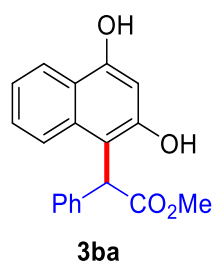

**3ba**, colorless oil, (71.5 mg, 58% yield).  $^1\text{H}$ -NMR (400 MHz,  $\text{CD}_3\text{OD}$ )  $\delta$  8.11 (dd,  $J = 8.4$  Hz, 0.8 Hz, 1H), 7.67 (d,  $J = 8.8$  Hz, 1H), 7.26-7.33 (m, 3H), 7.11-7.23 (m, 4H), 6.63 (s, 1H), 5.65 (s, 1H), 3.65 (s, 3H), 2.12 (s, 2H);  $^{13}\text{C}$ -NMR (100 MHz,  $\text{CDCl}_3$ )  $\delta$  30.66, 52.54, 101.28, 110.19, 122.23, 122.31, 123.59, 123.74, 127.50, 127.78, 128.90, 130.38, 135.31, 140.27, 154.26, 155.25, 177.27. MS(EI):  $m/z$  (%): 308 ( $\text{M}^+$ , 3.12), 247 (100); HRMS (EI) calcd. for  $\text{C}_{19}\text{H}_{16}\text{O}_4$ : 308.1049, found: 308.1047.

### 19) The synthesis of 3ca

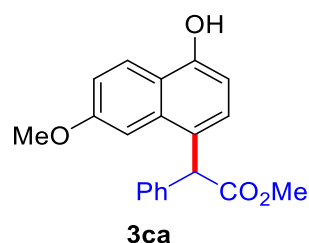

**3ca**, colorless oil, (120.3 mg, 93% yield).  $^1\text{H}$ -NMR (400 MHz,  $\text{CDCl}_3$ )  $\delta$  8.14 (d,  $J = 9.2$  Hz, 1H), 7.25-7.38 (m, 5H), 7.17 (d,  $J = 2.4$  Hz, 1H), 7.12 (dd,  $J = 9.2$  Hz, 2.4 Hz, 1H), 7.03 (d,  $J = 8.0$  Hz, 1H), 6.48 (d,  $J = 7.6$  Hz, 1H), 5.93 (bs, 1H), 5.60 (s, 1H), 3.83 (s, 3H), 3.79 (s, 3H);  $^{13}\text{C}$ -NMR (100 MHz,  $\text{CDCl}_3$ )  $\delta$  52.49, 53.74, 55.13, 102.35,

106.03, 116.95, 120.03, 124.38, 125.49, 127.21, 127.34, 128.63, 128.94, 134.06, 137.89, 151.55, 158.41, 173.89. MS(EI):  $m/z$  (%): 322 ( $M^+$ , 6.61), 195 (100); HRMS (EI) calcd. for  $C_{20}H_{18}O_4$ : 322.1205, found: 322.1207.

## 20) The synthesis of 3da

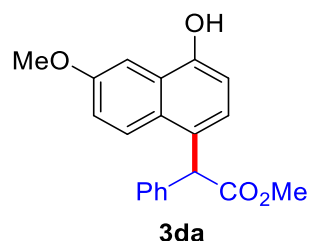

**3da**, colorless oil, (124.6 mg, 97% yield).  $^1H$ -NMR (400 MHz,  $CDCl_3$ )  $\delta$  7.82 (d,  $J = 9.2$  Hz, 1H), 7.50 (d,  $J = 2.8$  Hz, 1H), 7.25-7.38 (m, 5H), 7.16 (dd,  $J = 9.2$  Hz, 2.4 Hz, 1H), 6.91 (d,  $J = 8.0$  Hz, 1H), 6.54 (d,  $J = 8.0$  Hz, 1H), 6.32 (s, 1H), 5.70 (s, 1H), 3.90 (s, 3H), 3.80 (s, 3H);  $^{13}C$ -NMR (100 MHz,  $CDCl_3$ )  $\delta$  52.61, 53.31, 55.28, 101.06, 108.51, 119.42, 124.07, 124.61, 126.08, 126.33, 127.30, 127.99, 128.61, 128.88, 138.00, 150.52, 156.87, 174.30. MS(EI):  $m/z$  (%): 322 ( $M^+$ , 39.31), 84 (100); HRMS (EI) calcd. for  $C_{20}H_{18}O_4$ : 322.1205, found: 322.1210.

## 21) The synthesis of 3ea

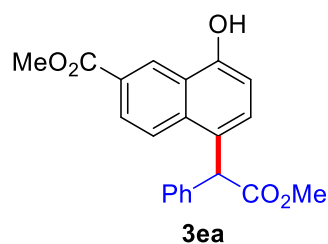

**3ea**, colorless oil, (112.4 mg, 80% yield).  $^1H$ -NMR (400 MHz,  $CDCl_3$ )  $\delta$  8.98 (s, 1H), 8.06 (d,  $J = 8.8$  Hz, 1H), 7.92 (d,  $J = 8.8$  Hz, 1H), 7.25-7.40 (m, 5H), 7.13 (d,  $J = 8.0$  Hz, 1H), 6.97 (s, 1H), 6.66 (d,  $J = 8.0$  Hz, 1H), 5.71 (s, 1H), 3.97 (s, 3H), 3.80 (s, 3H);  $^{13}C$ -NMR (100 MHz,  $CDCl_3$ )  $\delta$  52.29, 52.72, 53.11, 108.80, 123.13, 124.29, 125.99, 126.10, 126.27, 127.48, 128.75, 128.87, 129.41, 134.66, 137.58, 152.90, 167.48, 174.09. MS(EI):  $m/z$  (%): 350 ( $M^+$ , 32.26), 43 (100); HRMS (EI) calcd. for  $C_{21}H_{18}O_5$ : 350.1154, found: 350.1156.

## 22) The synthesis of 3fa

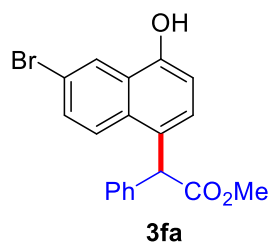

**3fa**, colorless oil, (130.1 mg, 88% yield).  $^1\text{H-NMR}$  (400 MHz,  $\text{CDCl}_3$ )  $\delta$  8.34 (d,  $J = 2.0$  Hz, 1H), 7.74 (d,  $J = 8.8$  Hz, 1H), 7.55 (dd,  $J = 8.8$  Hz, 2.0 Hz, 1H), 7.28-7.38 (m, 5H), 6.99 (d,  $J = 8.0$  Hz, 1H), 6.50 (d,  $J = 8.0$  Hz, 1H), 6.14 (s, 1H), 5.65 (s, 1H), 3.80 (s, 3H);  $^{13}\text{C-NMR}$  (100 MHz,  $\text{CDCl}_3$ )  $\delta$  52.78, 53.18, 108.96, 119.22, 124.67, 125.27, 126.14, 126.43, 127.04, 127.52, 128.76, 128.85, 130.24, 131.02, 137.49, 150.57, 174.15. MS(EI):  $m/z$  (%): 370 ( $\text{M}^+$ , 34.87), 372 ( $[\text{M}+2]^+$ , 35.18), 311 (100); HRMS (EI) calcd. for  $\text{C}_{19}\text{H}_{15}\text{O}_3\text{Br}$ : 370.0205, found: 370.0202.

## 23) The synthesis of 3ga

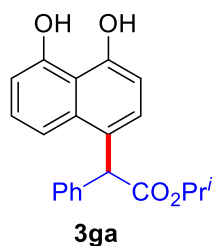

**3ga**, colorless oil, (70.2 mg, 52% yield).  $^1\text{H-NMR}$  (400 MHz,  $\text{CDCl}_3$ )  $\delta$  7.20-7.40 (m, 8H), 6.81 (d,  $J = 8.0$  Hz, 1H), 6.65 (d,  $J = 7.6$  Hz, 1H), 6.41 (d,  $J = 8.0$  Hz, 1H), 5.56 (s, 1H), 5.17 (hept,  $J = 6.0$  Hz, 1H), 1.31 (d,  $J = 6.0$  Hz, 3H), 1.24 (d,  $J = 6.0$  Hz, 3H);  $^{13}\text{C-NMR}$  (100 MHz,  $\text{CDCl}_3$ )  $\delta$  21.52, 21.67, 54.15, 69.61, 108.21, 109.53, 114.70, 114.94, 125.83, 127.39, 127.42, 127.64, 128.72, 128.96, 134.74, 137.53, 153.16, 154.26, 174.60. MS(EI):  $m/z$  (%): 336 ( $\text{M}^+$ , 1.62), 84 (100); HRMS (EI) calcd. for  $\text{C}_{21}\text{H}_{20}\text{O}_4$ : 336.1362, found: 336.1369.

## 24) The synthesis of 3ha



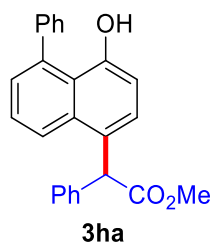

**3ha**, colorless oil, (130.2 mg, 88% yield).  $^1\text{H-NMR}$  (400 MHz,  $\text{CDCl}_3$ )  $\delta$  8.03 (d,  $J = 8.4$  Hz, 1H), 7.45-7.56 (m, 6H), 7.25-7.40 (m, 6H), 7.23 (dd,  $J = 7.2$  Hz, 1.2 Hz, 1H), 6.88 (d,  $J = 8.0$  Hz, 1H), 5.78 (s, 1H), 5.49 (s, 1H), 3.80 (s, 3H);  $^{13}\text{C-NMR}$  (100 MHz,  $\text{CDCl}_3$ )  $\delta$  52.46, 53.77, 111.19, 121.82, 123.68, 125.47, 126.69, 127.35, 127.72, 128.50, 128.60, 128.65, 128.94, 129.35, 129.40, 133.45, 137.02, 138.12, 141.23, 152.83, 173.56. MS(EI):  $m/z$  (%): 368 ( $\text{M}^+$ , 38.32), 309 (100); HRMS (EI) calcd. for  $\text{C}_{25}\text{H}_{20}\text{O}_3$ : 368.1412, found: 368.1411.

## 25) The synthesis of 3ia

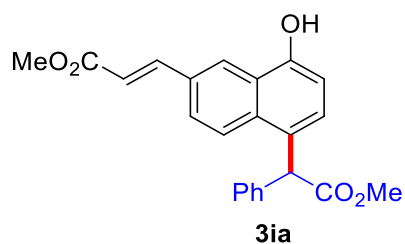

**3ia**, yellow solid, (136.6 mg, 91% yield).  $^1\text{H-NMR}$  (400 MHz, Acetone- $d_6$ )  $\delta$  9.40 (s, 1H), 8.48 (s, 1H), 8.03 (d,  $J = 8.8$  Hz, 1H), 7.70-7.80 (m, 2H), 7.25-7.40 (m, 6H), 6.95 (d,  $J = 7.6$  Hz, 1H), 6.64 (d,  $J = 16.0$  Hz, 1H), 5.79 (s, 1H), 3.77 (s, 3H), 3.72 (s, 3H);  $^{13}\text{C-NMR}$  (100 MHz, Acetone- $d_6$ )  $\delta$  51.76, 52.52, 53.55, 109.28, 118.73, 125.15, 126.17, 127.02, 127.98, 129.04, 129.30, 129.84, 131.57, 134.33, 139.68, 145.31, 154.37, 167.57, 173.79. HRMS (ESI) calcd. for  $\text{C}_{23}\text{H}_{21}\text{O}_5$ ,  $[\text{M}+1]^+$ : 377.1384, found: 377.1389.

## 26) The synthesis of 3ja

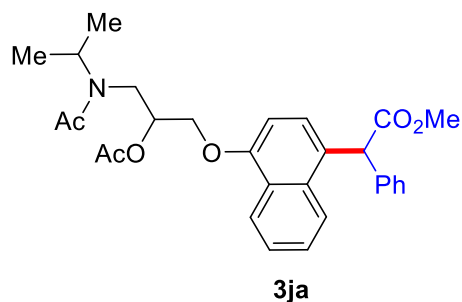

**3ja**, colorless oil, (184.2 mg, 94% yield, d.r. = 3:1).  $^1\text{H-NMR}$  (400 MHz,  $\text{CDCl}_3$ )  $\delta$  8.25-8.35 (m, 1H), 7.85-8.00 (m, 1H), 7.45-7.60 (m, 2H), 7.20-7.40 (m, 6H), 6.70-6.80 (m, 1H), [5.72 (s, 0.27), 5.70 (s, 0.73)], [5.60-5.65 (m, 0.73), 5.45-5.55 (s, 0.27)], [4.45-4.55 (m, 0.27), 4.00-4.10 (s, 0.73)], 4.20-4.35 (m, 2H), [3.80-3.90 (m, 0.73), 3.60-3.70 (s, 0.27)], [3.80-3.90 (m, 0.27), 3.35-3.45 (s, 0.73)], 3.75 (s, 3H), [2.24 (s, 0.81H), 2.16 (s, 2.19)], [2.11 (s, 0.81H), 2.08 (s, 2.19)], 1.20-1.35 (m, 6H);  $^{13}\text{C-NMR}$  (100 MHz,  $\text{CDCl}_3$ )  $\delta$  [20.09, 20.86], [20.51, 21.00], 21.61, [21.95, 22.63], [41.33, 45.42], [47.21, 49.40], 52.27, 53.10, [66.91, 68.33], [70.79, 71.44], 104.17, [122.17, 122.58], [122.90, 123.07], [125.07, 125.36], [125.74, 125.93], [126.20, 126.33], [126.83, 126.93], [127.18, 127.27], [128.49, 128.54], 128.79, [132.38, 132.47], 138.06, [153.33, 153.88], [170.05, 170.38], 171.21, [173.24, 173.34]. MS(EI):  $m/z$  (%): 491 ( $\text{M}^+$ , 0.25), 200 (100); HRMS (EI) calcd. for  $\text{C}_{29}\text{H}_{33}\text{NO}_6$ : 491.2308, found: 491.2303.

## 27) The synthesis of 4aa

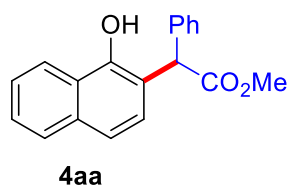

**4aa**, colorless oil, (95.6 mg, 82% yield).  $^1\text{H-NMR}$  (400 MHz,  $\text{CDCl}_3$ )  $\delta$  8.77 (s, 1H), 8.25-8.35 (m, 1H), 7.70-7.80 (m, 1H), 7.35-7.50 (m, 3H), 7.15-7.30 (m, 6H), 5.21 (s, 1H), 3.84 (s, 3H);  $^{13}\text{C-NMR}$  (100 MHz,  $\text{CDCl}_3$ )  $\delta$  53.26, 55.86, 116.04, 120.28, 122.55, 125.39, 126.32, 126.61, 127.23, 127.52, 128.74, 129.03, 134.42, 136.62, 151.35, 176.55. MS(EI):  $m/z$  (%): 292 ( $\text{M}^+$ , 15.46), 231 (100); HRMS (EI) calcd. for  $\text{C}_{19}\text{H}_{16}\text{O}_3$ : 292.1099, found: 292.1108.

### 28) The synthesis of 4ab

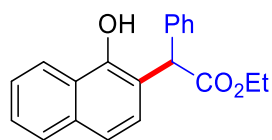

**4ab**

**4ab**, colorless oil, (105.8 mg, 87% yield).  $^1\text{H-NMR}$  (400 MHz,  $\text{CDCl}_3$ )  $\delta$  9.04 (s, 1H), 8.25-8.35 (m, 1H), 7.70-7.80 (m, 1H), 7.35-7.50 (m, 3H), 7.15-7.30 (m, 6H), 5.17 (s, 1H), 4.20-4.40 (m, 2H), 1.33 (t,  $J = 7.2$  Hz, 3H);  $^{13}\text{C-NMR}$  (100 MHz,  $\text{CDCl}_3$ )  $\delta$  14.04, 56.29, 62.59, 115.96, 120.16, 122.69, 125.33, 126.41, 126.59, 127.18, 127.44, 127.47, 128.71, 129.20, 134.44, 136.75, 151.55, 176.25. MS(EI):  $m/z$  (%): 306 ( $\text{M}^+$ , 14.98), 231 (100); HRMS (EI) calcd. for  $\text{C}_{20}\text{H}_{18}\text{O}_3$ : 306.1256, found: 306.1262.

### 29) The synthesis of 4ac

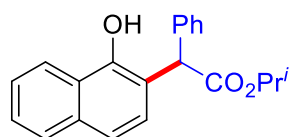

**4ac**

**4ac**, colorless oil, (117.2 mg, 91% yield).  $^1\text{H-NMR}$  (400 MHz,  $\text{CDCl}_3$ )  $\delta$  9.26 (s, 1H), 8.30-8.40 (m, 1H), 7.70-7.80 (m, 1H), 7.35-7.50 (m, 3H), 7.15-7.30 (m, 6H), 5.15 (hept,  $J = 6.4$  Hz, 1H), 5.12 (s, 1H), 1.35 (d,  $J = 6.4$  Hz, 3H), 1.27 (d,  $J = 6.4$  Hz, 3H);  $^{13}\text{C-NMR}$  (100 MHz,  $\text{CDCl}_3$ )  $\delta$  21.59, 21.69, 56.68, 70.60, 115.89, 120.07, 122.78, 125.28, 126.48, 126.57, 127.15, 127.36, 127.42, 128.69, 129.34, 134.45, 136.87, 151.69, 175.88. MS(EI):  $m/z$  (%): 320 ( $\text{M}^+$ , 15.59), 231 (100); HRMS (EI) calcd. for  $\text{C}_{21}\text{H}_{20}\text{O}_3$ : 320.1412, found: 320.1415.

### 30) The synthesis of 4ad

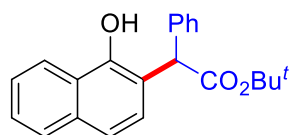

**4ad**

**4ad**, colorless oil, (120.7 mg, 90% yield).  $^1\text{H-NMR}$  (400 MHz,  $\text{CDCl}_3$ )  $\delta$  9.43 (s, 1H), 8.30-8.40 (m, 1H), 7.70-7.80 (m, 1H), 7.35-7.50 (m, 3H), 7.15-7.30 (m, 6H), 5.05 (s,

1H), 1.52 (s, 9H);  $^{13}\text{C}$ -NMR (100 MHz,  $\text{CDCl}_3$ )  $\delta$  27.94, 57.61, 83.94, 116.12, 119.92, 122.84, 125.20, 126.51, 127.11, 127.30, 128.63, 129.48, 134.41, 137.17, 151.78, 175.85. MS(EI):  $m/z$  (%): 334 ( $\text{M}^+$ , 6.23), 231 (100); HRMS (EI) calcd. for  $\text{C}_{22}\text{H}_{22}\text{O}_3$ : 334.1569, found: 334.1576.

### 31) The synthesis of 4ae

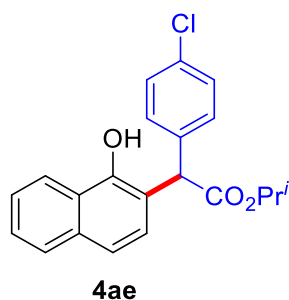

**4ae**, light yellow oil, (125.2 mg, 88% yield).  $^1\text{H}$ -NMR (400 MHz,  $\text{CDCl}_3$ )  $\delta$  9.18 (s, 1H), 8.30-8.40 (m, 1H), 7.80-7.85 (m, 1H), 7.40-7.55 (m, 3H), 7.15-7.30 (m, 5H), 5.21 (hept,  $J = 6.4$  Hz, 1H), 5.13 (s, 1H), 1.39 (d,  $J = 6.4$  Hz, 3H), 1.31 (d,  $J = 6.4$  Hz, 3H);  $^{13}\text{C}$ -NMR (100 MHz,  $\text{CDCl}_3$ )  $\delta$  21.53, 21.66, 55.89, 70.82, 115.66, 120.30, 122.65, 125.42, 126.41, 126.70, 127.20, 128.80, 128.82, 129.00, 133.33, 134.47, 135.40, 151.53, 175.49. MS(EI):  $m/z$  (%): 354 ( $\text{M}^+$ , 14.58), 356 ( $[\text{M}+2]^+$ , 5.02), 231 (100); HRMS (EI) calcd. for  $\text{C}_{21}\text{H}_{19}\text{O}_3\text{Cl}$ : 354.1023, found: 354.1018.

### 32) The synthesis of 4af

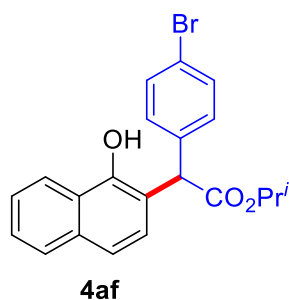

**4af**, colorless oil, (130.0 mg, 82% yield).  $^1\text{H}$ -NMR (400 MHz,  $\text{CDCl}_3$ )  $\delta$  9.15 (s, 1H), 8.32-8.38 (m, 1H), 7.78-7.84 (m, 1H), 7.48-7.55 (m, 2H), 7.40-7.46 (m, 3H), 7.23 (d,  $J = 8.4$  Hz, 1H), 7.15 (d,  $J = 8.4$  Hz, 2H), 5.20 (hept,  $J = 6.4$  Hz, 1H), 5.10 (s, 1H), 1.39 (d,  $J = 6.4$  Hz, 3H), 1.30 (d,  $J = 6.4$  Hz, 3H);  $^{13}\text{C}$ -NMR (100 MHz,  $\text{CDCl}_3$ )  $\delta$  21.54,

21.67, 55.96, 70.85, 115.58, 120.31, 121.48, 122.65, 125.43, 126.41, 126.72, 127.20, 129.00, 129.17, 131.76, 134.48, 135.94, 151.53, 175.42. MS(EI):  $m/z$  (%): 398 ( $M^+$ , 7.77), 400 ( $[M+2]^+$ , 7.90), 231 (100); HRMS (EI) calcd. for  $C_{21}H_{19}O_3Br$ : 398.0518, found: 398.0532.

### 33) The synthesis of 4ag

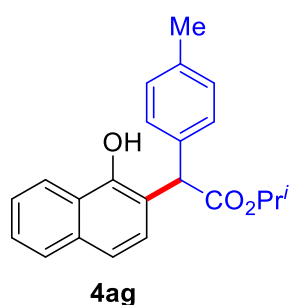

**4ag**, colorless oil, (117.7 mg, 88% yield). <sup>1</sup>H-NMR (400 MHz, CDCl<sub>3</sub>) δ 9.25 (s, 1H), 8.25-8.35 (m, 1H), 7.70-7.80 (m, 1H), 7.35-7.50 (m, 3H), 7.15-7.30 (m, 5H), 5.15 (hept,  $J = 6.4$  Hz, 1H), 5.08 (s, 1H), 2.28 (s, 3H), 1.34 (d,  $J = 6.4$  Hz, 3H), 1.27 (d,  $J = 6.4$  Hz, 3H); <sup>13</sup>C-NMR (100 MHz, CDCl<sub>3</sub>) δ 20.97, 21.58, 21.68, 56.34, 70.51, 116.07, 120.00, 122.79, 125.22, 126.47, 126.51, 127.12, 127.21, 129.33, 129.38, 133.84, 134.40, 137.09, 151.64, 176.03. MS(EI):  $m/z$  (%): 334 ( $M^+$ , 16.49), 231 (100); HRMS (EI) calcd. for  $C_{22}H_{22}O_3$ : 334.1569, found: 334.1563.

### 34) The synthesis of 4ao

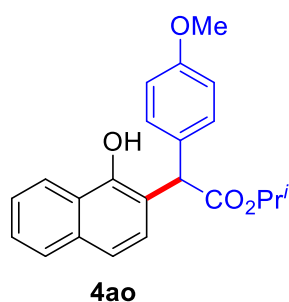

**4ao**, yellow oil, (73.8 mg, 53% yield). <sup>1</sup>H-NMR (500 MHz, CDCl<sub>3</sub>) δ 9.31 (s, 1H), 8.32-8.36 (m, 1H), 7.75-7.82 (m, 1H), 7.45-7.52 (m, 2H), 7.40 (d,  $J = 8.5$  Hz, 1H), 7.21 (d,  $J = 8.5$  Hz, 1H), 7.16 (d,  $J = 8.5$  Hz, 2H), 6.82 (d,  $J = 8.5$  Hz, 2H), 5.17 (hept,  $J = 6.5$  Hz, 1H), 5.06 (s, 1H), 3.76 (s, 3H), 1.36 (d,  $J = 6.5$  Hz, 3H), 1.28 (d,  $J = 6.5$  Hz,

3H);  $^{13}\text{C}$ -NMR (125 MHz,  $\text{CDCl}_3$ )  $\delta$  21.61, 21.72, 55.22, 55.99, 70.56, 114.05, 116.06, 120.02, 122.79, 125.26, 126.44, 126.55, 127.13, 128.47, 128.80, 129.32, 134.38, 151.62, 158.79, 176.17. HRMS (ESI) calcd. for  $[\text{C}_{22}\text{H}_{22}\text{O}_4 + \text{Na}]^+$ : 373.1410, found: 373.1416.

### 35) The synthesis of 4ap

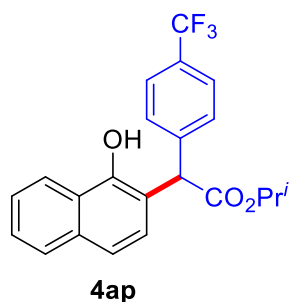

**4ap**, yellow oil, (80.2 mg, 52% yield).  $^1\text{H}$ -NMR (500 MHz,  $\text{CDCl}_3$ )  $\delta$  9.17 (s, 1H), 8.45-8.52 (m, 1H), 7.30-7.35 (m, 1H), 7.58 (d,  $J = 8.5$  Hz, 2H), 7.50-7.58 (m, 2H), 7.49 (d,  $J = 8.5$  Hz, 1H), 7.40 (d,  $J = 8.5$  Hz, 2H), 7.26 (d,  $J = 8.5$  Hz, 1H), 5.23 (hept,  $J = 6.0$  Hz, 1H), 5.21 (s, 1H), 1.41 (d,  $J = 6.0$  Hz, 3H), 1.32 (d,  $J = 6.0$  Hz, 3H);  $^{13}\text{C}$ -NMR (100 MHz,  $\text{CDCl}_3$ )  $\delta$  21.52, 21.65, 56.21, 71.06, 115.41, 120.47, 122.60, 123.98 (q,  $J = 270$  Hz, 1C), 125.53, 125.61 (q,  $J = 3.8$  Hz, 1C), 126.40, 126.82, 127.26, 127.83, 128.95, 129.65 (q,  $J = 32.5$  Hz, 1C), 134.53, 140.89, 151.56, 175.30; HRMS (ESI) calcd. for  $[\text{C}_{22}\text{H}_{19}\text{F}_3\text{O}_3 + \text{Na}]^+$ : 411.1178, found: 411.1189.

### 36) The synthesis of 4ah

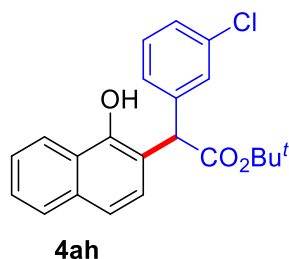

**4ah**, colorless oil, (116.9 mg, 79% yield).  $^1\text{H}$ -NMR (400 MHz,  $\text{CDCl}_3$ )  $\delta$  9.26 (s, 1H), 8.25-8.35 (m, 1H), 7.70-7.80 (m, 1H), 7.35-7.50 (m, 3H), 7.10-7.25 (m, 5H), 5.01 (s, 1H), 1.52 (s, 9H);  $^{13}\text{C}$ -NMR (100 MHz,  $\text{CDCl}_3$ )  $\delta$  27.91, 57.04, 84.33, 115.66, 120.19,

122.77, 125.35, 125.56, 126.50, 126.67, 127.18, 127.55, 127.64, 129.17, 129.83, 134.48, 134.50, 139.25, 151.68, 175.20. MS(EI): m/z (%): 368 (M<sup>+</sup>, 0.93), 370 ([M+2]<sup>+</sup>, 1.29), 231 (100); HRMS (EI) calcd. for C<sub>22</sub>H<sub>21</sub>O<sub>3</sub>Cl: 368.1179, found:368.1182.

### 37) The synthesis of 4ai

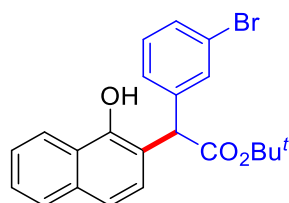

**4ai**

**4ai**, colorless oil, (133.2 mg, 81% yield). <sup>1</sup>H-NMR (400 MHz, CDCl<sub>3</sub>) δ 9.27 (s, 1H), 8.30-8.40 (m, 1H), 7.75-7.85 (m, 1H), 7.35-7.55 (m, 5H), 7.10-7.25 (m, 3H), 5.03 (s, 1H), 1.55 (s, 9H); <sup>13</sup>C-NMR (100 MHz, CDCl<sub>3</sub>) δ 27.92, 56.99, 84.35, 115.65, 120.20, 122.70, 122.77, 125.36, 126.02, 126.50, 126.68, 127.18, 129.15, 130.13, 130.49, 130.53, 134.48, 139.51, 151.66, 175.17. MS(EI): m/z (%): 412 (M<sup>+</sup>, 2.00), 414 ([M+2]<sup>+</sup>, 1.84), 231 (100); HRMS (EI) calcd. for C<sub>22</sub>H<sub>21</sub>O<sub>3</sub>Br: 412.0674, found:412.0668.

### 38) The synthesis of 4aj

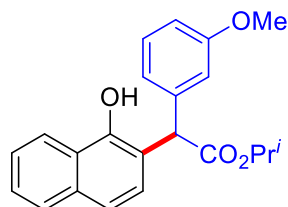

**4aj**

**4aj**, colorless oil, (105.6 mg, 75% yield). <sup>1</sup>H-NMR (400 MHz, CDCl<sub>3</sub>) δ 9.23 (s, 1H), 8.30-8.35 (m, 1H), 7.70-7.80 (m, 1H), 7.35-7.50 (m, 3H), 7.15-7.25 (m, 2H), 6.70-6.85 (m, 3H), 5.16 (hept, *J* = 6.4 Hz, 1H), 5.09 (s, 1H), 3.70 (s, 3H), 1.35 (d, *J* = 6.4 Hz, 3H), 1.27 (d, *J* = 6.4 Hz, 3H); <sup>13</sup>C-NMR (100 MHz, CDCl<sub>3</sub>) δ 21.56, 21.67, 55.09, 56.51, 70.58, 112.44, 113.63, 115.88, 119.71, 120.06, 122.74, 125.25, 126.43, 126.54, 127.13, 129.26, 129.64, 134.43, 138.40, 151.63, 159.77, 175.67. MS(EI): m/z (%): 350 (M<sup>+</sup>, 29.71), 231 (100); HRMS (EI) calcd. for C<sub>22</sub>H<sub>22</sub>O<sub>4</sub>: 350.1518, found: 350.1526.

### 39) The synthesis of 4ak

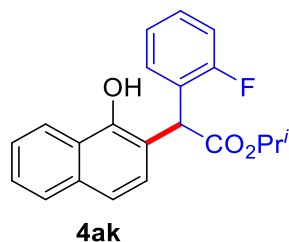

**4ak**, colorless oil, (103.3 mg, 76% yield). <sup>1</sup>H-NMR (400 MHz, CDCl<sub>3</sub>) δ 8.75 (s, 1H), 8.25-8.35 (m, 1H), 7.70-7.80 (m, 1H), 7.35-7.50 (m, 3H), 7.20-7.30 (m, 2H), 6.95-7.15 (m, 3H), 5.24 (s, 1H), 5.13 (hept, *J* = 6.4 Hz, 1H), 1.33 (d, *J* = 6.4 Hz, 3H), 1.21 (d, *J* = 6.4 Hz, 3H); <sup>13</sup>C-NMR (100 MHz, CDCl<sub>3</sub>) δ 21.37, 21.47, 50.82, 70.62, 113.79, [115.36, *J* = 22 Hz, 1C], 120.43, 122.63, [123.65, *J* = 15 Hz, 1C], [124.22, *J* = 4 Hz, 1C], 125.40, 126.20, 126.71, 127.25, [129.32, *J* = 25 Hz, 1C], 129.37, 134.53, 151.85, 159.46, 161.91, 174.94.

### 40) The synthesis of 4al

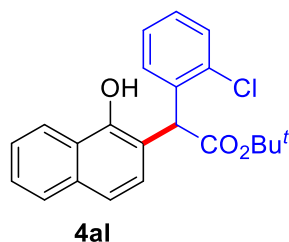

**4al**, colorless oil, (110.1 mg, 75% yield). <sup>1</sup>H-NMR (400 MHz, CDCl<sub>3</sub>) δ 8.25-8.35 (m, 1H), 8.26 (s, 1H), 7.75-7.85 (m, 1H), 7.40-7.50 (m, 4H), 7.10-7.30 (m, 4H), 5.34 (s, 1H), 1.46 (s, 9H); <sup>13</sup>C-NMR (100 MHz, CDCl<sub>3</sub>) δ 27.76, 54.98, 83.61, 114.63, 120.44, 122.52, 125.37, 126.03, 126.64, 127.00, 127.29, 128.89, 129.17, 129.81, 130.00, 134.18, 134.31, 134.39, 151.58, 174.03. MS(EI): *m/z* (%): 368 (M<sup>+</sup>, 2.63), 370 ([M+2]<sup>+</sup>, 0.96), 231 (100); HRMS (EI) calcd. for C<sub>22</sub>H<sub>21</sub>O<sub>3</sub>Cl: 368.1179, found: 368.1187.

### 41) The synthesis of 4am



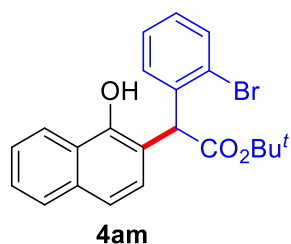

**4am**, yellow oil, (113.3 mg, 69% yield).  $^1\text{H-NMR}$  (400 MHz,  $\text{CDCl}_3$ )  $\delta$  8.25-8.35 (m, 1H), 8.07 (s, 1H), 7.75-7.85 (m, 1H), 7.60 (d,  $J = 8.0$  Hz, 1H), 7.45-7.55 (m, 2H), 7.41 (d,  $J = 8.4$  Hz, 1H), 7.10-7.30 (m, 4H), 5.39 (s, 1H), 1.47 (s, 9H);  $^{13}\text{C-NMR}$  (100 MHz,  $\text{CDCl}_3$ )  $\delta$  27.80, 56.85, 83.58, 115.26, 120.47, 122.42, 124.78, 125.40, 125.97, 126.62, 127.33, 127.66, 128.96, 129.12, 130.32, 133.22, 134.34, 136.22, 151.28, 173.69. MS(EI):  $m/z$  (%): 412 ( $\text{M}^+$ , 1.49), 414 ( $[\text{M}+2]^+$ , 1.50), 231 (100); HRMS (EI) calcd. for  $\text{C}_{22}\text{H}_{21}\text{O}_3\text{Br}$ : 412.0674, found:412.0677.

#### 42) The synthesis of 4an

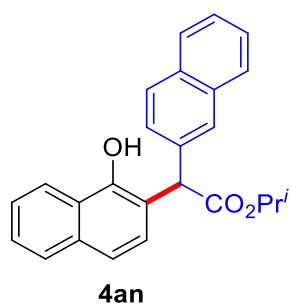

**4an**, colorless oil, (123.5 mg, 83% yield).  $^1\text{H-NMR}$  (400 MHz,  $\text{CDCl}_3$ )  $\delta$  9.25 (s, 1H), 7.35-7.45 (m, 1H), 7.70-7.90 (m, 5H), 7.45-7.55 (m, 5H), 7.41 (d,  $J = 8.4$  Hz, 1H), 7.34 (d,  $J = 8.4$  Hz, 1H), 5.35 (s, 1H), 5.26 (hept,  $J = 6.4$  Hz, 1H), 1.43 (d,  $J = 6.4$  Hz, 3H), 1.35 (d,  $J = 6.4$  Hz, 3H);  $^{13}\text{C-NMR}$  (100 MHz,  $\text{CDCl}_3$ )  $\delta$  21.59, 21.72, 56.66, 70.64, 115.96, 120.14, 122.77, 125.30, 125.56, 126.07, 126.11, 126.21, 126.46, 126.60, 127.18, 127.49, 128.06, 128.48, 129.29, 132.55, 133.26, 134.22, 134.46, 151.71, 175.65. MS(EI):  $m/z$  (%): 370 ( $\text{M}^+$ , 11.25), 281 (100); HRMS (EI) calcd. for  $\text{C}_{25}\text{H}_{22}\text{O}_3$ : 370.1569, found: 370.1561.

#### 43) The synthesis of 4bd

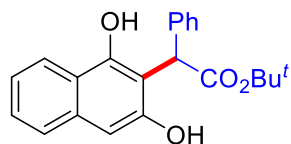

**4bd**

**4bd**, colorless oil, (104.4 mg, 75% yield).  $^1\text{H-NMR}$  (400 MHz,  $\text{CDCl}_3$ )  $\delta$  8.98 (s, 1H), 8.17 (d,  $J = 8.0$  Hz, 1H), 7.92 (d,  $J = 8.8$  Hz, 1H), 7.47 (t,  $J = 8.0$  Hz, 1H), 7.31 (t,  $J = 7.6$  Hz, 1H), 7.15-7.25 (m, 5H), 6.52 (s, 2H), 5.80 (s, 1H), 1.50 (s, 9H);  $^{13}\text{C-NMR}$  (100 MHz,  $\text{CDCl}_3$ )  $\delta$  27.94, 49.43, 83.77, 103.12, 107.63, 120.96, 121.63, 122.31, 122.71, 127.03, 127.37, 127.60, 128.48, 134.23, 137.51, 153.07, 154.33, 176.32. MS(EI):  $m/z$  (%): 350 ( $\text{M}^+$ , 0.83), 247 (100); HRMS (EI) calcd. for  $\text{C}_{22}\text{H}_{22}\text{O}_4$ : 350.1518, found: 350.1511.

#### 44) The synthesis of 4cd

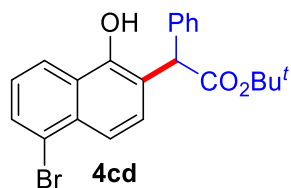

**4cd**, yellow oil, (137.5 mg, 83% yield).  $^1\text{H-NMR}$  (400 MHz,  $\text{CDCl}_3$ )  $\delta$  9.71(s, 1H), 8.34 (d,  $J = 8.4$  Hz, 1H), 7.70-7.80 (m, 2H), 7.20-7.35 (m, 7H), 5.06 (s, 1H), 1.52 (s, 9H);  $^{13}\text{C-NMR}$  (100 MHz,  $\text{CDCl}_3$ )  $\delta$  27.92, 57.65, 84.28, 117.04, 119.06, 122.08, 122.93, 125.39, 127.19, 127.43, 127.91, 128.71, 130.56, 130.78, 132.95, 136.83, 151.97, 175.89. MS(EI):  $m/z$  (%): 412 ( $\text{M}^+$ , 3.90), 414 ( $[\text{M}+2]^+$ , 4.03), 311 (100); HRMS (EI) calcd. for  $\text{C}_{22}\text{H}_{21}\text{O}_3\text{Br}$ : 412.0674, found: 412.0668.

#### 45) The synthesis of 4dd

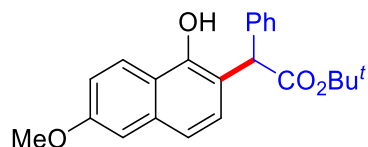

**4dd**

**4dd**, colorless oil, (124.9 mg, 86% yield).  $^1\text{H-NMR}$  (400 MHz,  $\text{CDCl}_3$ )  $\delta$  9.46 (s, 1H), 8.30 (d,  $J = 9.2$  Hz, 1H), 7.10-7.40 (m, 9H), 5.07 (s, 1H), 3.94 (s, 3H), 1.57 (s, 9H);

$^{13}\text{C}$ -NMR (100 MHz,  $\text{CDCl}_3$ )  $\delta$  27.93, 55.24, 57.50, 83.87, 105.26, 114.24, 117.65, 118.81, 121.76, 124.64, 127.26, 128.60, 130.26, 135.86, 137.36, 152.00, 158.31, 176.01. MS(EI):  $m/z$  (%): 364 ( $\text{M}^+$ , 8.73), 261 (100); HRMS (EI) calcd. for  $\text{C}_{23}\text{H}_{24}\text{O}_4$ : 364.1675, found: 364.1680.

#### 46) The synthesis of 4ed

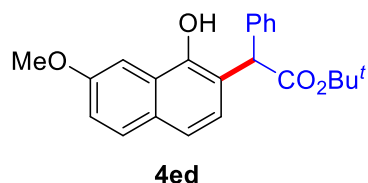

**4ed**, colorless oil, (126.8 mg, 86% yield).  $^1\text{H}$ -NMR (400 MHz,  $\text{CDCl}_3$ )  $\delta$  9.46 (s, 1H), 7.60-7.70 (m, 2H), 7.05-7.40 (m, 8H), 5.03 (s, 1H), 3.91 (s, 3H), 1.53 (s, 9H);  $^{13}\text{C}$ -NMR (100 MHz,  $\text{CDCl}_3$ )  $\delta$  27.94, 55.28, 57.71, 83.96, 100.81, 116.77, 119.50, 119.75, 127.11, 127.23, 127.27, 127.52, 128.62, 128.70, 129.90, 137.22, 150.73, 157.45, 176.05. MS(EI):  $m/z$  (%): 364 ( $\text{M}^+$ , 8.02), 261 (100); HRMS (EI) calcd. for  $\text{C}_{23}\text{H}_{24}\text{O}_4$ : 364.1675, found: 364.1671.

#### 47) The synthesis of 4fd

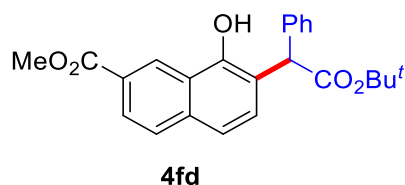

**4-4fd**, light yellow oil, (133.3 mg, 85% yield).  $^1\text{H}$ -NMR (400 MHz,  $\text{CDCl}_3$ )  $\delta$  9.76 (s, 1H), 9.12 (s, 1H), 8.06 (dd,  $J = 8.4$  Hz, 1.6 Hz, 1H), 7.79 (d,  $J = 8.8$  Hz, 1H), 7.40 (d,  $J = 8.4$  Hz, 1H), 7.20-7.35 (m, 6H), 5.07 (s, 1H), 3.94 (s, 3H), 1.53 (s, 9H);  $^{13}\text{C}$ -NMR (100 MHz,  $\text{CDCl}_3$ )  $\delta$  27.90, 52.04, 57.52, 84.21, 117.10, 119.61, 125.70, 125.94, 126.34, 126.68, 127.26, 127.37, 127.42, 128.70, 132.05, 136.41, 136.89, 152.99, 167.37, 175.72. MS(EI):  $m/z$  (%): 392 ( $\text{M}^+$ , 3.96), 289 (100); HRMS (EI) calcd. for  $\text{C}_{24}\text{H}_{24}\text{O}_5$ : 392.1624, found: 392.1628.

#### 48) The synthesis of 4gd

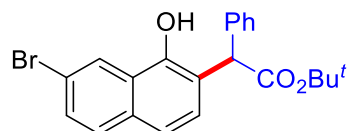

**4gd**

**4gd**, colorless oil, (138.5 mg, 84% yield).  $^1\text{H-NMR}$  (400 MHz,  $\text{CDCl}_3$ )  $\delta$  9.57 (s, 1H), 8.43 (s, 1H), 7.53 (d,  $J = 8.8$  Hz, 1H), 7.44 (dd,  $J = 8.8$  Hz, 1.6 Hz, 1H), 7.10-7.30 (m, 7H), 4.95 (s, 1H), 1.44 (s, 9H);  $^{13}\text{C-NMR}$  (100 MHz,  $\text{CDCl}_3$ )  $\delta$  27.92, 57.73, 84.27, 117.16, 119.37, 119.74, 125.48, 127.20, 127.43, 127.71, 128.71, 128.77, 129.86, 129.96, 132.78, 136.86, 151.05, 175.85. MS(EI):  $m/z$  (%): 412 ( $\text{M}^+$ , 4.17), 414 ( $[\text{M}+2]^+$ , 4.08), 311 (100); HRMS (EI) calcd. for  $\text{C}_{22}\text{H}_{21}\text{O}_3\text{Br}$ : 412.0674, found: 412.0666.

#### 49) The synthesis of 4hd

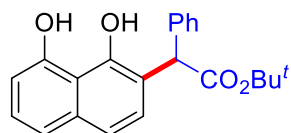

**4hd**

**4hd**, colorless oil, (92.7 mg, 66% yield).  $^1\text{H-NMR}$  (400 MHz,  $\text{CDCl}_3$ )  $\delta$  10.97 (s, 1H), 9.81 (s, 1H), 7.20-7.35 (m, 8H), 7.11 (d,  $J = 8.4$  Hz, 1H), 6.77 (dd,  $J = 6.8$  Hz, 1.6 Hz, 1H), 5.08 (s, 1H), 1.54 (s, 9H);  $^{13}\text{C-NMR}$  (100 MHz,  $\text{CDCl}_3$ )  $\delta$  27.92, 56.74, 84.46, 109.87, 115.96, 116.68, 118.77, 120.72, 127.35, 127.38, 127.50, 128.66, 129.09, 136.57, 136.97, 152.06, 154.84, 176.72. MS(EI):  $m/z$  (%): 350 ( $\text{M}^+$ , 6.39), 247 (100); HRMS (EI) calcd. for  $\text{C}_{22}\text{H}_{22}\text{O}_4$ : 350.1518, found: 350.1514.

#### 50) The synthesis of 7a

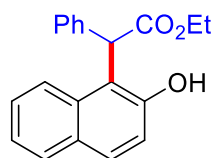

**7a**

**7a**, colorless oil, (117.0 mg, 95% yield).  $^1\text{H-NMR}$  (400 MHz,  $\text{CDCl}_3$ )  $\delta$  8.45 (s, 1H), 8.01 (d,  $J = 8.4$  Hz, 1H), 7.80 (d,  $J = 8.0$  Hz, 1H), 7.75 (d,  $J = 8.8$  Hz, 1H), 7.49 (t,  $J = 7.6$  Hz, 1H), 7.34 (t,  $J = 7.6$  Hz, 1H), 7.10-7.30 (m, 6H), 5.99 (s, 1H), 4.36 (q,  $J = 7.2$

Hz, 1H), 4.23 (q,  $J = 7.2$  Hz, 1H), 1.30 (t,  $J = 7.2$  Hz, 3H);  $^{13}\text{C}$ -NMR (100 MHz,  $\text{CDCl}_3$ )  $\delta$  14.05, 48.51, 62.49, 114.62, 120.53, 121.70, 123.20, 127.12, 127.30, 127.48, 128.58, 128.91, 129.39, 130.34, 133.30, 136.61, 154.08, 176.22. MS(EI):  $m/z$  (%): 306 ( $\text{M}^+$ , 5.40), 231 (100); HRMS (EI) calcd. for  $\text{C}_{20}\text{H}_{18}\text{O}_3$ : 306.1256, found: 306.1258.

### 51) The synthesis of 7b

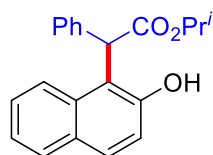

**7b**

**7b**, colorless oil, (121.3 mg, 95% yield).  $^1\text{H}$ -NMR (400 MHz,  $\text{CDCl}_3$ )  $\delta$  8.75 (s, 1H), 8.02 (d,  $J = 8.8$  Hz, 1H), 7.81 (d,  $J = 8.0$  Hz, 1H), 7.76 (d,  $J = 9.2$  Hz, 1H), 7.49 (t,  $J = 8.4$  Hz, 1H), 7.35 (t,  $J = 7.2$  Hz, 1H), 7.10-7.30 (m, 6H), 5.96 (s, 1H), 5.17 (hept,  $J = 6.4$  Hz, 1H), 1.37 (d,  $J = 6.4$  Hz, 3H), 1.21 (d,  $J = 6.4$  Hz, 3H);  $^{13}\text{C}$ -NMR (100 MHz,  $\text{CDCl}_3$ )  $\delta$  21.51, 21.77, 48.81, 70.52, 114.47, 120.69, 121.65, 123.14, 127.07, 127.26, 127.33, 128.58, 128.90, 129.36, 130.31, 133.37, 136.72, 154.29, 175.88. MS(EI):  $m/z$  (%): 320 ( $\text{M}^+$ , 26.30), 233 (100); HRMS (EI) calcd. for  $\text{C}_{21}\text{H}_{20}\text{O}_3$ : 320.1412, found: 320.1416.

### 52) The synthesis of 7c

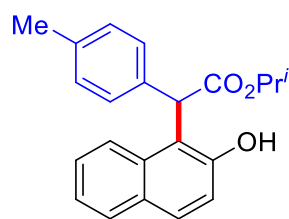

**7c**

**7c**, colorless oil, (107.7 mg, 81% yield).  $^1\text{H}$ -NMR (400 MHz,  $\text{CDCl}_3$ )  $\delta$  8.80 (s, 1H), 8.05 (d,  $J = 8.8$  Hz, 1H), 7.84 (d,  $J = 7.6$  Hz, 1H), 7.79 (d,  $J = 8.8$  Hz, 1H), 7.53 (t,  $J = 8.4$  Hz, 1H), 7.38 (t,  $J = 7.2$  Hz, 1H), 7.22 (d,  $J = 8.8$  Hz, 1H), 7.00-7.10 (m, 4H), 5.96 (s, 1H), 5.20 (hept,  $J = 6.4$  Hz, 1H), 2.32 (s, 3H), 1.41 (d,  $J = 6.4$  Hz, 3H), 1.24 (d,  $J = 6.4$  Hz, 3H);  $^{13}\text{C}$ -NMR (100 MHz,  $\text{CDCl}_3$ )  $\delta$  20.98, 21.52, 21.78, 48.52, 70.46, 114.57,

120.76, 121.66, 123.10, 127.04, 127.18, 128.89, 129.32, 129.36, 130.24, 133.39, 133.66, 136.94, 154.33, 176.03. MS(EI):  $m/z$  (%): 334 ( $M^+$ , 11.86), 231 (100); HRMS (EI) calcd. for  $C_{22}H_{22}O_3$ : 334.1569, found: 334.1563.

### 53) The synthesis of 7d

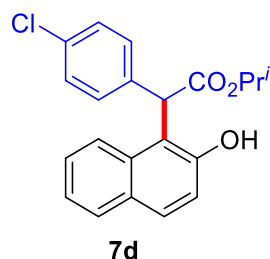

**7d**, colorless oil, (140.2 mg, 99% yield).  $^1H$ -NMR (400 MHz,  $CDCl_3$ )  $\delta$  8.49 (s, 1H), 7.96 (d,  $J = 8.8$  Hz, 1H), 7.81 (d,  $J = 8.0$  Hz, 1H), 7.75 (d,  $J = 8.8$  Hz, 1H), 7.49 (t,  $J = 8.4$  Hz, 1H), 7.35 (t,  $J = 7.6$  Hz, 1H), 7.10-7.25 (m, 5H), 5.88 (s, 1H), 5.16 (hept,  $J = 6.4$  Hz, 1H), 1.35 (d,  $J = 6.4$  Hz, 3H), 1.19 (d,  $J = 6.4$  Hz, 3H);  $^{13}C$ -NMR (100 MHz,  $CDCl_3$ )  $\delta$  21.47, 21.75, 48.25, 70.65, 114.47, 120.45, 121.60, 123.28, 127.19, 128.68, 128.96, 129.41, 130.47, 133.10, 133.18, 135.37, 153.94, 175.42. MS(EI):  $m/z$  (%): 354 ( $M^+$ , 6.74), 231 (100); HRMS (EI) calcd. for  $C_{21}H_{19}O_3Cl$ : 354.1023, found: 354.1019.

### 54) The synthesis of 7e

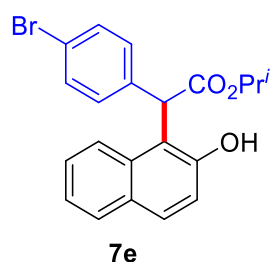

**7e**, colorless oil, (159.5 mg, 99% yield).  $^1H$ -NMR (400 MHz,  $CDCl_3$ )  $\delta$  8.50 (s, 1H), 7.99 (d,  $J = 8.8$  Hz, 1H), 7.84 (d,  $J = 8.0$  Hz, 1H), 7.78 (d,  $J = 8.8$  Hz, 1H), 7.50-7.55 (m, 1H), 7.35-7.40 (m, 3H), 7.18 (d,  $J = 8.8$  Hz, 1H), 7.09 (d,  $J = 8.4$  Hz, 2H), 5.89 (s, 1H), 5.19 (hept,  $J = 6.4$  Hz, 1H), 1.38 (d,  $J = 6.4$  Hz, 3H), 1.21 (d,  $J = 6.4$  Hz, 3H);  $^{13}C$ -NMR (100 MHz,  $CDCl_3$ )  $\delta$  21.46, 21.75, 48.32, 70.65, 114.42, 120.43, 121.23, 121.59, 123.29, 127.19, 128.96, 129.32, 129.41, 130.48, 131.62, 133.17, 135.92, 153.92, 175.31. MS(EI):  $m/z$  (%): 398 ( $M^+$ , 5.08), 400 ( $[M+2]^+$ , 5.56), 231 (100); HRMS (EI)

calcd. for C<sub>21</sub>H<sub>19</sub>O<sub>3</sub>Br: 398.0518, found: 398.0517.

### 55) The synthesis of 7f

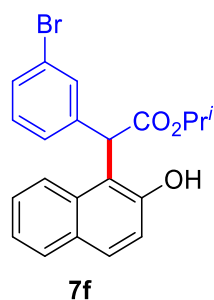

**7f**, colorless oil, (130.9 mg, 82% yield). <sup>1</sup>H-NMR (400 MHz, CDCl<sub>3</sub>) δ 8.47 (s, 1H), 7.98 (d, *J* = 8.4 Hz, 1H), 7.84 (d, *J* = 8.0 Hz, 1H), 7.79 (d, *J* = 8.8 Hz, 1H), 7.50-7.55 (m, 1H), 7.30-7.40 (m, 3H), 7.10-7.20 (m, 3H), 5.91 (s, 1H), 5.19 (hept, *J* = 6.4 Hz, 1H), 1.38 (d, *J* = 6.4 Hz, 3H), 1.22 (d, *J* = 6.4 Hz, 3H); <sup>13</sup>C-NMR (100 MHz, CDCl<sub>3</sub>) δ 21.46, 21.76, 48.44, 70.70, 114.22, 120.42, 121.58, 122.65, 123.30, 126.28, 127.22, 128.97, 129.42, 130.03, 130.43, 130.55, 130.66, 133.17, 139.19, 153.93, 175.13. MS(EI): *m/z* (%): 398 (M<sup>+</sup>, 7.14), 400 ([M+2]<sup>+</sup>, 7.35), 231 (100); HRMS (EI) calcd. for C<sub>21</sub>H<sub>19</sub>O<sub>3</sub>Br: 398.0518, found: 398.0514.

### 56) The synthesis of 7g

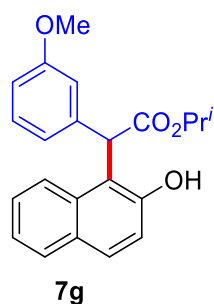

**7g**, colorless oil, (116.7 mg, 83% yield). <sup>1</sup>H-NMR (400 MHz, CDCl<sub>3</sub>) δ 8.78 (s, 1H), 8.04 (d, *J* = 8.4 Hz, 1H), 7.83 (d, *J* = 8.0 Hz, 1H), 7.78 (d, *J* = 8.8 Hz, 1H), 7.45-7.55 (m, 1H), 7.37 (t, *J* = 7.2 Hz, 1H), 7.15-7.25 (m, 2H), 6.70-6.85 (m, 3H), 5.96 (s, 1H), 5.19 (hept, *J* = 6.4 Hz, 1H), 3.72 (s, 3H), 1.40 (d, *J* = 6.4 Hz, 3H), 1.24 (d, *J* = 6.4 Hz, 3H); <sup>13</sup>C-NMR (100 MHz, CDCl<sub>3</sub>) δ 21.51, 21.77, 48.81, 55.07, 70.53, 112.17, 113.71, 114.33, 119.72, 120.69, 121.62, 123.12, 127.06, 128.89, 129.37, 129.55, 130.34, 133.38,

138.31, 154.36, 159.71, 175.69. MS(EI):  $m/z$  (%): 350 ( $M^+$ , 10.68), 231 (100); HRMS (EI) calcd. for  $C_{22}H_{22}O_4$ : 350.1518, found: 350.1515.

### 57) The synthesis of 7h

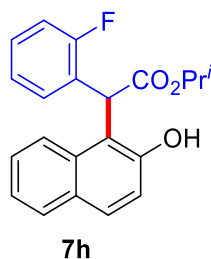

**7h**, white solid, (127.1 mg, 94% yield).  $^1H$ -NMR (400 MHz,  $CDCl_3$ )  $\delta$  8.15 (s, 1H), 7.96 (d,  $J = 8.8$  Hz, 1H), 7.70-7.85 (m, 2H), 7.40-7.50 (m, 1H), 7.30-7.35 (m, 1H), 6.90-7.25 (m, 5H), 6.02 (s, 1H), 5.13 (hept,  $J = 6.4$  Hz, 1H), 1.33 (d,  $J = 6.4$  Hz, 3H), 1.15 (d,  $J = 6.4$  Hz, 3H);  $^{13}C$ -NMR (100 MHz,  $CDCl_3$ )  $\delta$  21.40, 21.43, 43.63, 70.46, 112.26, [115.22,  $J = 22$  Hz, 1C], 120.07, 121.85, 123.30, [124.14,  $J = 4$  Hz, 1C], 127.13, 128.87, [129.31,  $J = 8$  Hz, 1C], [129.55,  $J = 9$  Hz, 1C], 129.63, 130.53, 133.21, 154.24, 159.93, 162.38, 174.92. MS(EI):  $m/z$  (%): 338 ( $M^+$ , 9.61), 249 (100); HRMS (EI) calcd. for  $C_{21}H_{19}O_3F$ : 338.1318, found: 338.1320.

### 58) The synthesis of 7i

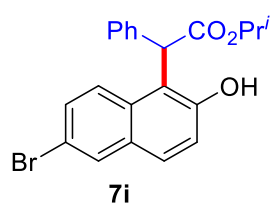

**7i**, colorless oil, (123.4 mg, 77% yield).  $^1H$ -NMR (400 MHz,  $CDCl_3$ )  $\delta$  8.74 (s, 1H), 7.94 (d,  $J = 2.0$  Hz, 1H), 7.87 (d,  $J = 9.2$  Hz, 1H), 7.65 (d,  $J = 8.8$  Hz, 1H), 7.54 (dd,  $J = 9.2$  Hz, 2 Hz, 1H), 7.10-7.30 (m, 6H), 5.88 (s, 1H), 5.17 (hept,  $J = 6.4$  Hz, 1H), 1.37 (d,  $J = 6.4$  Hz, 3H), 1.21 (d,  $J = 6.4$  Hz, 3H);  $^{13}C$ -NMR (100 MHz,  $CDCl_3$ )  $\delta$  21.50, 21.75, 48.90, 70.69, 114.83, 116.79, 121.82, 123.65, 127.31, 127.40, 128.66, 129.36, 130.17, 130.58, 130.72, 131.97, 136.39, 154.53, 175.56. MS(EI):  $m/z$  (%): 398 ( $M^+$ , 1.86), 400 ( $[M+2]^+$ , 1.91), 222 (100); HRMS (EI) calcd. for  $C_{21}H_{19}O_3Br$ : 398.0518,



found: 398.0523.

### 59) The synthesis of 7j

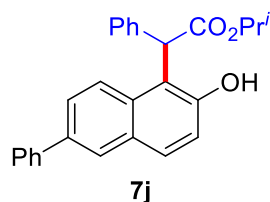

**7j**, colorless oil, (157.0 mg, 99% yield). <sup>1</sup>H-NMR (400 MHz, CDCl<sub>3</sub>) δ 8.76 (s, 1H), 8.00-8.10 (m, 1H), 7.81 (s, 1H), 7.60-7.80 (m, 4H), 7.10-7.50 (m, 9H), 5.98 (s, 1H), 5.18 (hept, *J* = 6.4 Hz, 1H), 1.37 (d, *J* = 6.4 Hz, 3H), 1.21 (d, *J* = 6.4 Hz, 3H); <sup>13</sup>C-NMR (100 MHz, CDCl<sub>3</sub>) δ 21.51, 21.77, 48.96, 70.55, 114.52, 121.11, 122.35, 126.58, 126.69, 127.09, 127.15, 127.29, 127.40, 128.61, 128.82, 129.64, 130.59, 132.58, 135.84, 136.70, 140.63, 154.36, 175.80. MS(EI): *m/z* (%): 396 (M<sup>+</sup>, 9.76), 307 (100); HRMS (EI) calcd. for C<sub>27</sub>H<sub>24</sub>O<sub>3</sub>: 396.1725, found: 396.1713.

### 60) The synthesis of 7k

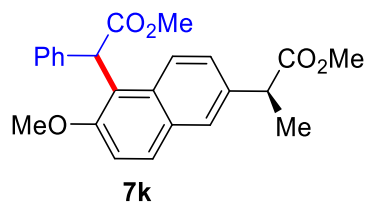

**7k**, colorless oil, (131.0 mg, 87% yield). <sup>1</sup>H-NMR (400 MHz, CDCl<sub>3</sub>) δ 7.75-7.85 (m, 2H), 7.69 (s, 1H), 7.15-7.40 (m, 7H), 5.73 (s, 1H), 3.92 (s, 3H), 3.82 (q, *J* = 7.2 Hz, 1H), 3.69 (s, 3H), 3.63 (s, 3H), 1.54 (d, *J* = 7.2 Hz, 3H); <sup>13</sup>C-NMR (100 MHz, CDCl<sub>3</sub>) δ 18.41, 45.06, 48.39, 51.99, 52.10, 56.54, 113.95, 120.53, 123.61, 126.86, 128.18, 129.12, 129.57, 131.84, 135.54, 135.57, 137.77, 154.45, 173.89, 174.90. MS(EI): *m/z* (%): 392 (M<sup>+</sup>, 17.56), 84 (100); HRMS (EI) calcd. for C<sub>24</sub>H<sub>24</sub>O<sub>5</sub>: 392.1624, found: 392.1626.

## 5. The transformations of products

### 1) the synthesis of **8a**

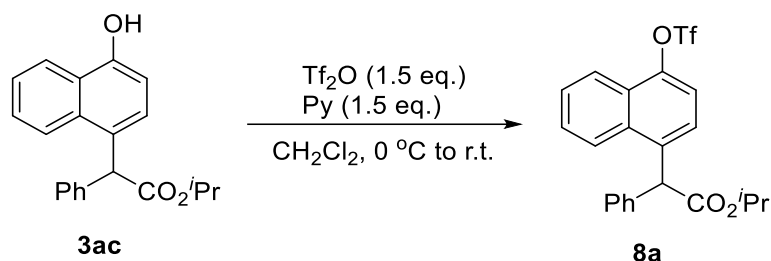

To a solution of **3ac** (64 mg, 0.2 mmol), pyridine (24  $\mu\text{L}$ , 0.3 mmol) in  $\text{CH}_2\text{Cl}_2$  (4 mL) was added  $\text{Tf}_2\text{O}$  (42  $\mu\text{L}$ , 0.3 mmol) at  $0\text{ }^\circ\text{C}$ . The reaction was warmed to room temperature after 5 mins and stirred for another 10 mins. The reaction was extracted with ethyl acetate and dried with  $\text{Na}_2\text{SO}_4$  and filtered. The filtrate was concentrated and purified by silica chromatography (PE/EA = 20:1) to obtain the desired product **8a** (90.4 mg, 99%) as a colorless oil.  $^1\text{H-NMR}$  (400 MHz,  $\text{CDCl}_3$ )  $\delta$  8.05-8.15 (m, 2H), 7.60-7.70 (m, 2H), 7.20-7.45 (m, 7H), 5.71 (s, 1H), 5.12 (hept,  $J = 6.4$  Hz, 1H), 1.25 (d,  $J = 6.4$  Hz, 3 H), 1.21 (d,  $J = 6.4$  Hz, 3 H);  $^{13}\text{C-NMR}$  (100 MHz,  $\text{CDCl}_3$ )  $\delta$  21.57, 21.63, 53.71, 69.14, 117.13, 118.71 [q,  $J = 18$  Hz, 1C], 121.64, 123.74, 125.77, 126.65, 127.54, 127.67, 127.87, 128.85, 128.89, 133.10, 135.80, 137.22, 145.20, 171.53. MS(EI):  $m/z$  (%): 452 ( $\text{M}^+$ , 22.74), 365 (100); HRMS (EI) calcd. for  $\text{C}_{22}\text{H}_{19}\text{O}_5\text{SF}_3$ : 452.0905, found: 452.0900.

### 2) the synthesis of **8b**

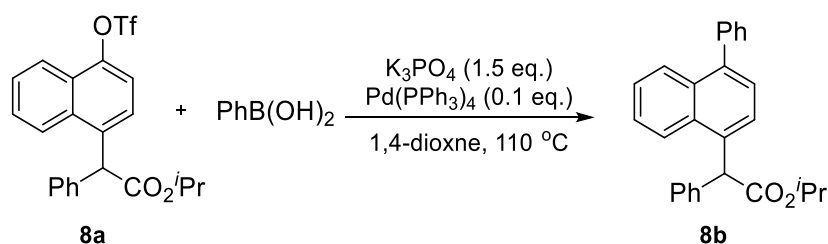

The mixture of **8a** (90 mg, 0.2 mmol), benzeneboronic (37 mg, 0.3 mmol),  $\text{K}_3\text{PO}_4$  (64 mg, 0.3 mmol),  $\text{Pd(PPh}_3)_4$  (23 mg, 0.02 mmol) in 1,4-dioxane (4 mL) was heated to  $110\text{ }^\circ\text{C}$  for 8 hours. The reaction was cooled to room temperature and extracted with ethyl acetate and dried with  $\text{Na}_2\text{SO}_4$ . The filtrate was concentrated and the residue was

purified by silica chromatography (PE/EA = 20:1) to obtain the desired product **8b** (65.3 mg, 86%) as a colorless oil. <sup>1</sup>H-NMR (400 MHz, CDCl<sub>3</sub>) δ 8.12 (d, *J* = 8.4 Hz, 1H), 7.96 (d, *J* = 8.4 Hz, 1H), 7.25-7.60 (m, 14H), 5.83 (s, 1H), 5.19 (hept, *J* = 6.4 Hz, 1H), 1.30 (d, *J* = 6.4 Hz, 3H), 1.28 (d, *J* = 6.4 Hz, 3H); <sup>13</sup>C-NMR (100 MHz, CDCl<sub>3</sub>) δ 21.67, 53.90, 68.79, 123.46, 125.65, 125.76, 126.20, 126.42, 127.06, 127.22, 127.31, 128.19, 128.63, 129.01, 130.10, 131.91, 132.15, 134.23, 138.07, 140.09, 140.66, 172.27. MS(EI): *m/z* (%): 380 (M<sup>+</sup>, 39.27), 293 (100); HRMS (EI) calcd. for C<sub>27</sub>H<sub>24</sub>O<sub>2</sub>: 380.1776, found: 380.1774.

### 3) the synthesis of **8c**

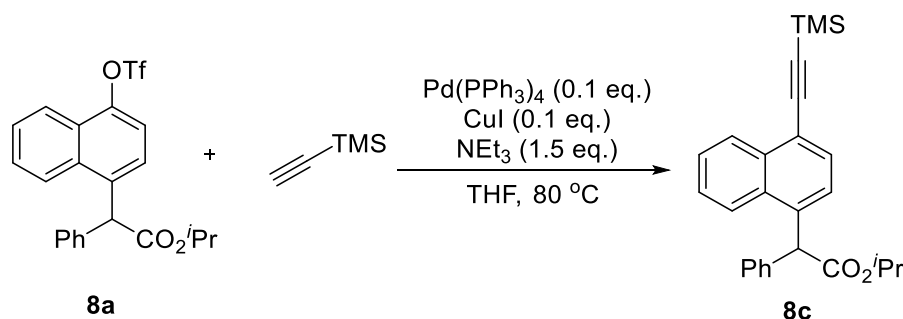

The mixture of **8a** (90 mg, 0.2 mmol), trimethylsilylacetylene (29  $\mu$ L, 0.3 mmol), CuI (3.8 mg, 0.02 mmol), Pd(PPh<sub>3</sub>)<sub>4</sub> (23 mg, 0.02 mmol), NEt<sub>3</sub> (43  $\mu$ L, 0.3 mmol) in THF (4 mL) was heated to 80  $^{\circ}$ C for 12 hours. The reaction was cooled to room temperature and extracted with ethyl acetate and dried with Na<sub>2</sub>SO<sub>4</sub>. The filtrate was concentrated and the residue was purified by silica chromatography (PE/EA = 20:1) to obtain the desired product **8c** (73.1 mg, 91%) as a colorless oil. <sup>1</sup>H-NMR (400 MHz, CDCl<sub>3</sub>) δ 8.26 (d, *J* = 8.4 Hz, 1H), 7.86 (d, *J* = 8.4 Hz, 1H), 7.51 (d, *J* = 7.2 Hz, 1H), 7.30-7.45 (m, 2H), 7.00-7.40 (m, 6H), 5.57 (s, 1H), 4.96 (hept, *J* = 6.4 Hz, 1H), 1.05 (d, *J* = 6.4 Hz, 3H), 1.04 (d, *J* = 6.4 Hz, 3H), 0.18 (s, 9H); <sup>13</sup>C-NMR (100 MHz, CDCl<sub>3</sub>) δ 0.06, 21.57, 21.62, 53.92, 68.83, 99.79, 102.98, 120.70, 123.60, 125.54, 126.52, 126.84, 127.17, 127.37, 128.63, 128.91, 130.33, 131.41, 133.77, 135.86, 137.78, 171.89. MS(EI): *m/z* (%): 400 (M<sup>+</sup>, 35.88), 313 (100); HRMS (EI) calcd. for C<sub>26</sub>H<sub>28</sub>O<sub>2</sub>Si: 400.1859, found: 400.1861.

#### 4) the synthesis of **8d**

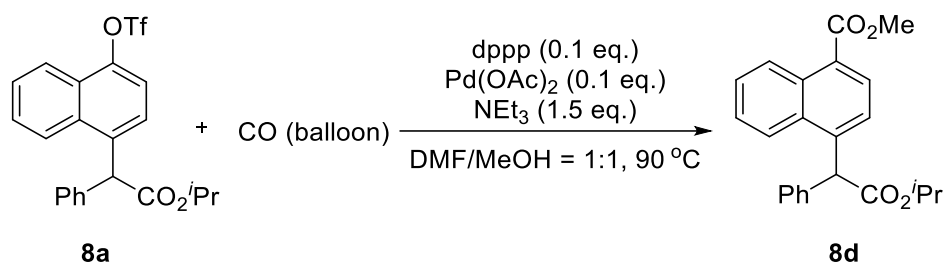

The mixture of **8a** (90 mg, 0.2 mmol), Pd(OAc)<sub>2</sub> (4.5 mg, 0.02 mmol), dppp (8.2 mg, 0.02 mmol), NEt<sub>3</sub> (43 μL, 0.3 mmol) in DMF (2 mL) and MeOH (2 mL) was heated to 90 °C under CO atmosphere (balloon) for 12 hours. The reaction was cooled to room temperature and extracted with ethyl acetate and dried with Na<sub>2</sub>SO<sub>4</sub>. The filtrate was concentrated and the residue was purified by silica chromatography (PE/EA = 20:1) to obtain the desired product **8d** (54.0 mg, 74%) as a colorless oil. <sup>1</sup>H-NMR (400 MHz, CDCl<sub>3</sub>) δ 8.95-9.00 (m, 1H), 8.10-8.20 (m, 2H), 7.55-7.65 (m, 2H), 7.25-7.45 (m, 6H), 5.79 (s, 1H), 5.14 (hept, *J* = 6.4 Hz, 1H), 4.00 (s, 3H), 1.24 (d, *J* = 6.4 Hz, 3H), 1.21 (d, *J* = 6.4 Hz, 3H); <sup>13</sup>C-NMR (100 MHz, CDCl<sub>3</sub>) δ 21.57, 52.15, 52.19, 54.13, 68.99, 123.58, 125.04, 126.57, 126.68, 127.01, 127.30, 127.49, 128.70, 128.91, 129.46, 131.68, 131.97, 137.46, 139.95, 167.91, 171.69. MS(EI): *m/z* (%): 362 (M<sup>+</sup>, 37.84), 275 (100); HRMS (EI) calcd. for C<sub>23</sub>H<sub>22</sub>O<sub>4</sub>: 362.1518, found: 362.1514.

#### 5) the synthesis of **8e**

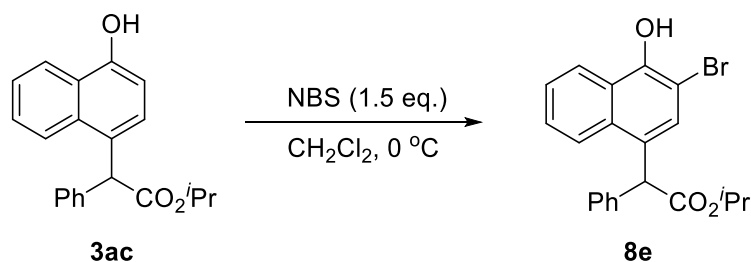

To a solution of **7a** (64 mg, 0.2 mmol) in CH<sub>2</sub>Cl<sub>2</sub> (4 mL) was added NBS (53 mg, 0.3 mmol) at 0 °C. The reaction was stirred at 0 °C for 15 min and quenched with saturated Na<sub>2</sub>S<sub>2</sub>O<sub>3</sub> solution and extracted with ethyl acetate, dried with Na<sub>2</sub>SO<sub>4</sub>. The filtrate was concentrated and the residue was purified by silica chromatography (PE/EA = 10:1) to obtain the desired product **8e** (77.2 mg, 97%) as a white solid. <sup>1</sup>H-NMR (400

MHz, CDCl<sub>3</sub>)  $\delta$  8.25-8.35 (m, 1H), 7.90-8.00 (m, 1H), 7.50-7.60 (m, 2H), 7.25-7.40 (m, 6H), 6.00 (s, 1H), 5.63 (s, 1H), 5.14 (hept,  $J = 6.4$  Hz, 1H), 1.26 (d,  $J = 6.4$  Hz, 3H), 1.23 (d,  $J = 6.4$  Hz, 3H); <sup>13</sup>C-NMR (100 MHz, CDCl<sub>3</sub>)  $\delta$  21.60, 21.62, 53.16, 68.90, 103.55, 123.12, 123.34, 124.80, 125.94, 127.22, 127.46, 128.49, 128.72, 128.83, 131.90, 137.60, 147.88, 171.99. MS(EI):  $m/z$  (%): 398 (M<sup>+</sup>, 28.52), 400 ([M+2]<sup>+</sup>, 28.84), 311 (100); HRMS (EI) calcd. for C<sub>21</sub>H<sub>19</sub>O<sub>3</sub>Br: 398.0518, found: 398.0522.

#### 6) the synthesis of **8f**

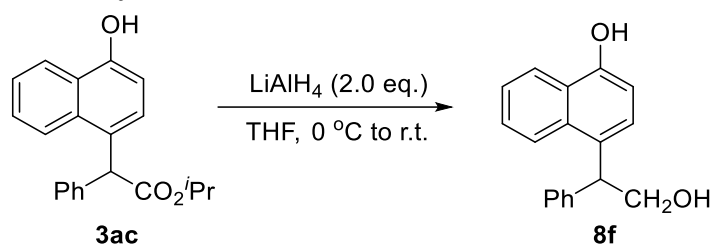

To a solution of **8f** (64 mg, 0.2 mmol) in THF (4 mL) was added LiAlH<sub>4</sub> (15 mg, 0.4 mmol) at 0 °C. The reaction was warmed to room temperature after 15 min and stirred for another 1 hour. The reaction was quenched with saturated NaHCO<sub>3</sub> solution and extracted with ethyl acetate, dried with Na<sub>2</sub>SO<sub>4</sub>. The filtrate was concentrated and the residue was purified by silica chromatography (PE/EA = 2:1) to obtain the desired product **8f** (51.3 mg, 97%) as a white solid. <sup>1</sup>H-NMR (400 MHz, Acetone-*d*<sub>6</sub>)  $\delta$  8.94 (s, 1H), 8.25-8.35 (m, 1H), 8.05-8.10 (m, 1H), 7.10-7.45 (m, 8H), 6.93 (d,  $J = 8.0$  Hz, 1H), 4.88 (t,  $J = 7.2$  Hz, 1H), 4.10-4.30 (m, 2H), 3.75-3.85 (m, 1H); <sup>13</sup>C-NMR (100 MHz, Acetone-*d*<sub>6</sub>)  $\delta$  49.65, 66.54, 108.30, 123.55, 124.52, 124.96, 126.05, 126.46, 126.90, 129.00, 129.41, 129.69, 134.26, 144.40, 152.84. MS(EI):  $m/z$  (%): 264 (M<sup>+</sup>, 17.79), 233 (100); HRMS (EI) calcd. for C<sub>18</sub>H<sub>16</sub>O<sub>2</sub>: 264.1150, found: 264.1159.

#### 7) the synthesis of **9**

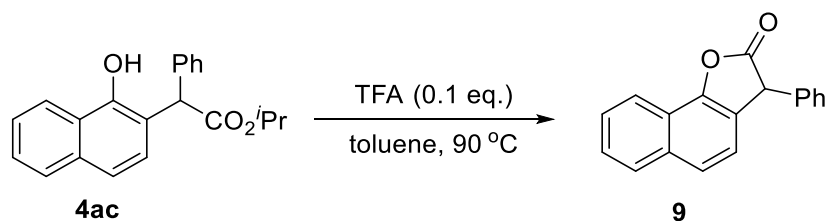

The solution of **4ac** (64 mg, 0.2 mmol) and TFA (2  $\mu$ L, 0.02 mmol) in toluene (4 mL)

was heated to 90 °C for 12 h. Then the reaction was cooled to room temperature and purified by silica chromatography (PE/EA = 20:1) directly to obtain the desired product **9** (51.5 mg, 99%) as a white solid. <sup>1</sup>H-NMR (400 MHz, CDCl<sub>3</sub>) δ 8.00 (d, *J* = 8.0 Hz, 1H), 7.80 (d, *J* = 8.0 Hz, 1H), 7.58 (d, *J* = 8.4 Hz, 1H), 7.45-7.55 (m, 2H), 7.10-7.30 (m, 6H), 4.96 (s, 1H); <sup>13</sup>C-NMR (100 MHz, CDCl<sub>3</sub>) δ 50.73, 119.79, 121.17, 121.54, 124.40, 126.93, 128.21, 128.24, 128.31, 129.13, 134.14, 135.05, 149.58, 175.58. MS(EI): *m/z* (%): 360 (M<sup>+</sup>, 27.90), 231 (100); HRMS (EI) calcd. for C<sub>18</sub>H<sub>12</sub>O<sub>2</sub>: 260.0837, found: 260.0841.

## 6. Preliminary mechanism studies

We performed a series of control experiments to confirm *ortho* selectivity stemmed from the coordination between hydroxyl group and gold. First, the reaction between 1-methoxynaphthalene and diazo compound under standard condition was conducted, delivering the *para* C-H bond functionalization product in 92% yield (scheme 1, eq 1). The structure was confirmed by additional experiment (scheme 1, eq 2, eq 3). In order to exclude the *para* selectivity arise from steric hindrance, we switch diazo compound to methyl 2-diazo-2-phenylacetate with less steric hindrance, affording only *para* C-H bond functionalization product (scheme 1, eq 4). These results indicated that the weak interaction between naphthol and gold catalyst played a key role in the *ortho*-selectivity.

The date of **10** was illustrated as following:

<sup>1</sup>H-NMR (400 MHz, CDCl<sub>3</sub>) δ 8.31 (d, *J* = 7.6 Hz, 1H), 7.93 (d, *J* = 7.6 Hz, 1H), 7.40-7.55 (m, 2H), 7.20-7.35 (m, 6H), 6.74 (d, *J* = 8.4 Hz, 1H), 5.64 (s, 1H), 5.11 (hept, *J* = 6.4 Hz, 1H), 3.96 (s, 3H), 1.21 (t, *J* = 6.8 Hz, 6H); <sup>13</sup>C-NMR (100 MHz, CDCl<sub>3</sub>) δ 21.66, 53.43, 55.41, 55.44, 68.56, 103.15, 122.70, 123.08, 124.94, 126.03, 126.31, 126.81, 127.12, 128.50, 128.91, 132.54, 138.49, 154.98, 172.52. MS(EI): *m/z* (%): 334 (M<sup>+</sup>, 24.12), 247 (100); HRMS (EI) calcd. for C<sub>22</sub>H<sub>22</sub>O<sub>3</sub>: 334.1569, found: 334.1566.

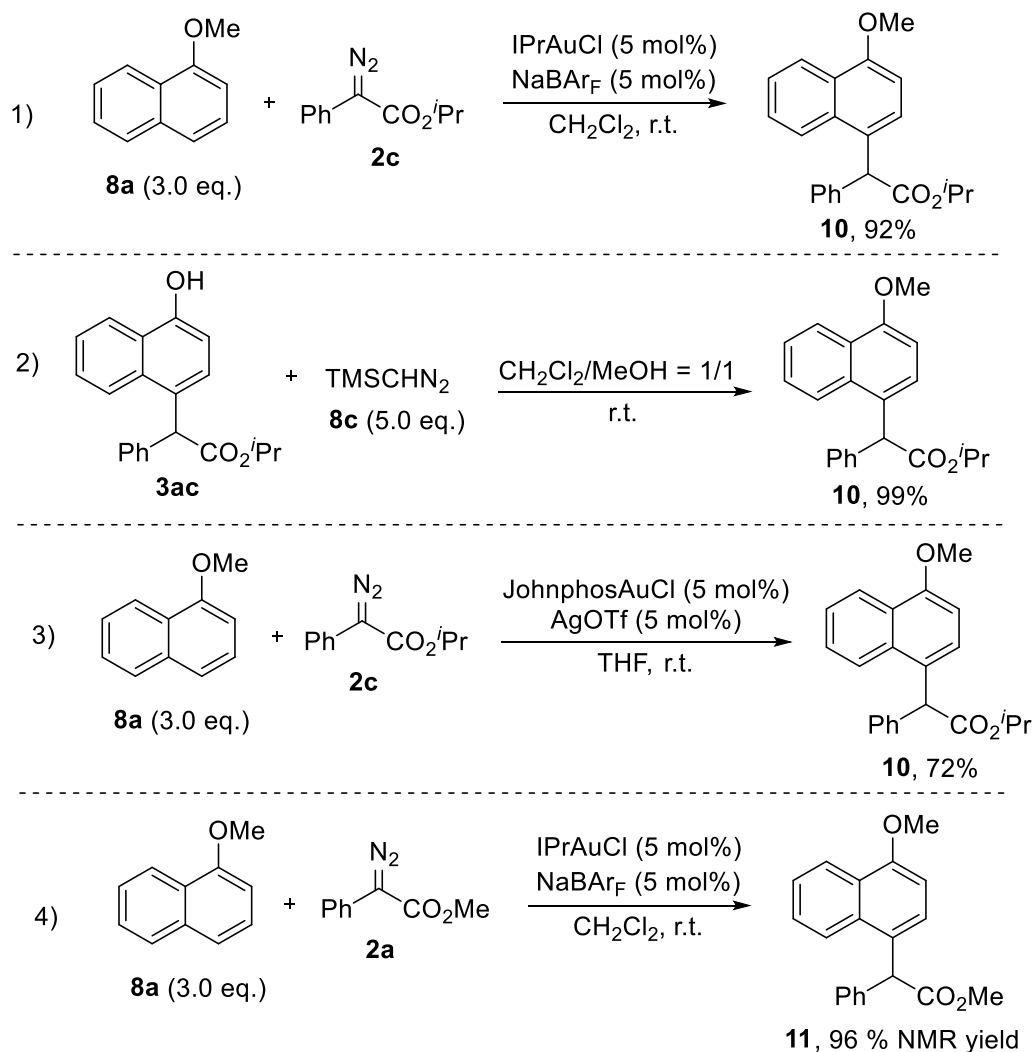

### Scheme 1 Weak interaction study

Subsequently, we further conducted a series of related control experiments to identify the type of weak interaction. First,  $^{31}\text{P}$ -NMR experiment shown that the coordination between gold catalyst and hydroxyl group was indeed existed (scheme 2).



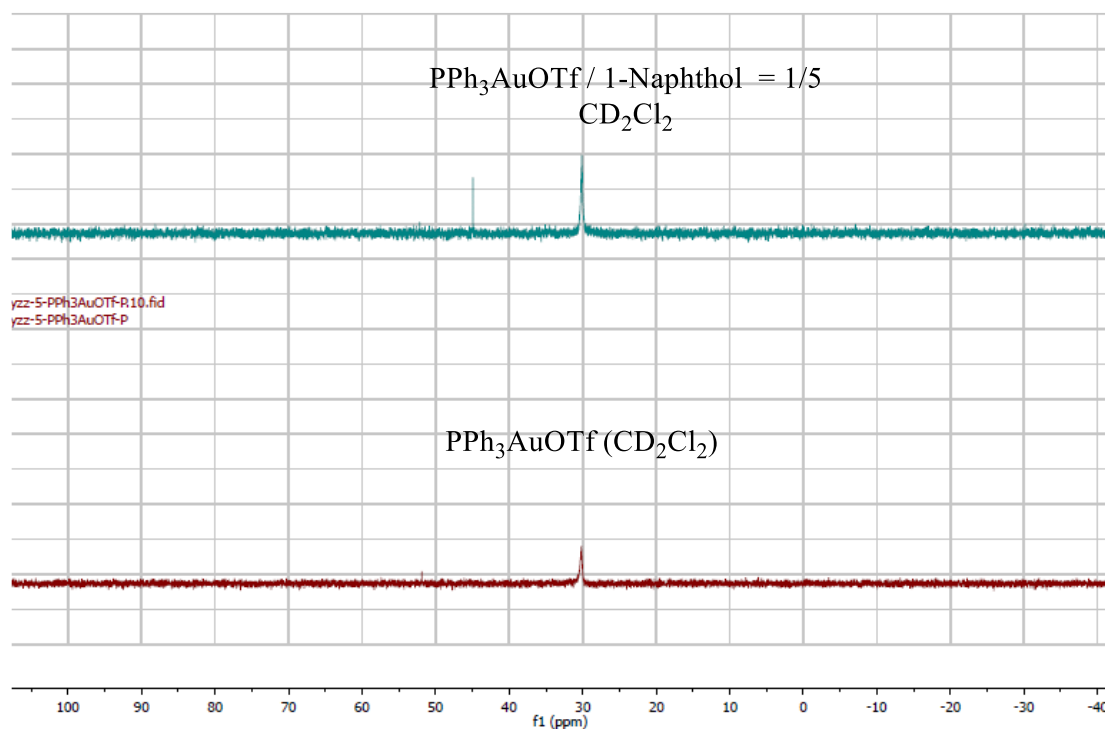

### Scheme 2 $^{31}\text{P}$ -NMR experiments

Meanwhile, NMR titration disclosed that no hydrogen bonding interaction was existed between naphthol and gold catalyst (scheme 3).

Allowing for the fact the tetrasubstituted boron compounds could undergo  $\text{S}_{\text{N}}2$  reaction (*Organometallics* **1998**, *17*, 4155; *J. Fluor. Chem.* **2014**, *168*, 111; *Inorg. Chem.* **2004**, *43*, 5789) and has certain lewis acidity (*Chem. Eur. J.* **2017**, *23*, 5219), we wanted to know whether the interaction between hydroxyl group and boron was the key for *ortho*-selectivity.  $^{19}\text{F}$ -NMR experiment shown that no new compound was generated when 1-naphthol,  $\text{IPrAuCl}$  and  $\text{NaBAR}_{\text{F}}$  were mixed. Meanwhile, the  $^{11}\text{B}$ -NMR experiment revealed that no coordination interaction between hydroxyl group and boron atom. Based on these results, the possibility that the *ortho*-selectivity stem from the interaction between hydroxyl group and boron atom could be excluded (scheme 6).

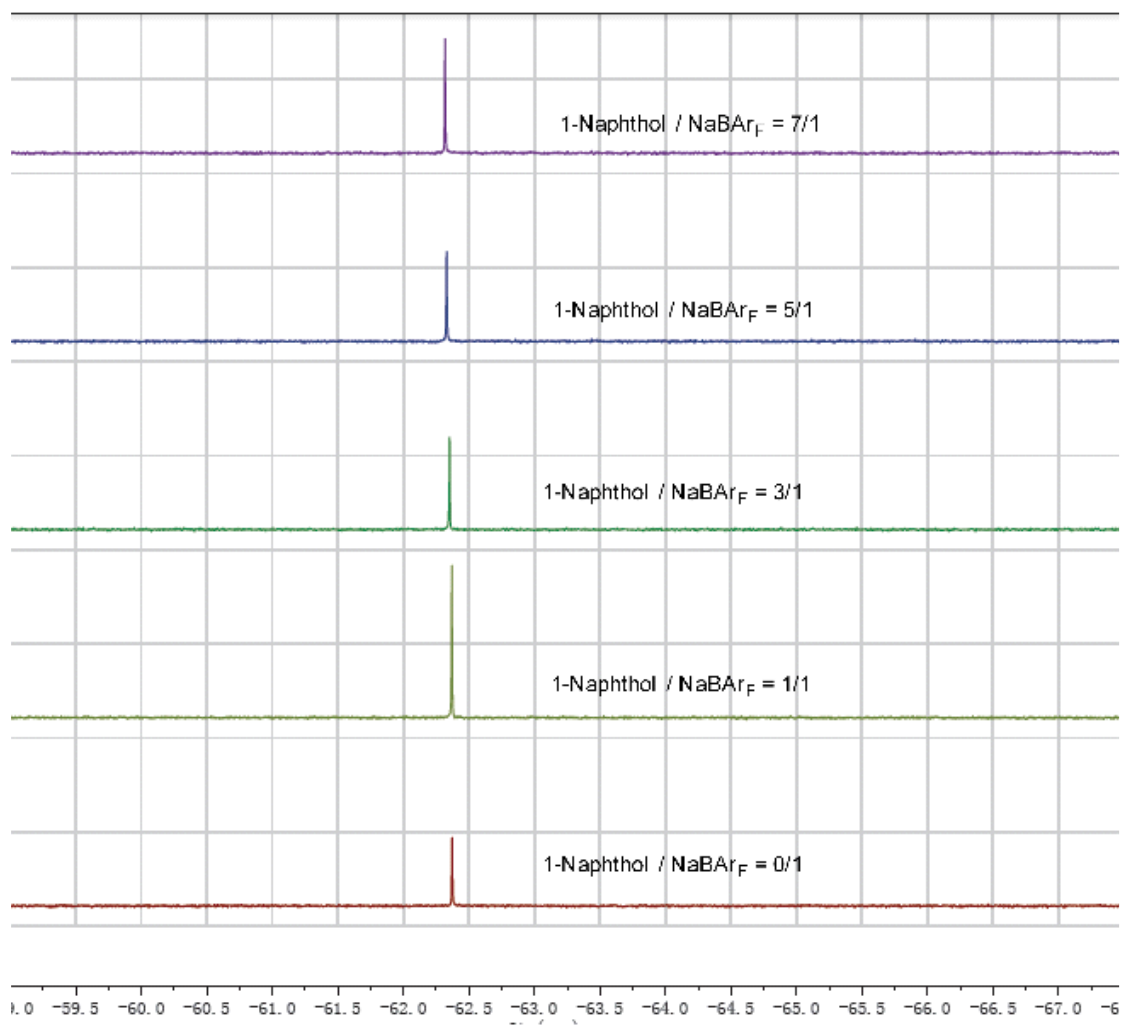

**Scheme 3. Titration experiments**

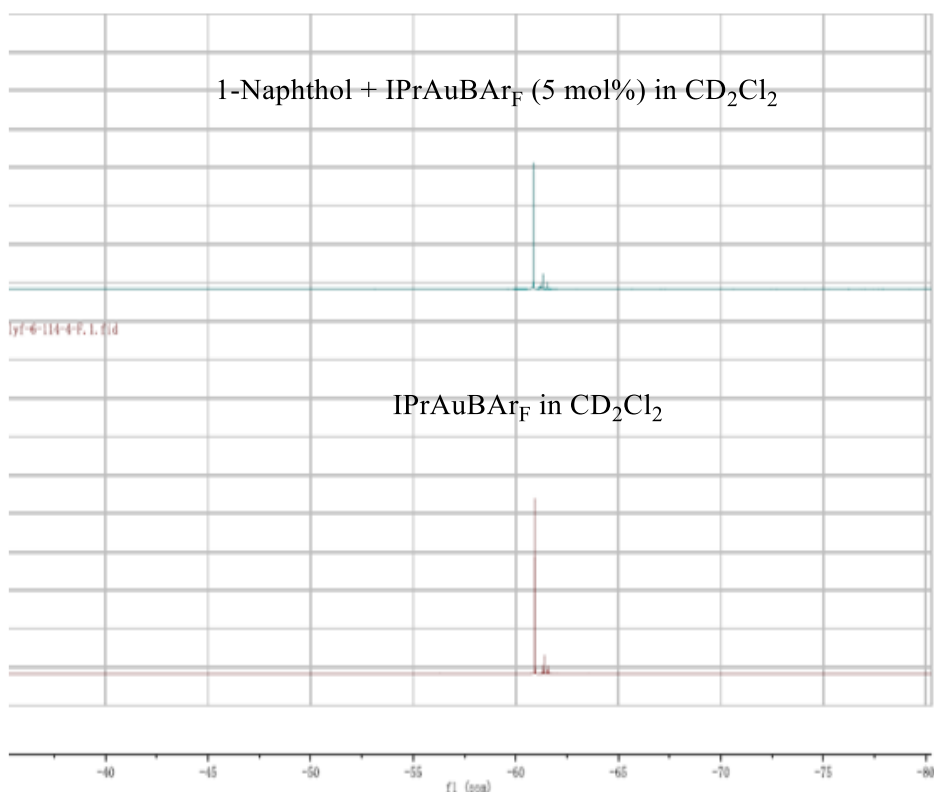

**Scheme 4. <sup>19</sup>F-NMR experiments**

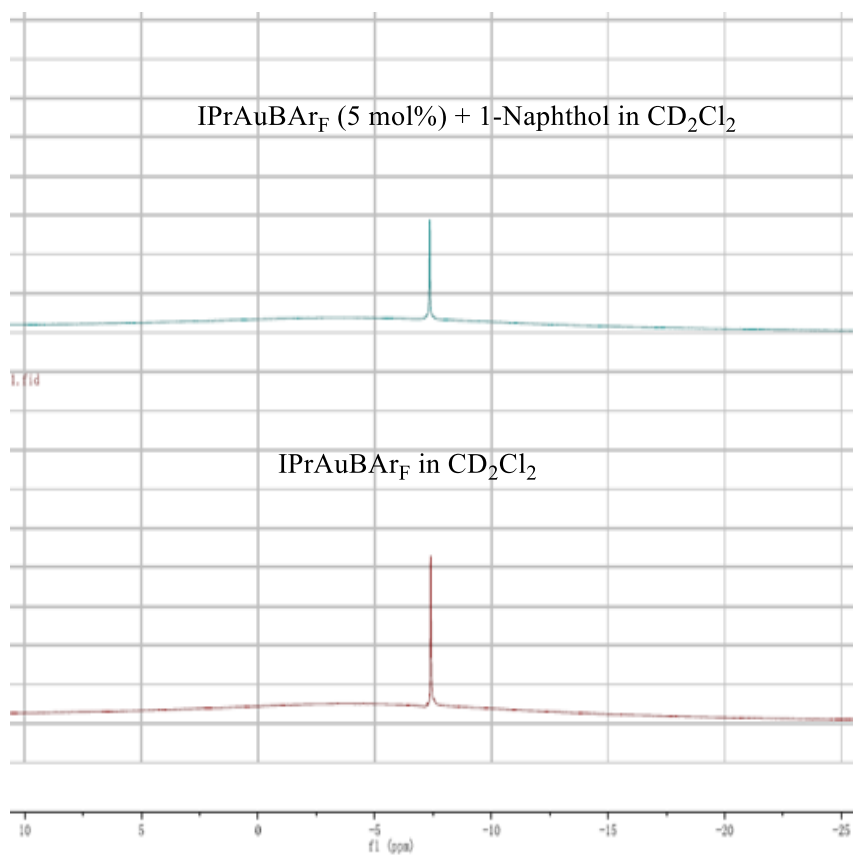

**Scheme 5. <sup>11</sup>B-NMR experiments**

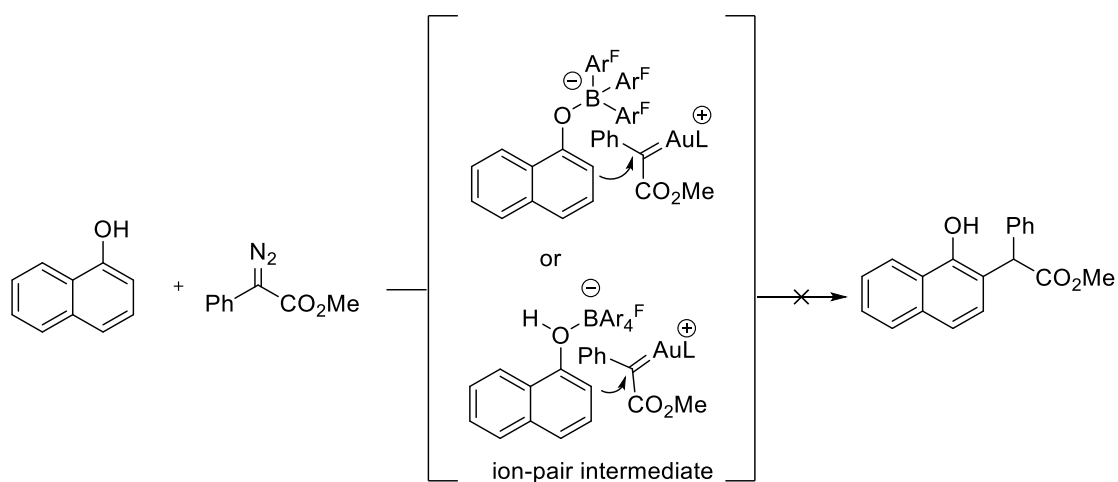

### Scheme 6. Impossible mechanism for *ortho*-selectivity

In order to confirm our conclusion that the *ortho* C-H bond functionalization is an intramolecular reaction and *para* C-H bond functionalization is an intermolecular reaction, we performed the reactions under different concentration. As we know that the low concentration is good for the intramolecular reaction while high concentration would facilitate the intermolecular reaction. Thus, the *para* C-H bond functionalization product should become more with increasing of concentration under standard conditions. To my excitement, the reactions were indeed proceeded as our expectation (scheme 7).

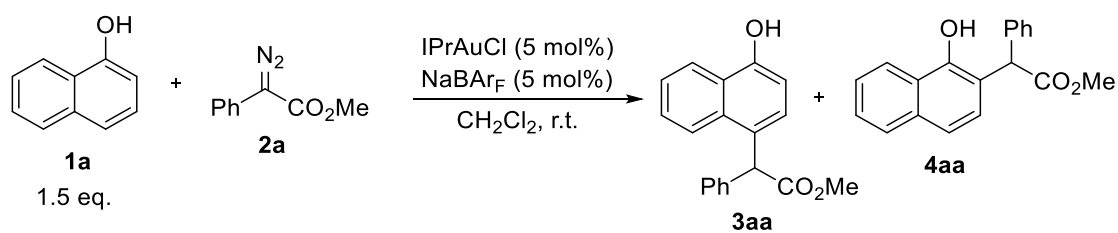

| Concentration (mol/L) | 4aa/3aa |
|-----------------------|---------|
| 0.02                  | 7.9:1   |
| 0.04                  | 7.3:1   |
| 0.08                  | 6.7:1   |
| 0.2                   | 3.2:1   |
| 1                     | 1.4:1   |

### Scheme 7. Concentration experiments

Based on above results, we could conclude that the coordination between hydroxyl

group and gold was the key for the *ortho*-selectivity. The proposed mechanism was illustrated as following (scheme 8).

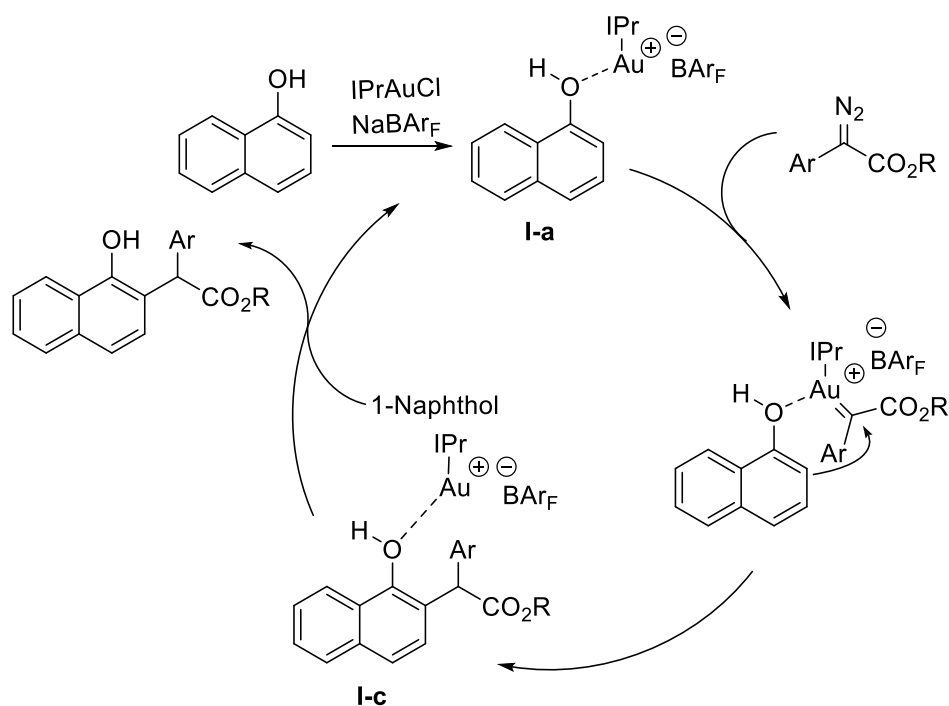

**Scheme 8. Proposed mechanism for *ortho*-selectivity**

Besides, related deuterium labeling experiments were also conducted to get more insights into mechanism (scheme 9). The results indicated that the reaction did not proceed via a [1,2]-H shift but a possible water assisted hydrogen. The results of control experiments also demonstrated that no enolization took place in our reaction.

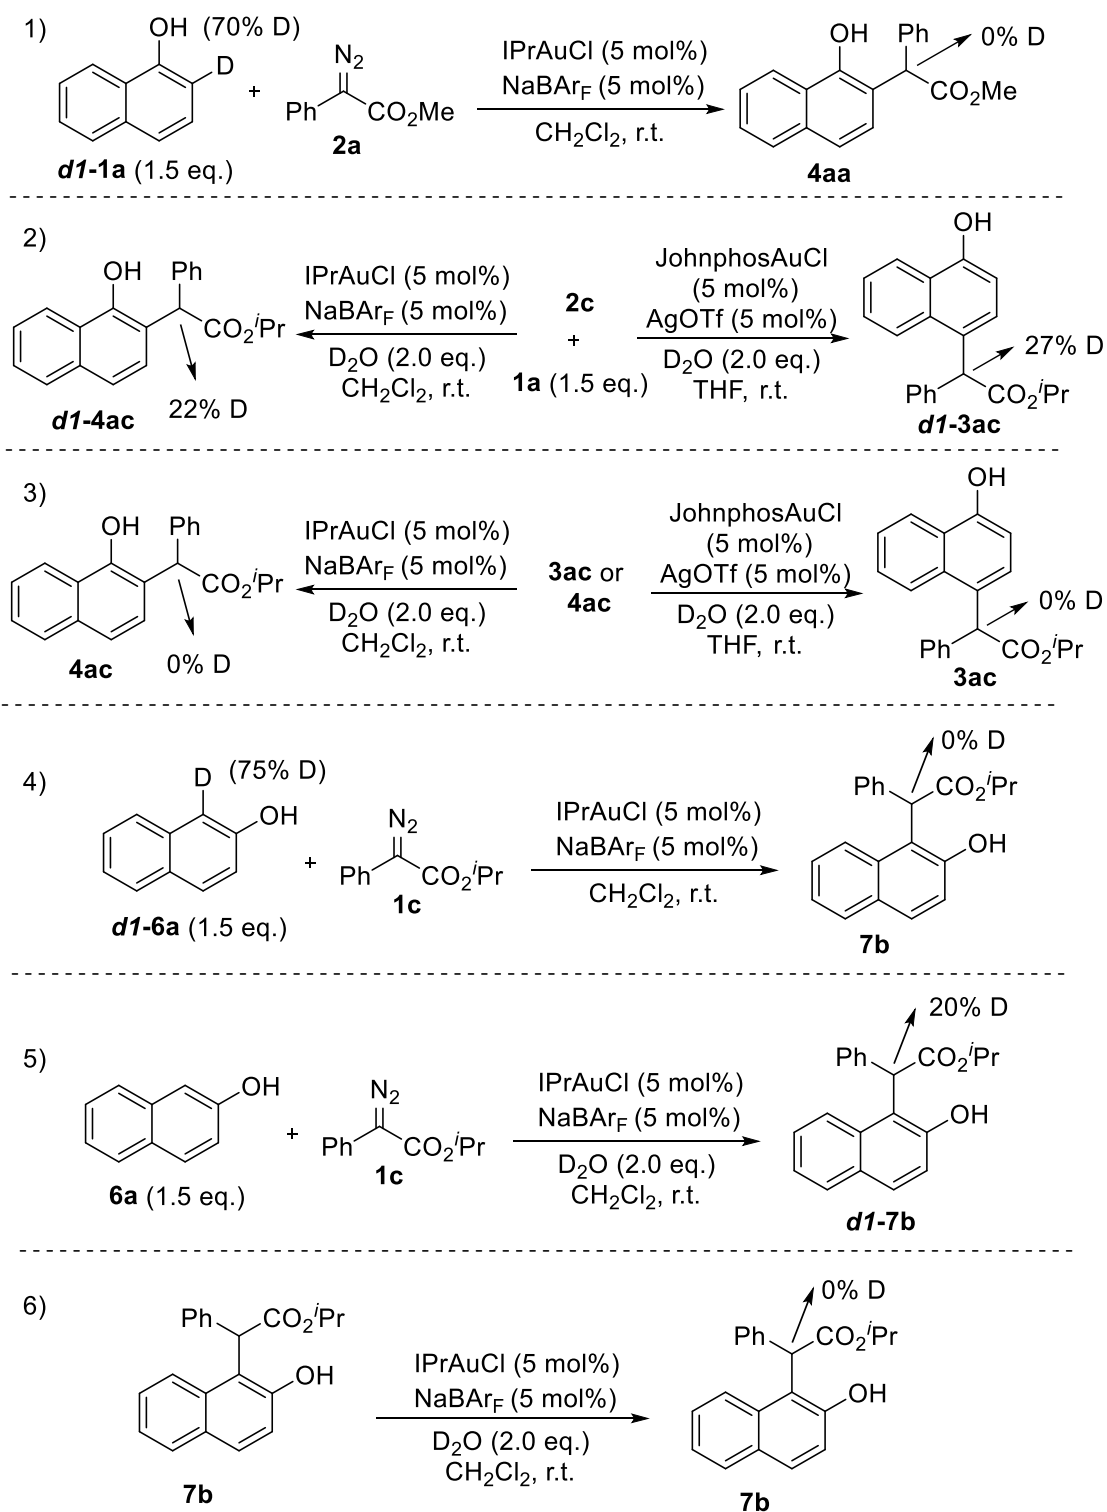

**Scheme 9. Deuterium labeling experiments**

Finally, we studied the silver effect, the results disclosed that no silver effect in para C-H bond functionalization (scheme 10).

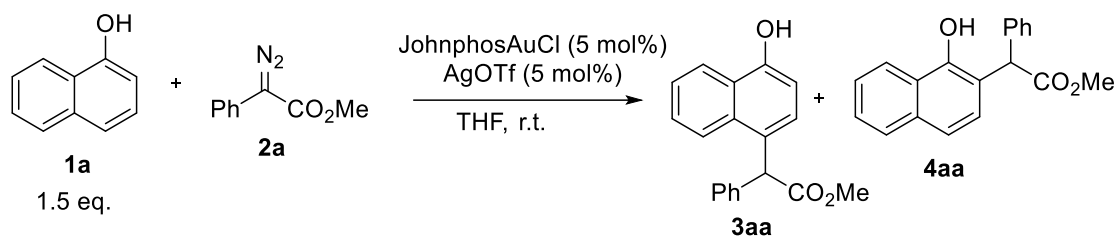

- 1) with AgCl in reaction system, **3aa** (90% NMR yield) , **4aa** (0% NMR yield)  
 2) without AgCl in reaction system, **3aa** (86% NMR yield) , **4aa** (0% NMR yield)

### Scheme 10. Silver effect studies

## 7. X-ray crystal data for 3ah, 4al, 7i and 9

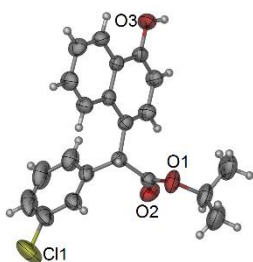

**3ah**

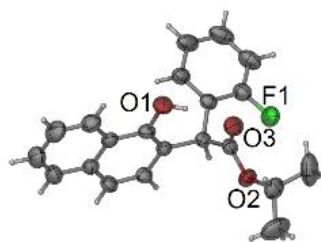

**4al**

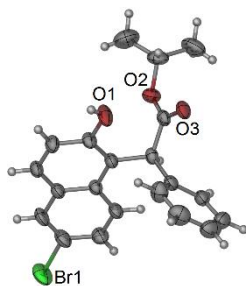

**7i**

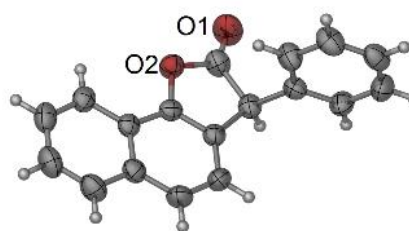

**9**

## 8. NMR Spectra of new compounds



YZZ-14-

8.2480  
8.2292  
7.9301  
7.910  
7.511  
7.507  
7.491  
7.486  
7.482  
7.465  
7.352  
7.350  
7.336  
7.324  
7.321  
7.311  
7.307  
7.070  
7.050  
6.582  
6.563  
6.137  
5.734

3.790

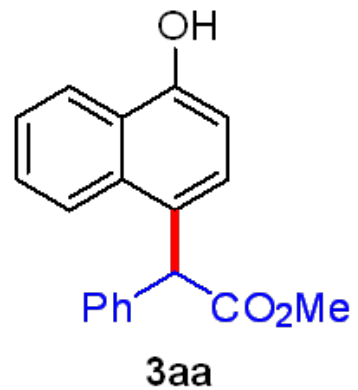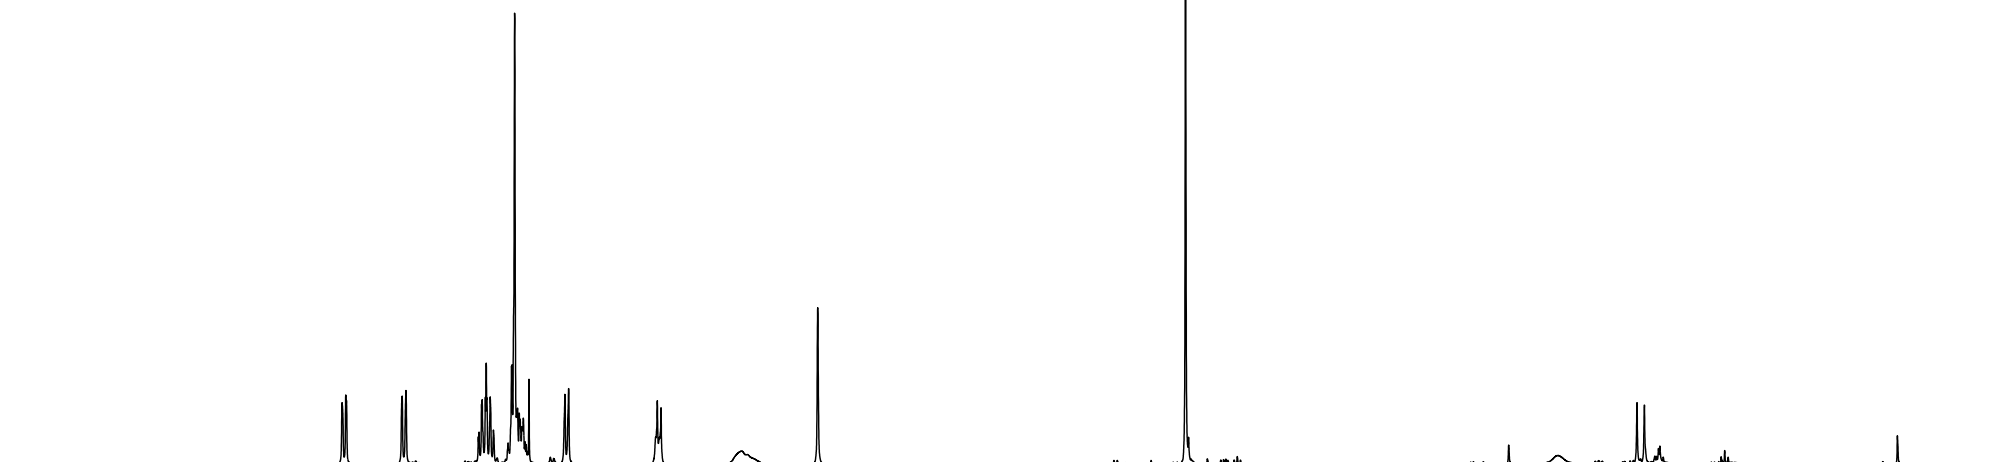

9

8

7

6

5

4

3

2

1

0 ppm

1.01

1.01

2.07

5.01

1.01

1.02

0.97

1.00

3.00

yzz-14-052-1-c

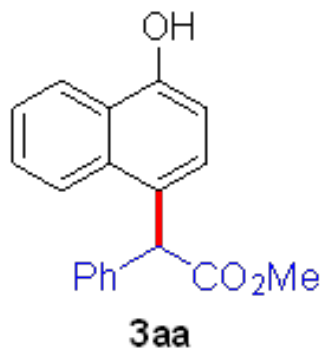

174.14

151.45  
138.02  
132.61  
128.91  
128.64  
127.33  
126.99  
126.56  
126.39  
124.95  
124.91  
122.89  
122.67  
107.93

77.32  
77.00  
76.68

53.17  
52.58

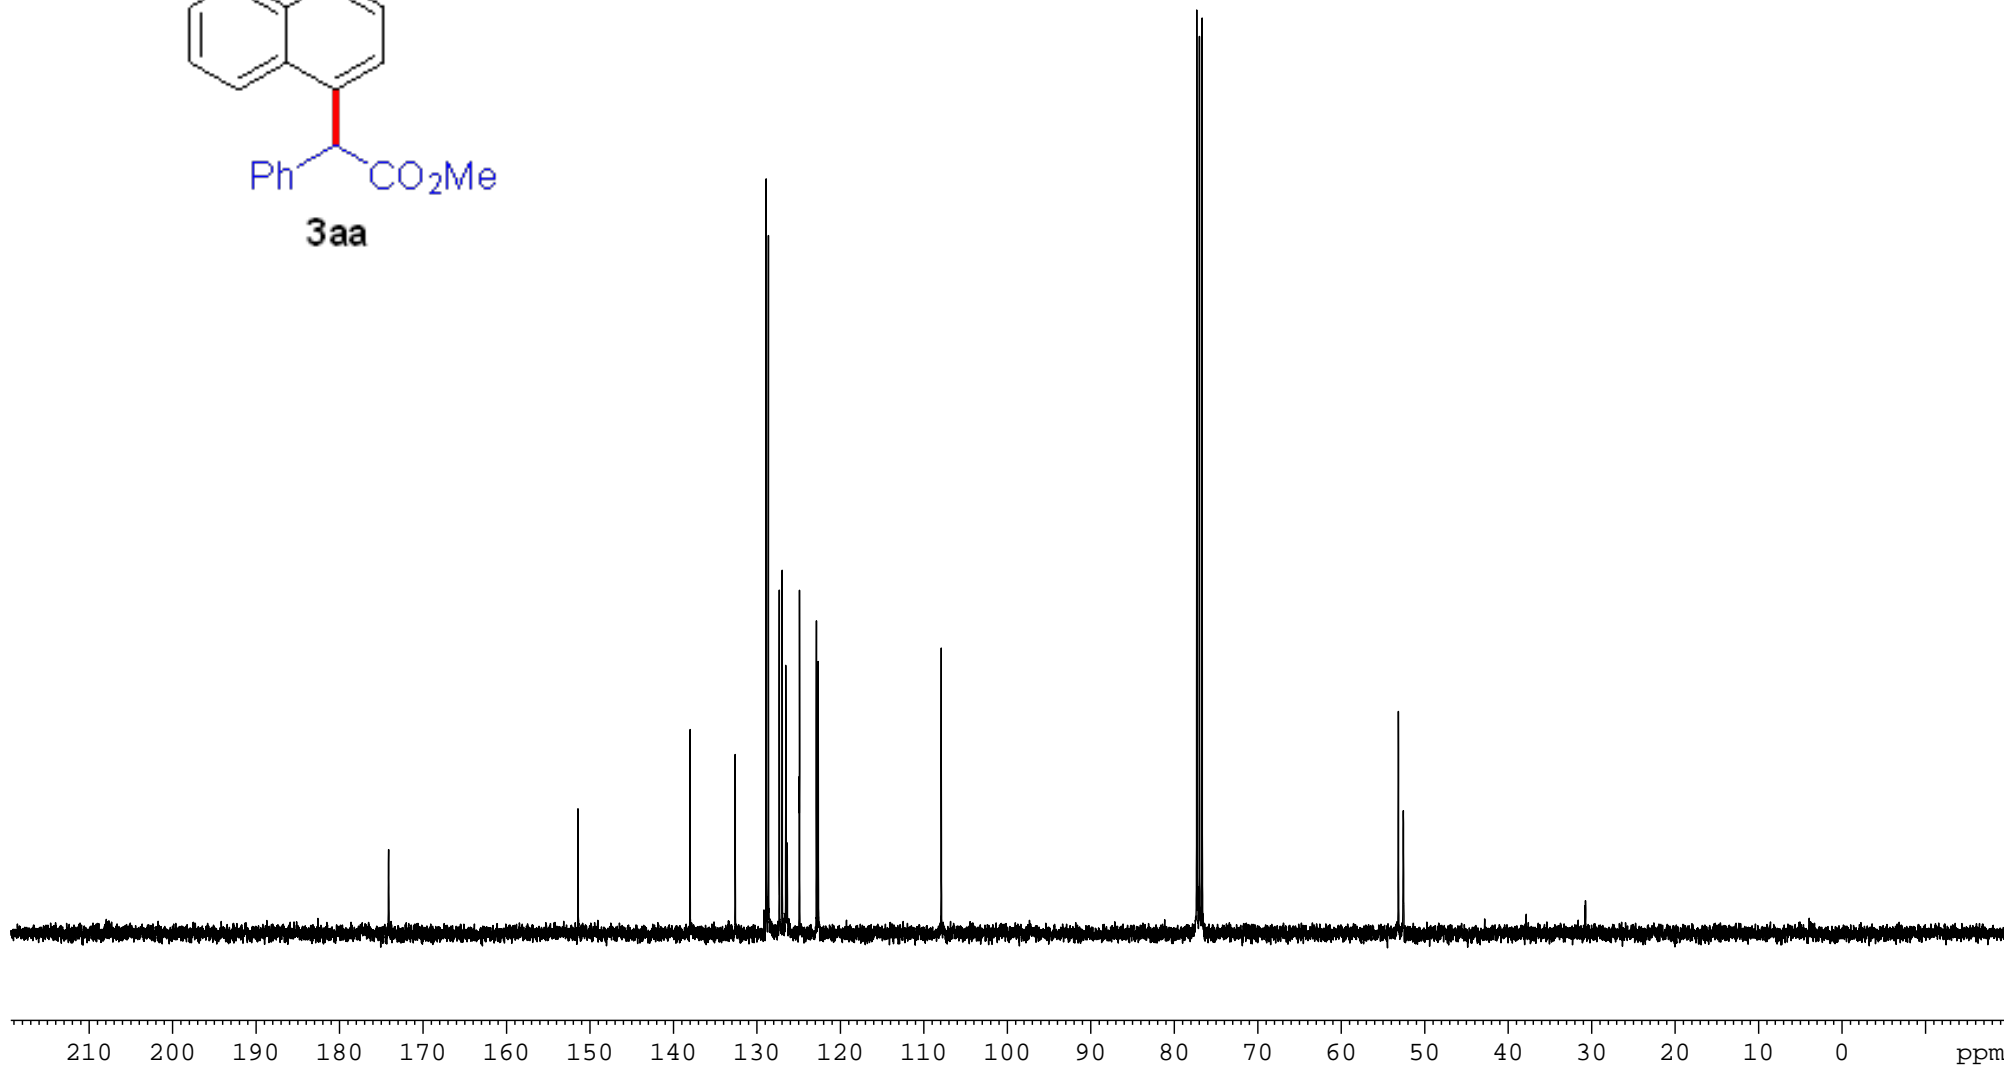

8.242  
8.240  
8.222  
8.219  
7.950  
7.930  
7.508  
7.504  
7.487  
7.483  
7.479  
7.476  
7.459  
7.456  
7.352  
7.342  
7.299  
7.288  
7.260  
7.060  
7.040  
6.547  
6.527  
6.214  
5.713

4.287  
4.273  
4.269  
4.255

1.291  
1.273  
1.255

yzz-14-053-1

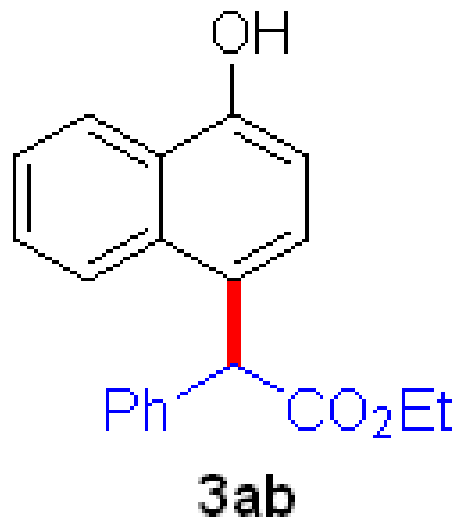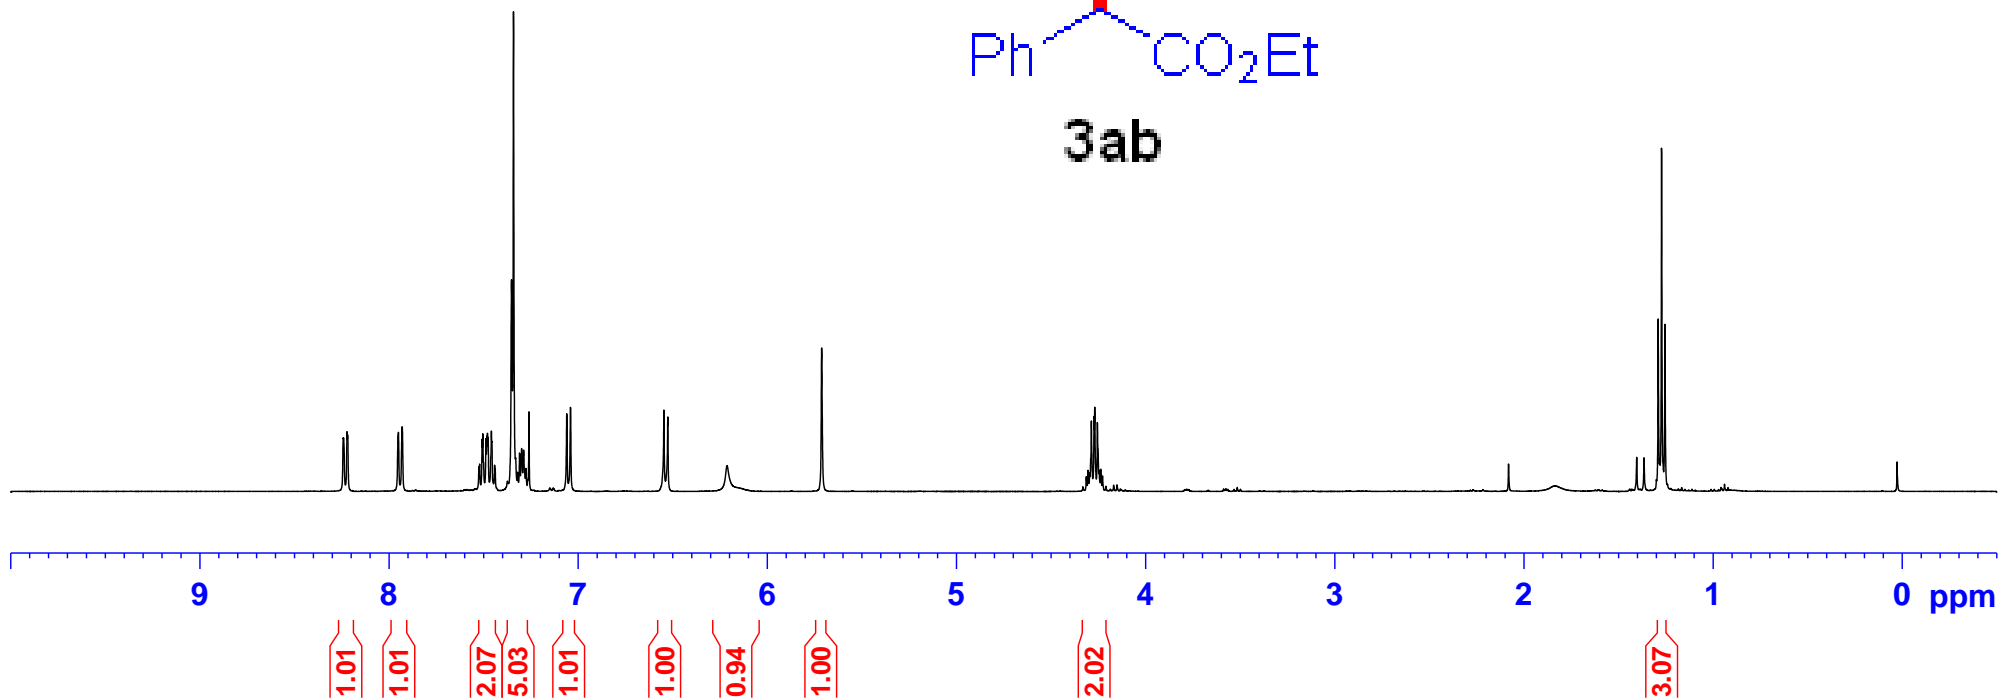

yzz-14-053-1-c

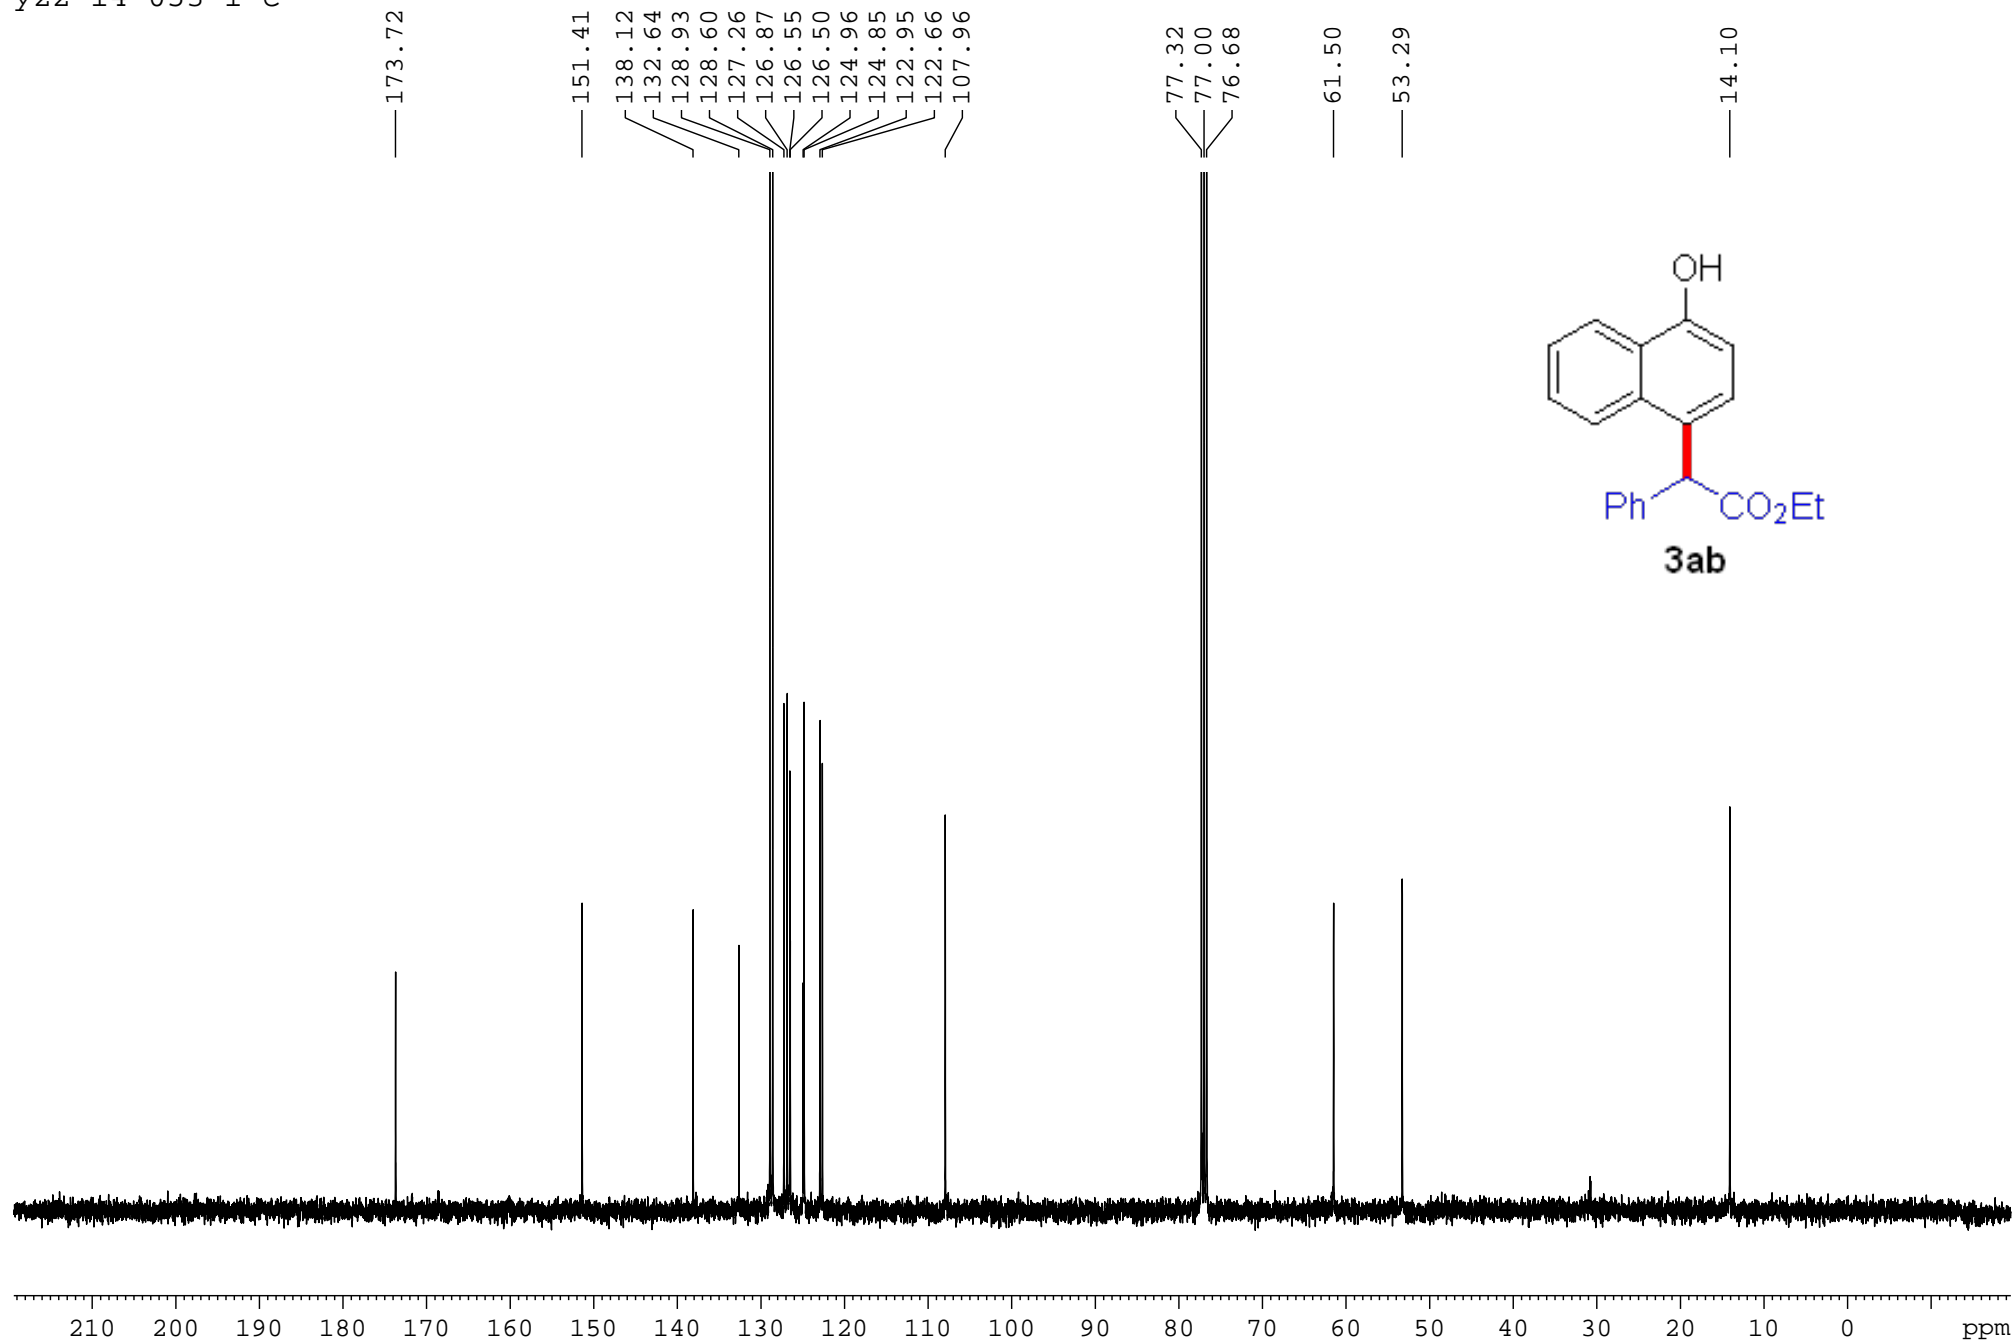

8.227  
8.207  
8.204  
7.955  
7.935  
7.520  
7.517  
7.503  
7.500  
7.483  
7.478  
7.457  
7.440  
7.345  
7.336  
7.304  
7.293  
7.282  
7.260  
7.036  
7.017  
6.535  
6.515  
5.930  
5.914  
5.662  
5.176  
5.160  
5.144  
5.129  
5.113

1.266  
1.250  
1.239  
1.223

yzz-14-054-2

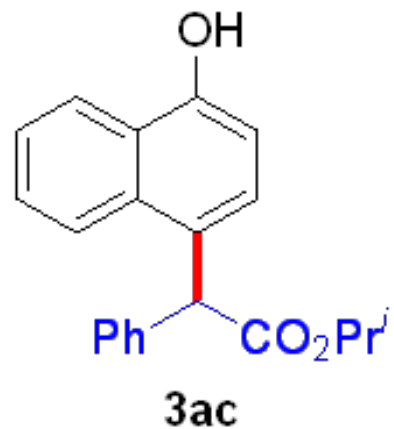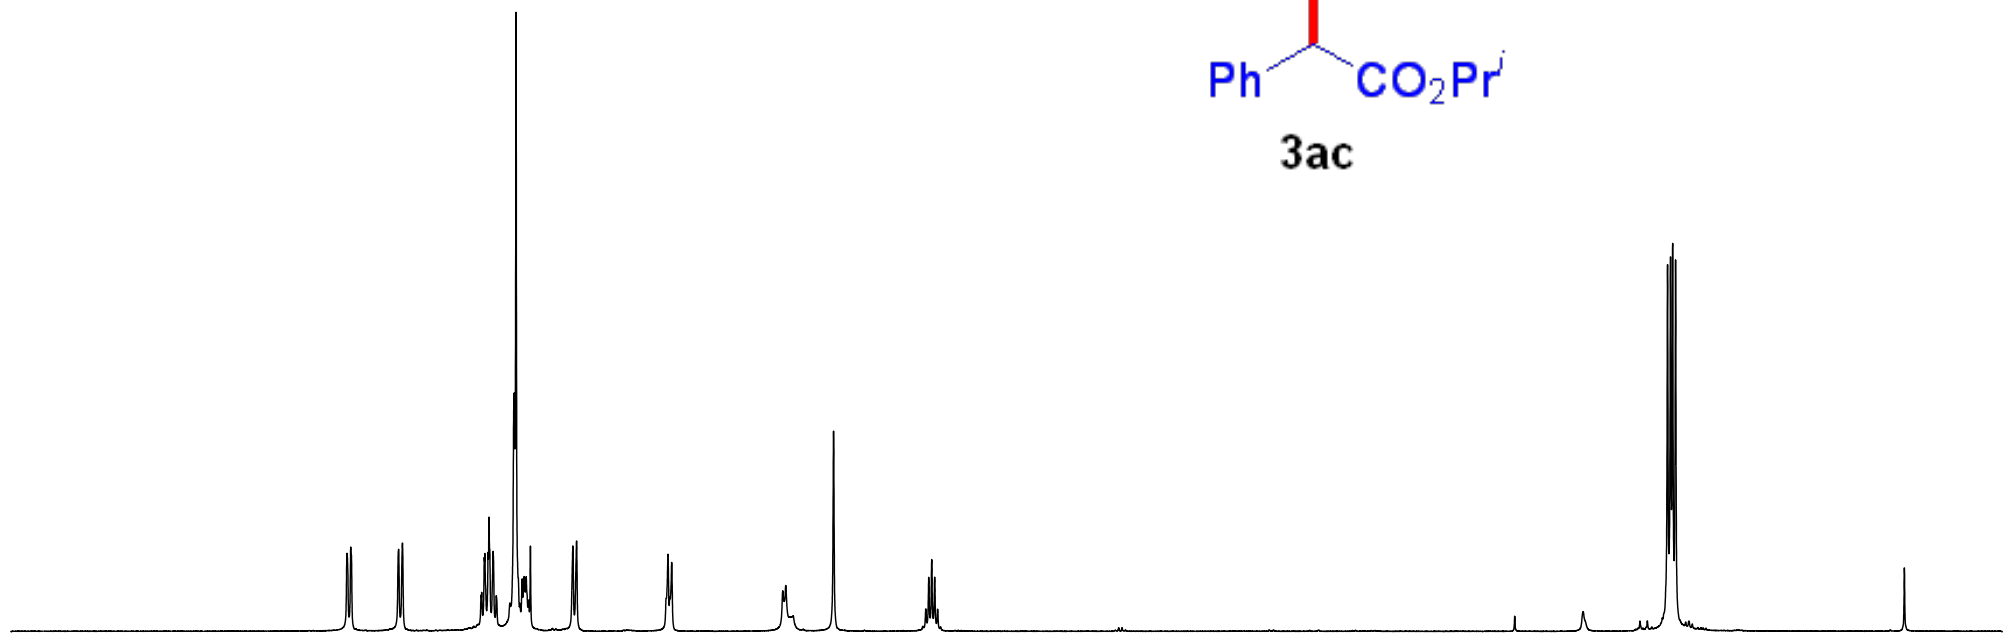

9.5 9.0 8.5 8.0 7.5 7.0 6.5 6.0 5.5 5.0 4.5 4.0 3.5 3.0 2.5 2.0 1.5 1.0 0.5 ppm

1.07 1.05 2.01 5.02 1.07 1.05 1.01 1.00 1.03 3.04 3.02

yzz-14-054-1-c

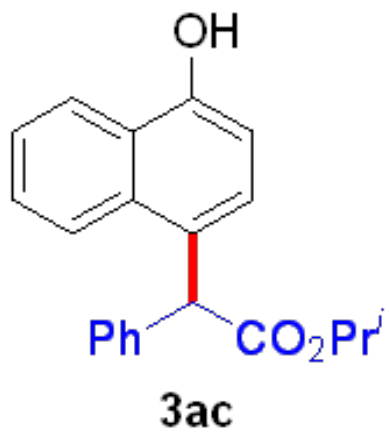

151.29  
138.22  
132.71  
128.94  
128.57  
127.20  
126.81  
126.51  
124.84  
123.05  
122.61  
107.98

77.32  
77.00  
76.68  
68.93

53.47

21.64

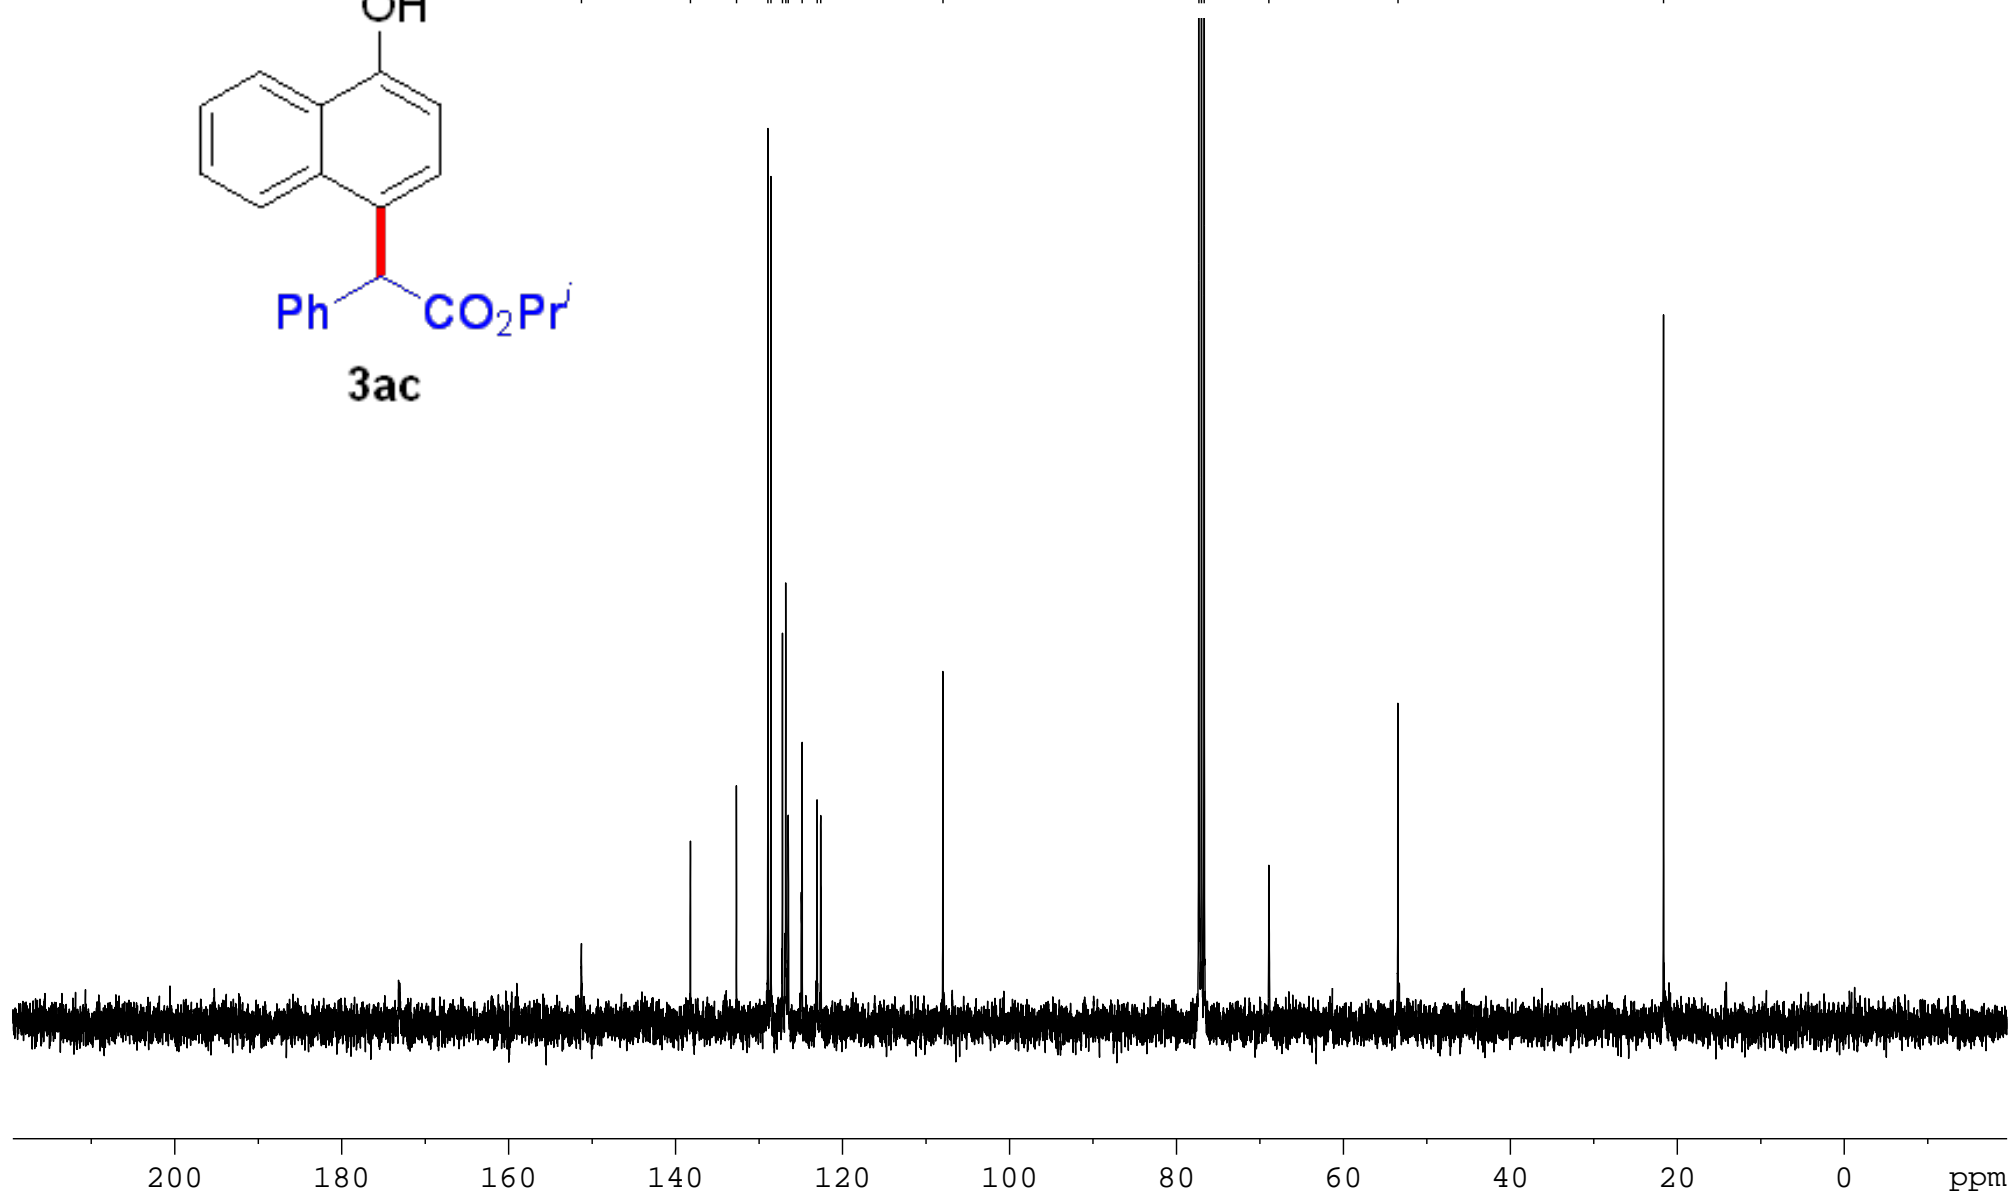

YNZ-14  
8.2244  
8.2032  
8.1955  
7.9779  
7.9499  
7.507  
7.503  
7.486  
7.482  
7.474  
7.471  
7.453  
7.353  
7.346  
7.338  
7.325  
7.304  
7.298  
7.287  
7.283  
6.987  
6.967  
6.498  
6.478  
6.019  
5.600

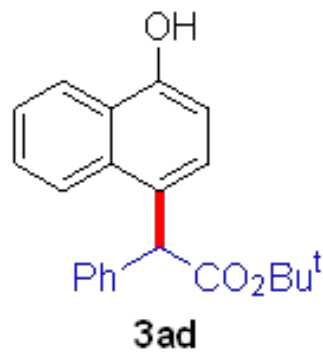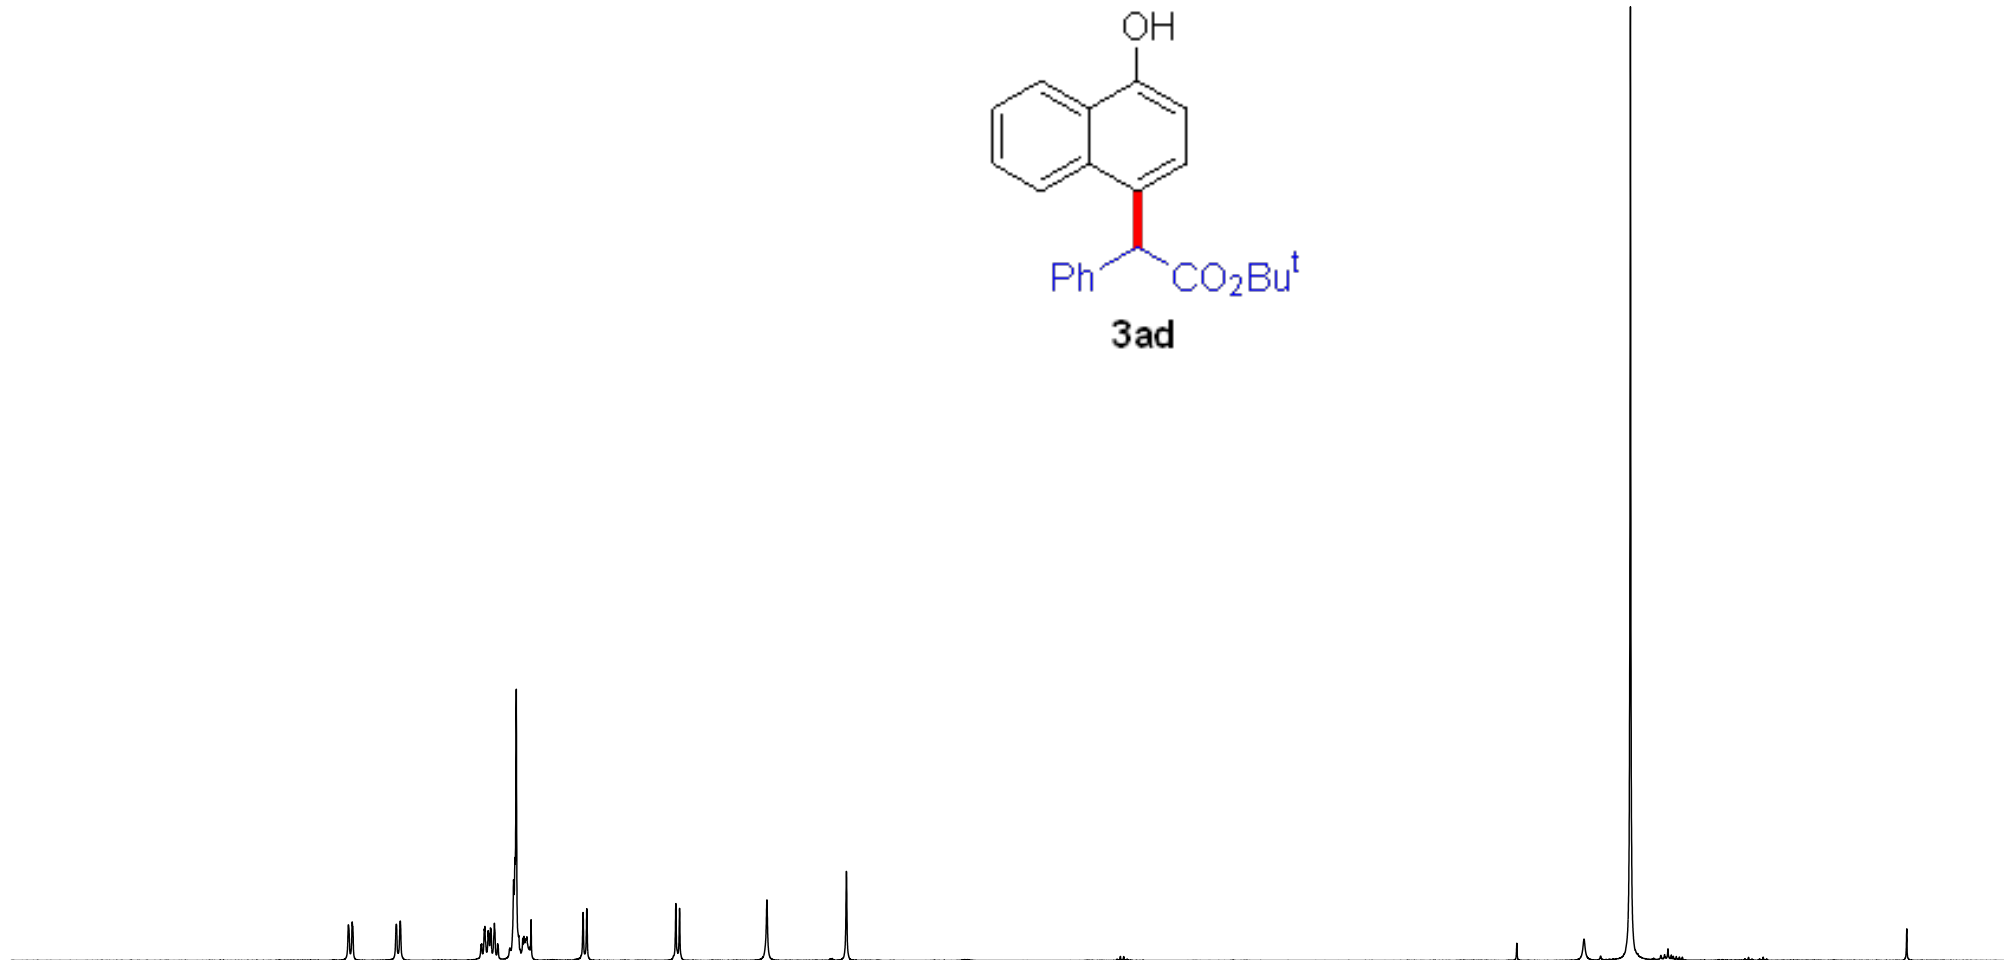

1.473

9.06

9.5 9.0 8.5 8.0 7.5 7.0 6.5 6.0 5.5 5.0 4.5 4.0 3.5 3.0 2.5 2.0 1.5 1.0 0.5 ppm

1.03  
1.05  
2.02  
5.08  
1.01  
1.03  
1.03  
1.00

yzz-14-055-1-c

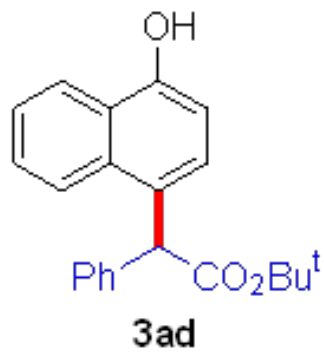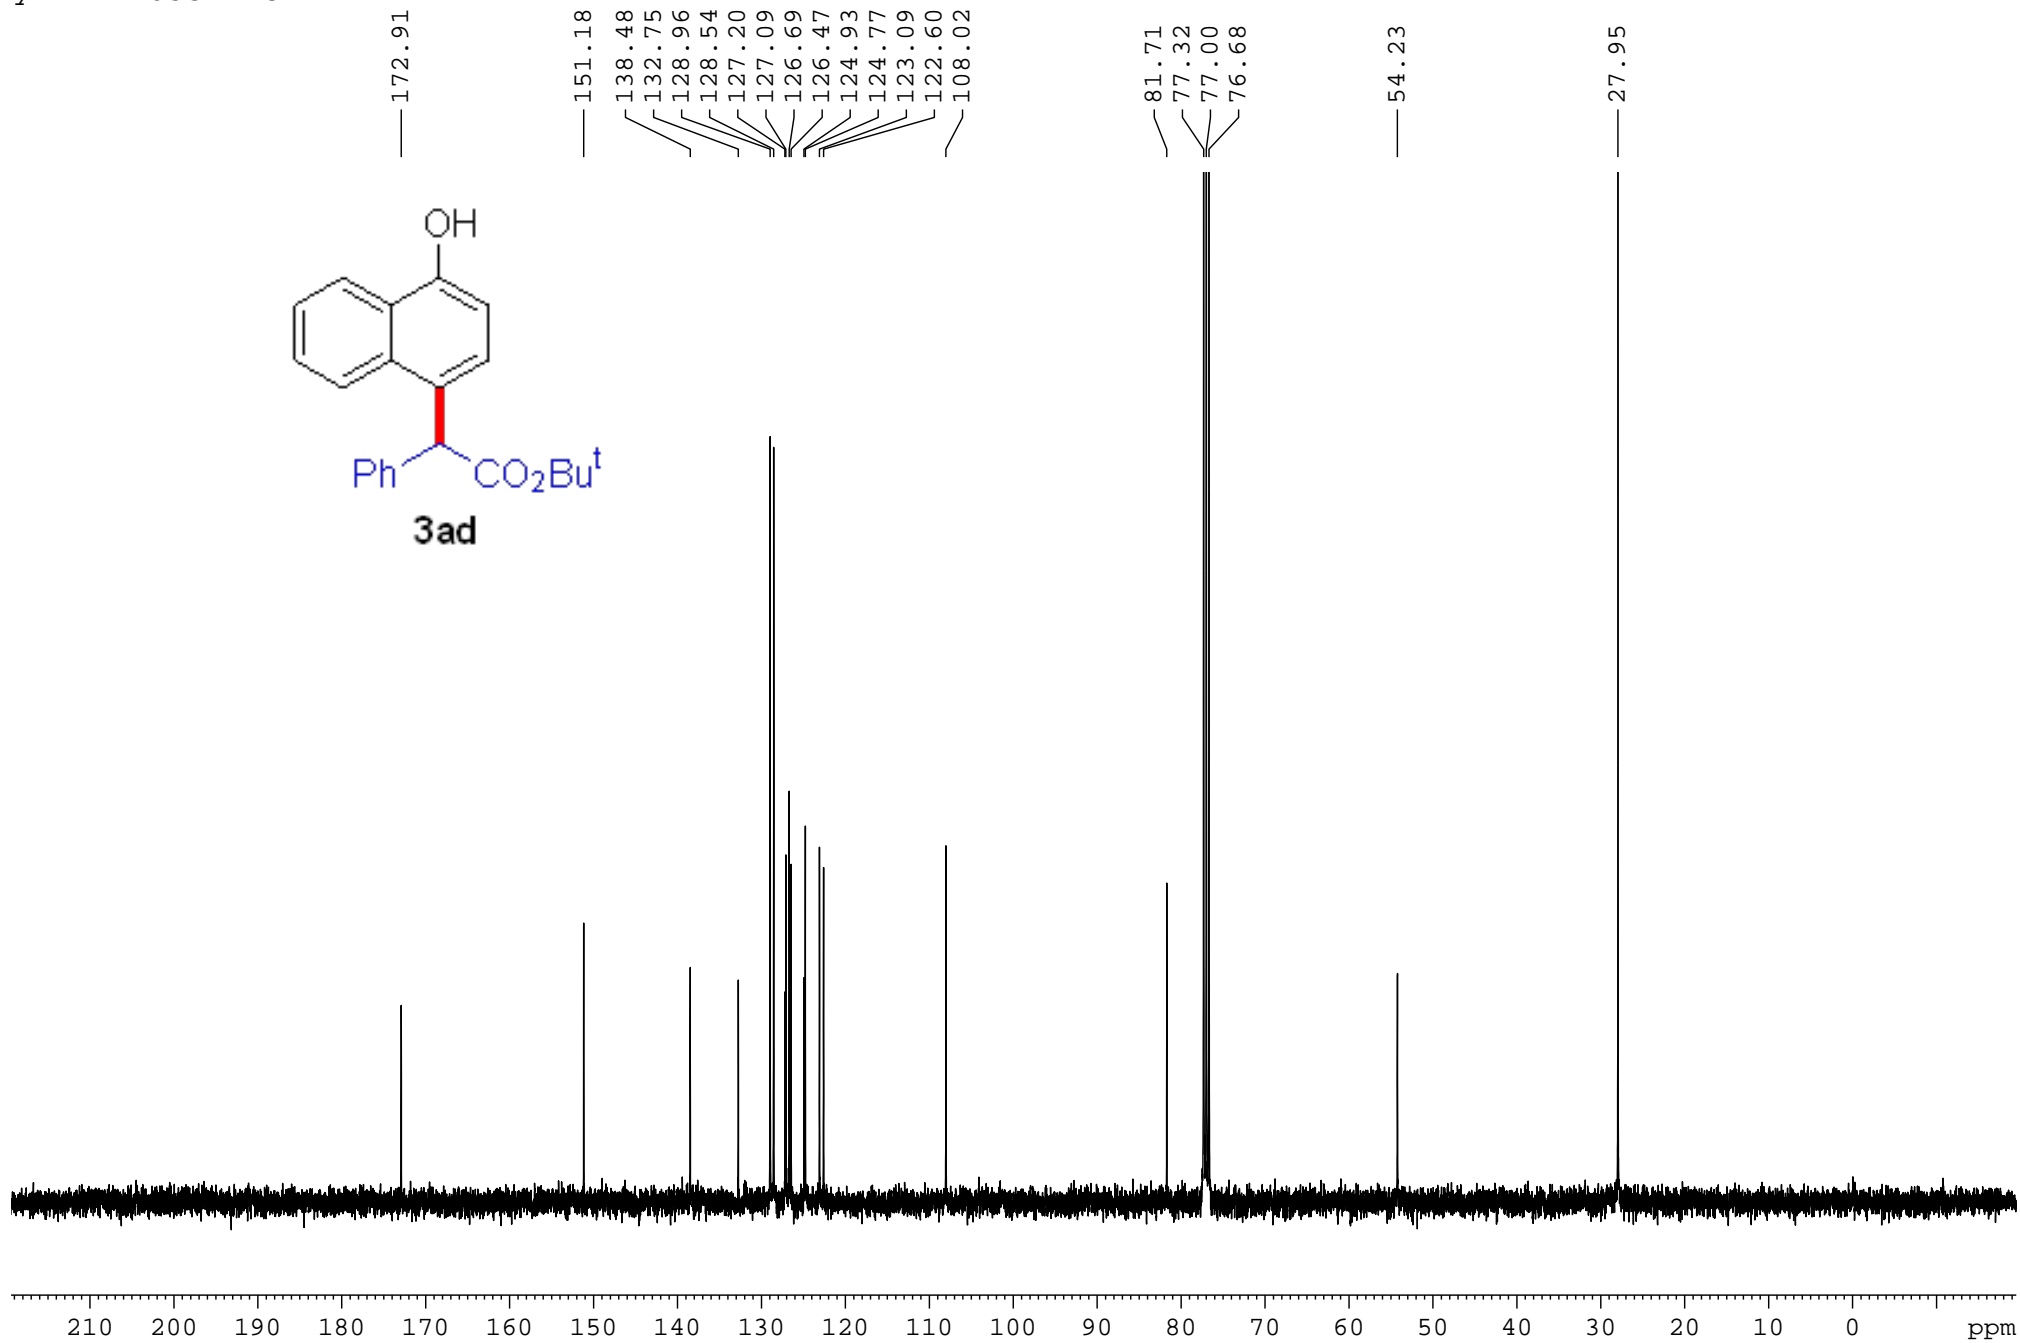



8.217  
8.198  
8.194  
7.871  
7.869  
7.849  
7.500  
7.496  
7.483  
7.479  
7.464  
7.459  
7.443  
7.426  
7.299  
7.278  
7.249  
7.242  
7.228  
7.012  
6.993  
6.521  
6.502  
6.193  
5.605  
5.158  
5.143  
5.127  
5.112  
5.096

1.242  
1.232  
1.227  
1.216

yzz-14-058-1

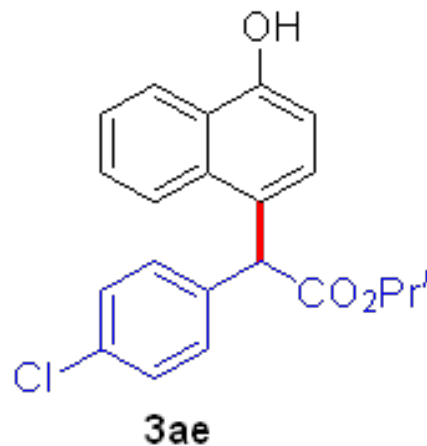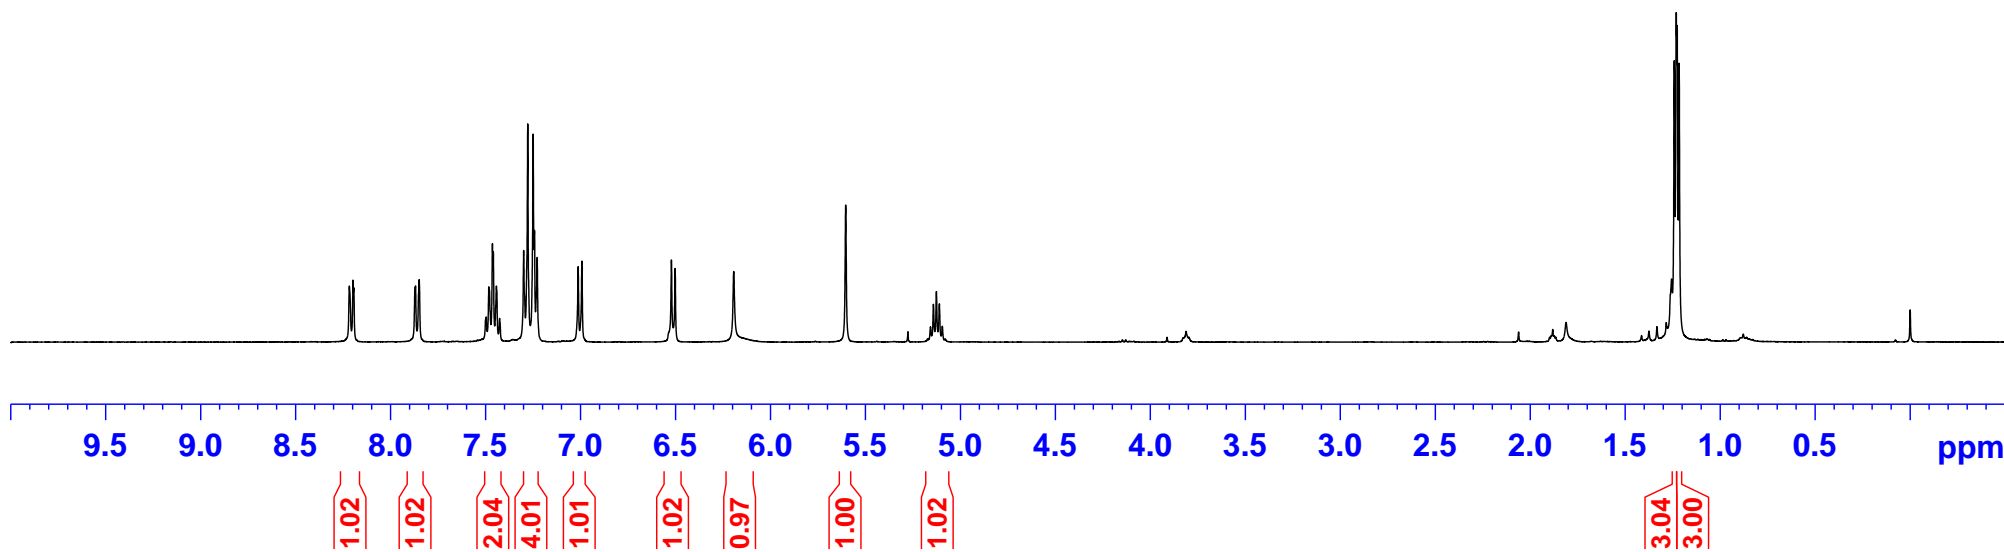

yzz-14-058-1-c

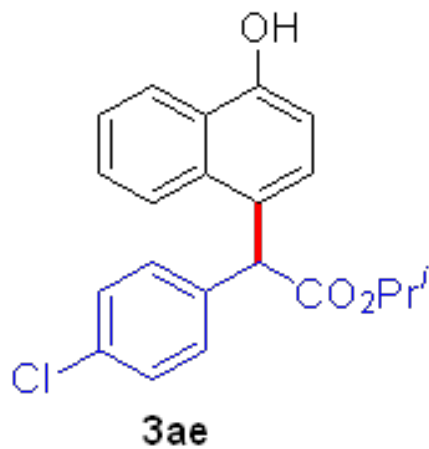

— 172.89

— 151.51

136.75

133.12

132.53

130.28

128.73

126.92

126.33

126.16

124.99

124.96

122.91

122.69

107.89

77.31

77.00

76.68

69.21

— 52.86

21.63

21.60

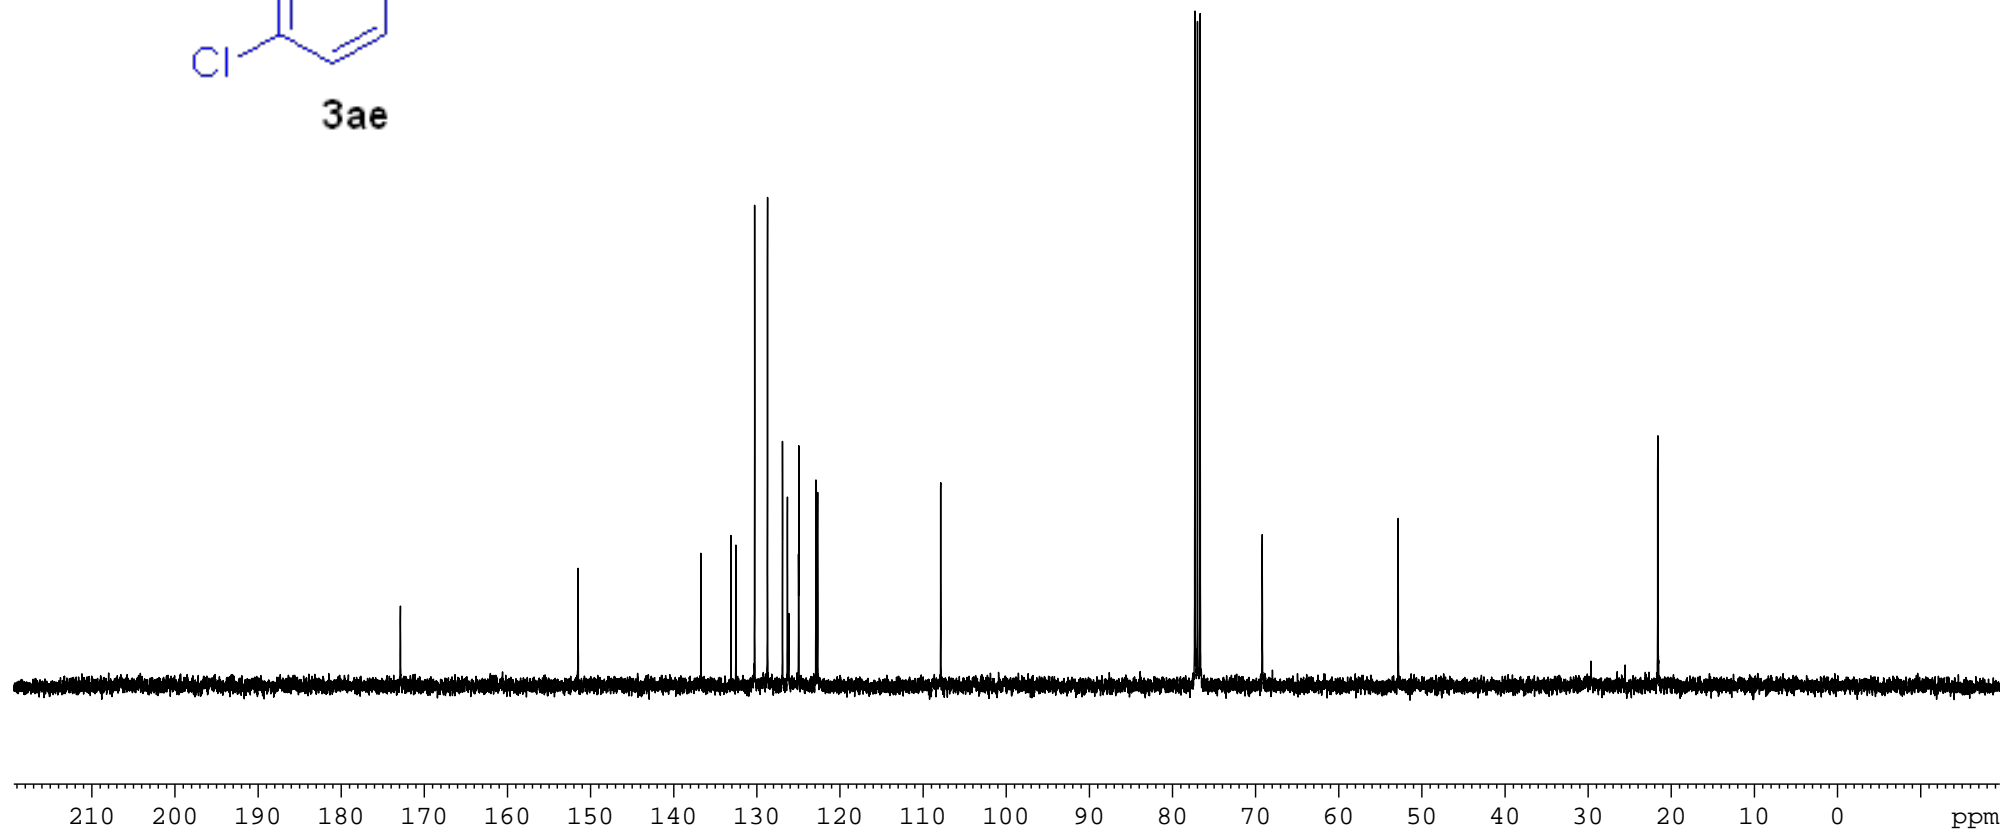

YZZ-14-067-1

8.232  
8.230  
8.227  
8.213  
8.208  
7.883  
7.863  
7.518  
7.514  
7.501  
7.497  
7.482  
7.478  
7.467  
7.463  
7.450  
7.446  
7.260  
7.210  
7.189  
7.031  
7.012  
6.544  
6.524  
6.097  
5.604  
5.173  
5.158  
5.142  
5.126  
5.111

1.258  
1.249  
1.243  
1.233

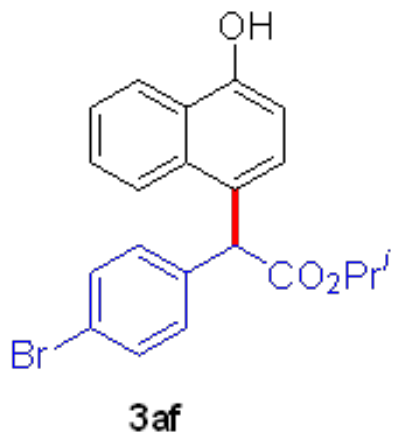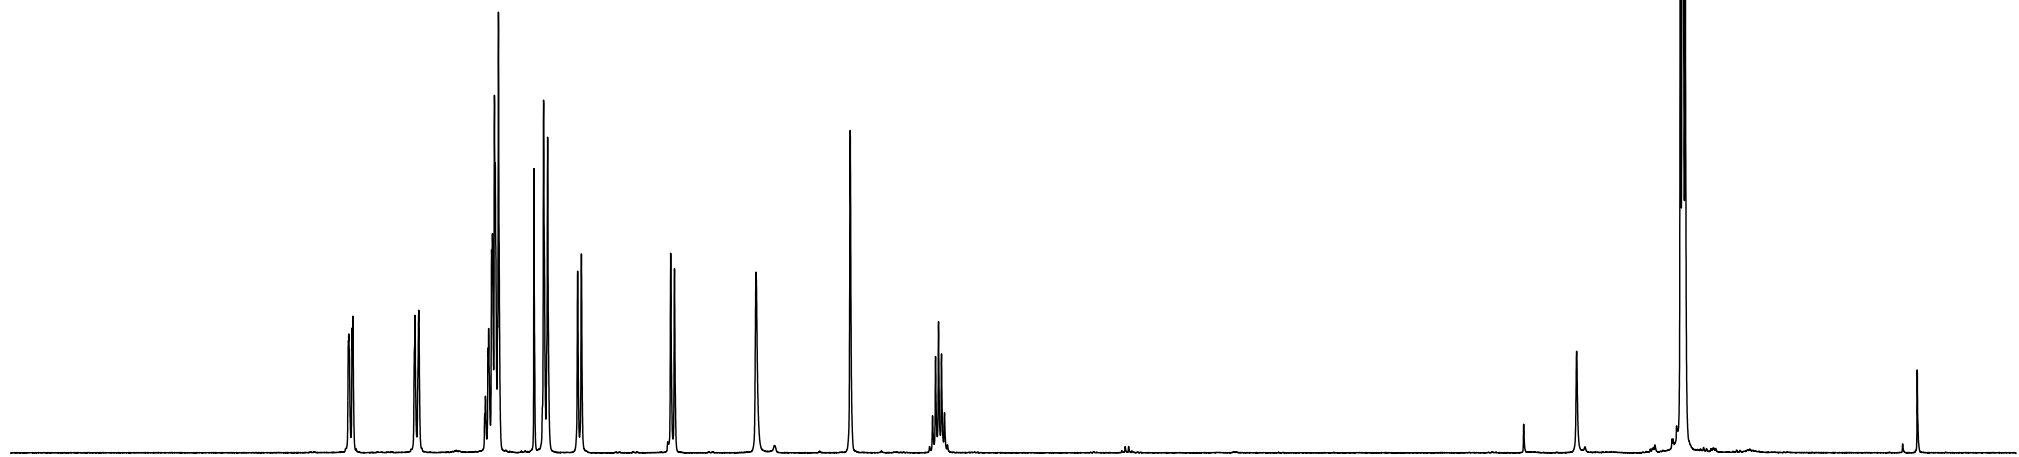

9.5 9.0 8.5 8.0 7.5 7.0 6.5 6.0 5.5 5.0 4.5 4.0 3.5 3.0 2.5 2.0 1.5 1.0 0.5 ppm

1.00 1.00 4.03 2.00 1.01 1.01 0.95 1.00 1.01 6.09

yzz-14-067-1-c

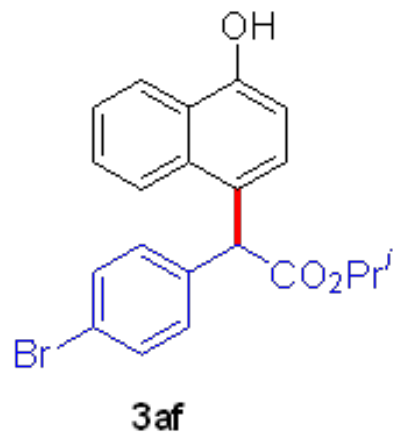

— 172.80  
— 151.48  
137.27  
132.52  
131.68  
130.64  
126.94  
126.35  
126.11  
124.98  
122.90  
122.69  
121.28  
— 107.90

77.32  
77.00  
76.68  
— 69.23

— 52.93

21.64  
21.61

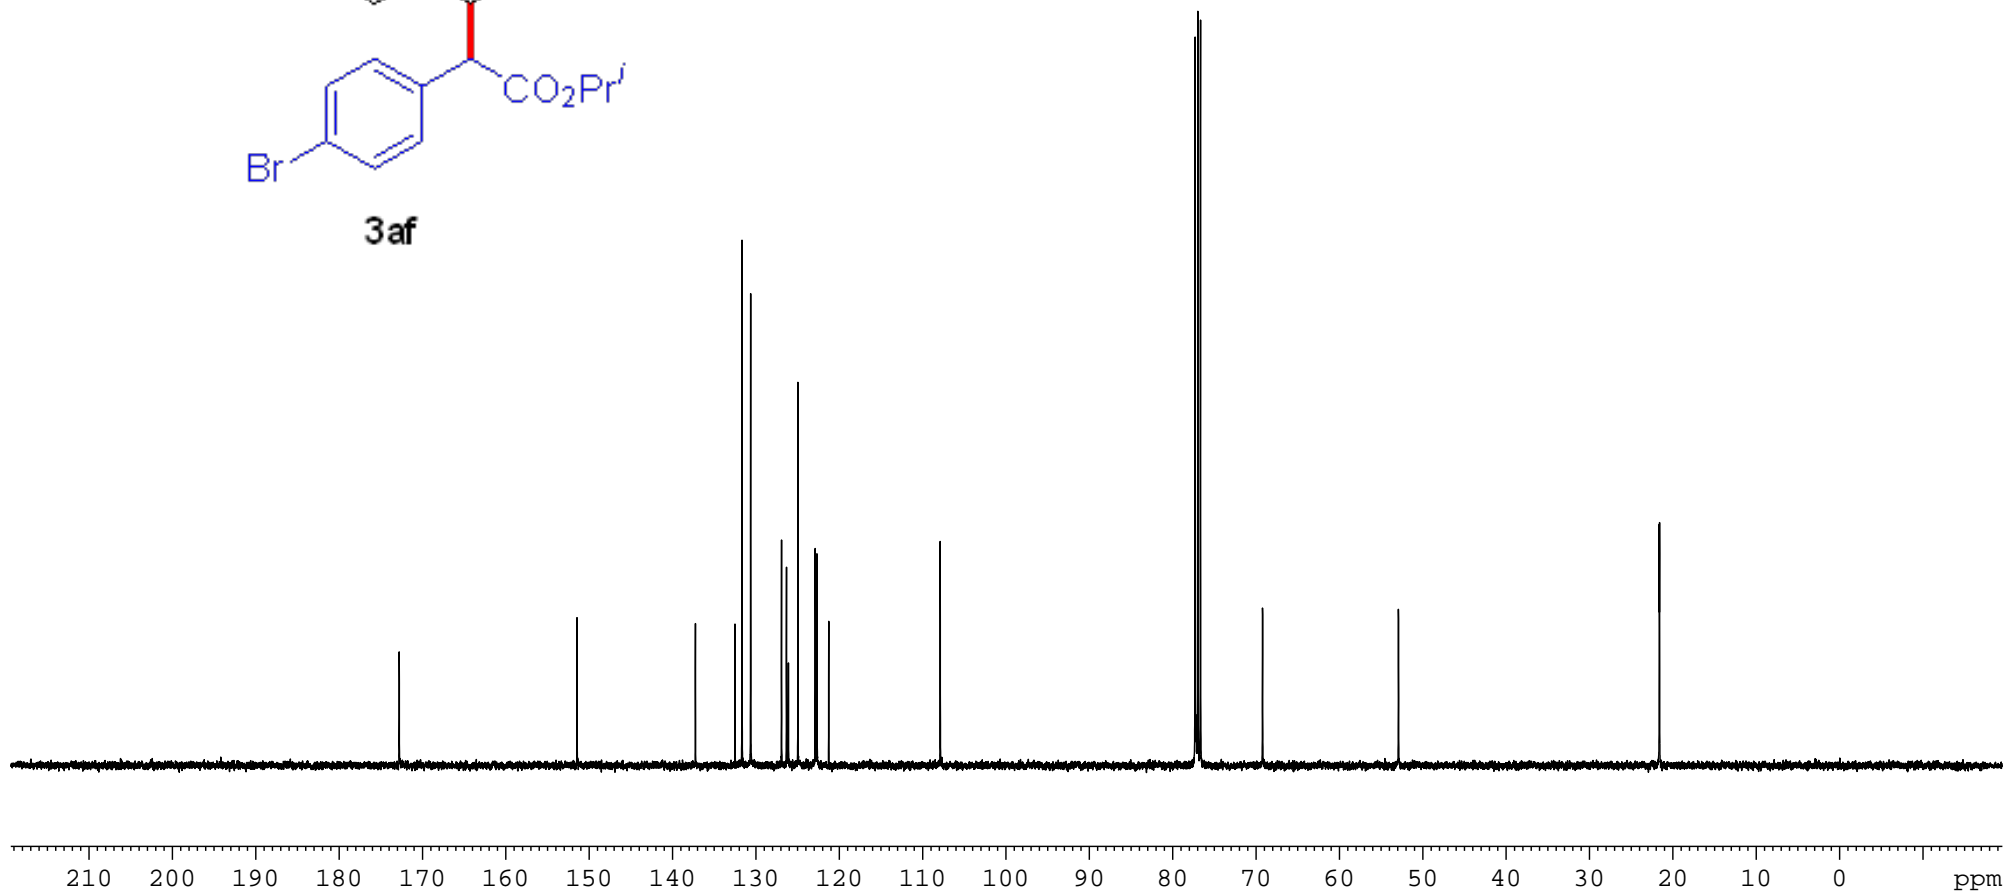

8.2237  
 8.2051  
 8.2024  
 7.9580  
 7.9378  
 7.5191  
 7.515  
 7.502  
 7.498  
 7.495  
 7.481  
 7.477  
 7.470  
 7.466  
 7.449  
 7.432  
 7.430  
 7.260  
 7.244  
 7.224  
 7.170  
 7.150  
 7.013  
 6.993  
 6.480  
 6.460  
 6.208  
 5.636  
 5.184  
 5.168  
 5.152  
 5.137  
 5.121

— 2.345

1.276  
 1.261  
 1.247  
 1.231

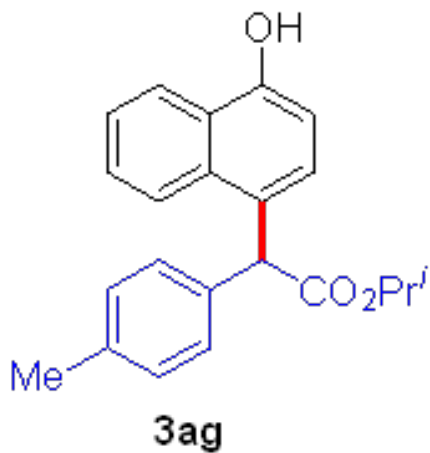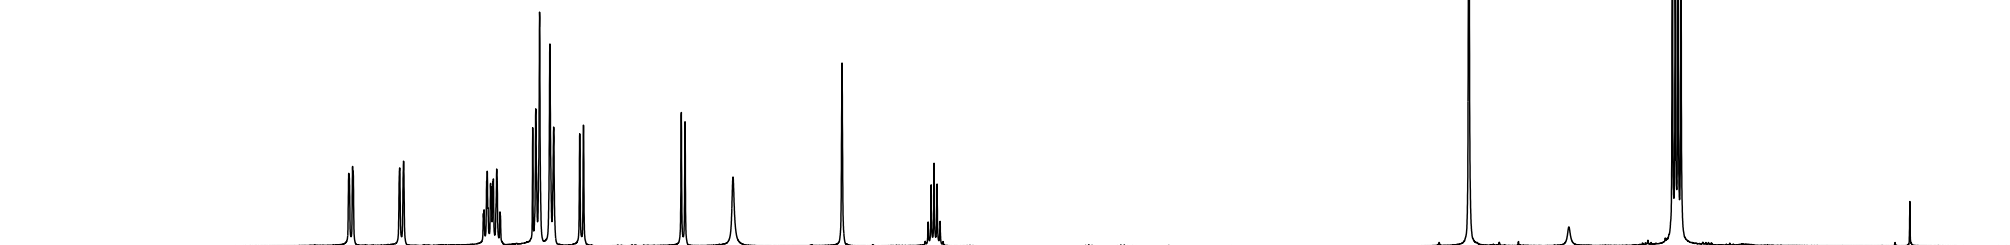

9.5 9.0 8.5 8.0 7.5 7.0 6.5 6.0 5.5 5.0 4.5 4.0 3.5 3.0 2.5 2.0 1.5 1.0 0.5 ppm

1.01

1.01

2.06

2.04

2.02

1.01

1.03

0.96

1.00

1.01

3.02

3.00

3.04

YZZ-14-068-1-C

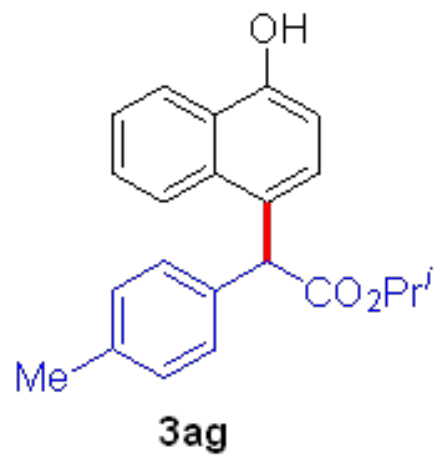

173.48

151.27  
136.83  
135.10  
132.68  
129.30  
128.80  
126.83  
126.73  
126.46  
124.95  
124.75  
123.00  
122.63  
108.02

77.32  
77.20  
77.00  
76.68  
68.92

53.11

21.65  
21.63  
21.05

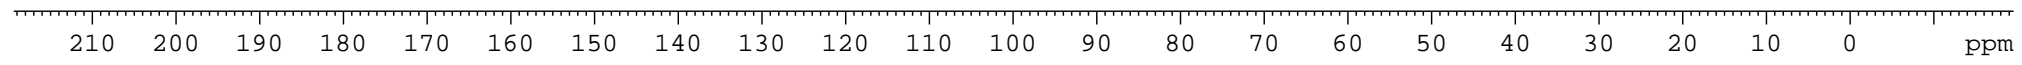

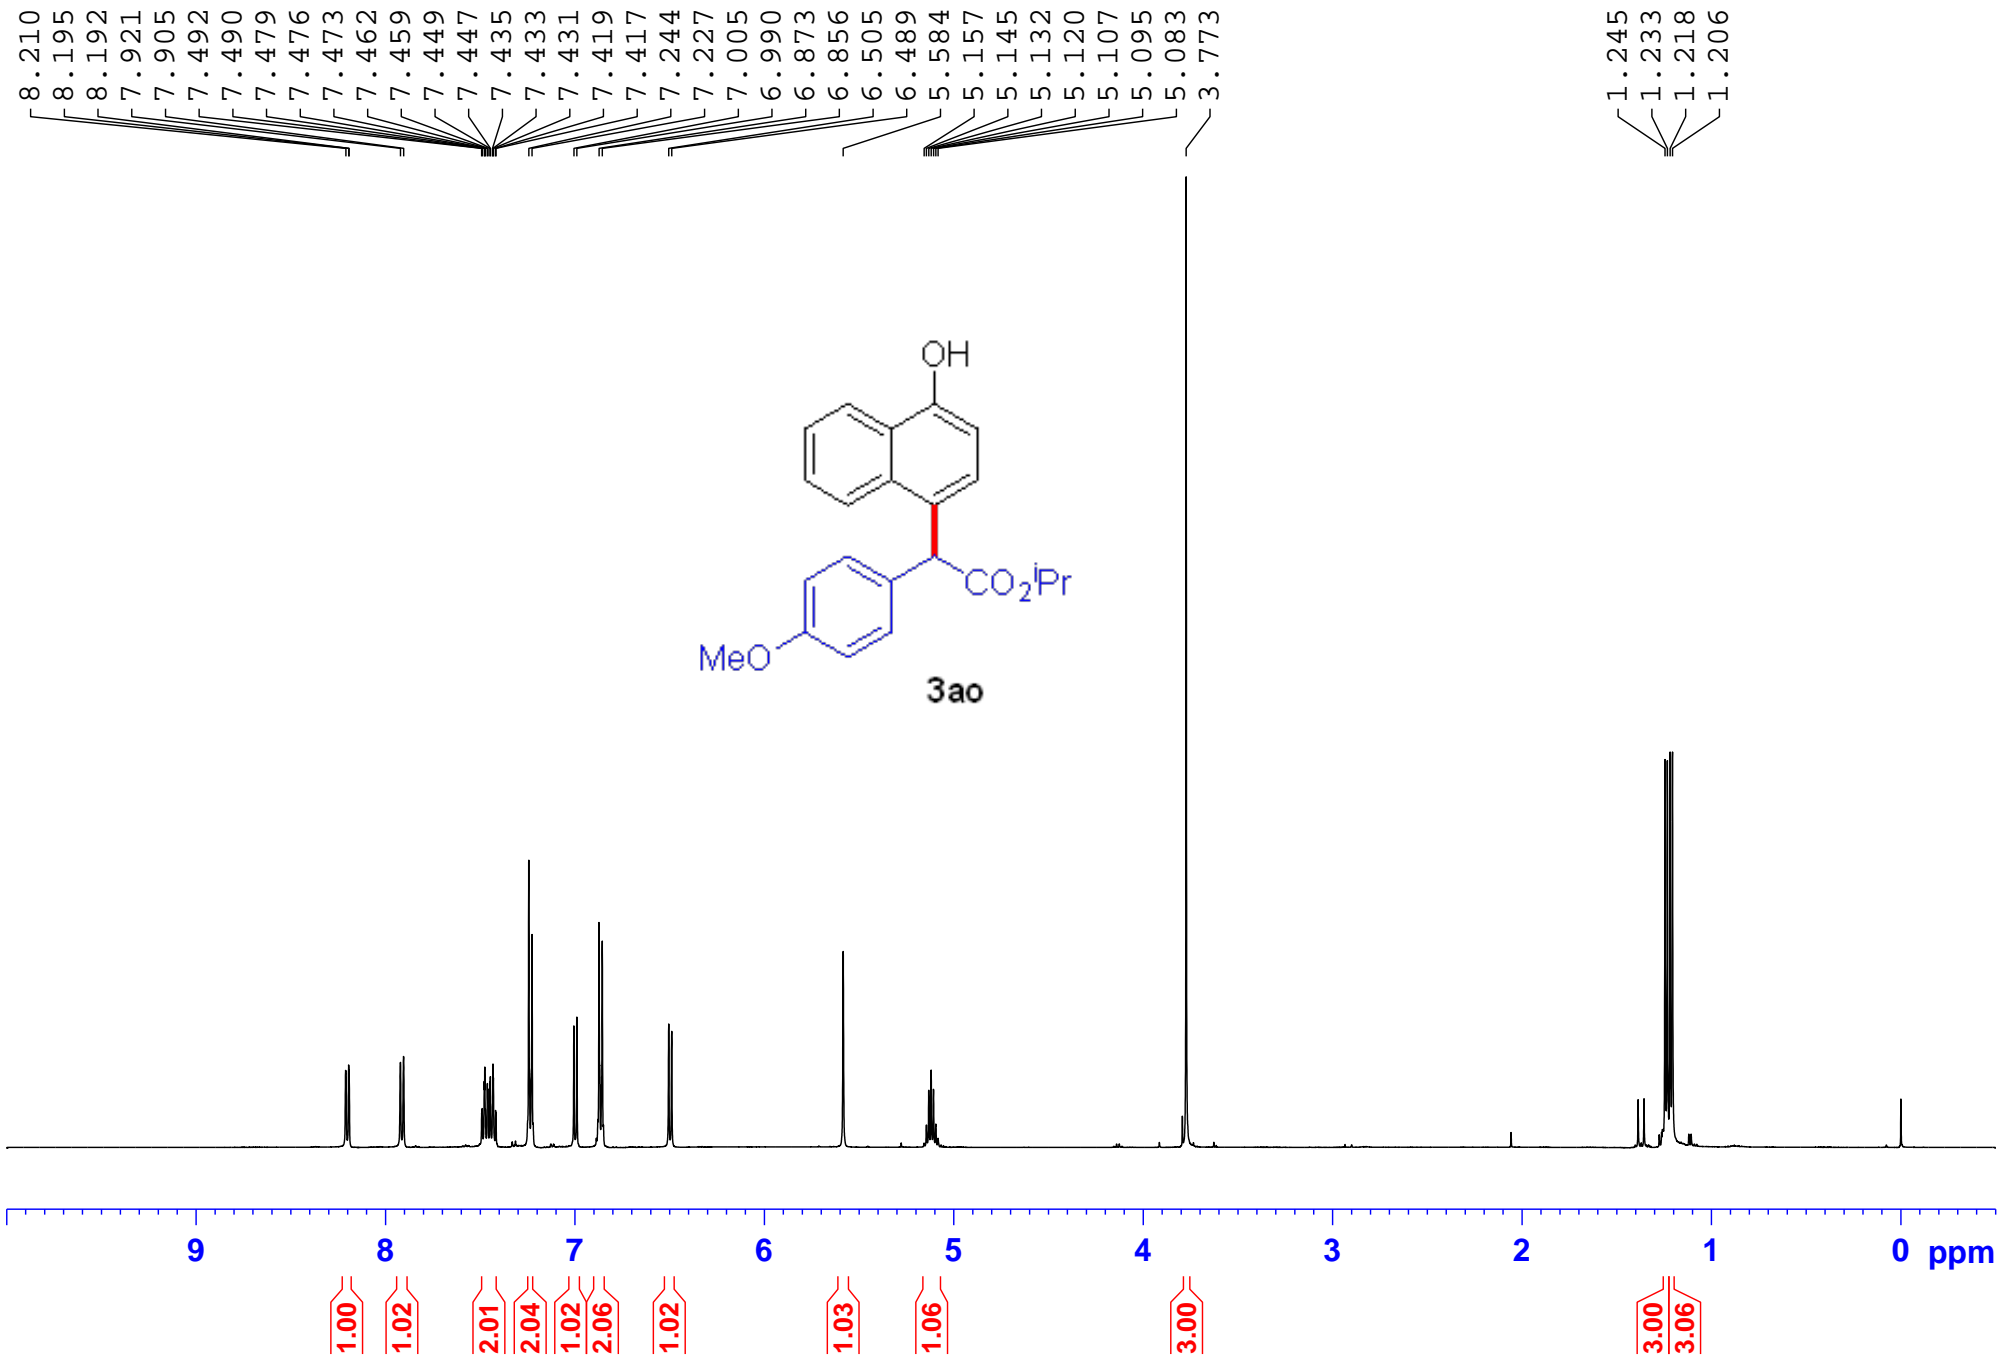

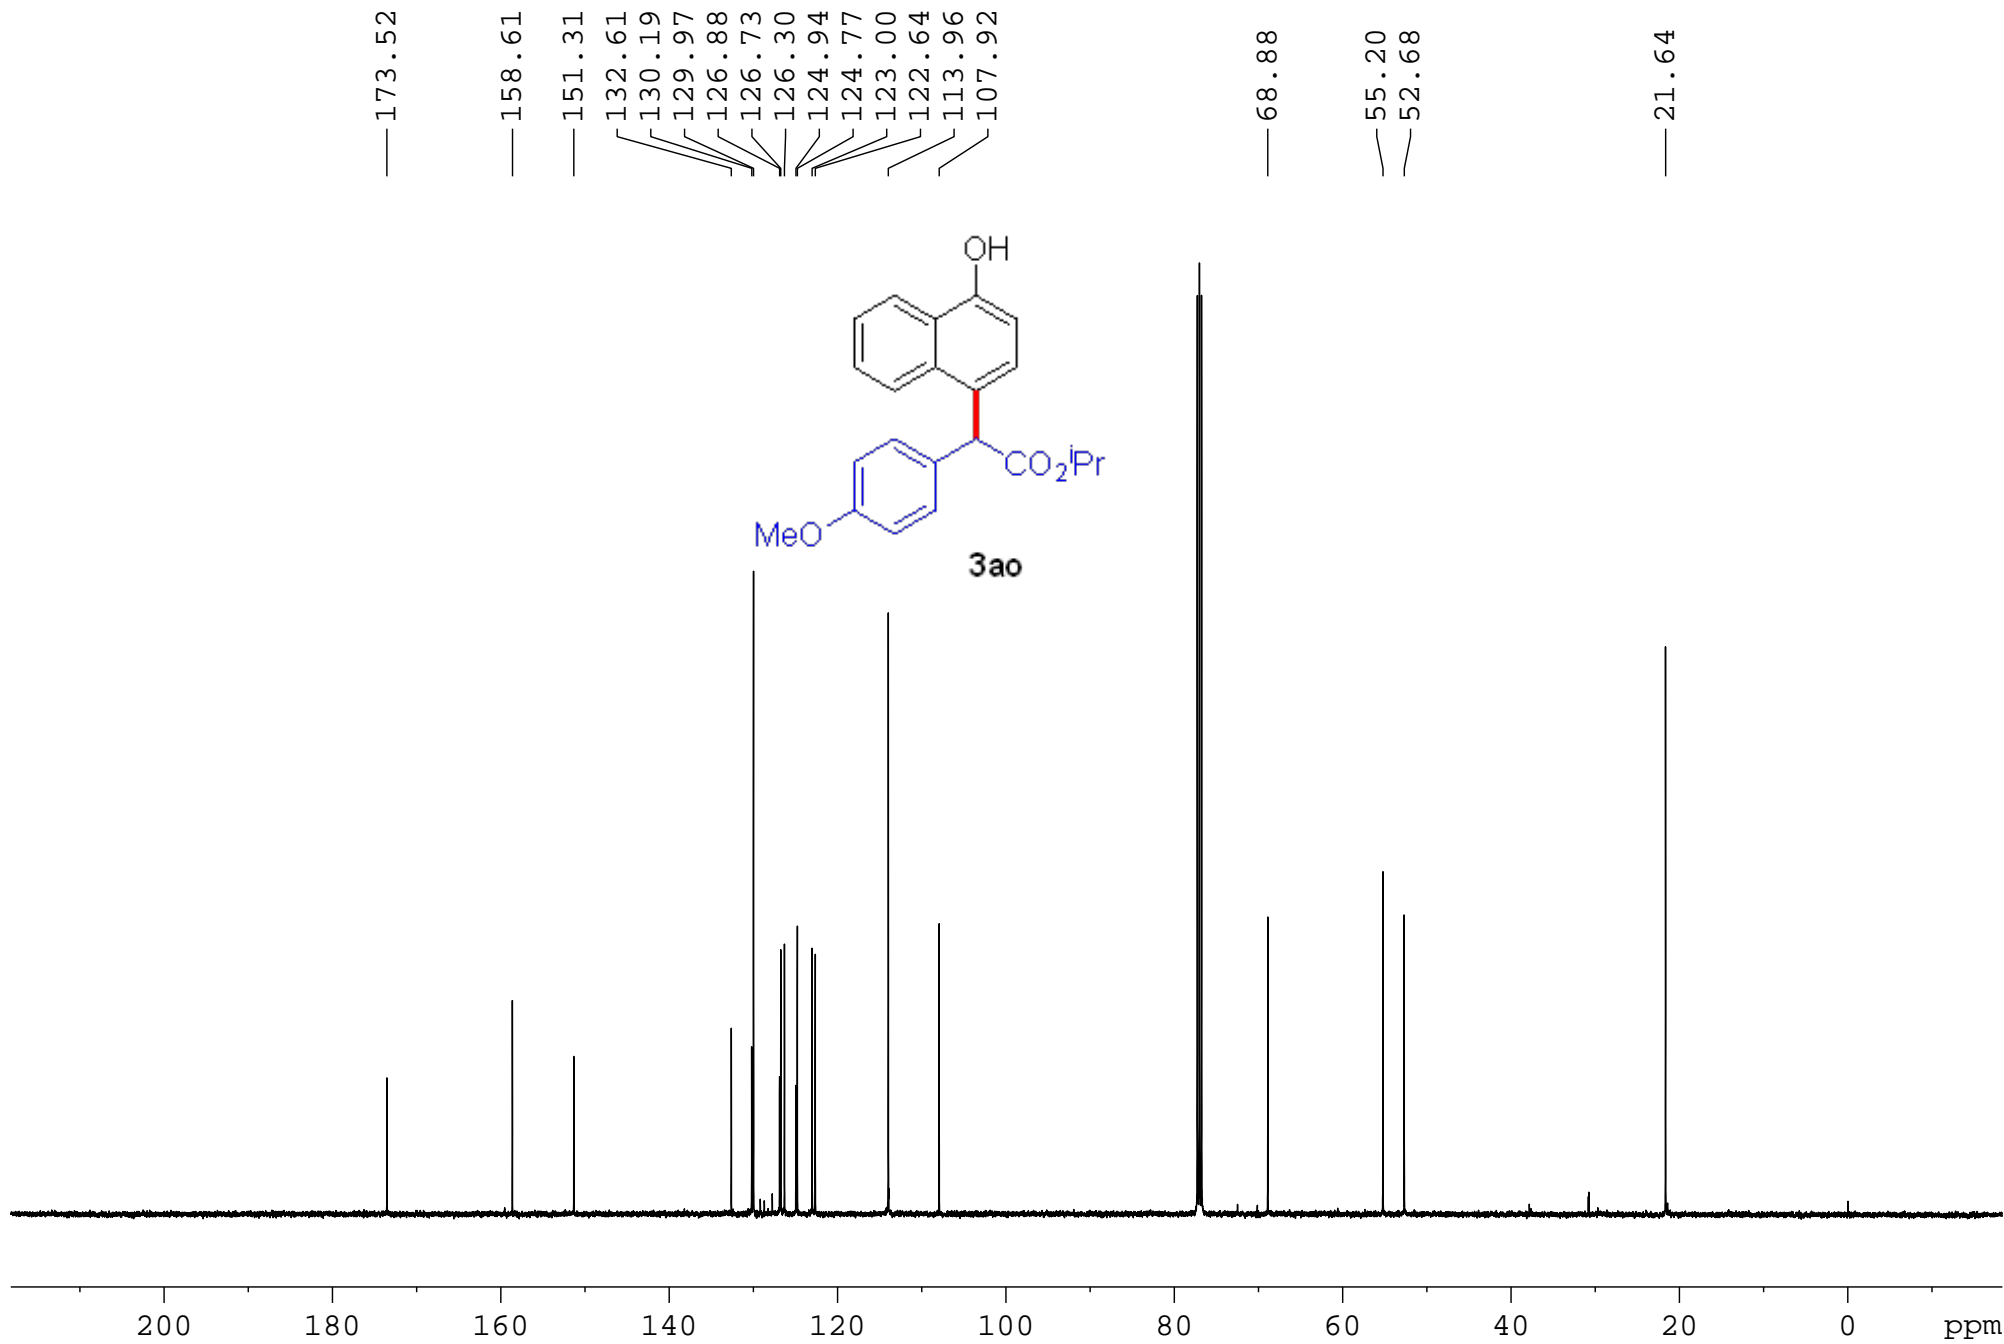



8.257  
8.240  
7.901  
7.884  
7.615  
7.599  
7.529  
7.516  
7.501  
7.499  
7.470  
7.454  
7.016  
7.000  
6.698  
6.692  
6.683  
6.511  
6.495  
5.744  
5.226  
5.213  
5.201  
5.188  
5.176  
5.163  
5.151

1.282  
1.278  
1.270  
1.266

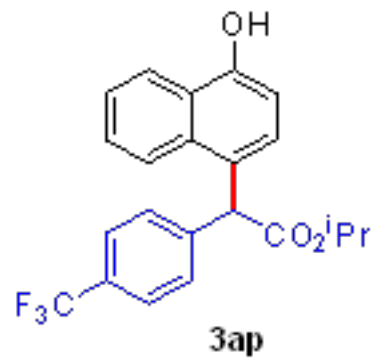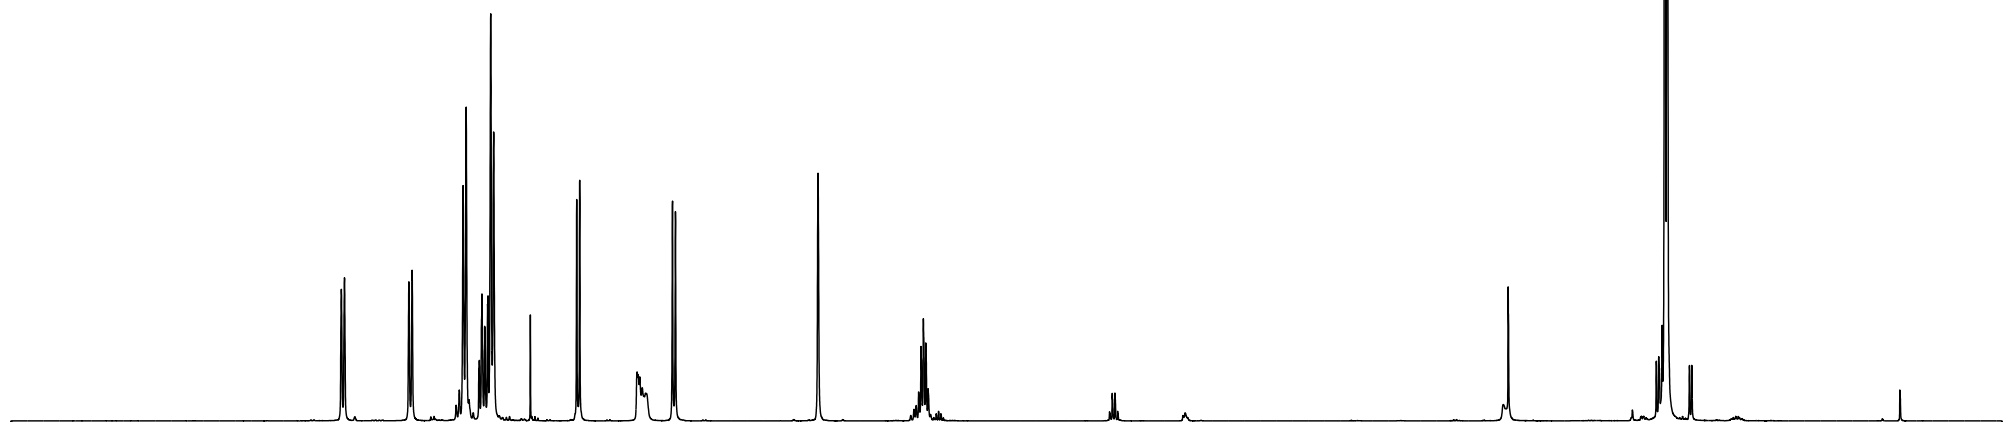

9.5 9.0 8.5 8.0 7.5 7.0 6.5 6.0 5.5 5.0 4.5 4.0 3.5 3.0 2.5 2.0 1.5 1.0 0.5 ppm

1.00  
1.01  
2.04  
4.04  
1.00  
1.03  
1.02  
1.00  
1.05  
3.00  
3.01

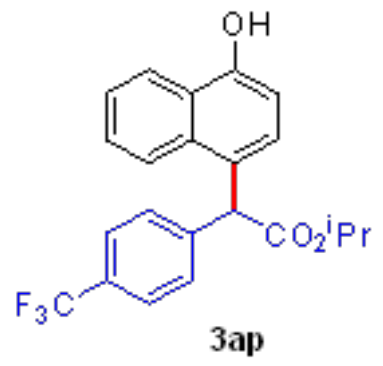

- 172.91
- 151.77
- 142.20
- 132.47
- 129.29
- 127.01
- 126.73
- 126.48
- 125.55
- 125.52
- 125.49
- 125.46
- 125.05
- 124.99
- 127.33
- 125.14
- 122.99
- 122.81
- 122.74
- 120.84
- 107.87
- 70.91
- 69.58
- 53.25
- 21.59
- 21.54
- 125.46
- 125.42
- 125.40
- 125.37

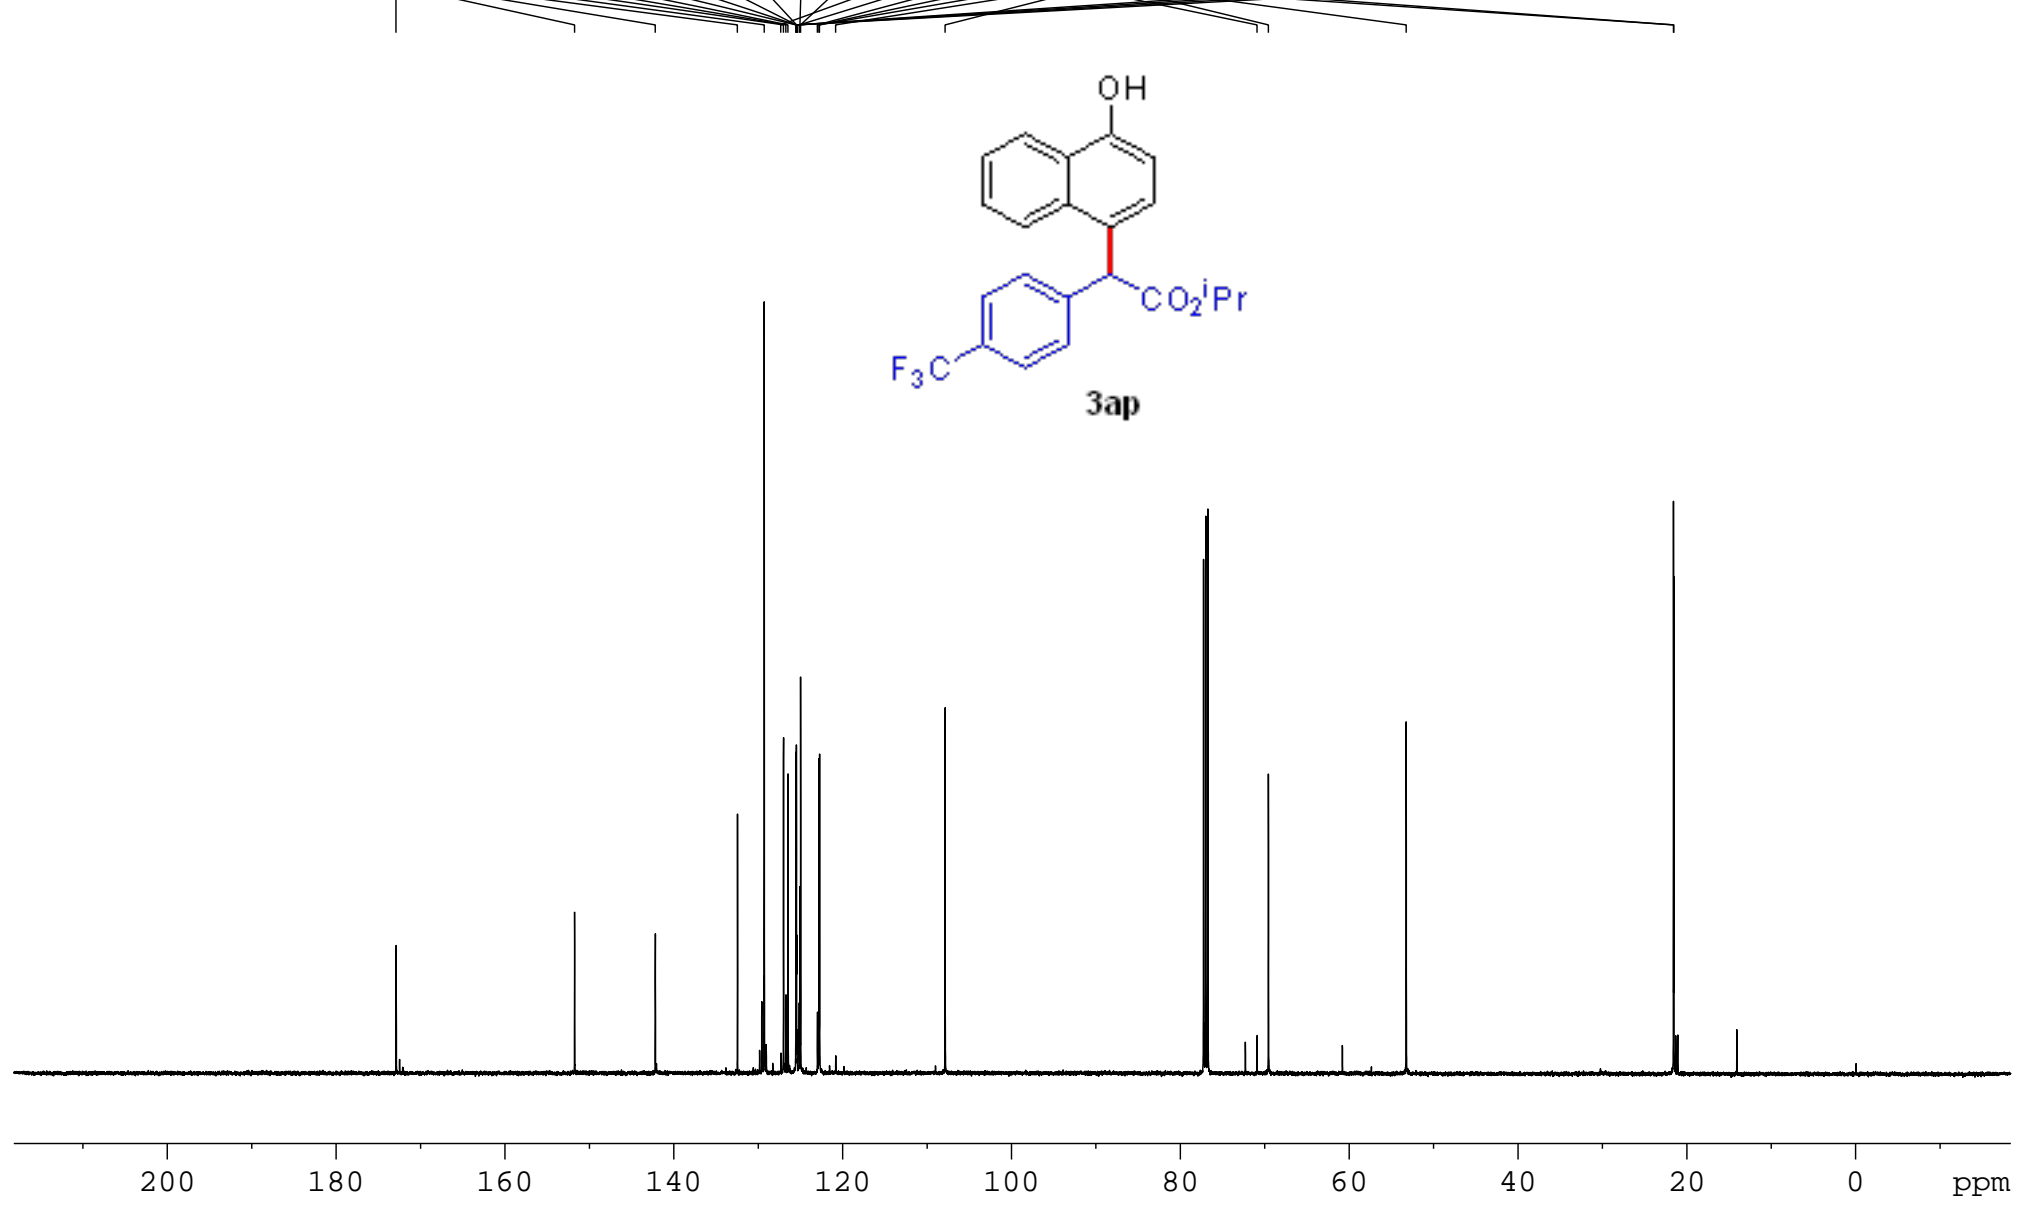

YN  
7.882  
7.863  
7.518  
7.514  
7.501  
7.497  
7.493  
7.482  
7.478  
7.462  
7.459  
7.446  
7.442  
7.314  
7.252  
7.248  
7.241  
7.238  
7.232  
7.228  
7.220  
7.210  
7.206  
7.199  
7.187  
7.183  
7.061  
7.042  
6.577  
6.558  
5.834  
5.609  
5.160  
5.145  
5.129  
5.114  
5.098

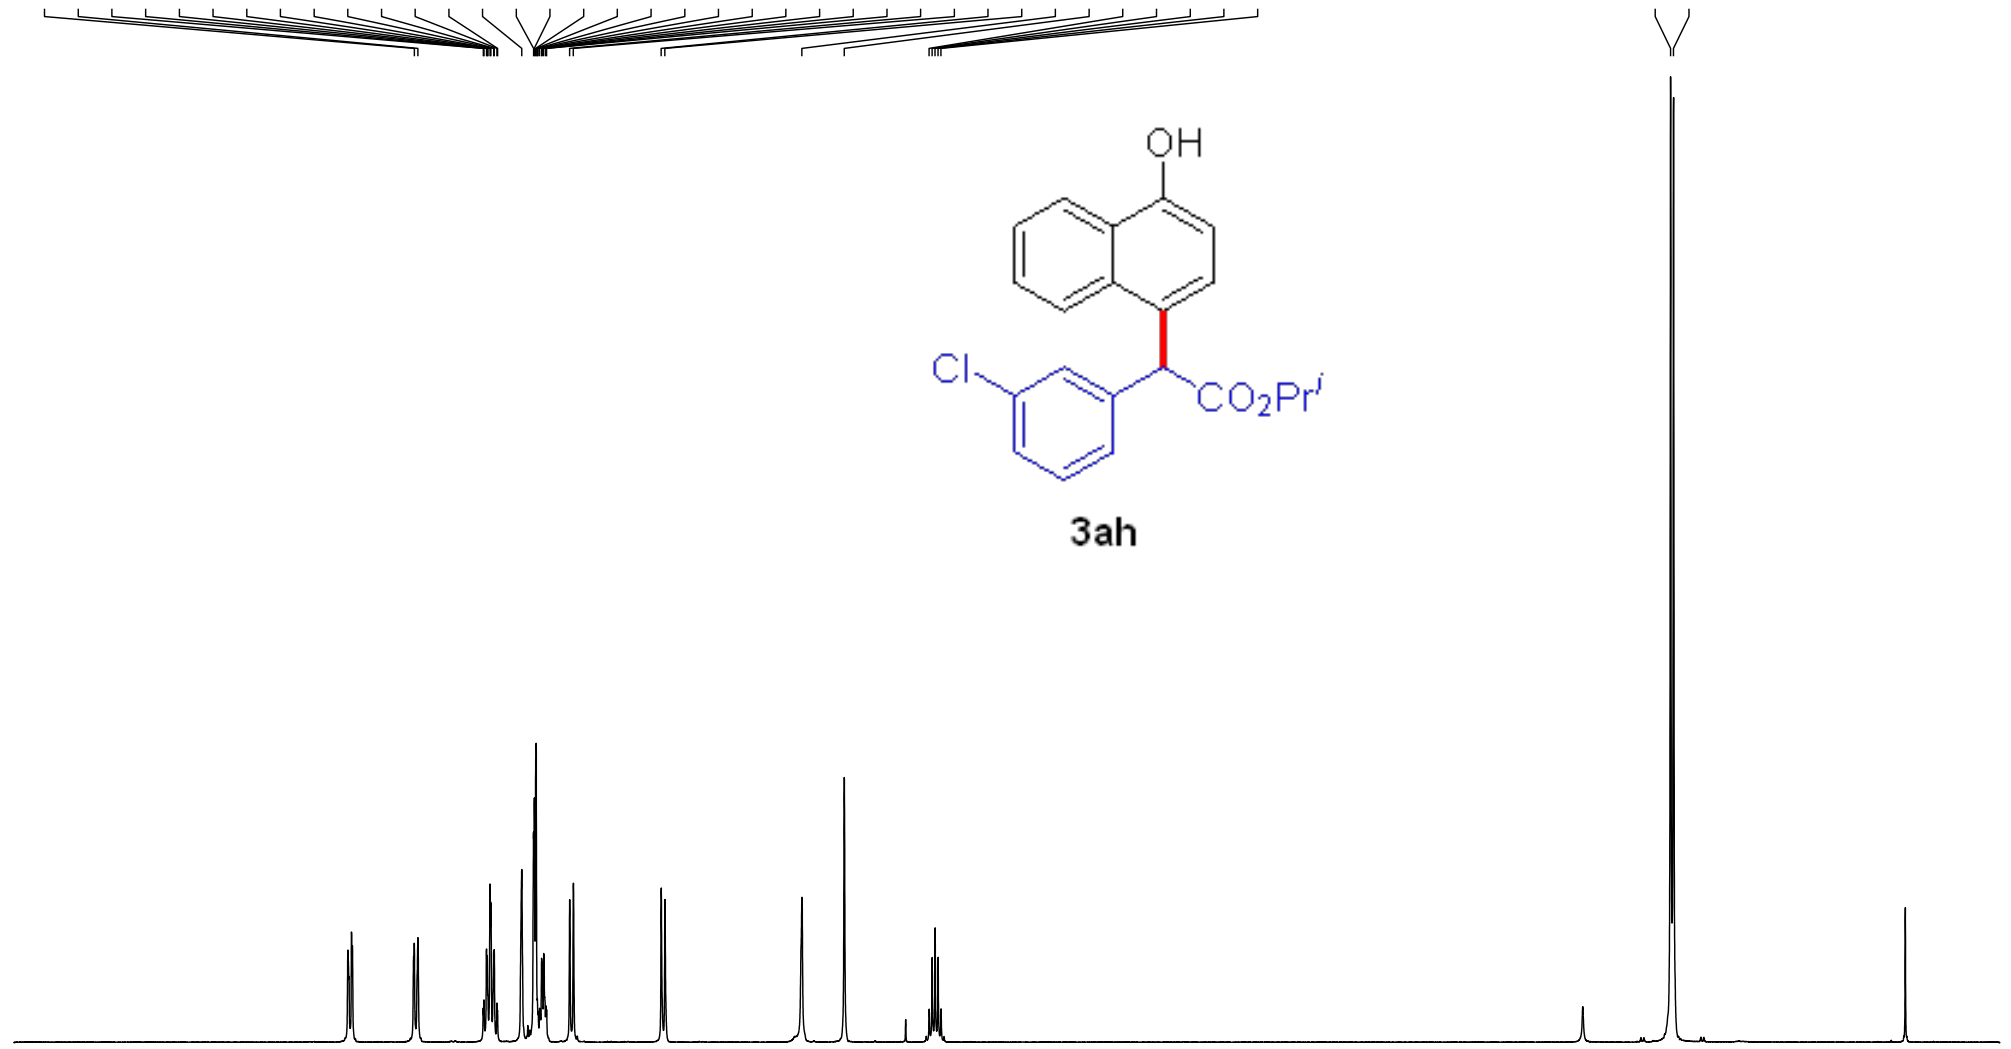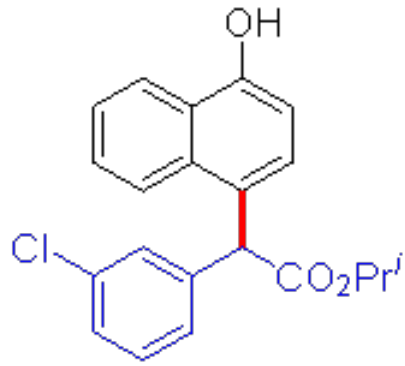

3ah

9 8 7 6 5 4 3 2 1 0 ppm

0.99 1.00 2.03 1.00 3.00 1.02 1.00 1.00 1.00 0.99 6.02

1.241  
1.225

yzz-14-059-2-c

— 172.52

— 151.43

140.29

134.43

132.56

129.76

129.08

127.50

127.13

127.01

126.38

126.08

125.03

124.95

122.92

122.67

107.95

77.32

77.00

76.68

— 69.22

— 53.06

21.66

21.60

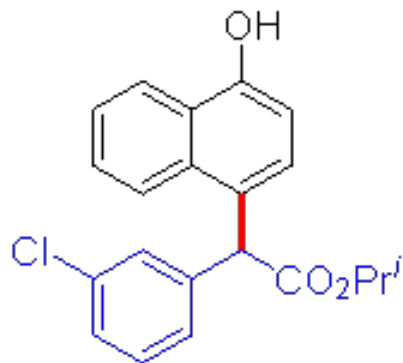

3ah

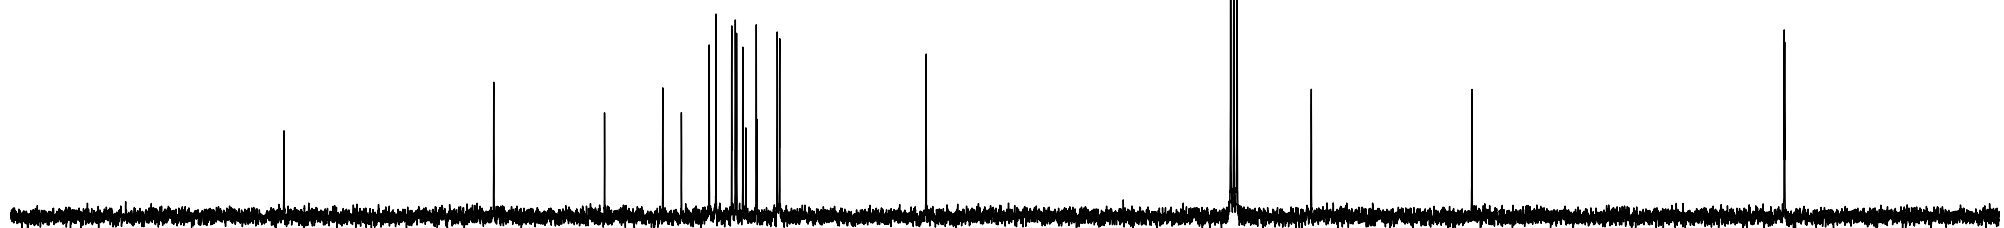

190 180 170 160 150 140 130 120 110 100 90 80 70 60 50 40 30 20 10 ppm

yzz-14-074-2

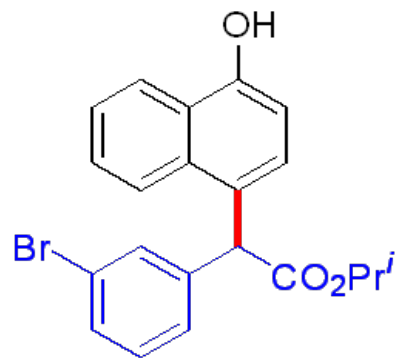

3ai

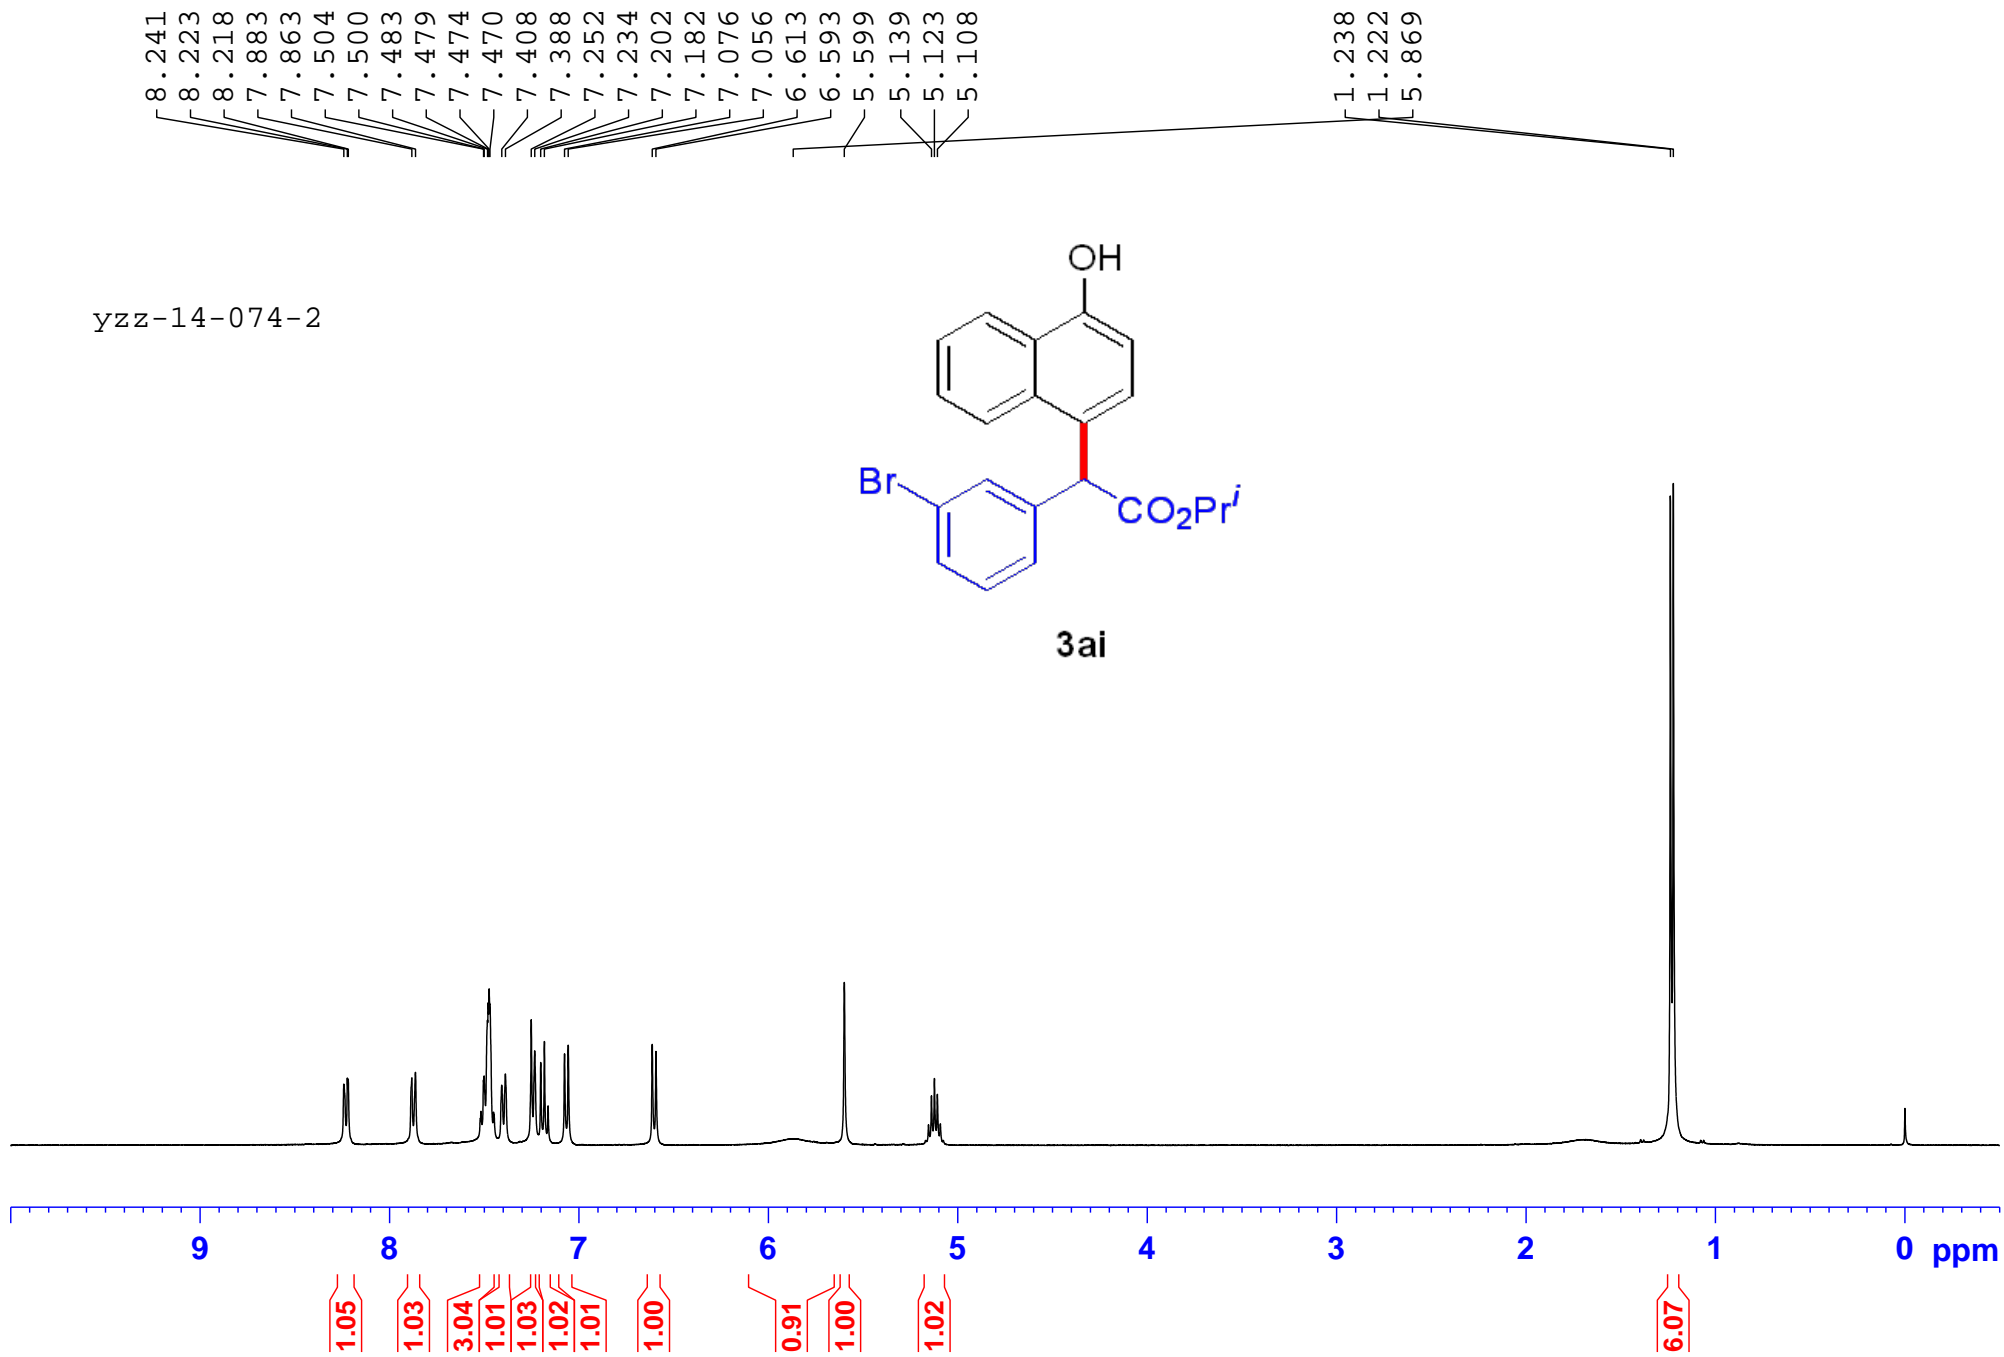

YZZ-14-042-2-C

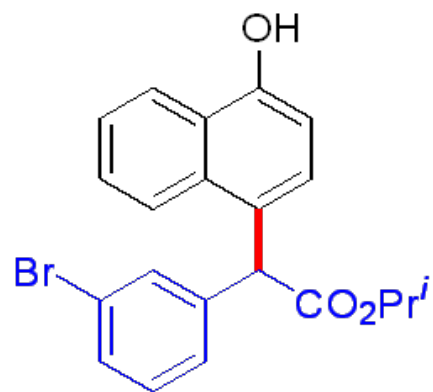

3ai

172.32  
151.45  
140.67  
132.60  
131.96  
130.41  
130.05  
127.59  
127.03  
126.40  
126.19  
125.06  
124.99  
122.98  
122.66  
107.96  
77.32  
77.00  
76.69  
69.14  
53.03  
21.67  
21.60

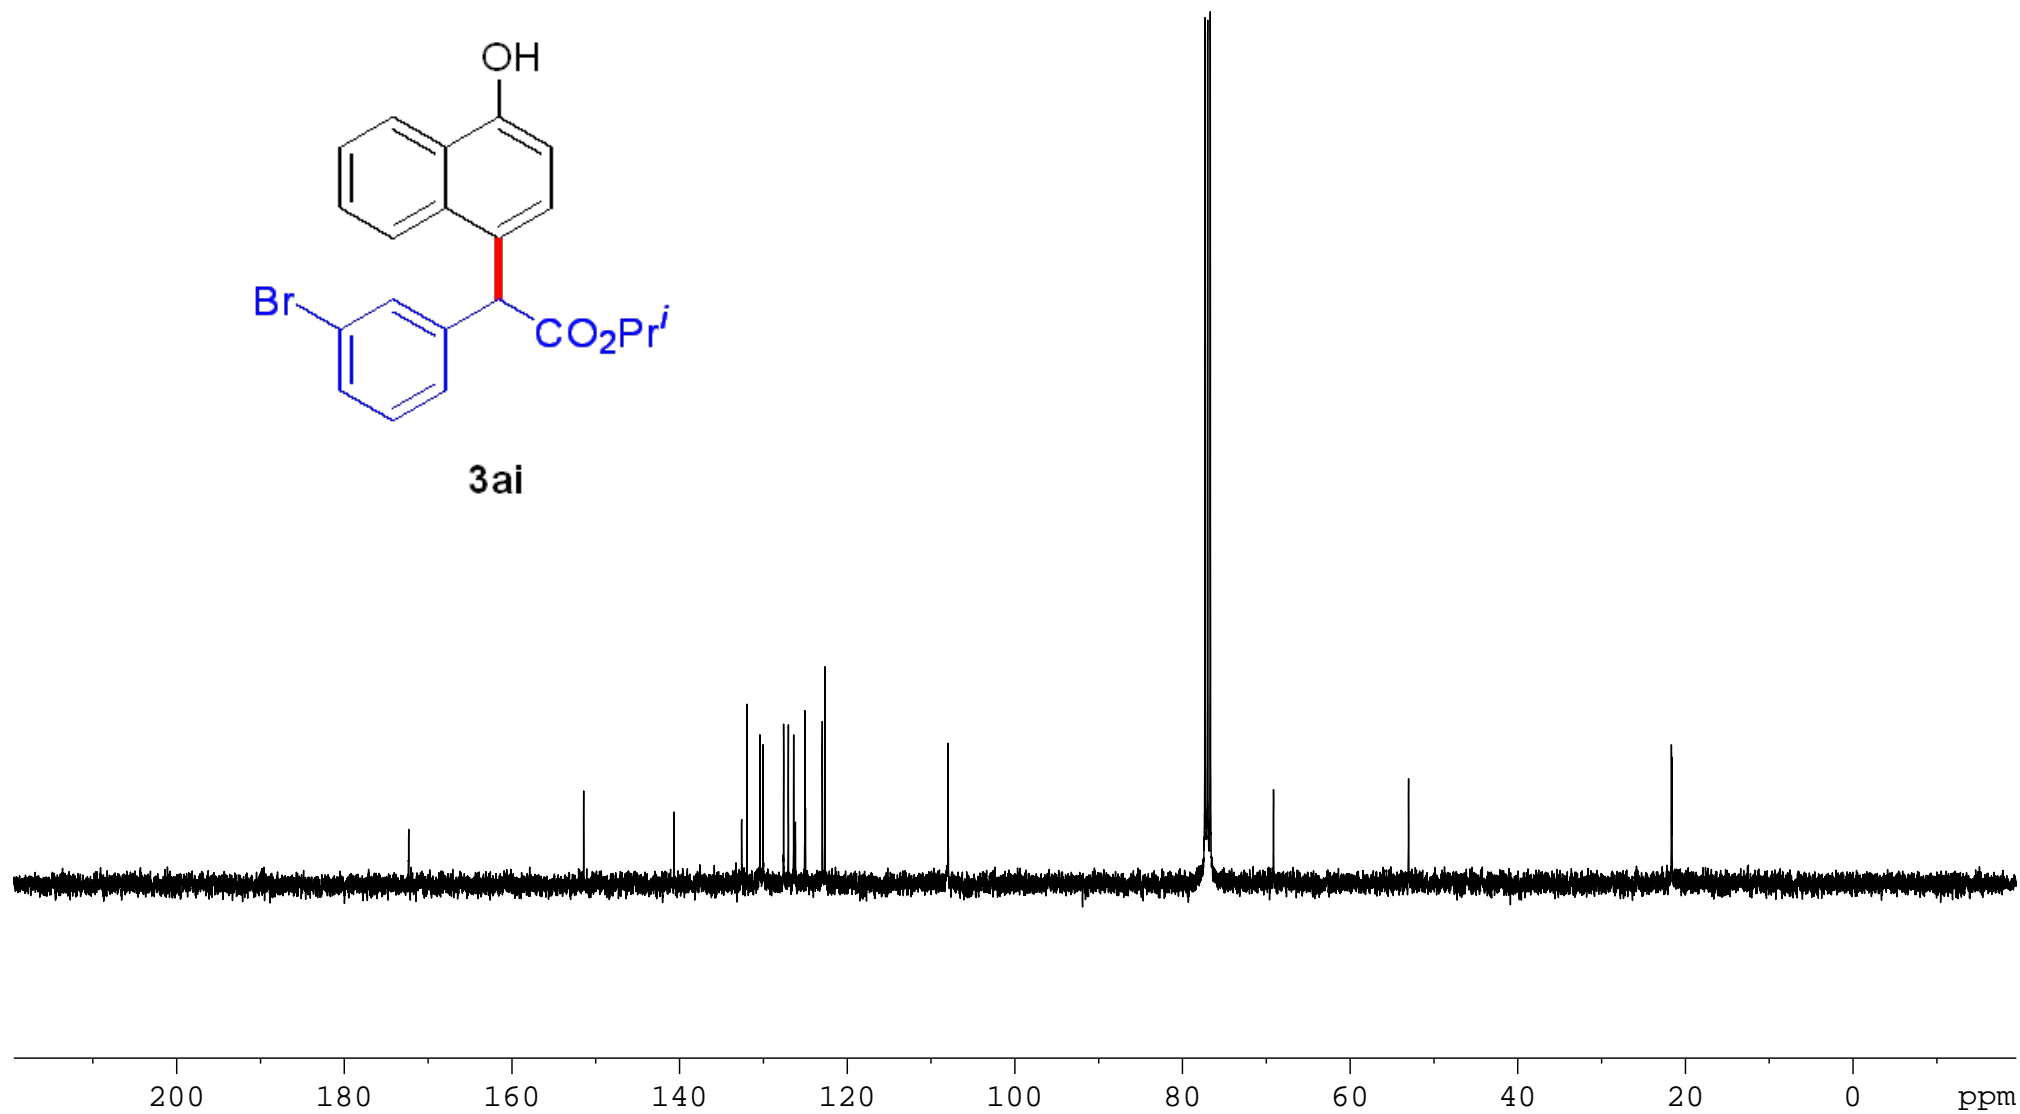

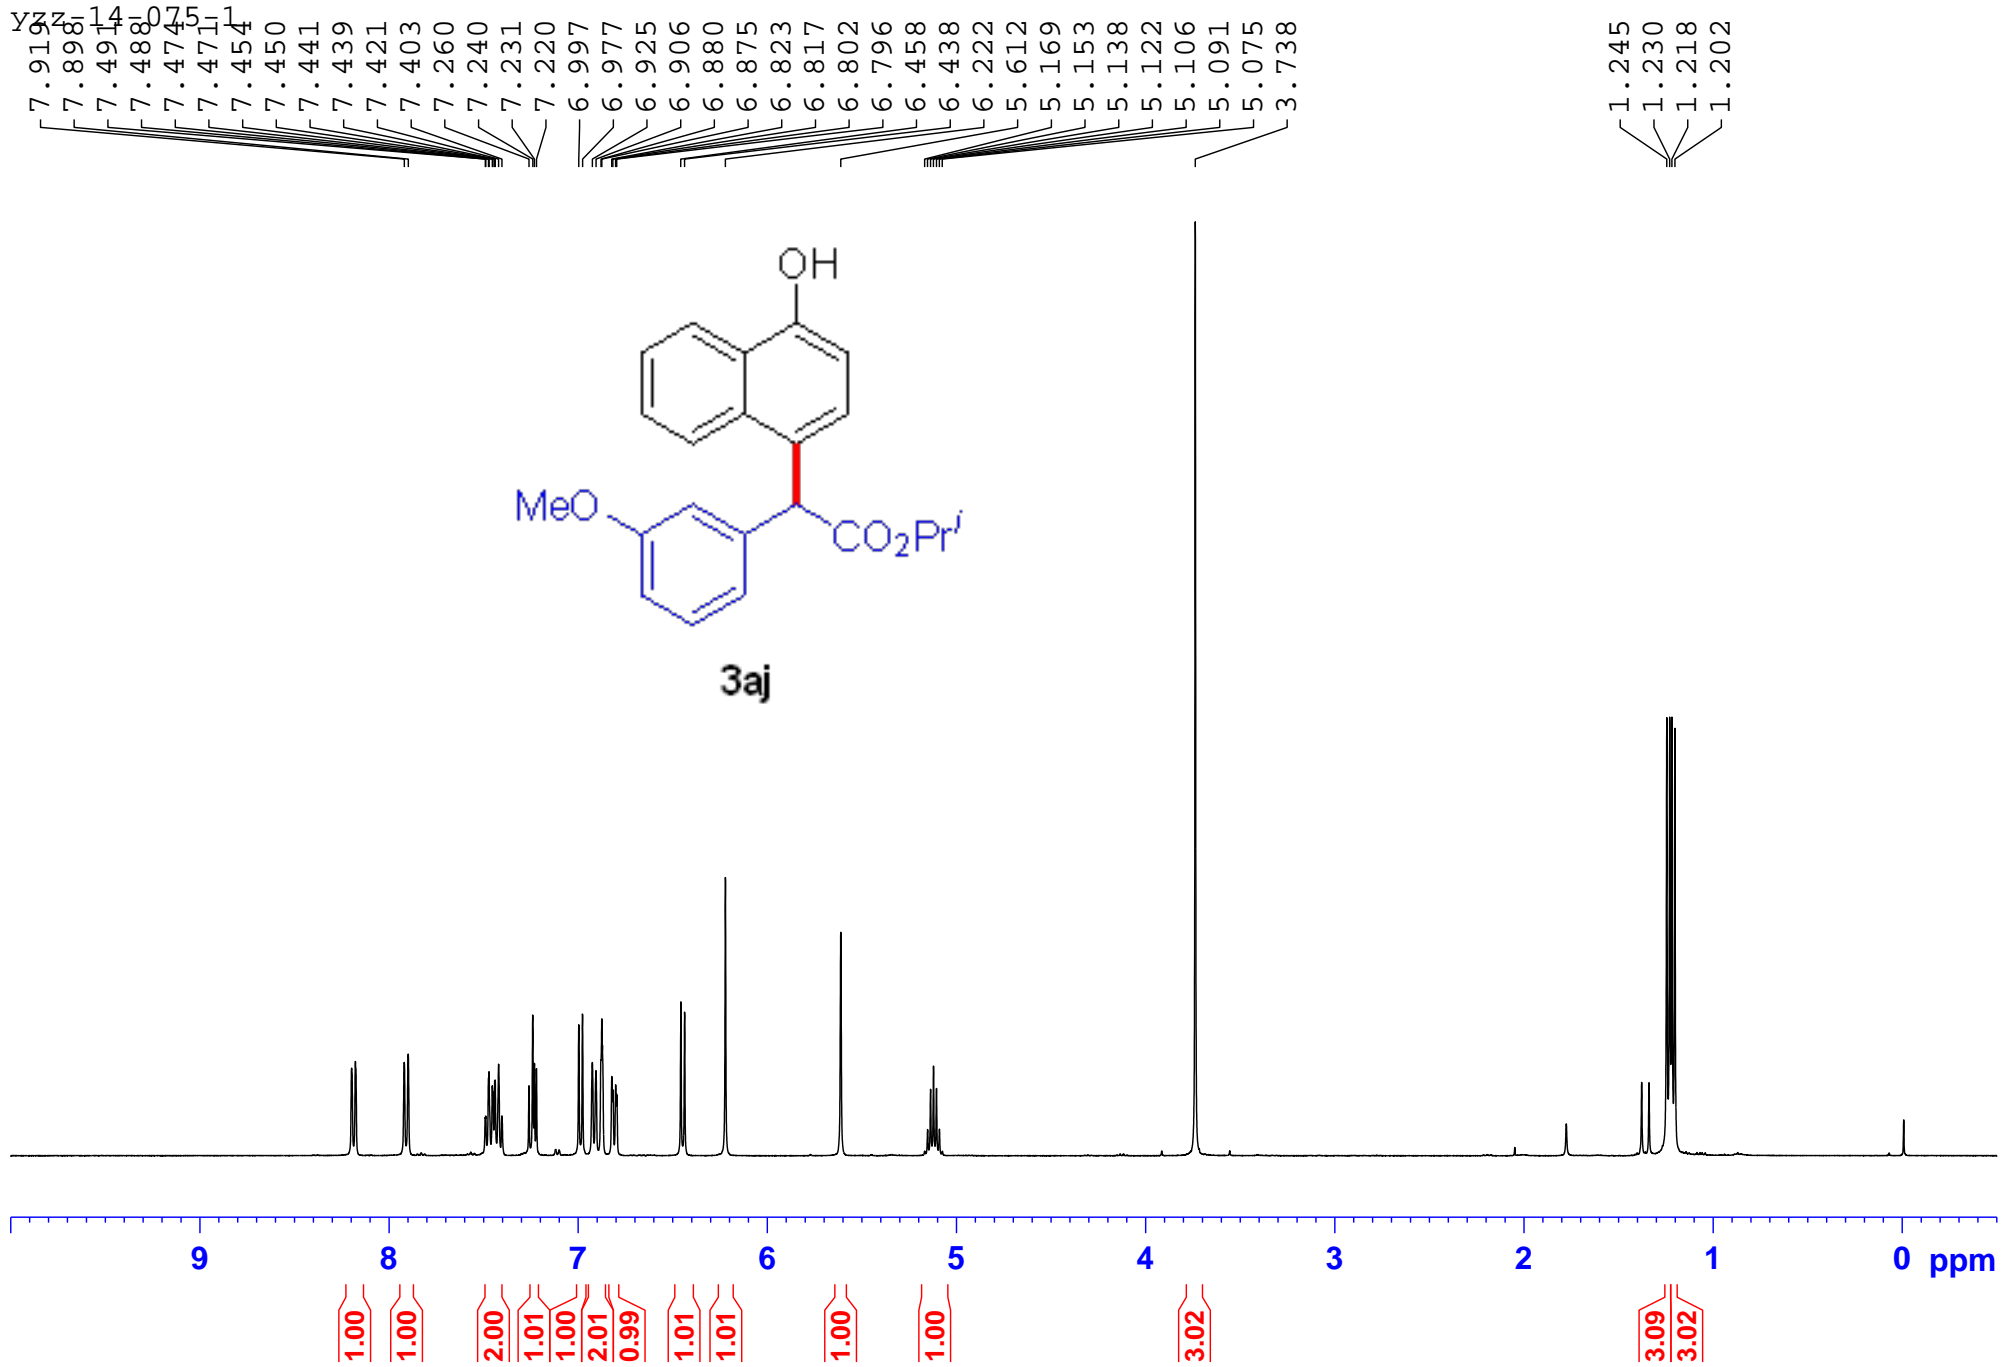

yyy-14-075-1-c

— 173.13  
— 159.67  
— 151.38  
139.67  
132.67  
129.53  
126.77  
126.52  
126.43  
124.93  
124.77  
122.92  
122.66  
121.43  
114.86  
112.59  
107.97  
  
77.32  
77.00  
76.68  
— 69.01  
  
55.16  
53.44  
  
21.65  
21.63

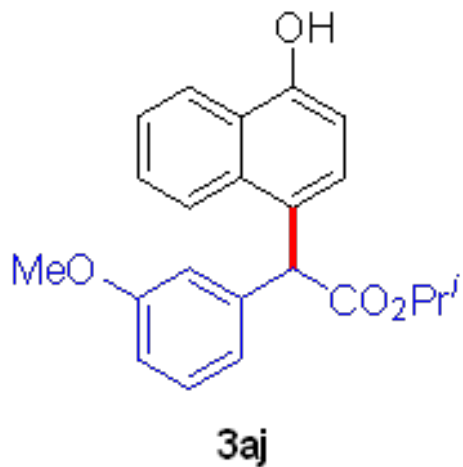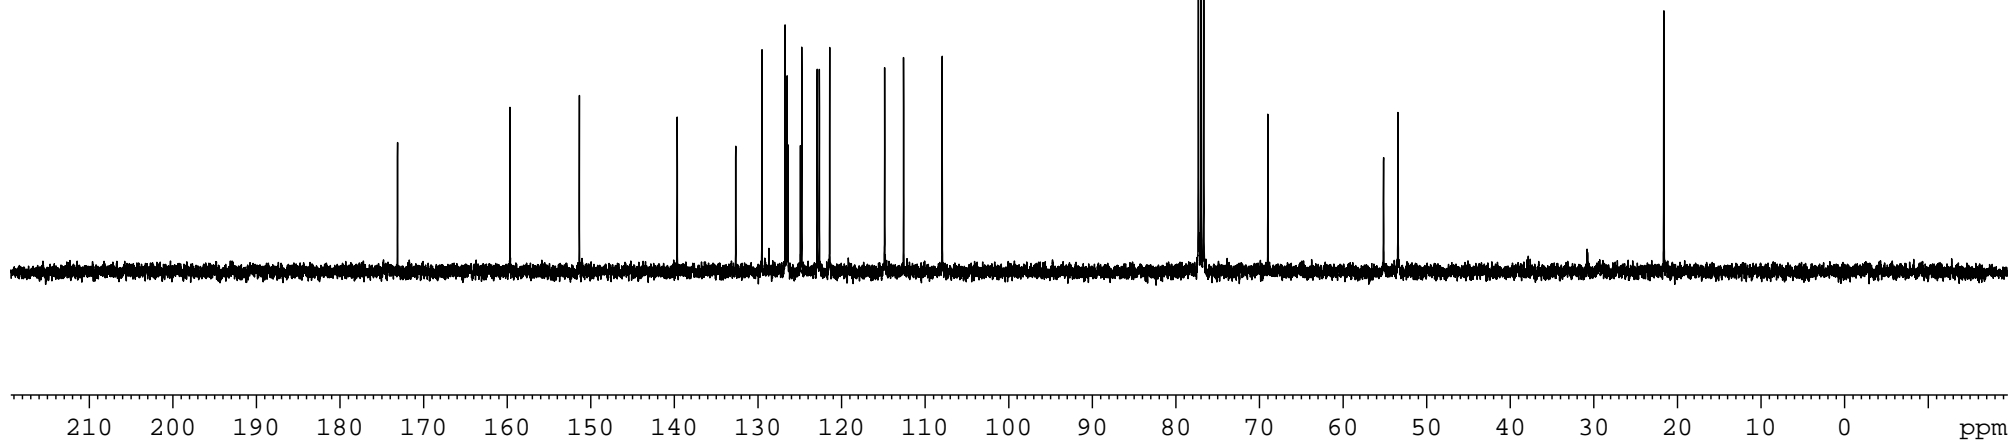



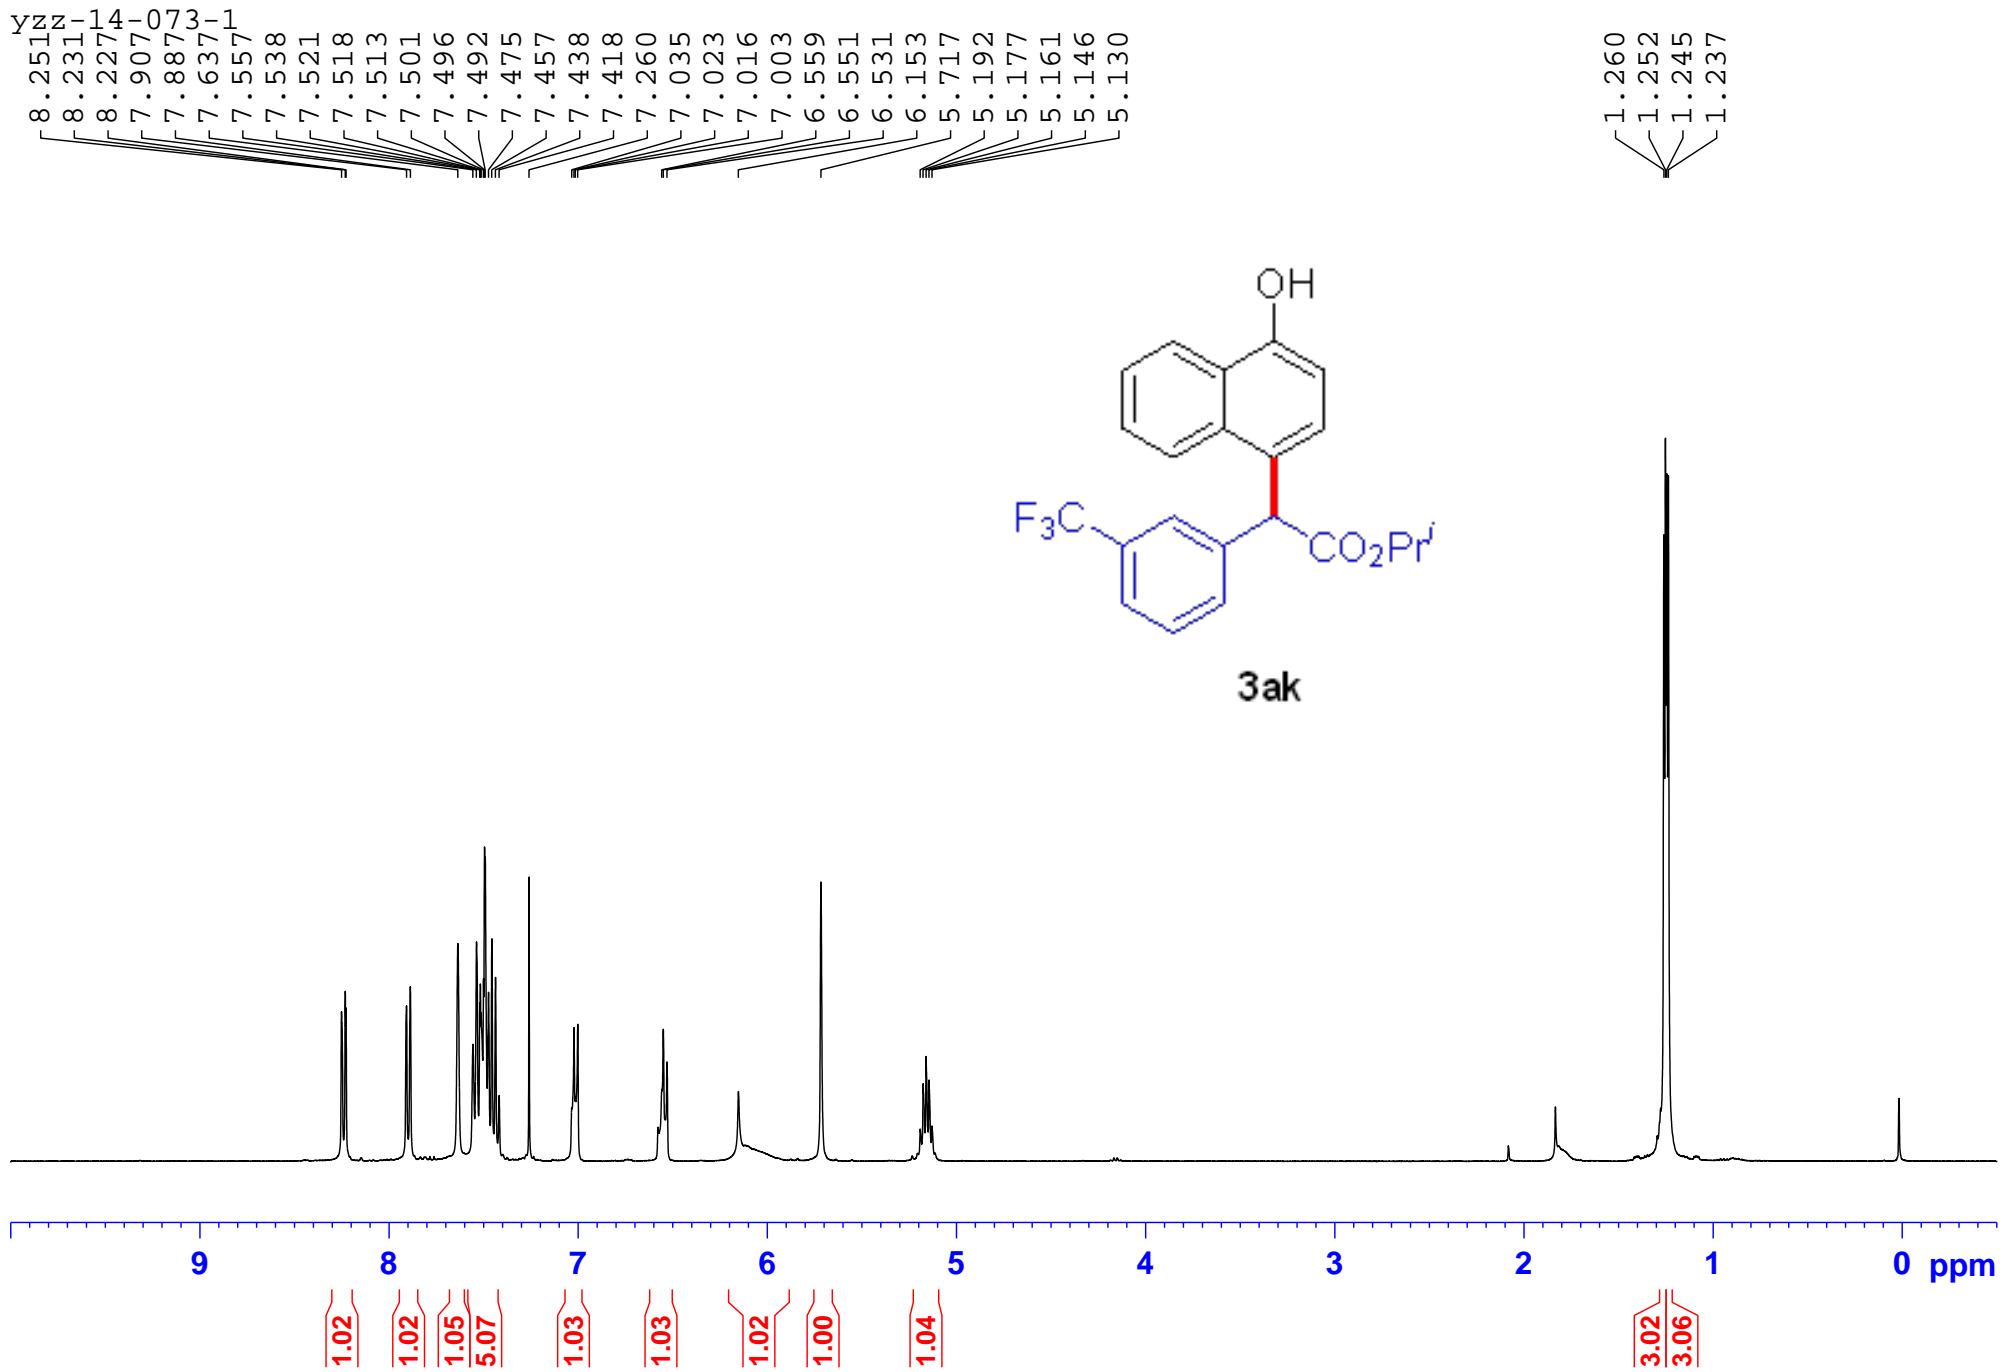

yzz-14-073-1-c

172.62

151.61  
139.25  
132.53  
132.34  
131.36  
131.04  
130.72  
130.40  
129.02  
128.10  
127.06  
126.47  
125.84  
125.76  
125.72  
125.68  
125.64  
125.39  
125.05  
125.01  
124.20  
124.17  
122.80  
122.75  
122.68  
119.97  
107.93

77.32  
77.00  
76.68

69.42

53.20

21.59  
21.56

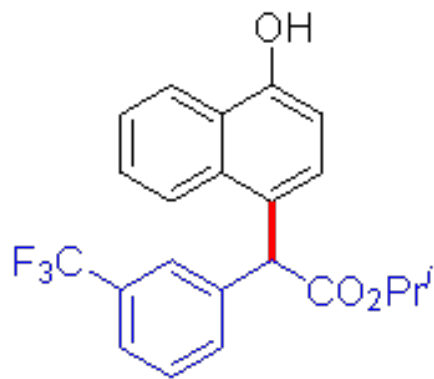

3ak

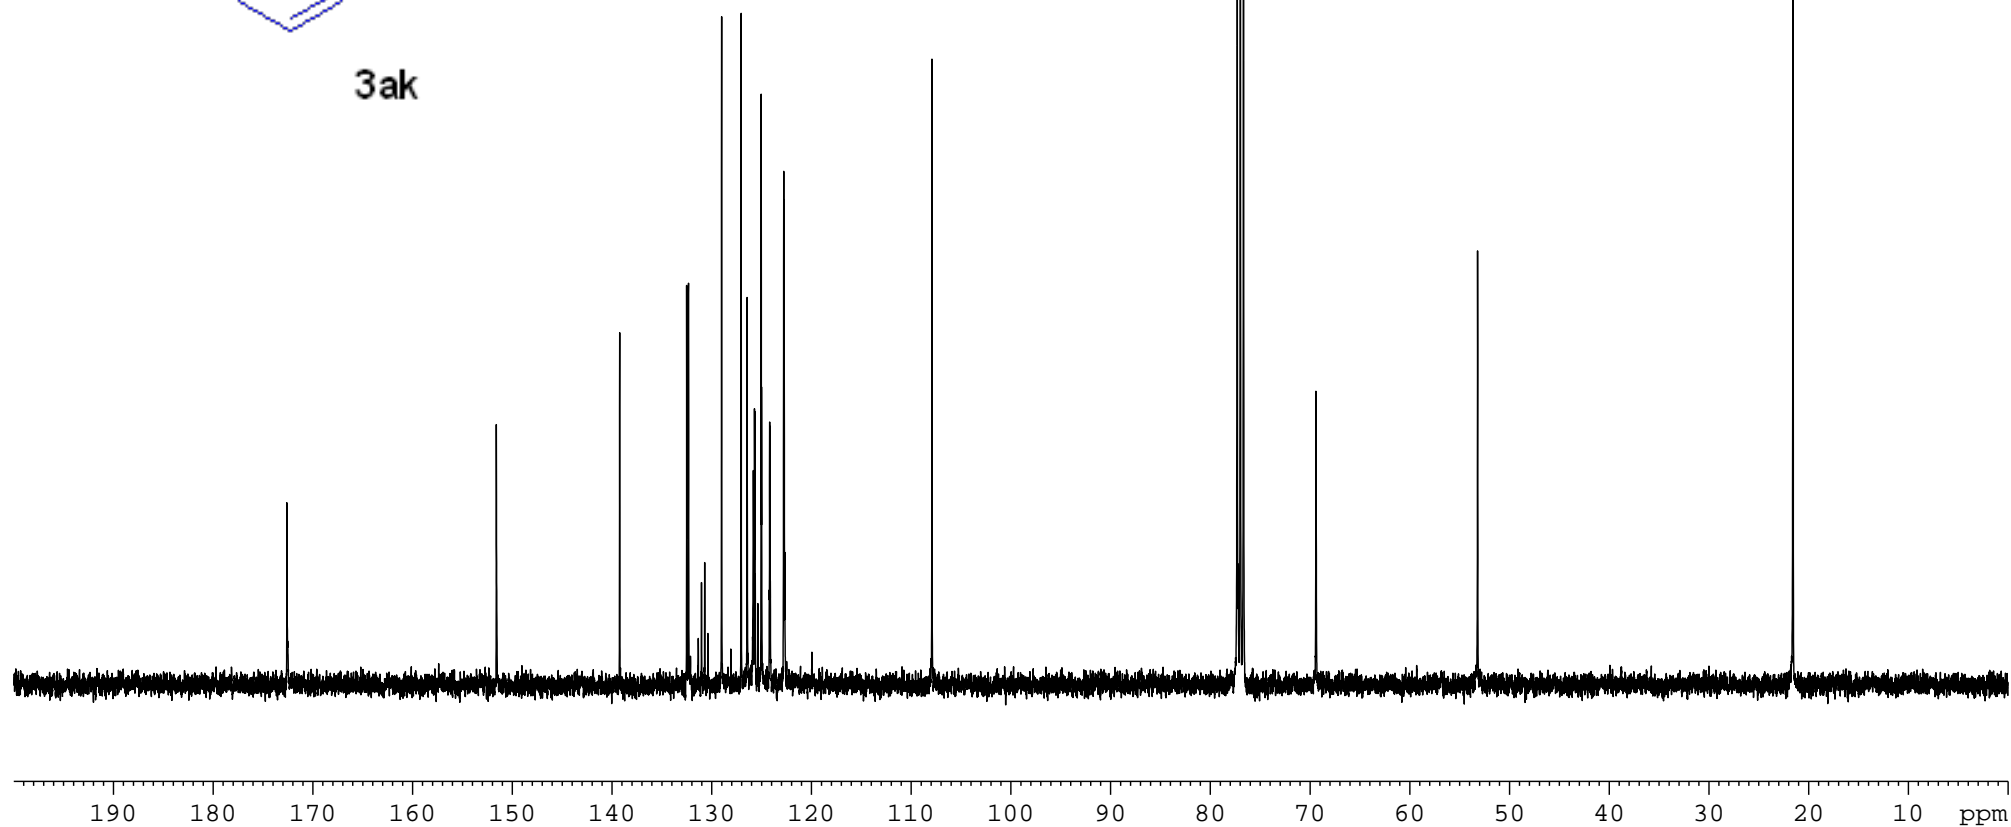

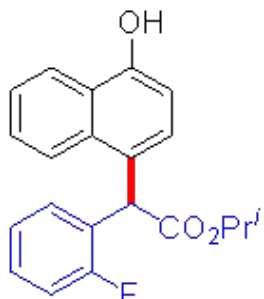

3al

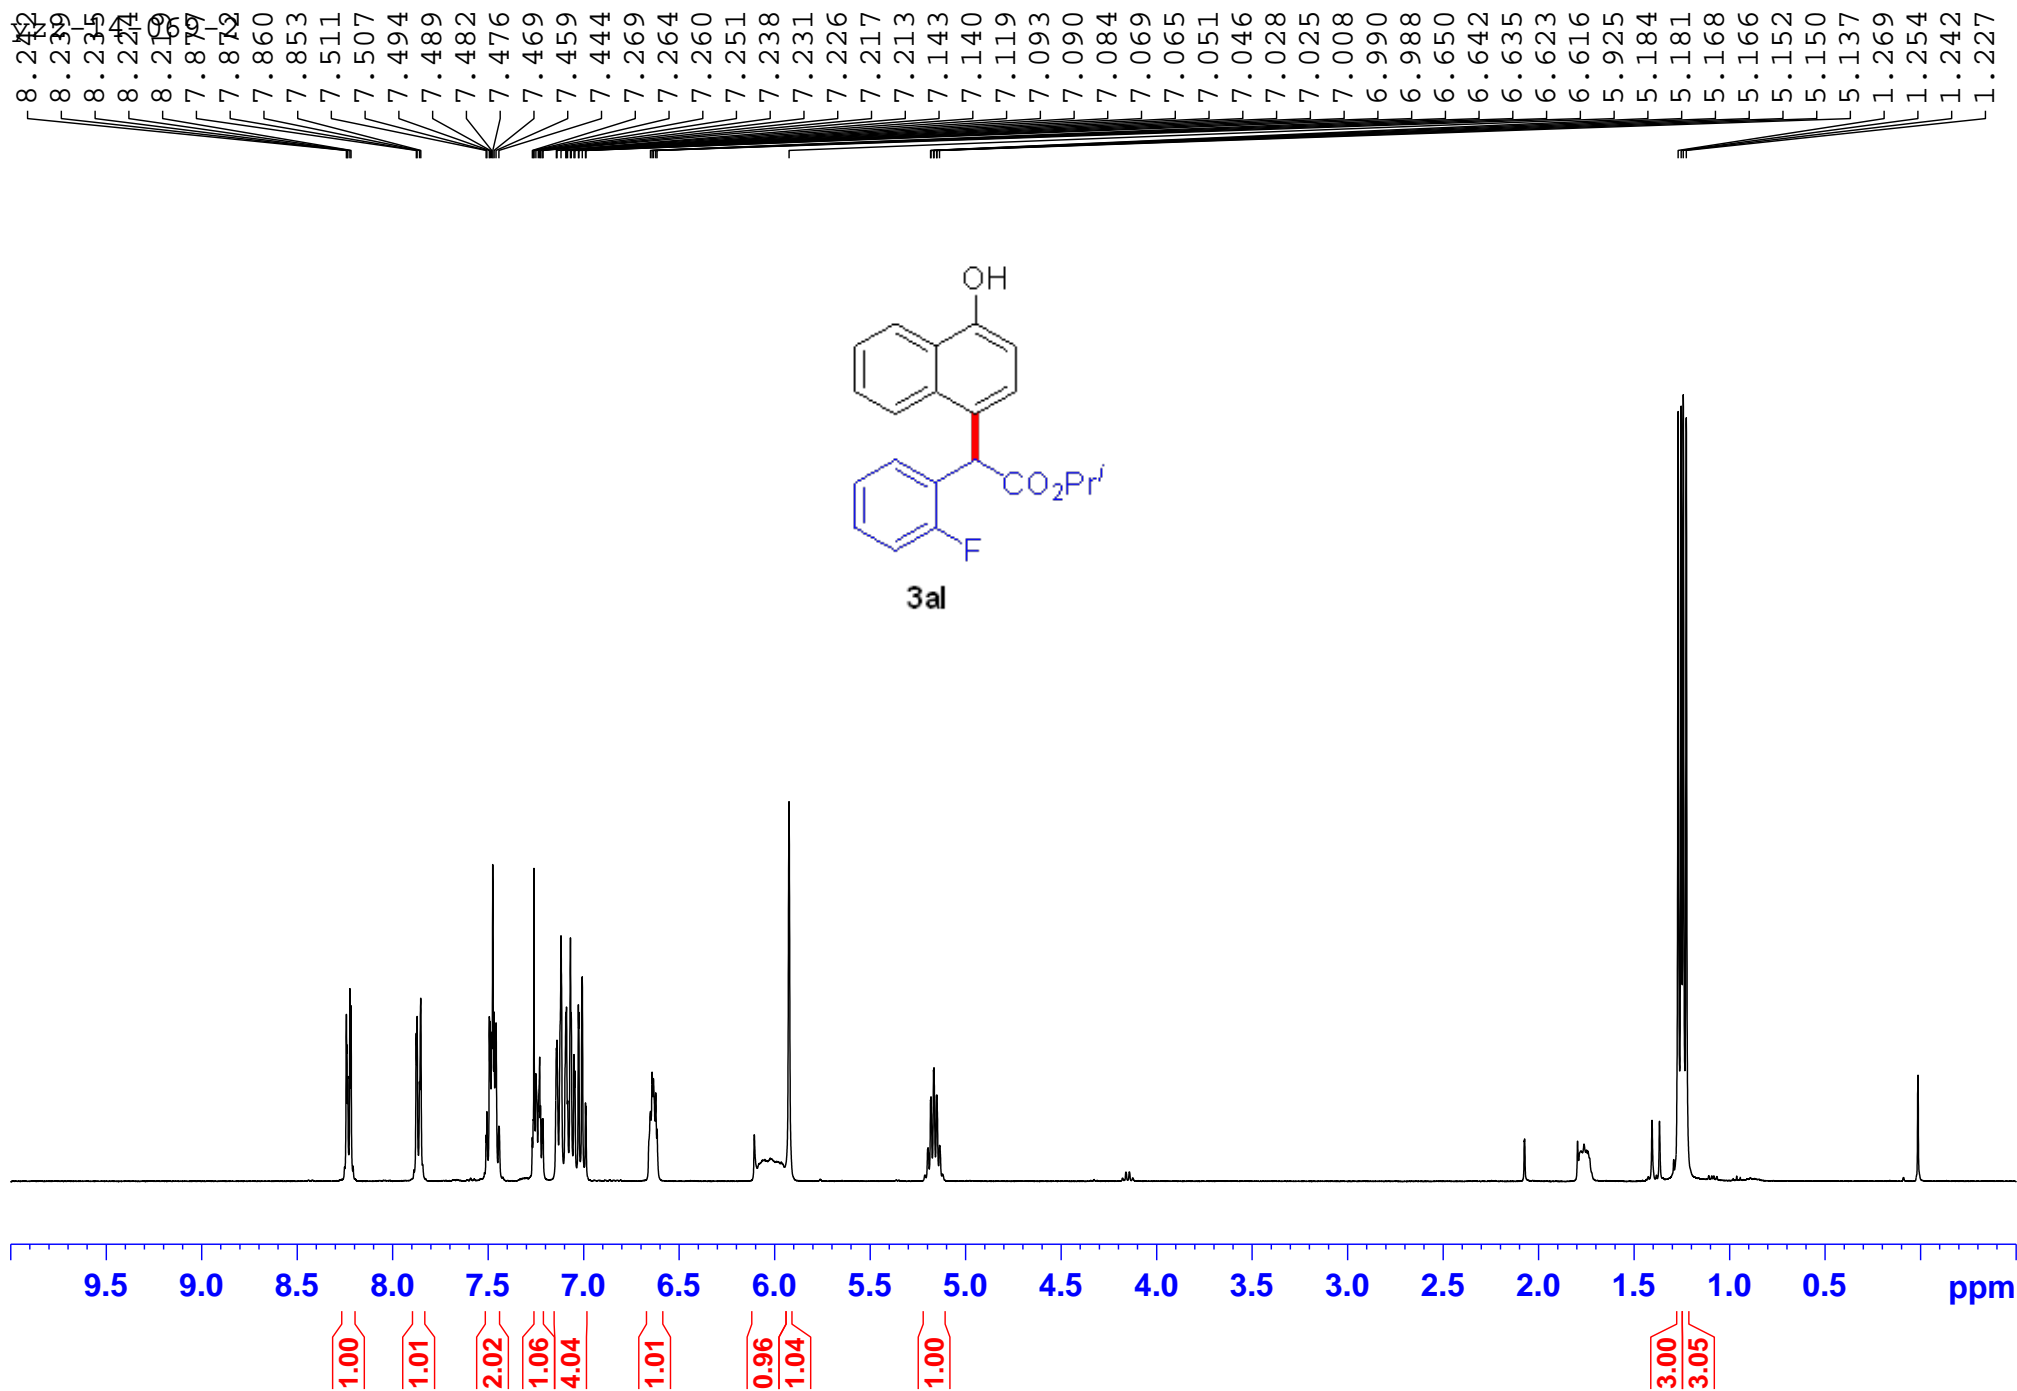

YZZ-14-069-1-C

172.76  
161.76  
159.31  
151.66  
132.62  
130.32  
130.29  
129.02  
128.94  
126.93  
126.16  
125.82  
125.68  
125.07  
124.95  
124.90  
124.09  
124.06  
122.97  
122.65  
115.27  
115.05  
107.94

77.32  
77.00  
76.68  
69.28

46.31  
46.28

21.62  
21.53

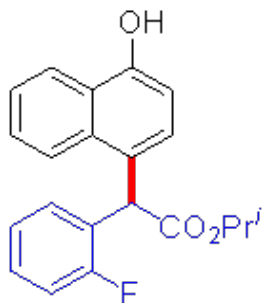

3al

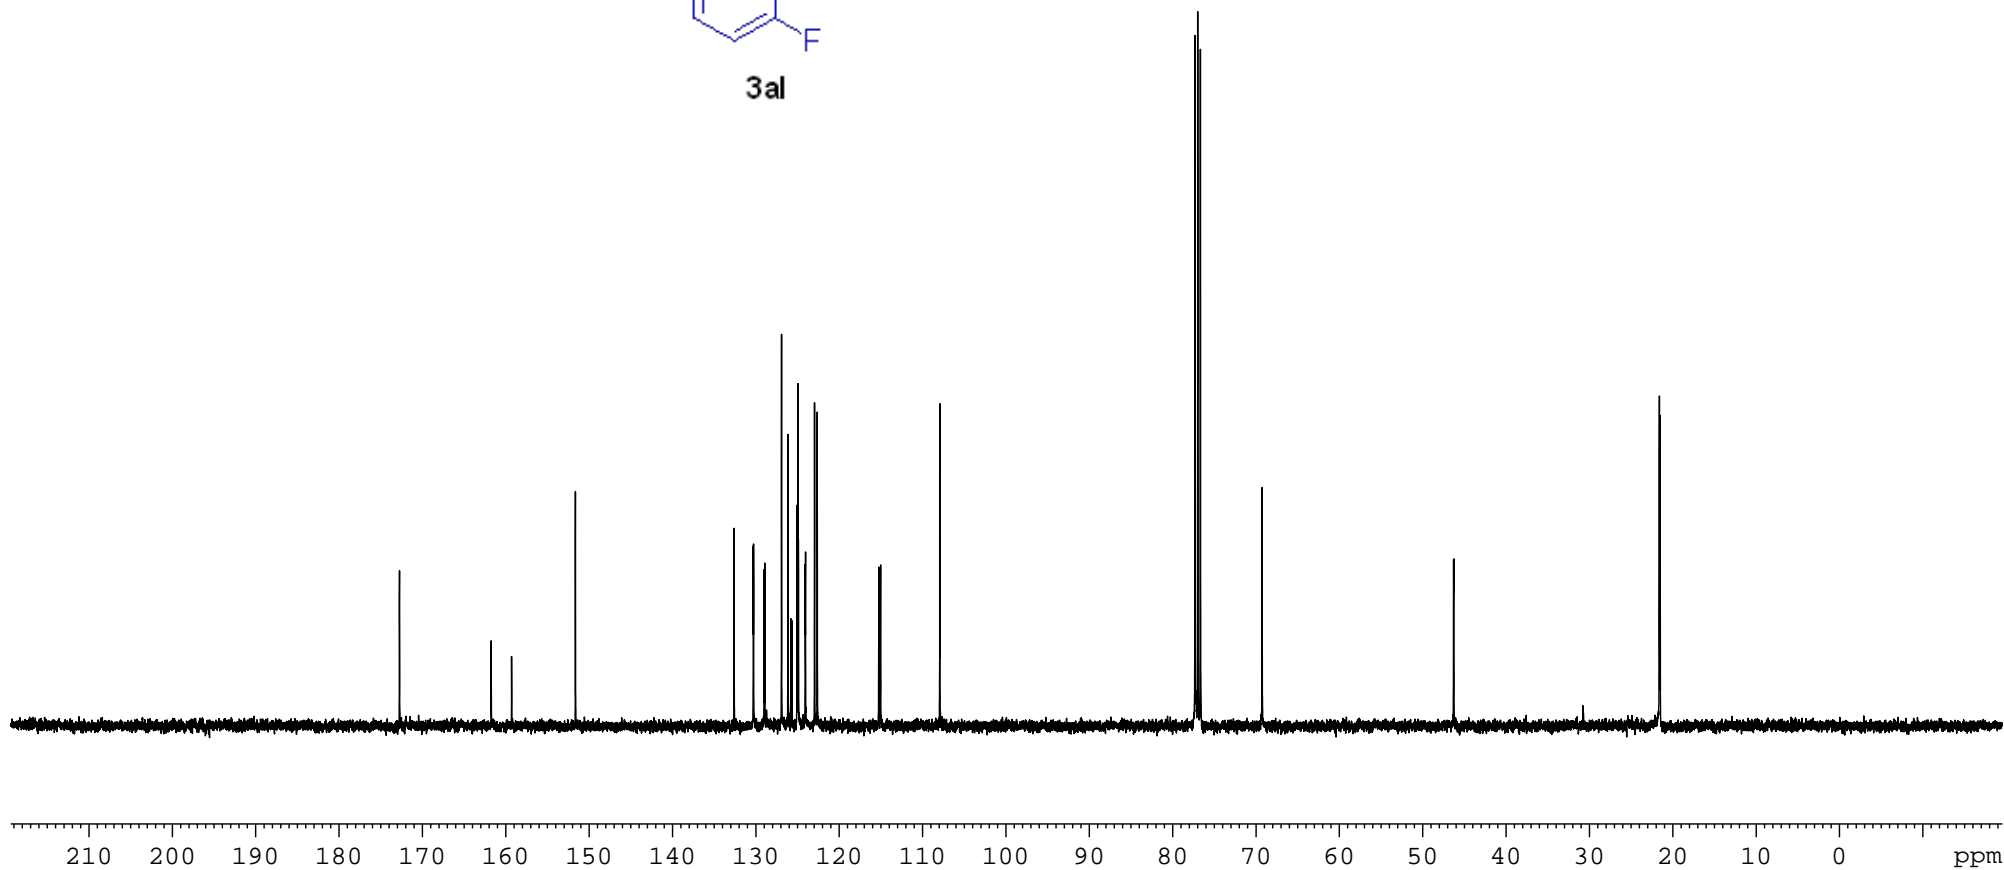

7.753N  
 7.74714  
 7.7431  
 7.73706  
 7.4710  
 7.4633  
 7.454  
 7.439  
 7.436  
 7.419  
 7.416  
 7.260  
 7.195  
 7.191  
 7.176  
 7.172  
 7.123  
 7.120  
 7.114  
 7.104  
 7.101  
 7.095  
 7.085  
 7.082  
 6.722  
 6.697  
 6.687  
 6.678  
 6.668  
 6.027  
 5.783  
 5.766  
 5.737  
 5.194  
 5.178  
 5.163  
 5.147

1.285  
 1.269  
 1.246  
 1.231

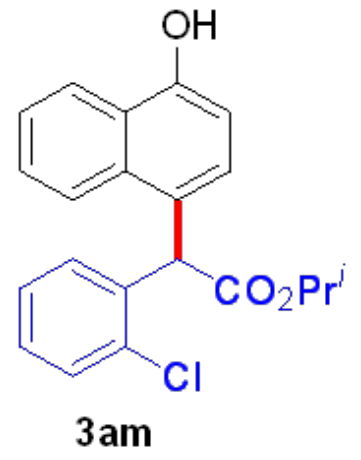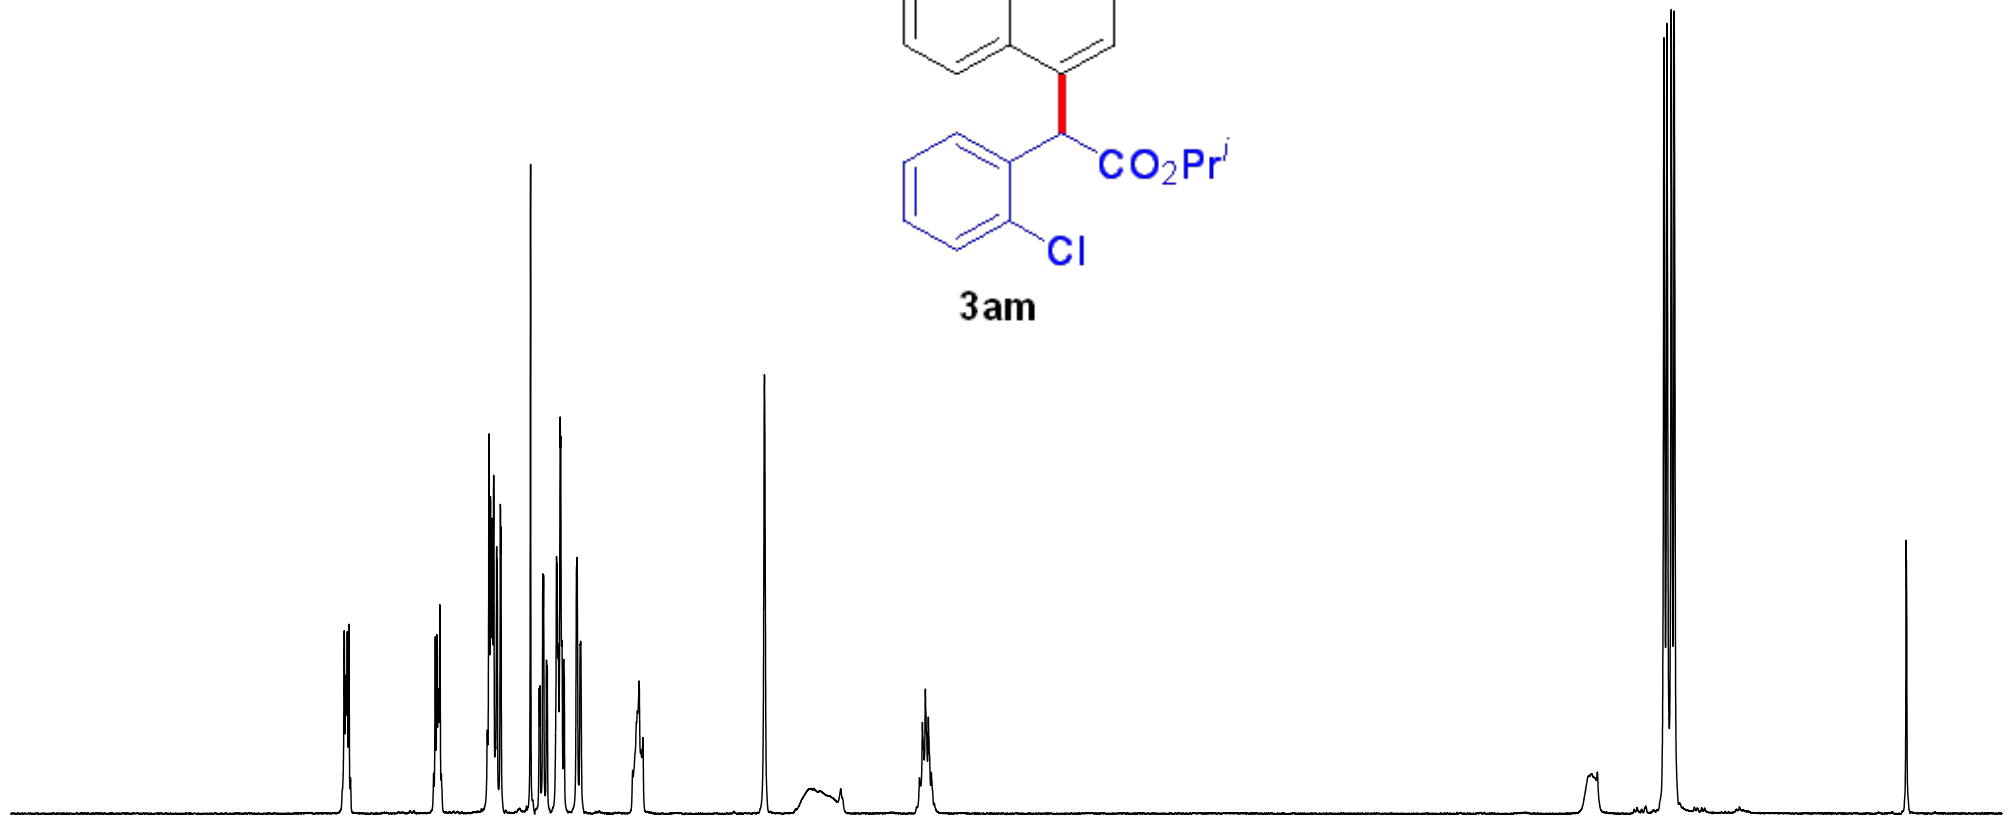

9.5 9.0 8.5 8.0 7.5 7.0 6.5 6.0 5.5 5.0 4.5 4.0 3.5 3.0 2.5 2.0 1.5 1.0 0.5 ppm

1.01 1.01 3.02 1.01 2.01 1.00 1.01 1.00 1.03 1.00 3.05 3.05

yzz-14-060-2-c

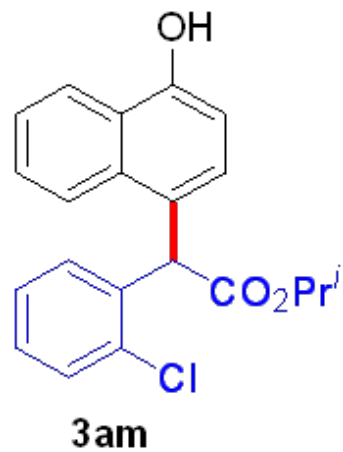

— 172.75

151.66  
136.43  
134.20  
132.62  
130.32  
129.42  
128.58  
126.99  
126.87  
126.12  
125.18  
125.13  
125.01  
123.14  
122.61  
107.91

77.32  
77.00  
76.68  
— 69.27

— 50.80

21.69  
21.56

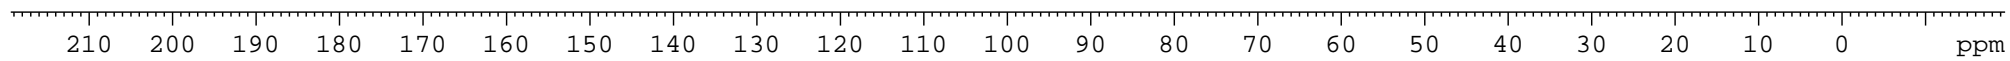

YZZ-14-070-1

7.7342  
7.7301  
7.7274  
7.7190  
7.7160  
7.6277  
7.6233  
7.608  
7.604  
7.469  
7.465  
7.455  
7.445  
7.441  
7.260  
7.143  
7.140  
7.125  
7.122  
7.116  
7.103  
7.098  
7.081  
7.062  
7.027  
7.021  
7.008  
7.003  
6.650  
6.630  
6.241  
6.022  
5.234  
5.218  
5.202  
5.187  
5.171

1.303  
1.288  
1.261  
1.245

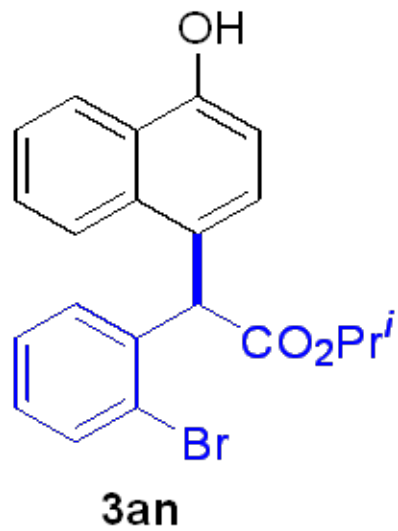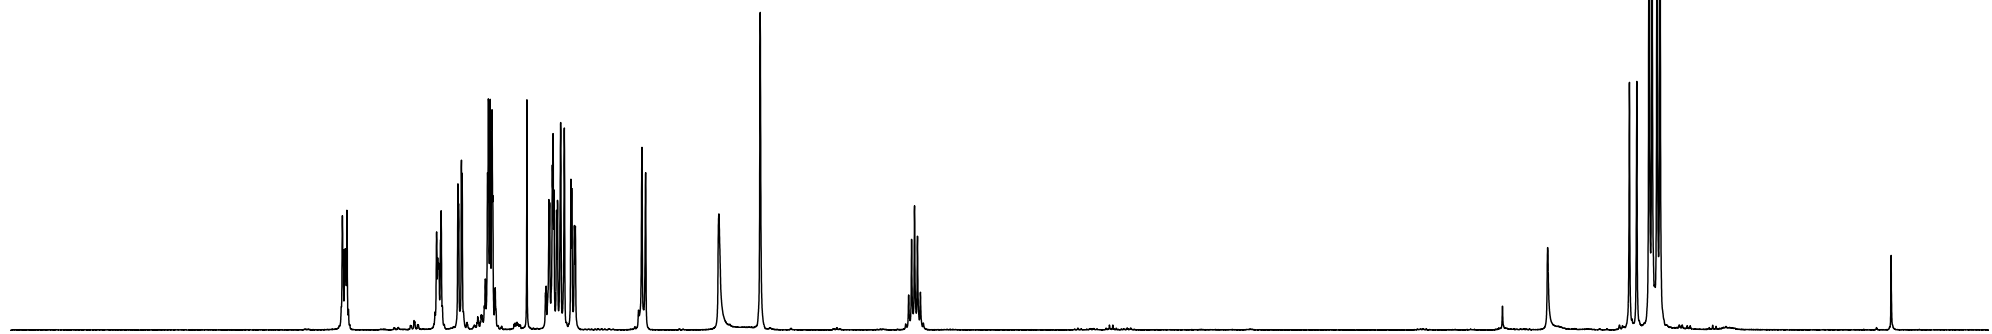

9 8 7 6 5 4 3 2 1 0 ppm

1.02 1.01 1.01 2.08 4.02 1.02 0.94 1.00 1.00 3.03 3.01

YZZ-14-070-1-C

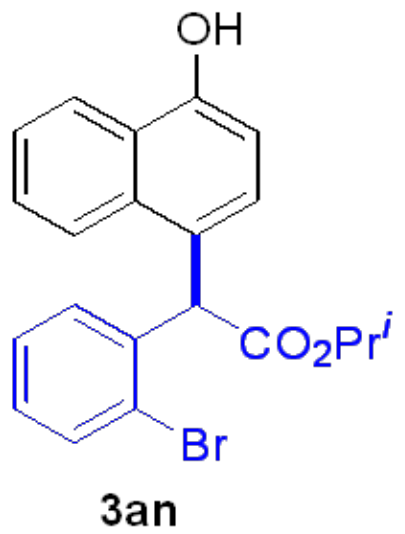

— 172.56

151.67  
138.15  
132.78  
132.62  
130.53  
128.83  
127.49  
127.00  
126.10  
125.45  
125.14  
125.05  
125.01  
123.23  
122.60  
107.88

77.32  
77.00  
76.68  
— 69.21

— 53.49

21.73  
21.57

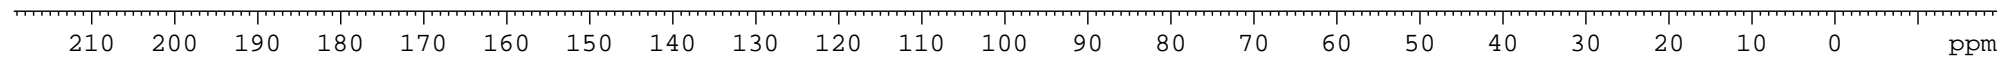



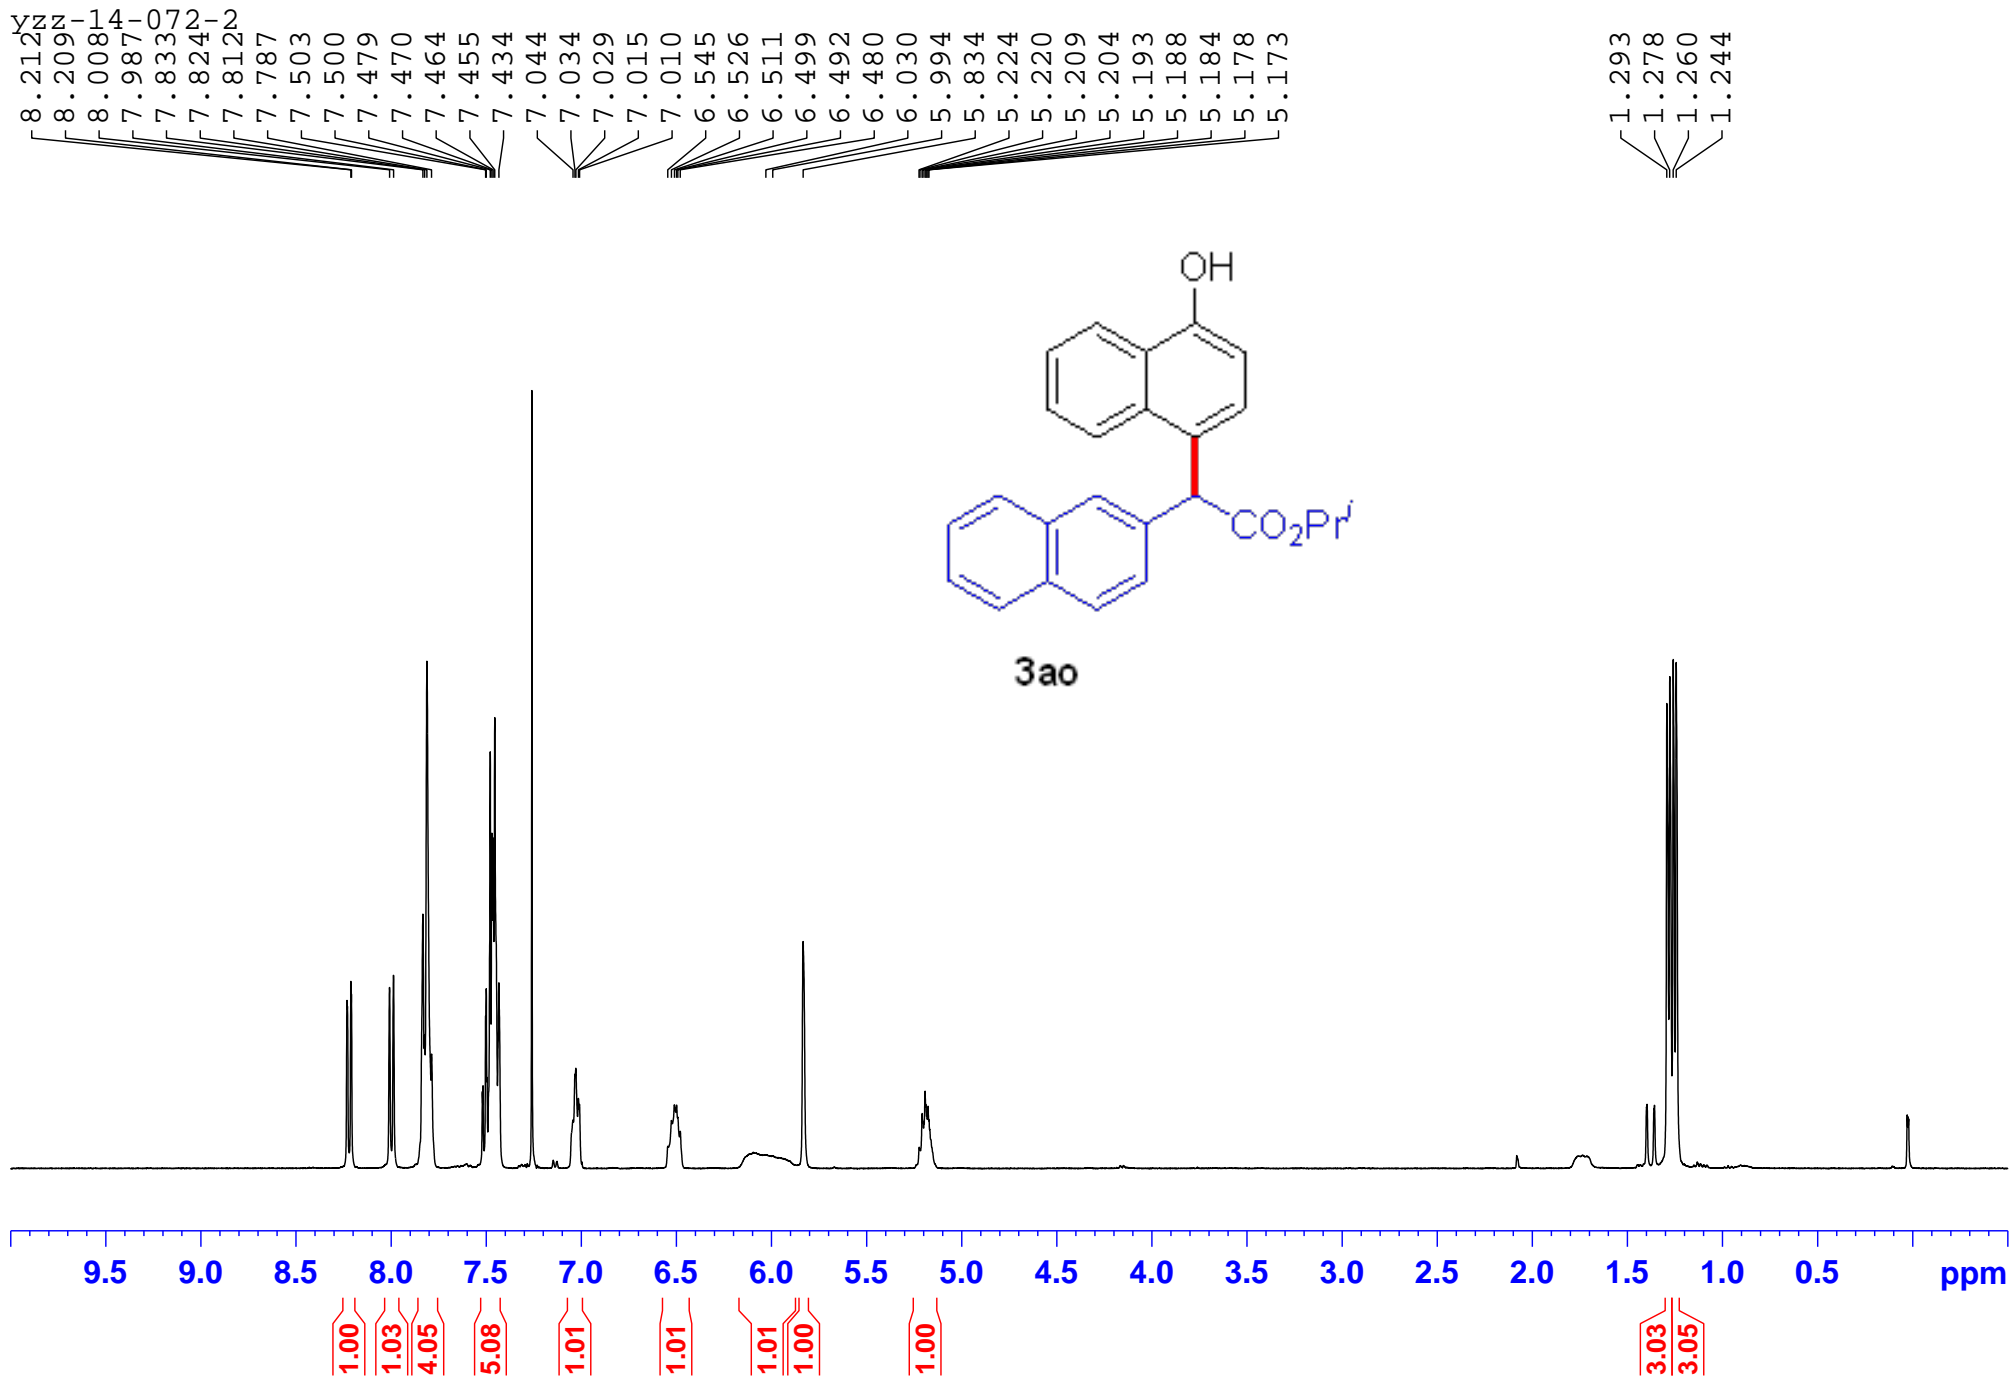

yzz-14-072-1-c

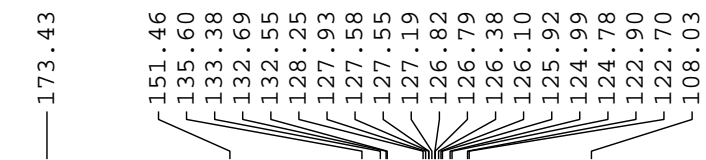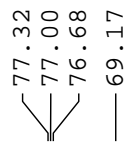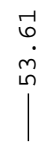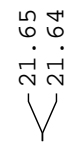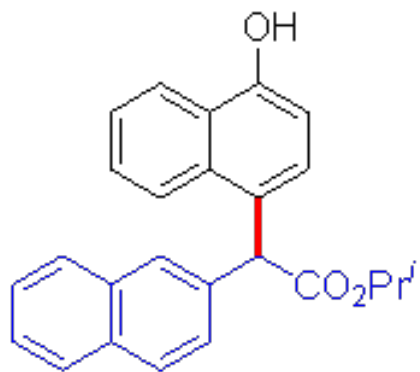

3ao

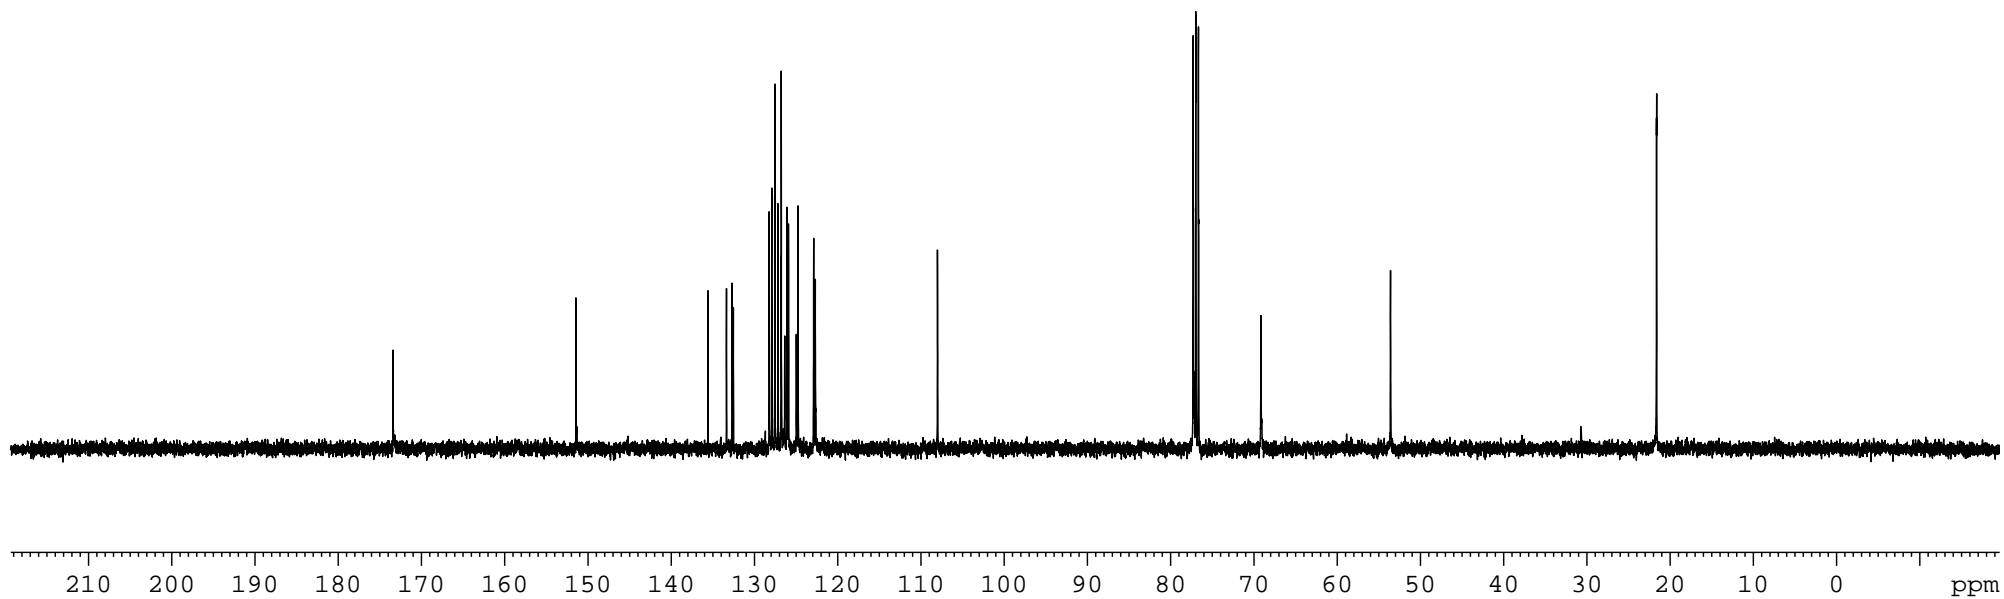

8.126  
8.124  
8.105  
8.103  
7.678  
7.656  
7.316  
7.313  
7.307  
7.303  
7.295  
7.287  
7.282  
7.269  
7.265  
7.222  
7.220  
7.202  
7.198  
7.183  
7.165  
7.162  
7.159  
7.153  
7.150  
7.145  
7.142  
7.135  
6.626  
5.652  
4.880

3.654  
3.318  
3.314  
3.310  
3.306  
3.302

— 2.121

yzz-14-138-2

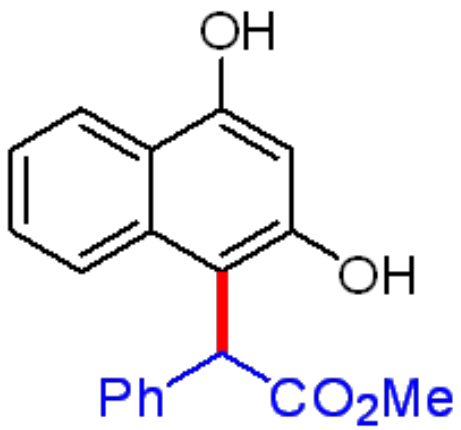

3ba

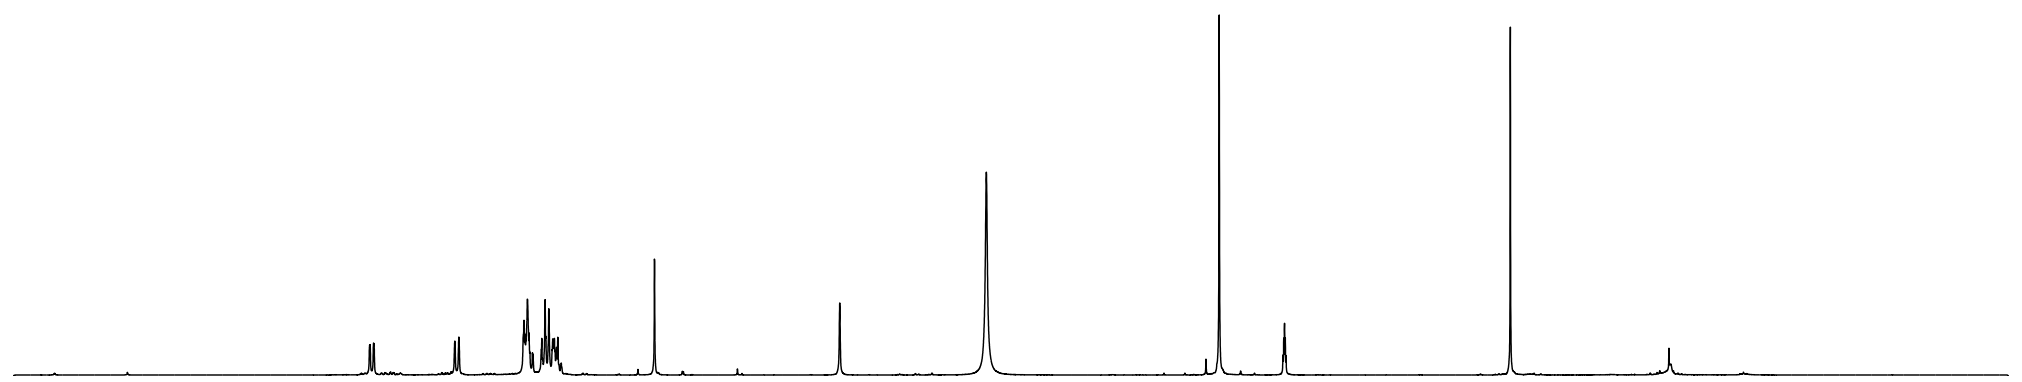

9.5 9.0 8.5 8.0 7.5 7.0 6.5 6.0 5.5 5.0 4.5 4.0 3.5 3.0 2.5 2.0 1.5 1.0 0.5 ppm

1.03  
1.06  
3.04  
4.06  
1.03  
1.00  
3.04  
2.02

yzz-14-138-2-c

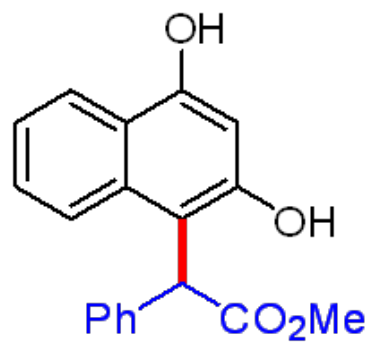

3ba

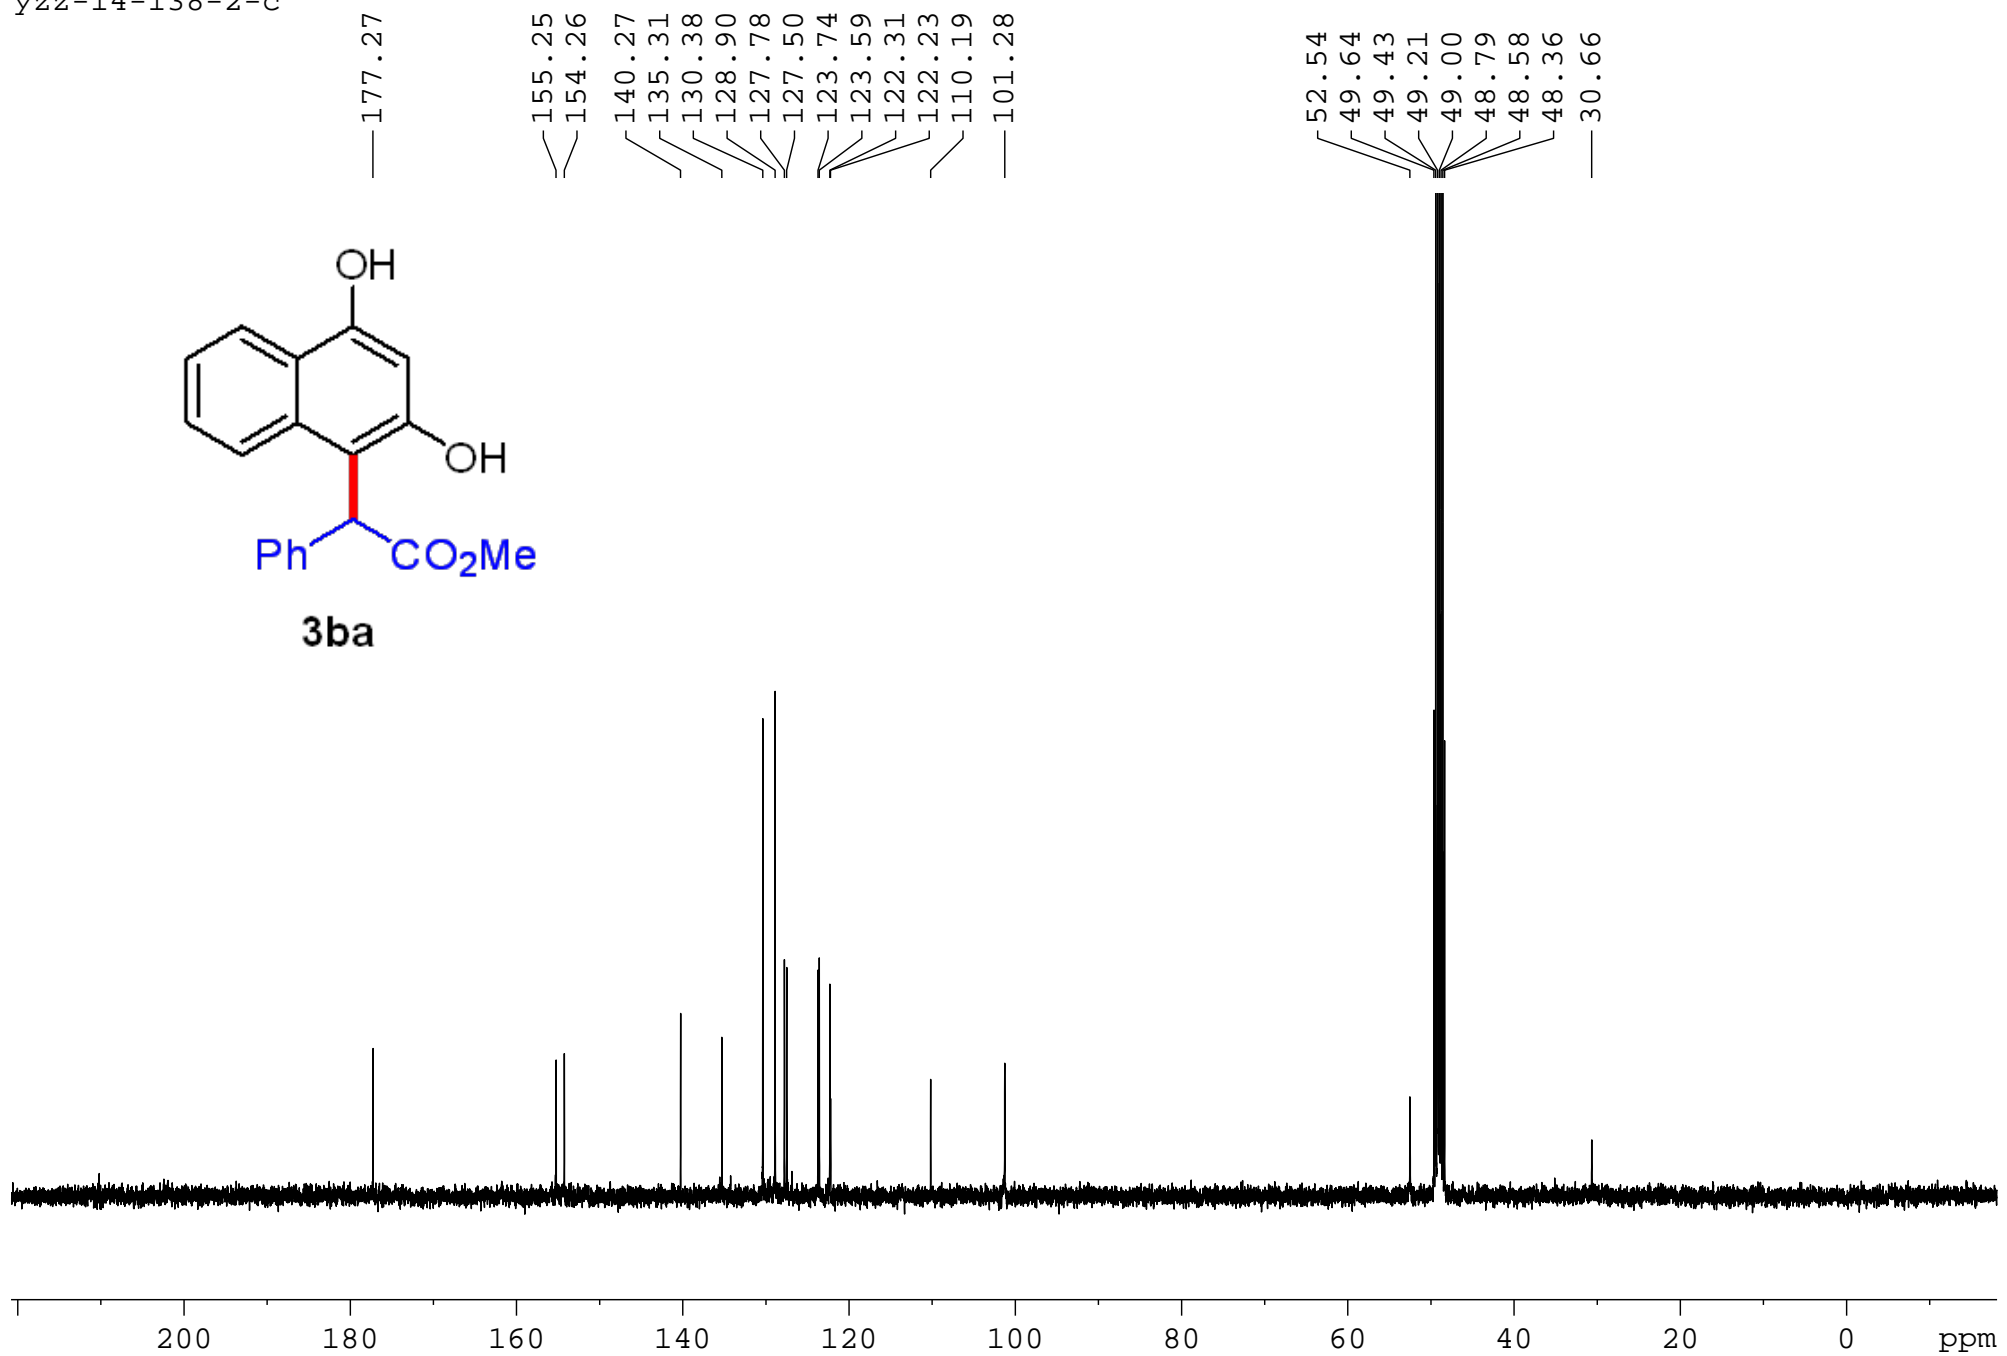

yzz-15-027-1

8.152  
8.129  
7.349  
7.338  
7.297  
7.259  
7.173  
7.168  
7.131  
7.125  
7.108  
7.102  
7.038  
7.018  
6.487  
6.468  
5.927  
5.596

3.833  
3.786

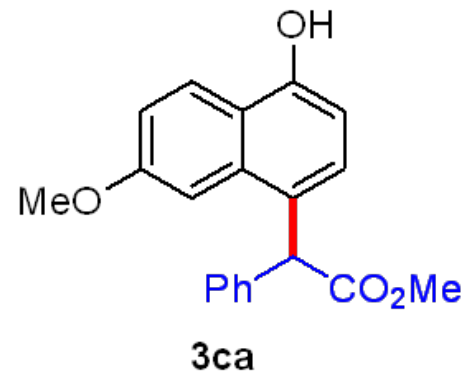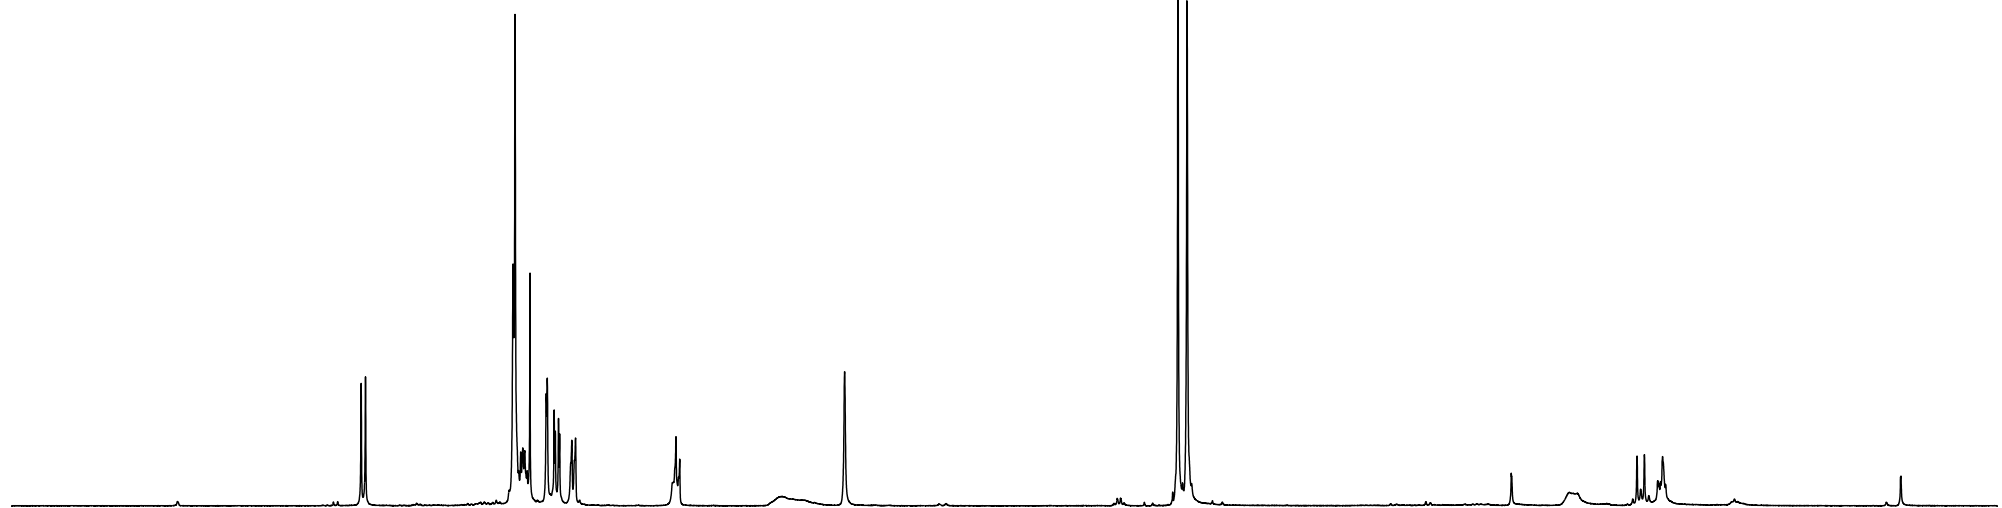

9

8

7

6

5

4

3

2

1

0 ppm

0.99

5.09

1.01

1.08

1.00

1.00

0.99

1.00

3.08

3.07

yzz-15-027-1-c

— 173.89  
— 158.41  
— 151.55  
— 137.89  
— 134.06  
— 128.94  
— 128.63  
— 127.34  
— 127.21  
— 125.49  
— 124.38  
— 120.03  
— 116.95  
— 106.03  
— 102.35  
— 77.32  
— 77.00  
— 76.68

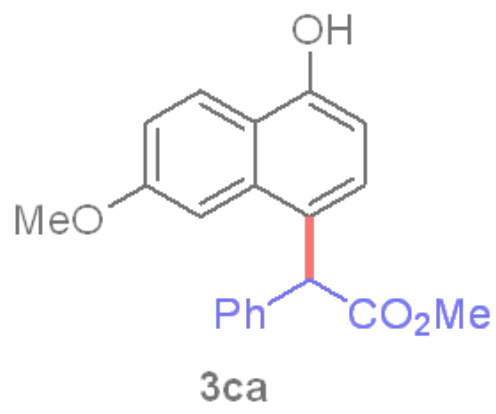

— 55.13  
— 53.74  
— 52.49

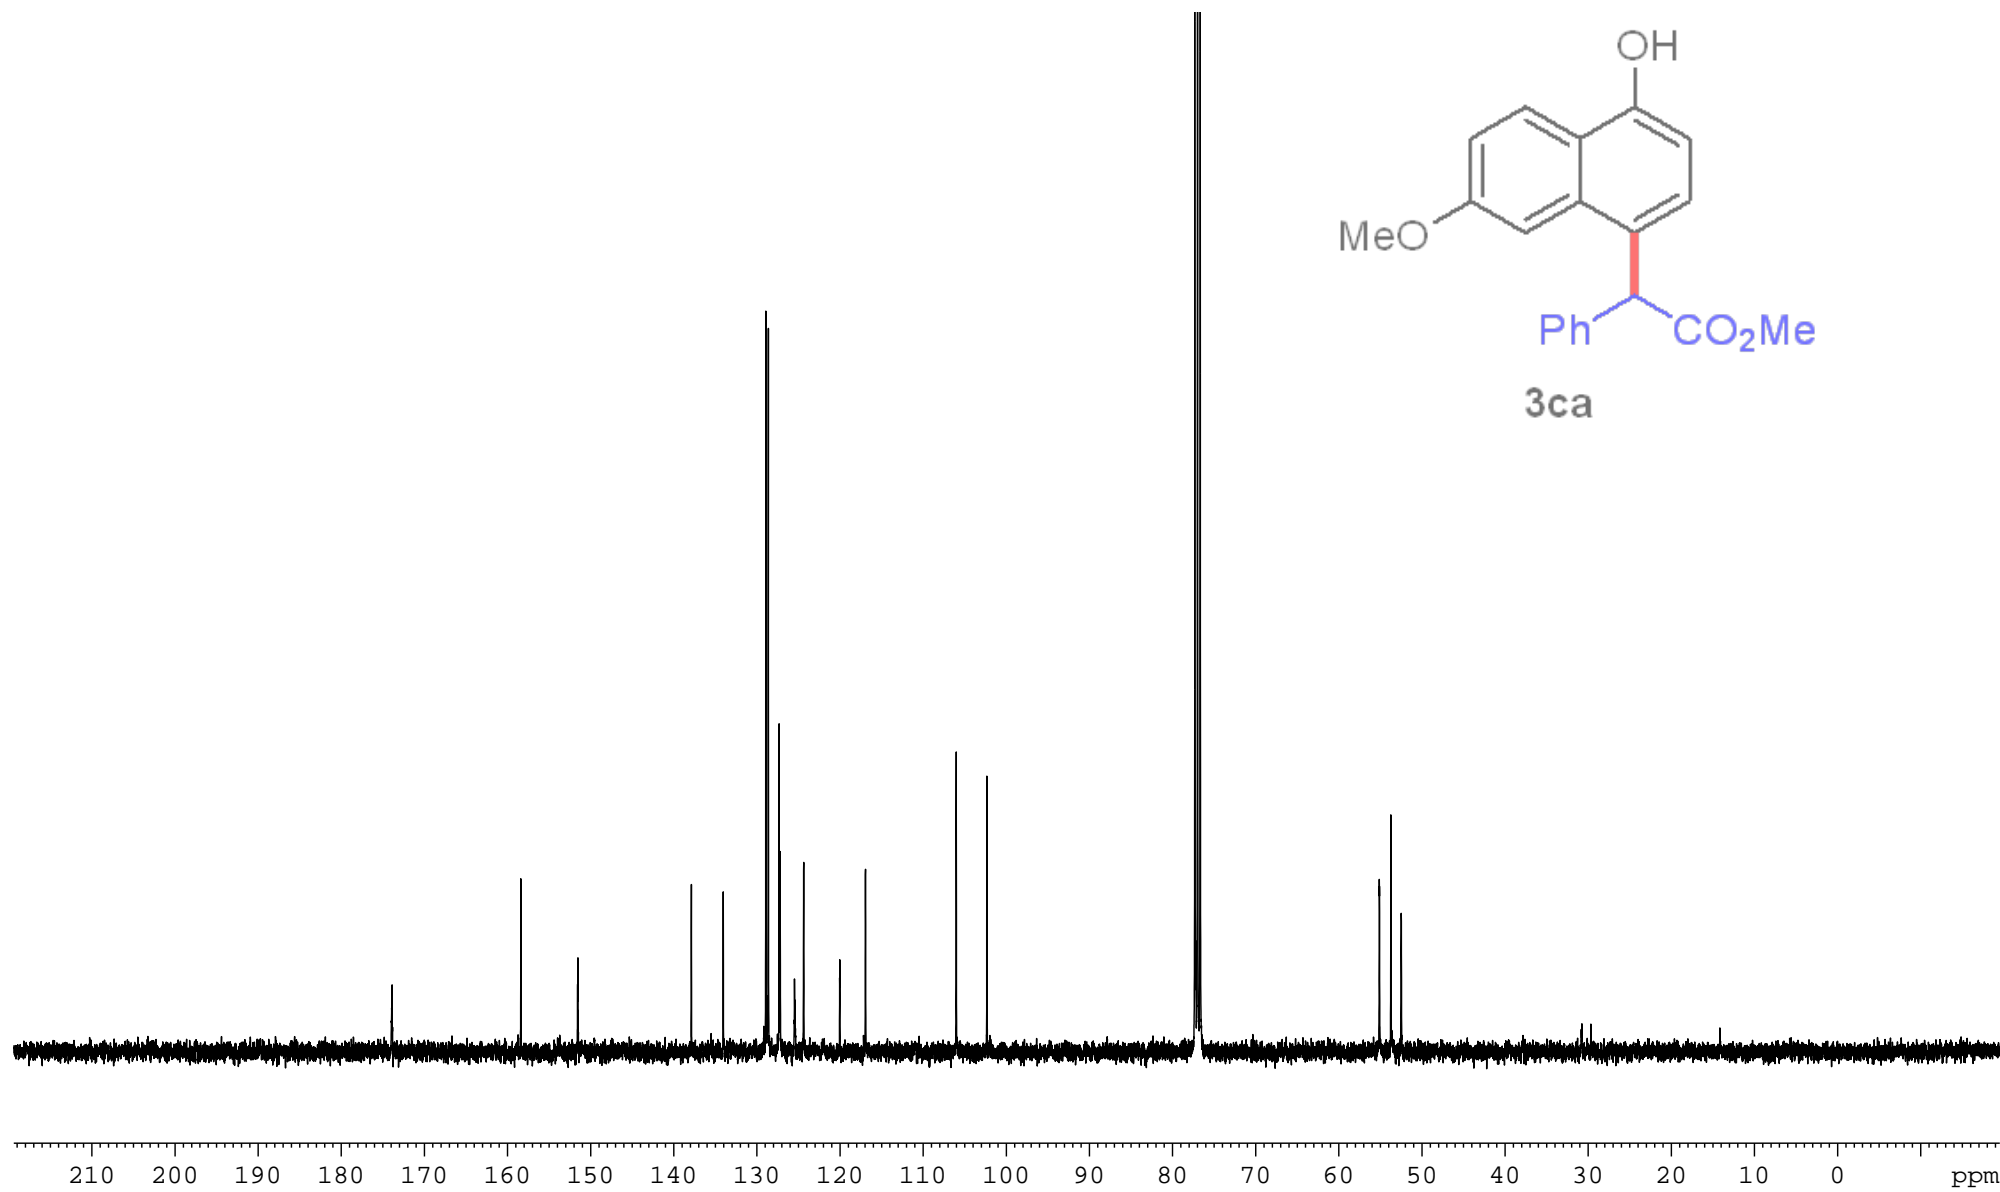

7.8294  
7.8061  
7.5045  
7.4972  
7.3669  
7.3631  
7.359  
7.345  
7.342  
7.328  
7.324  
7.312  
7.308  
7.305  
7.301  
7.291  
7.283  
7.274  
7.267  
7.260  
7.179  
7.172  
7.155  
7.149  
6.920  
6.900  
6.547  
6.527  
6.321  
5.696

3.895  
3.795

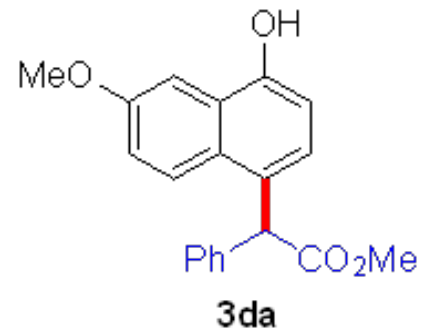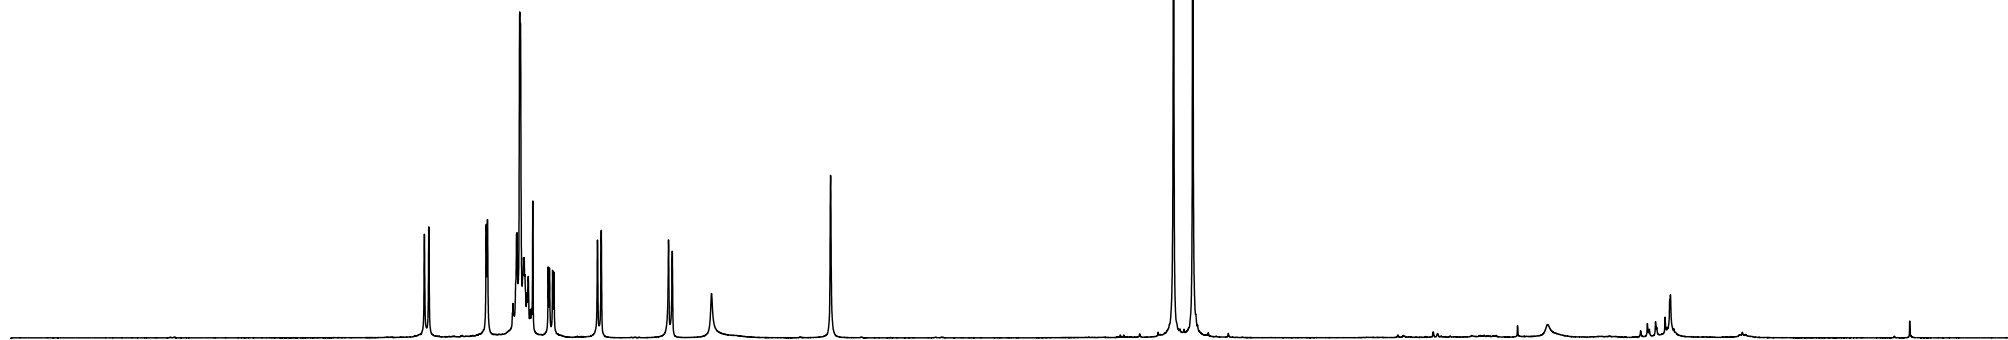

9.5 9.0 8.5 8.0 7.5 7.0 6.5 6.0 5.5 5.0 4.5 4.0 3.5 3.0 2.5 2.0 1.5 1.0 0.5 ppm

1.04  
1.07  
5.08  
1.04  
1.02  
1.01  
0.99  
1.00  
3.04  
3.03

yzz-15-029-1-c

— 174.30  
— 156.87  
— 150.52  
138.00  
128.88  
128.61  
127.99  
127.30  
126.33  
126.08  
124.61  
124.07  
119.42  
108.51  
— 101.06  
77.32  
77.21  
77.00  
76.68  
55.28  
53.31  
52.61

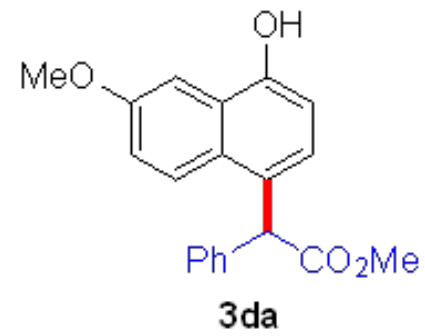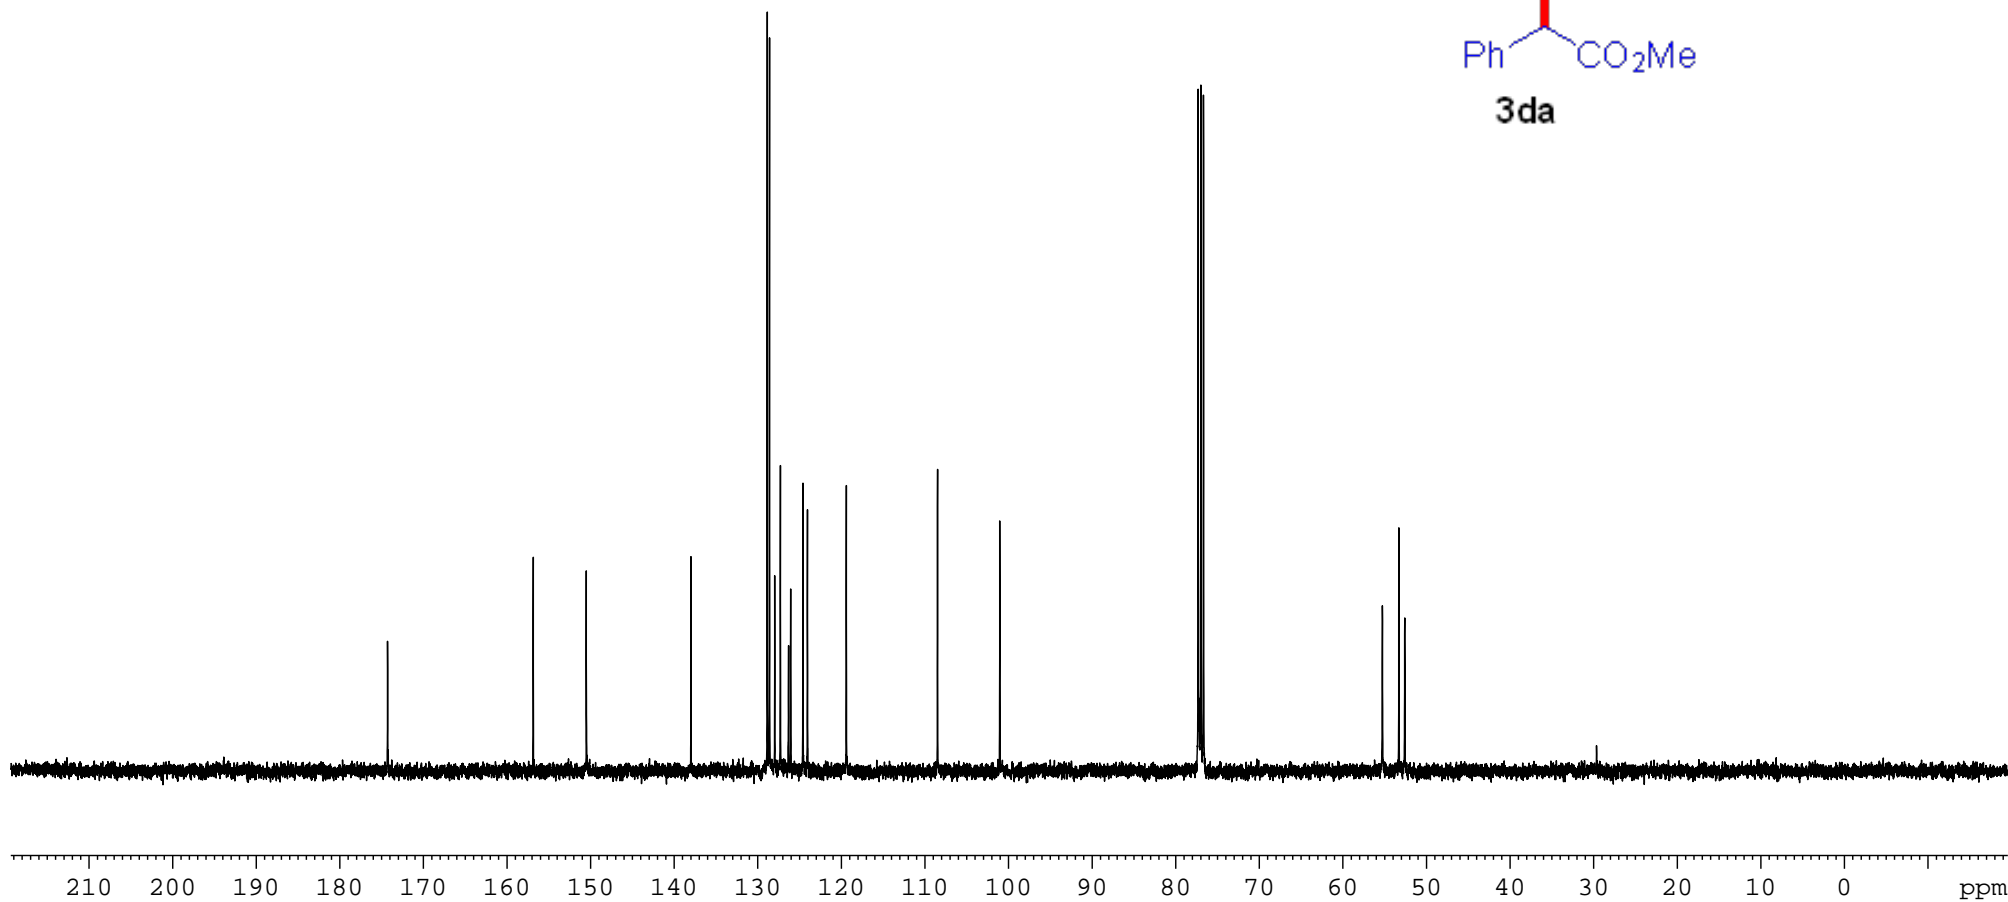



yzz-15-043-1

8.984  
8.068  
8.049  
8.046  
7.932  
7.910  
7.367  
7.348  
7.331  
7.313  
7.296  
7.273  
7.260  
7.142  
7.122  
6.975  
6.673  
6.653  
5.705

3.970  
3.797

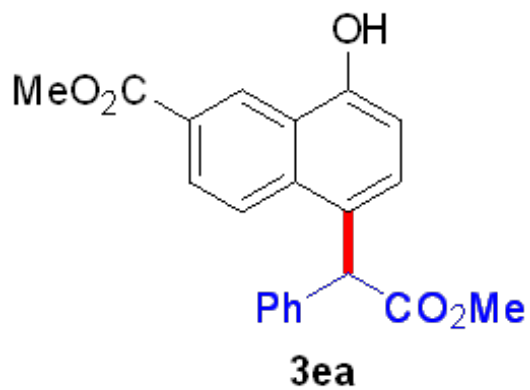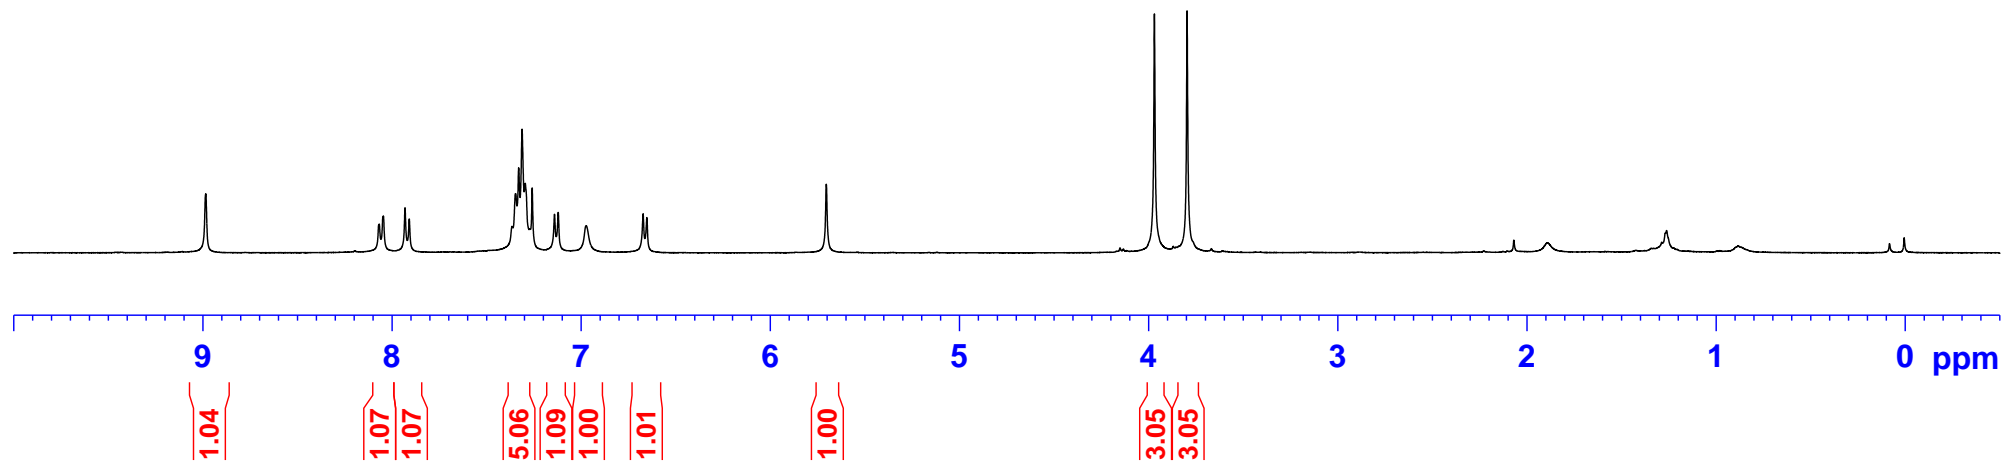

yzz-15-043-1-c

—174.09

—167.48

—152.90

137.58

134.66

129.41

128.87

128.75

127.48

126.27

126.10

125.99

124.29

123.13

—108.80

77.32

77.00

76.68

53.11

52.72

52.29

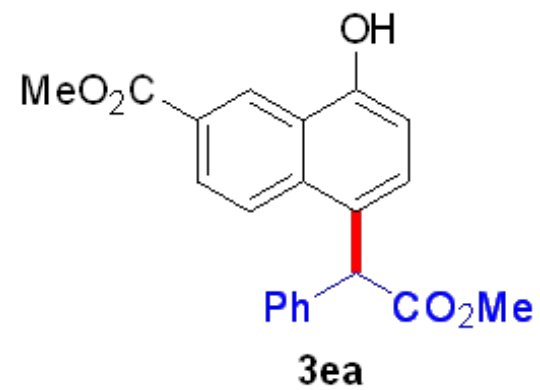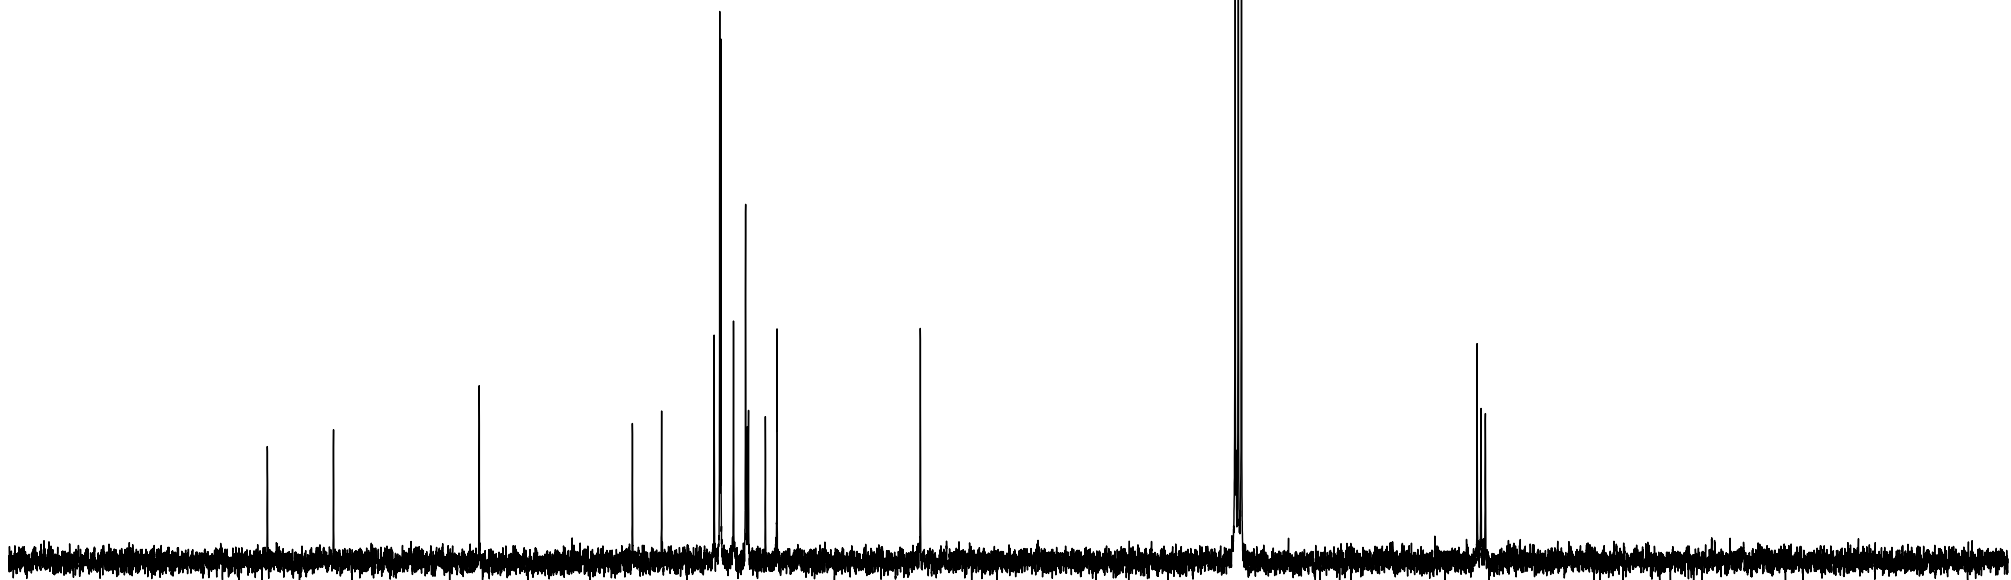

190 180 170 160 150 140 130 120 110 100 90 80 70 60 50 40 30 20 10 ppm

yyy-14-137-1

8.343  
8.338  
7.755  
7.733  
7.561  
7.556  
7.539  
7.534  
7.362  
7.358  
7.341  
7.317  
7.305  
7.285  
7.260  
7.000  
6.980  
6.509  
6.489  
6.140  
5.653

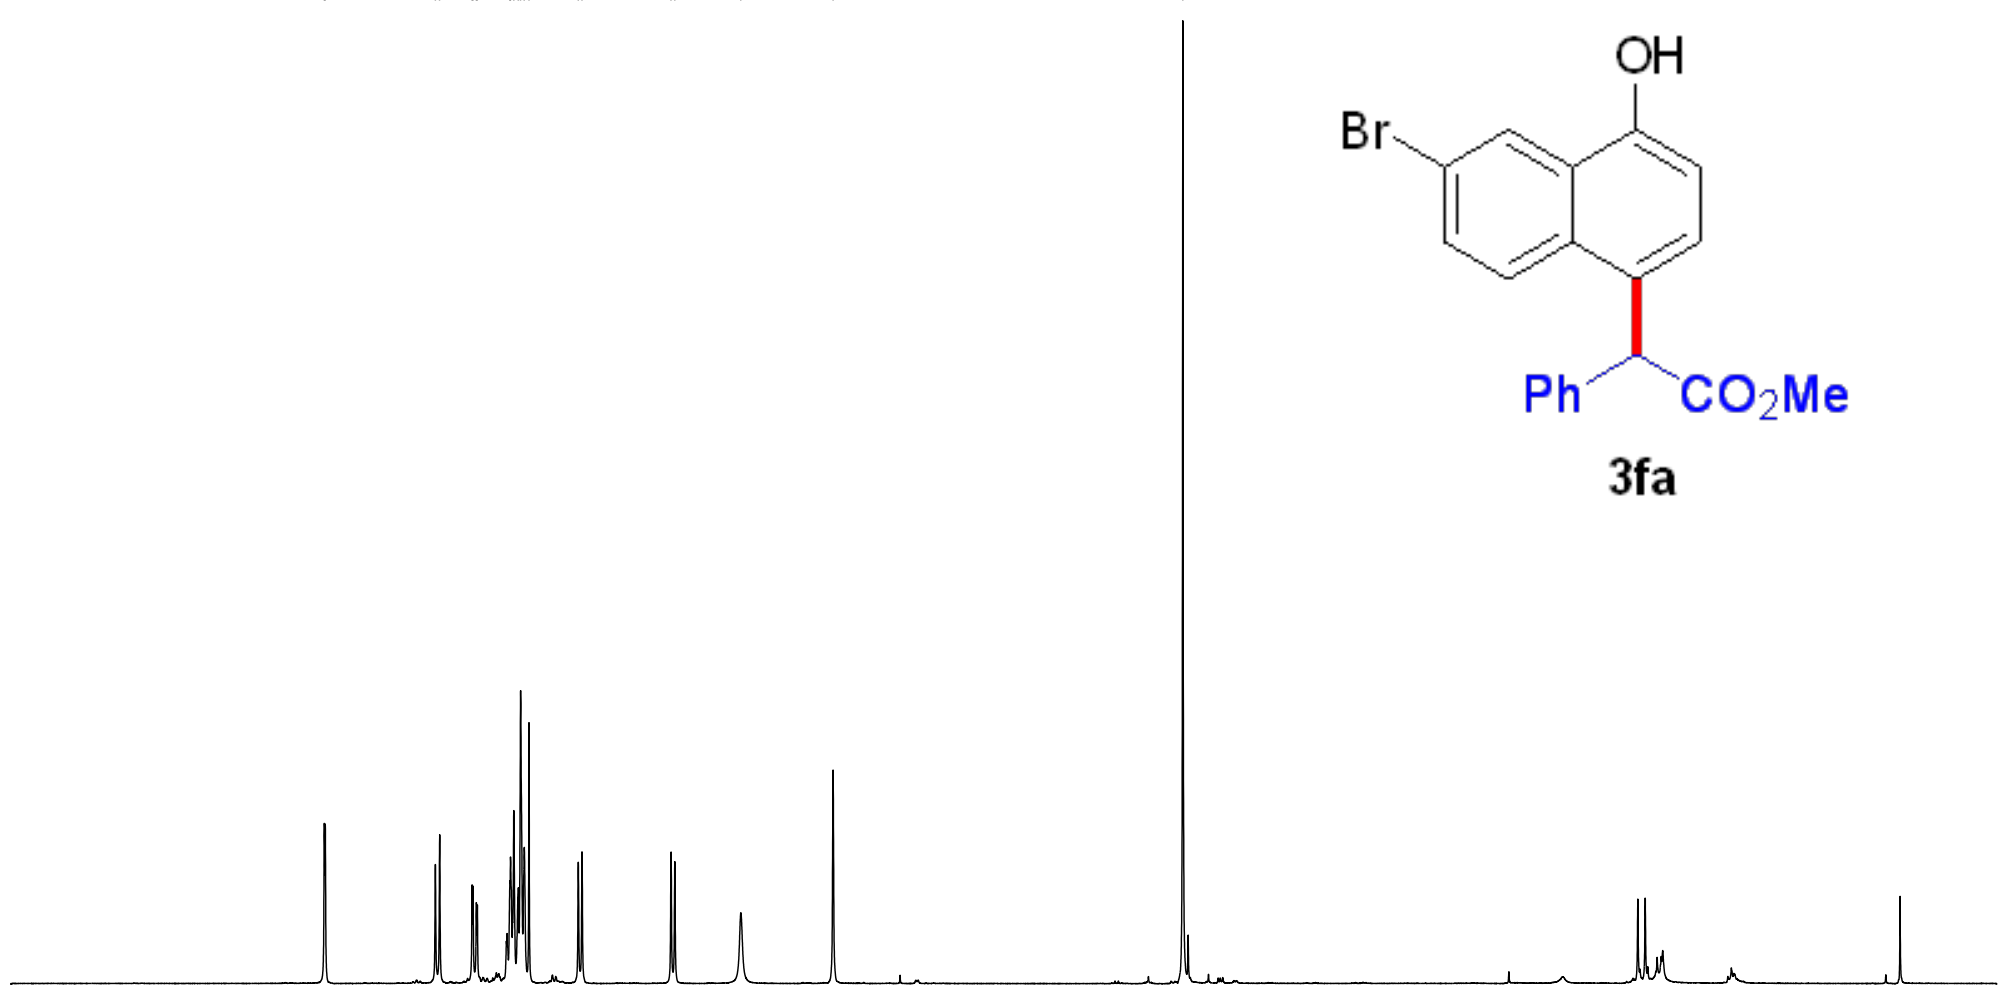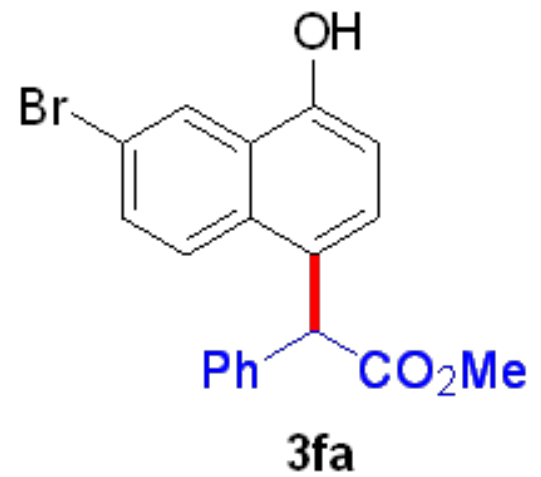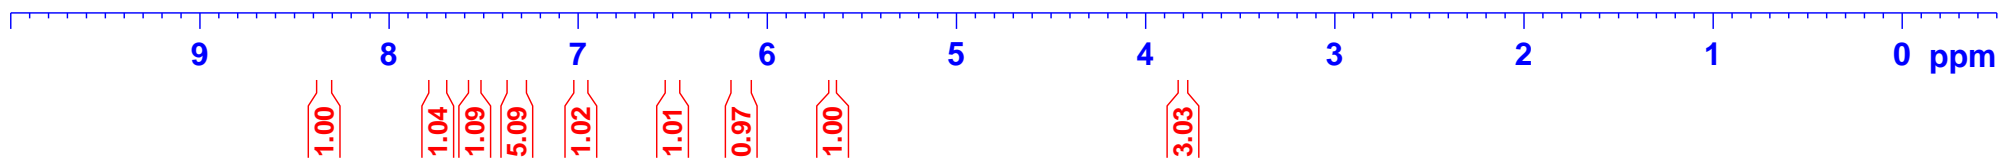

yzz-14-137-1

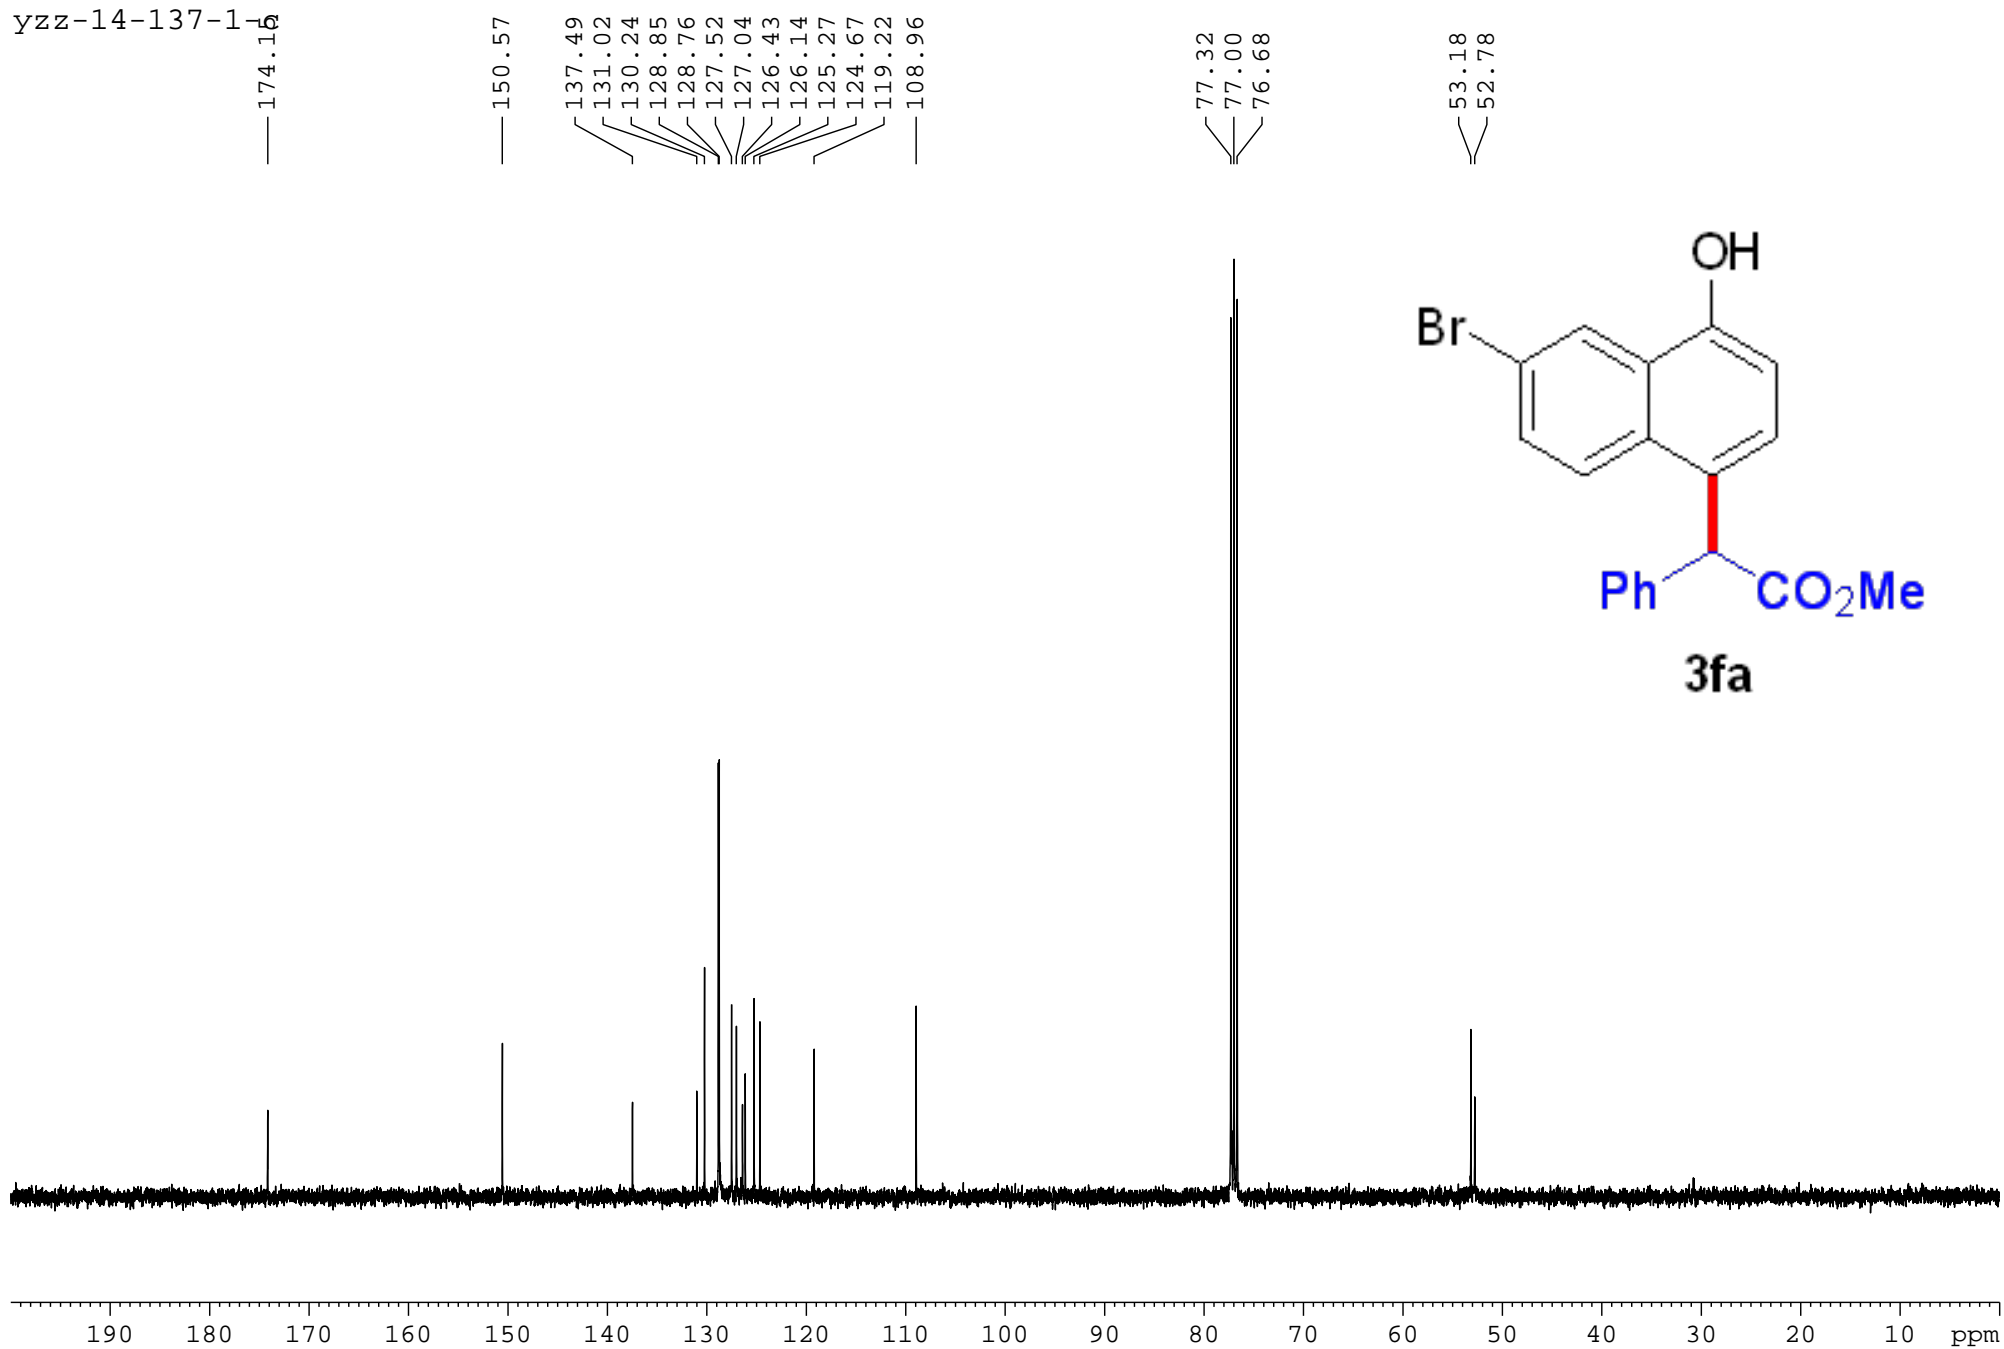

yzz-14-056-2

7.389  
7.372  
7.352  
7.328  
7.325  
7.311  
7.303  
7.284  
7.260  
7.254  
7.234  
7.213  
6.820  
6.800  
6.657  
6.638  
6.415  
6.395  
5.559  
5.198  
5.183  
5.167  
5.151  
5.136

1.318  
1.303  
1.249  
1.234

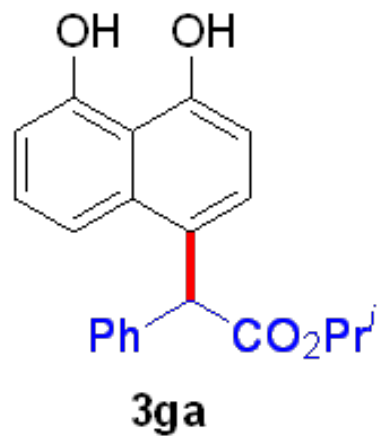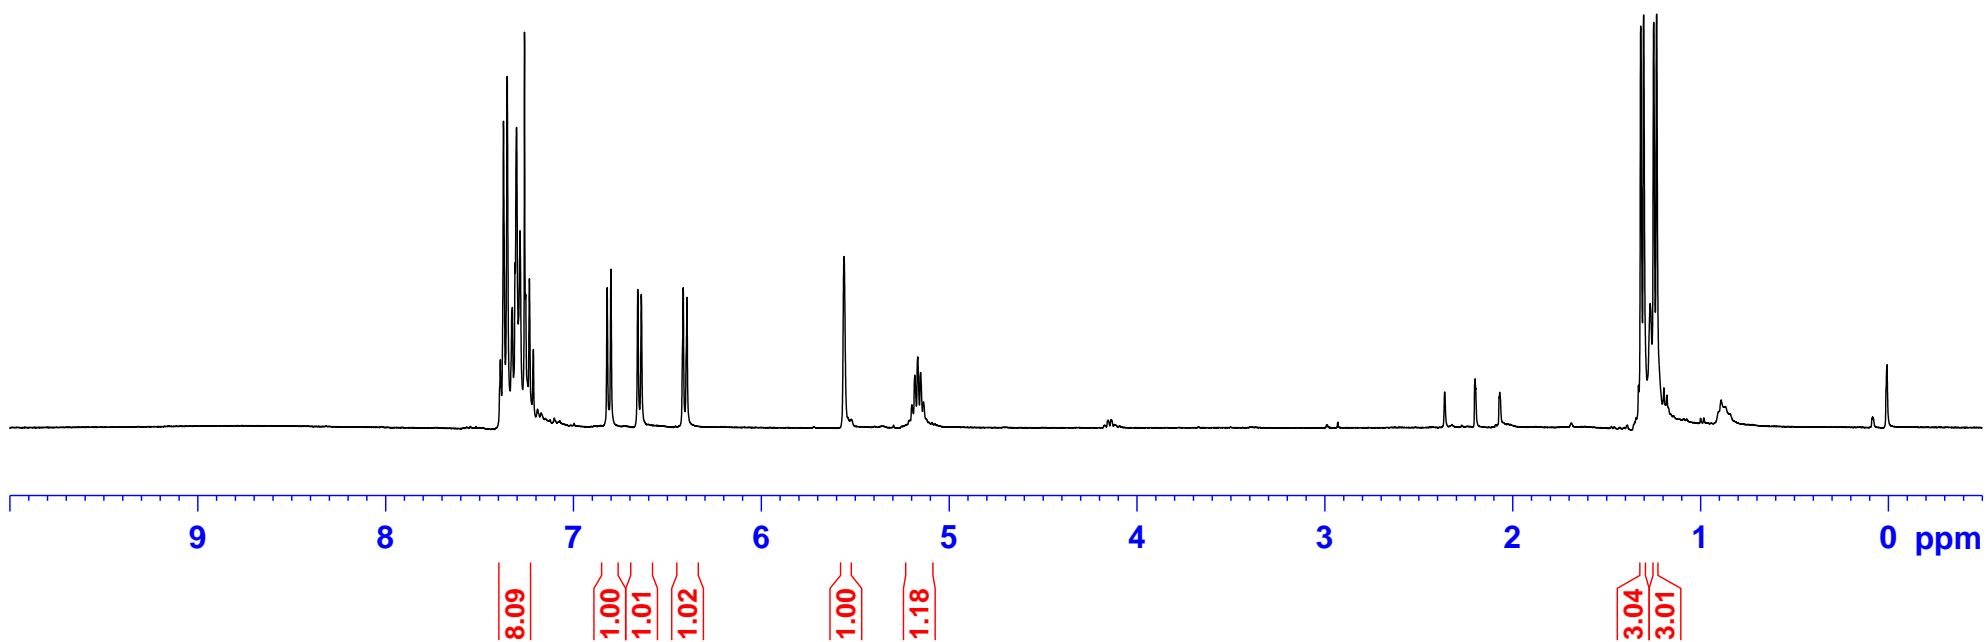

yzz-14-056-1

— 174.60

154.26  
153.16

137.53  
134.74  
128.96  
128.72  
127.64  
127.42  
127.39  
125.83  
114.94  
114.70  
109.53  
108.21

77.32  
77.00  
76.68  
— 69.61

— 54.15

21.67  
21.52

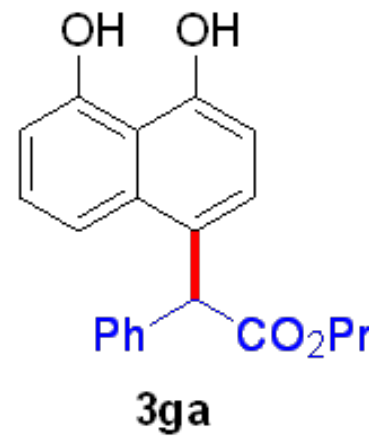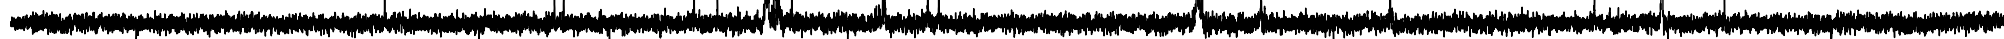

210 200 190 180 170 160 150 140 130 120 110 100 90 80 70 60 50 40 30 20 10 0 ppm

yzz-15-024-1

8.044  
8.023  
7.523  
7.515  
7.512  
7.502  
7.484  
7.480  
7.379  
7.377  
7.371  
7.364  
7.290  
7.270  
7.260  
7.241  
7.238  
7.223  
7.221  
6.890  
6.870  
5.776  
5.489

3.798

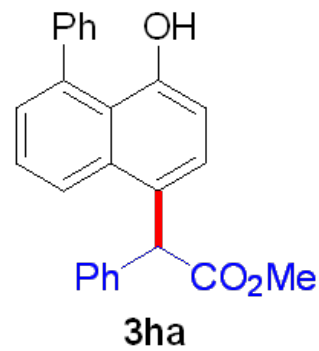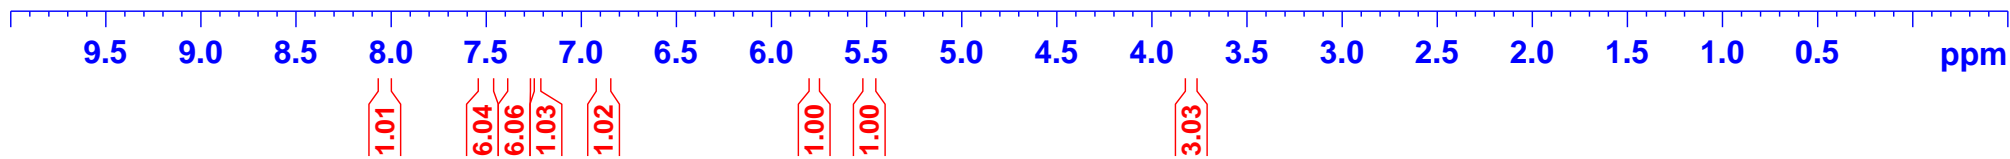

yyy-15-024-1-

— 173.56

152.83  
141.23  
138.12  
137.02  
133.45  
129.40  
129.35  
128.94  
128.65  
128.60  
128.50  
127.72  
127.35  
126.69  
125.47  
123.68  
121.82  
111.19

77.32  
77.00  
76.68

53.77  
52.46

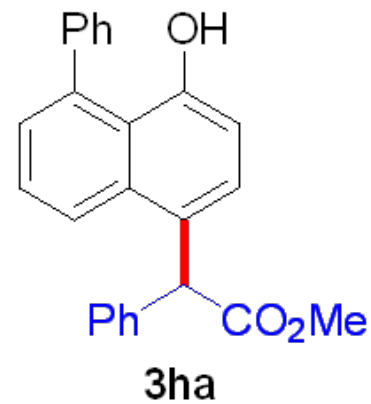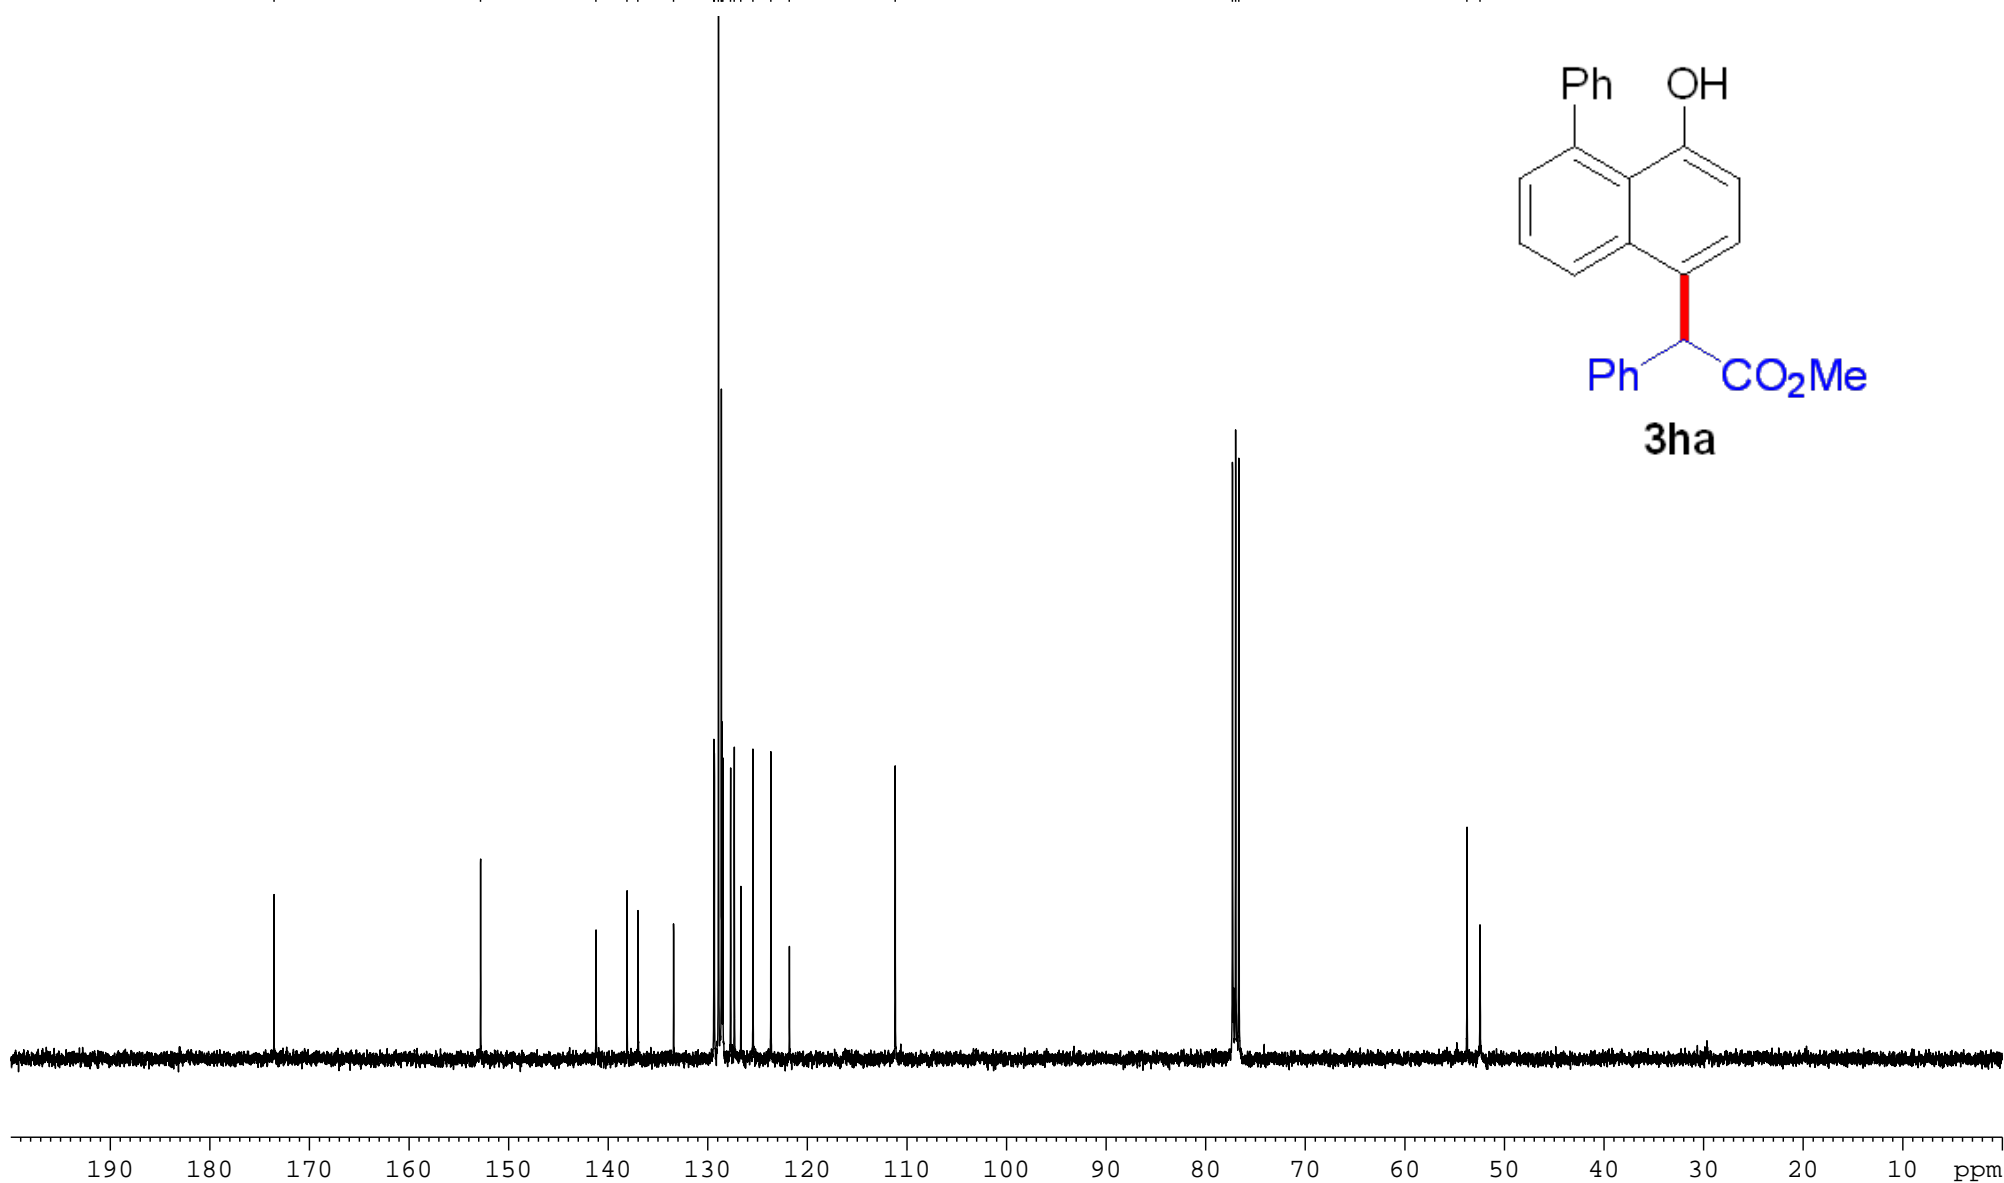



8.482  
8.037  
8.015  
7.875  
7.849  
7.845  
7.835  
7.827  
7.823  
7.378  
7.373  
7.356  
7.354  
7.348  
7.330  
7.310  
7.284  
7.280  
7.275  
7.269  
7.263  
7.256  
7.245  
7.225  
6.960  
6.941  
6.658  
6.618  
5.791

3.765  
3.716

2.990

2.061  
2.055  
2.050  
2.045

yzz-16-021-2

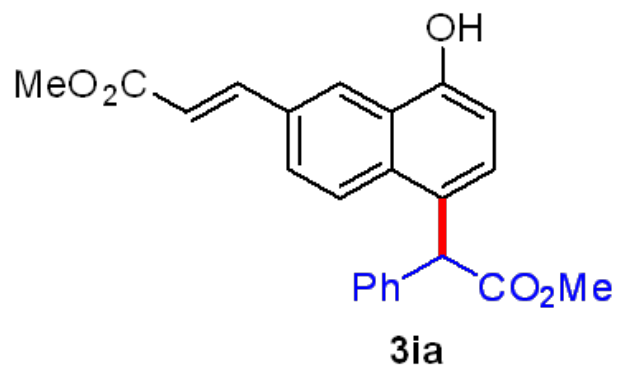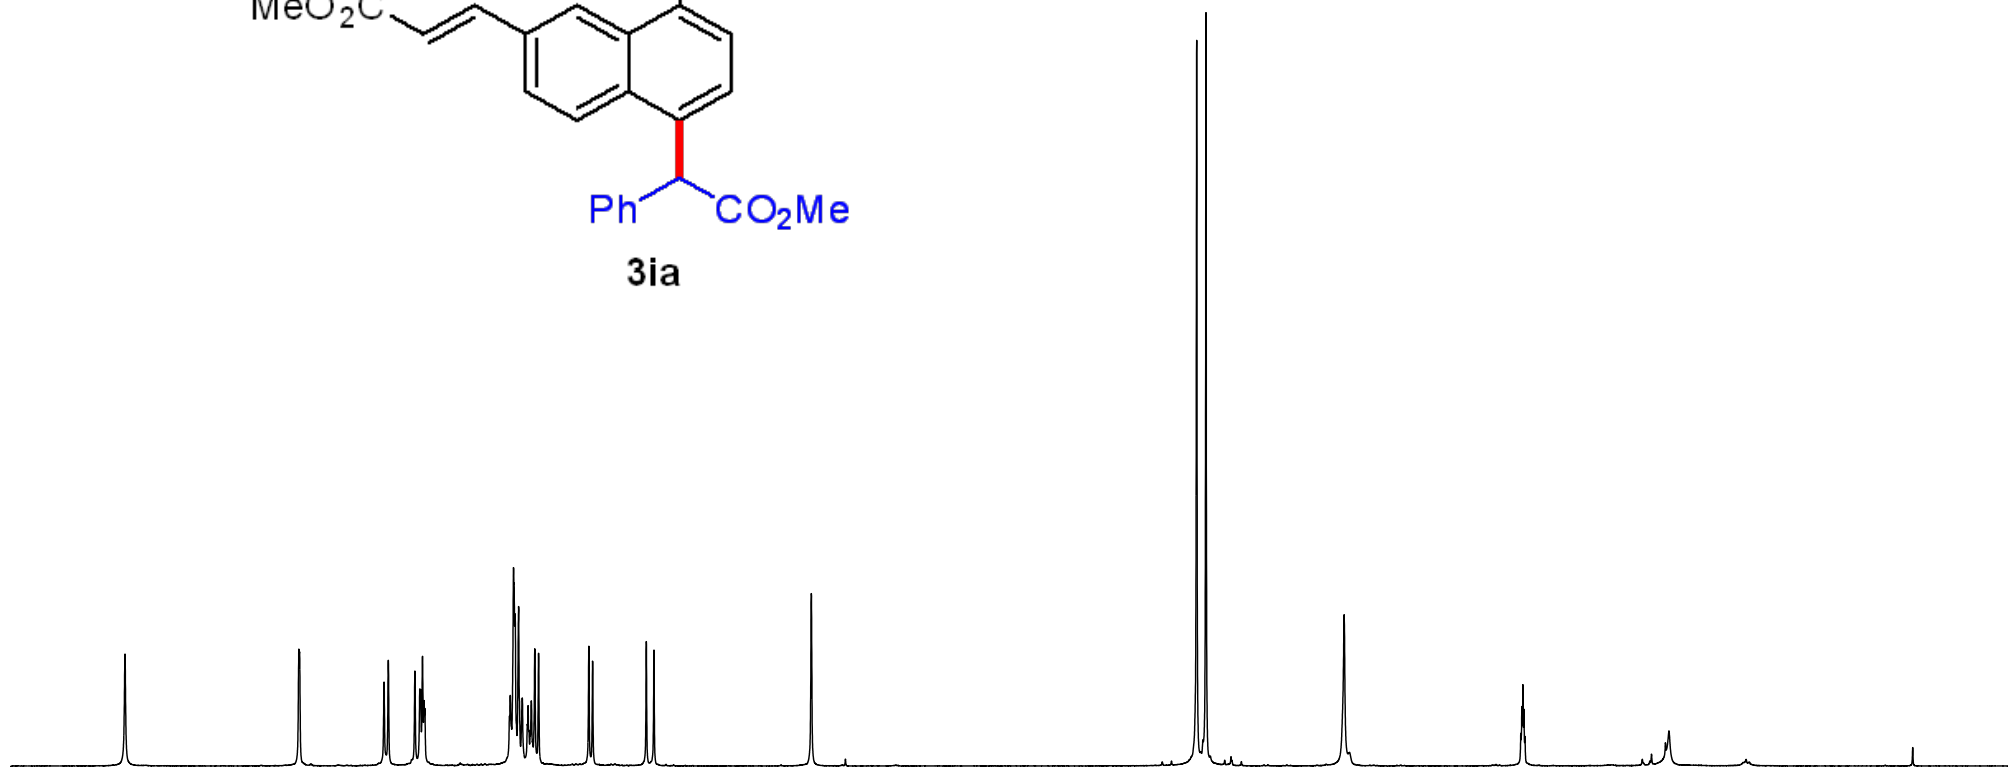

9.5 9.0 8.5 8.0 7.5 7.0 6.5 6.0 5.5 5.0 4.5 4.0 3.5 3.0 2.5 2.0 1.5 1.0 0.5 ppm

0.92 1.02 1.05 2.01 4.06 2.04 1.00 1.03 1.00 3.05 3.05

yzz-16-021-2-c

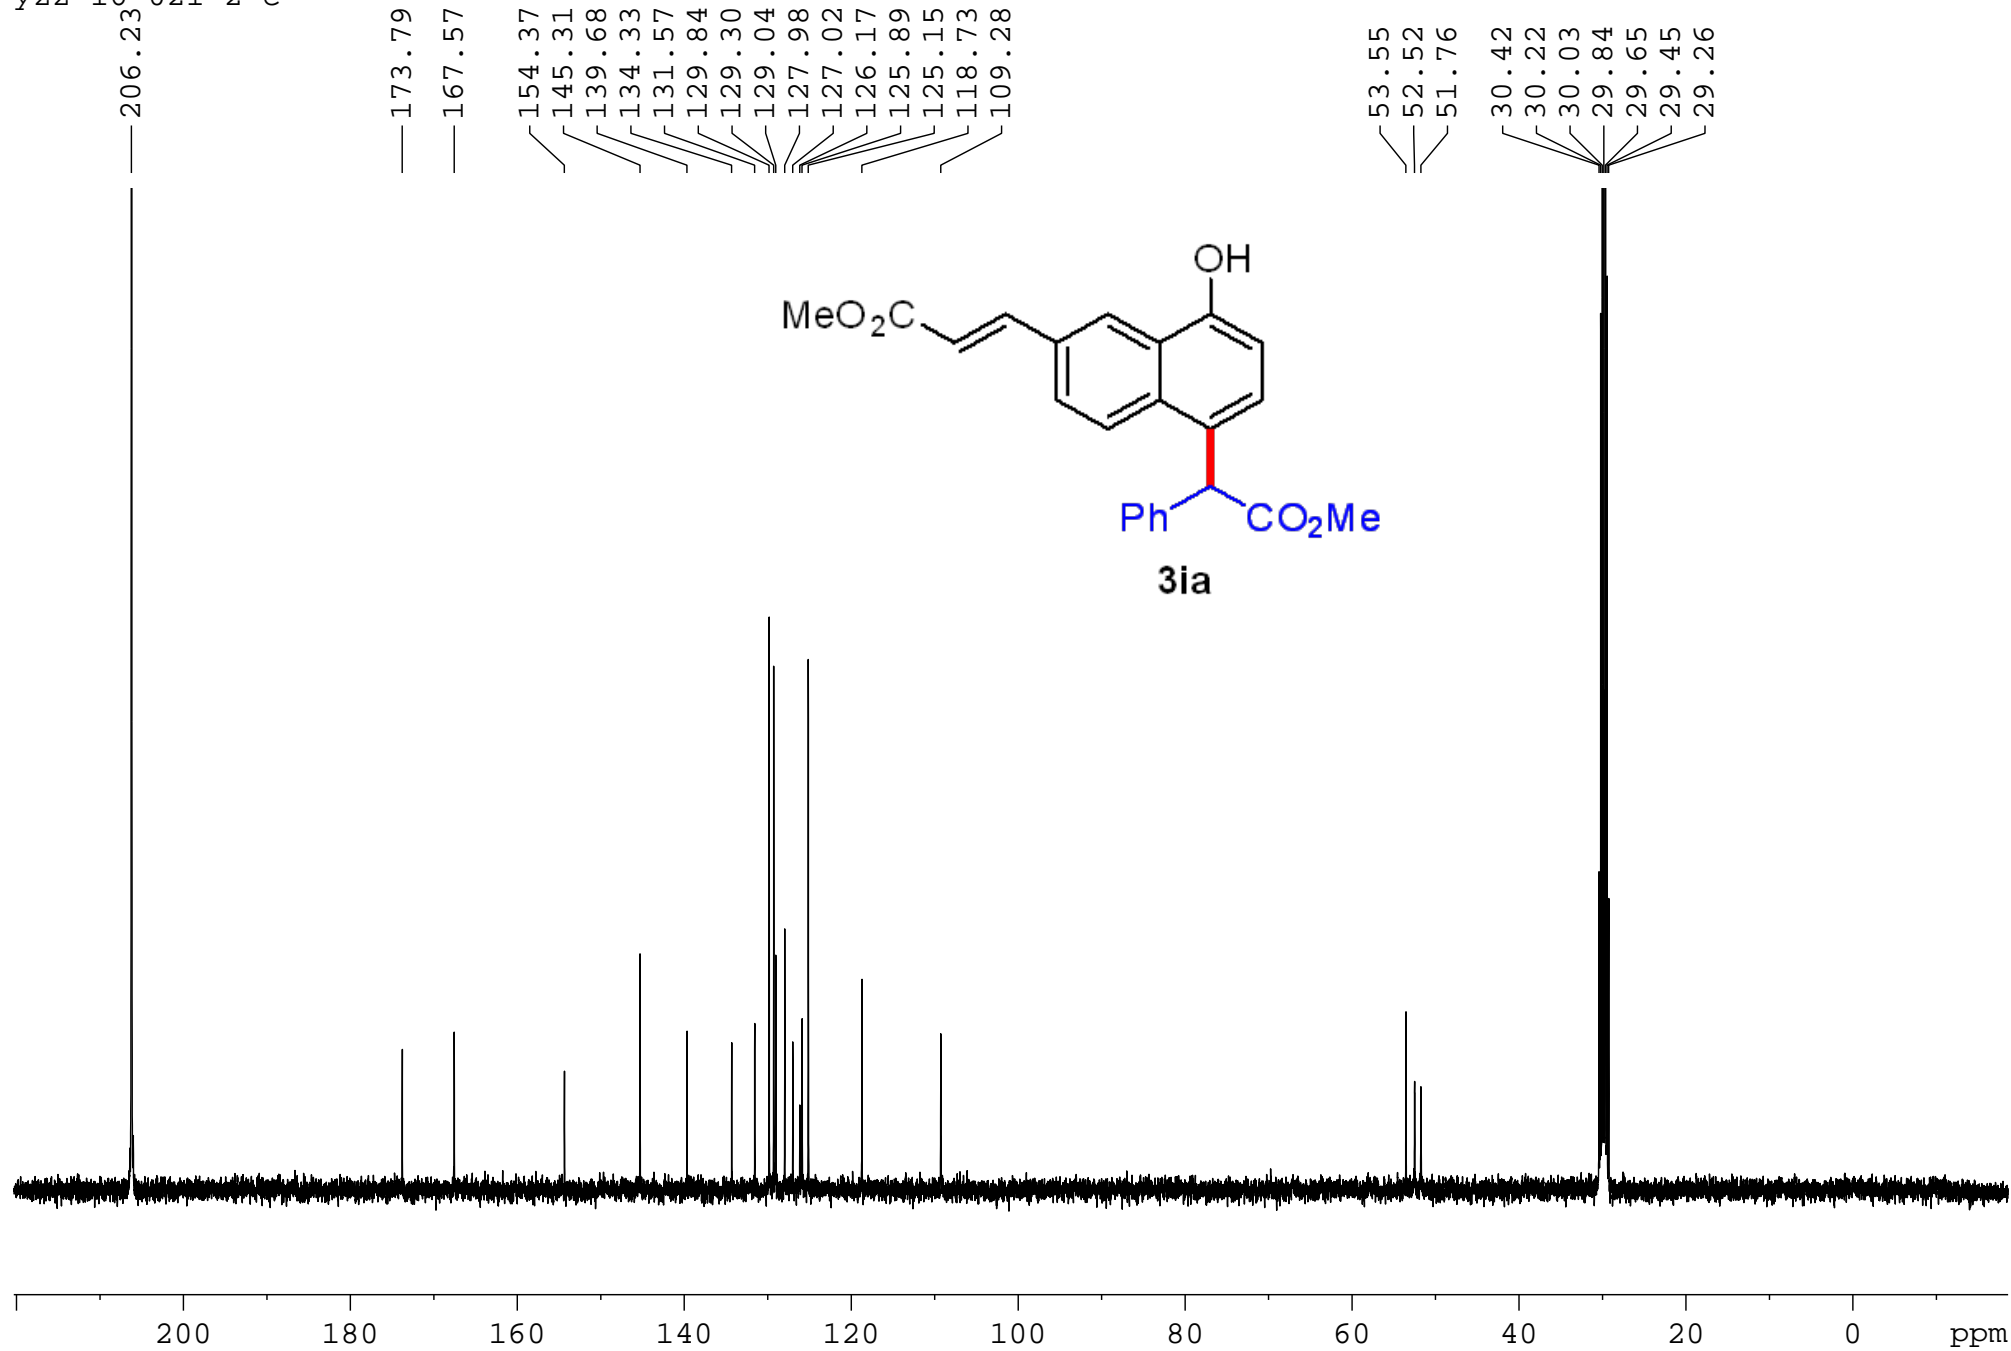

8.307  
8.297  
8.290  
8.283  
7.929  
7.924  
7.906  
7.529  
7.523  
7.511  
7.505  
7.496  
7.486  
7.481  
7.328  
7.316  
7.305  
7.260  
7.236  
7.216  
6.773  
6.760  
6.753  
5.720  
5.704  
5.615  
5.606  
5.601  
4.300  
4.292  
4.285  
4.281  
4.270  
4.266  
4.240  
4.230  
4.075  
4.058  
4.042  
3.845  
3.833  
3.819  
3.807  
3.751  
3.440  
3.422  
3.404  
3.387  
2.238  
2.158  
2.111  
2.082  
1.317  
1.301  
1.273  
1.250  
1.245  
1.235  
1.219

yzz-104

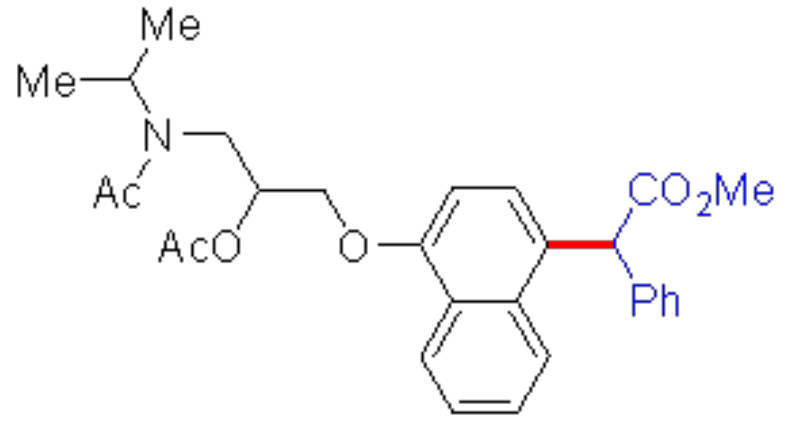

3ja

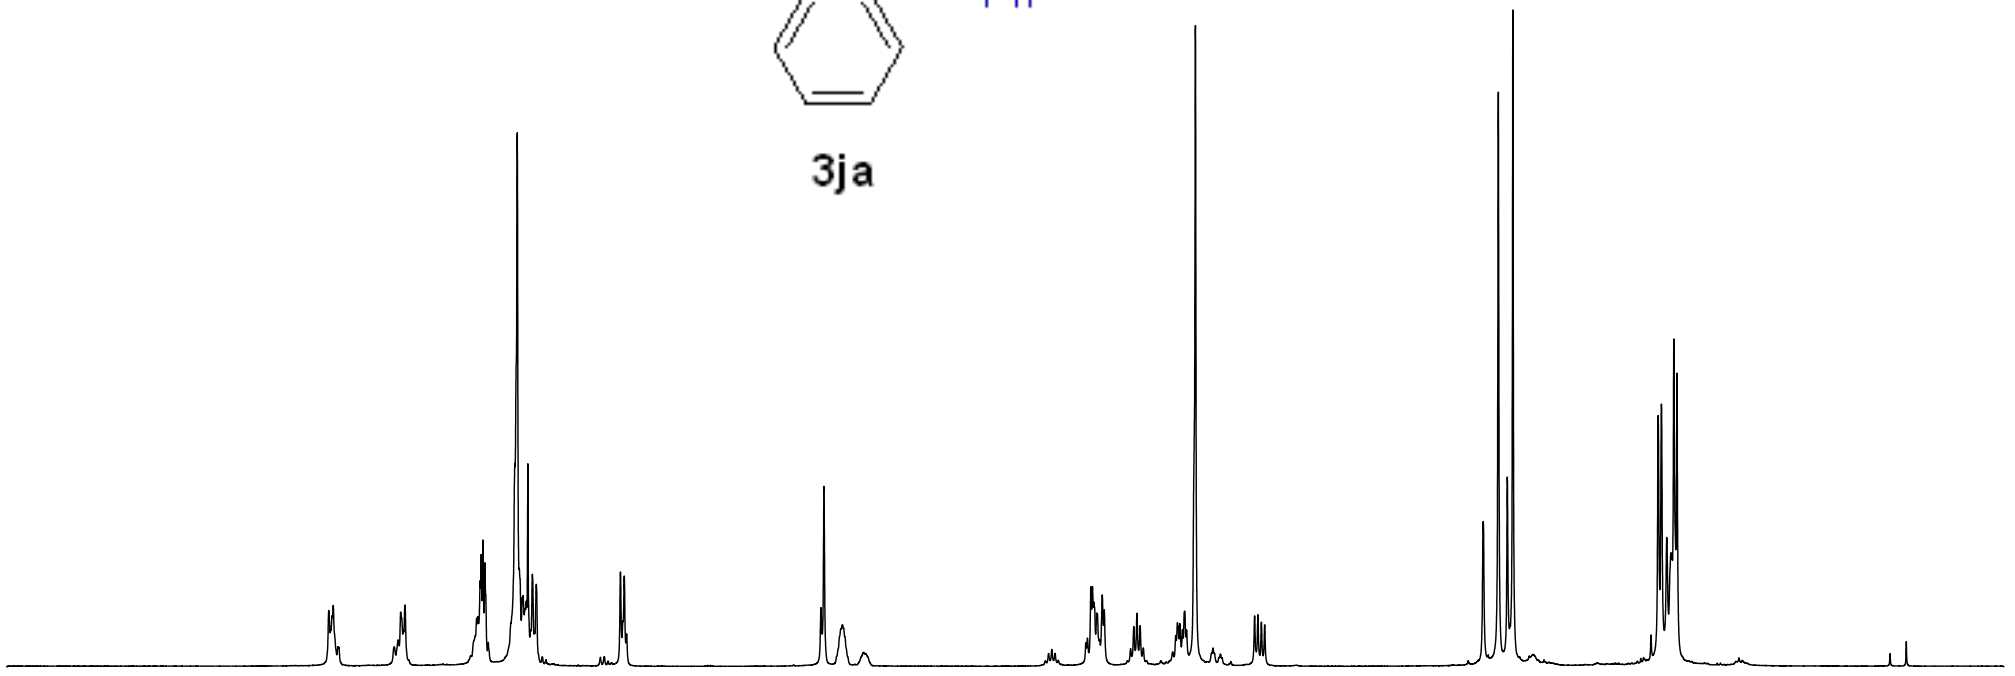

9.5 9.0 8.5 8.0 7.5 7.0 6.5 6.0 5.5 5.0 4.5 4.0 3.5 3.0 2.5 2.0 1.5 1.0 0.5 ppm

1.03  
1.06  
2.03  
5.00  
1.05  
1.00  
0.27  
0.73  
0.74  
0.28  
0.27  
2.04  
0.74  
1.05  
3.00  
0.31  
0.74  
0.81  
2.23  
0.82  
2.24  
2.27  
1.68  
2.28

yyy-15-054-2-c

173.34  
173.24  
171.21  
170.38  
170.05  
153.88  
153.33  
138.06  
132.47  
132.38  
128.79  
128.54  
128.49  
127.27  
127.18  
126.93  
126.83  
126.33  
126.20  
125.93  
125.74  
125.36  
125.07  
123.07  
122.90  
122.58  
122.17  
104.17  
77.32  
77.00  
76.68  
71.44  
70.79  
68.33  
66.91  
53.10  
52.27  
49.40  
47.21  
45.42  
41.33  
22.63  
21.95  
21.61  
21.00  
20.86  
20.51  
20.09

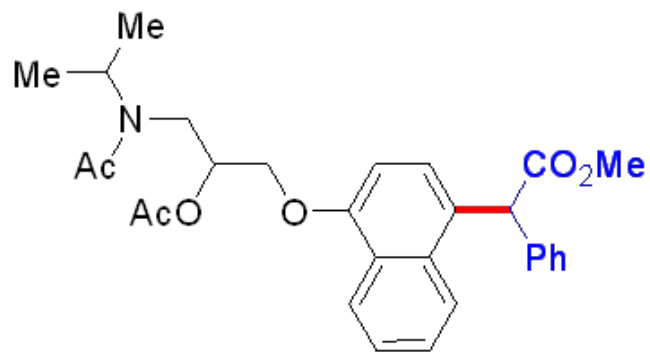

3ja

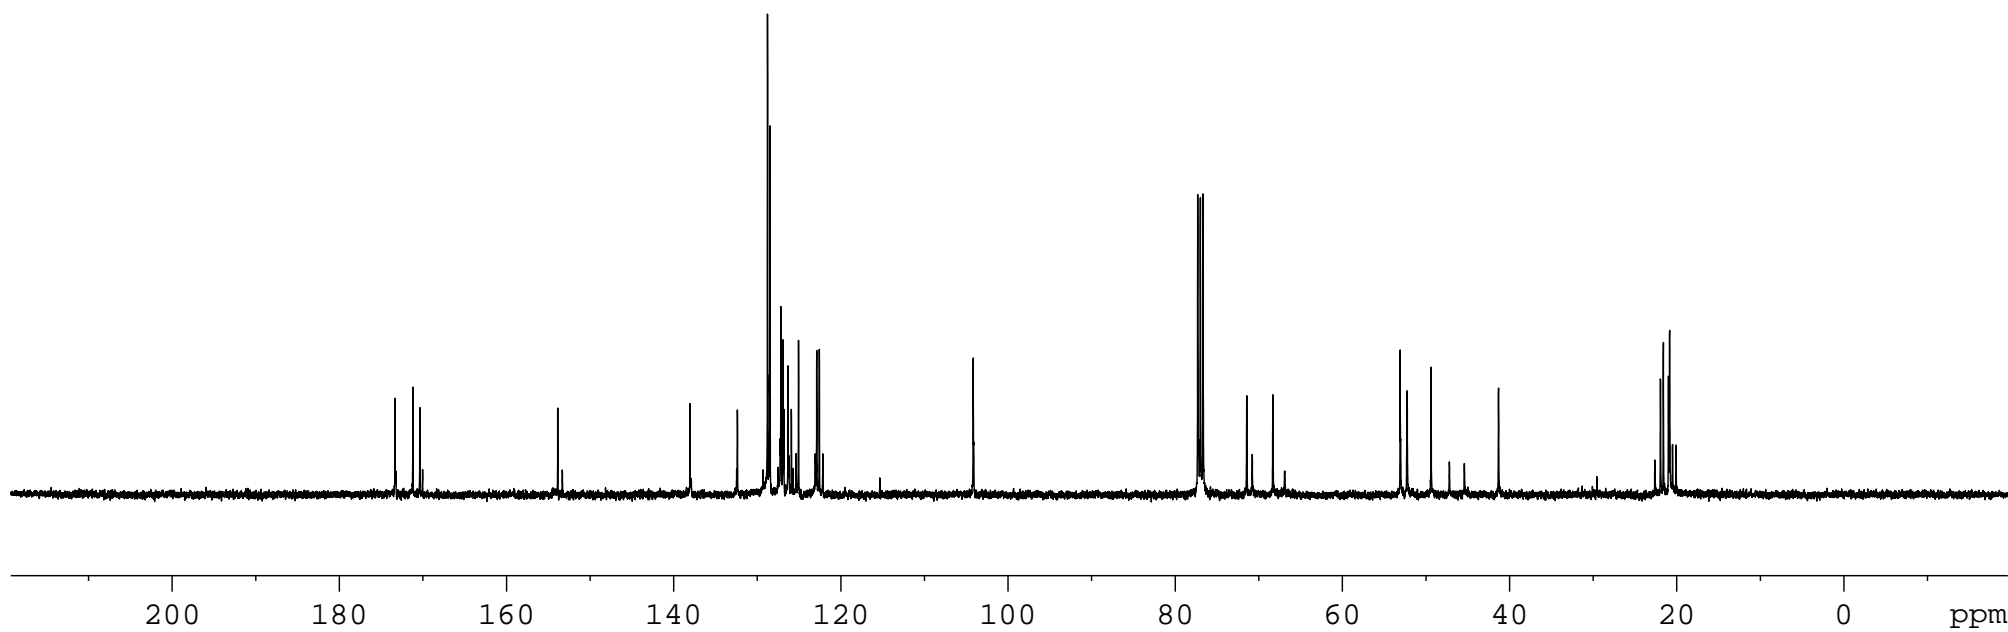

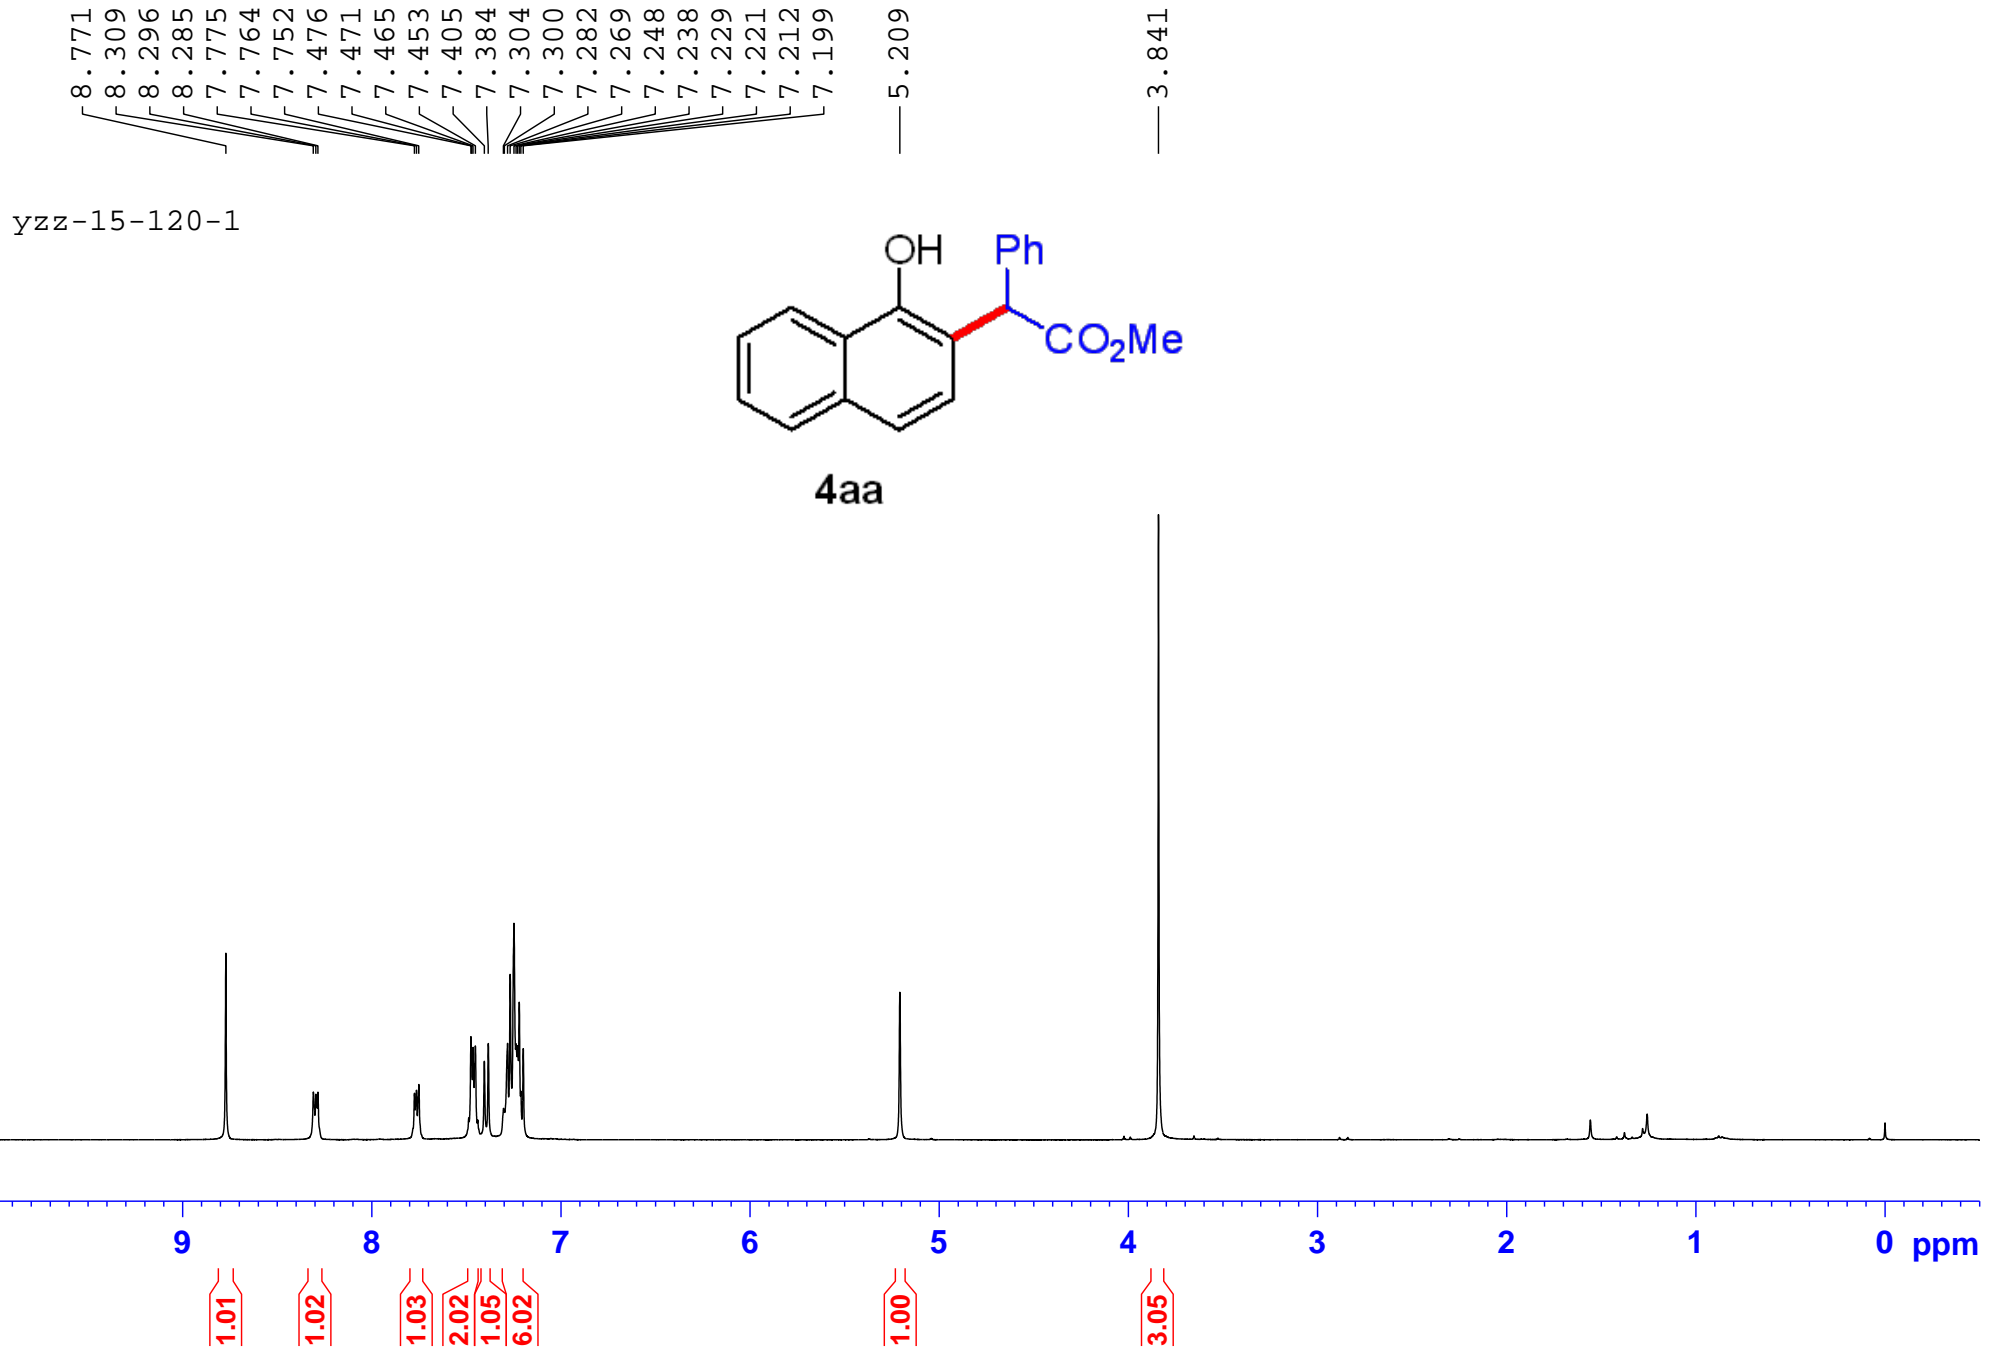

yzz-15-120-1-c

— 176.55

151.35  
136.62  
134.42  
129.03  
128.74  
127.52  
127.23  
126.61  
126.32  
125.39  
122.55  
120.28  
116.04

77.32  
77.00  
76.68

55.86  
53.26

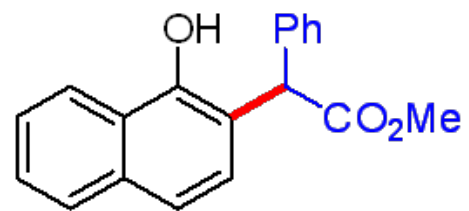

4aa

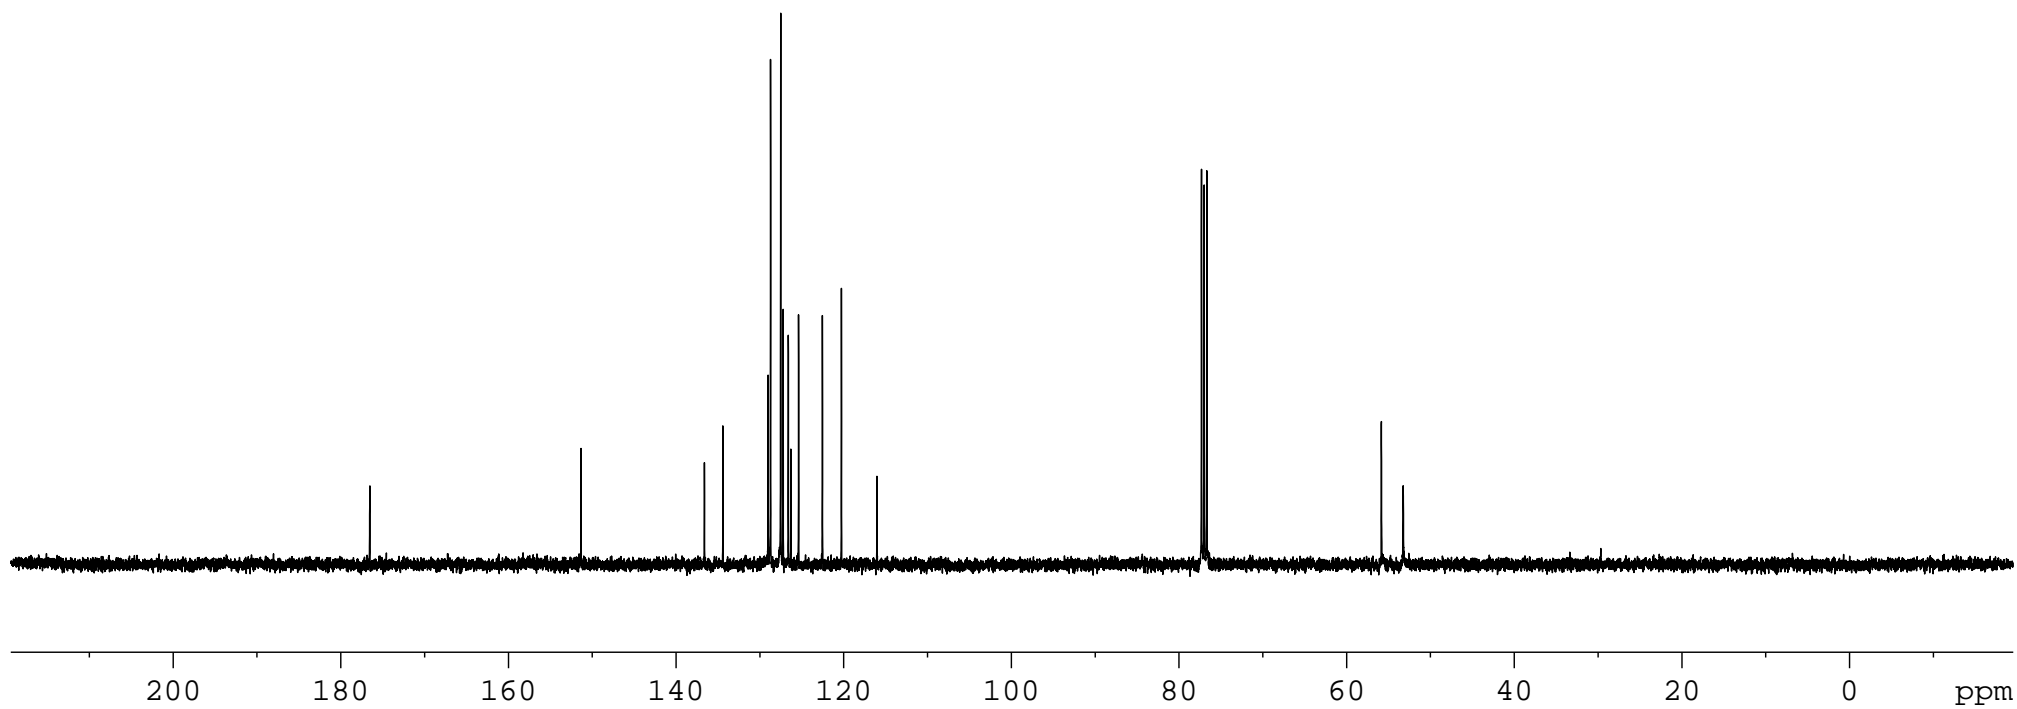

9.040  
8.330  
8.316  
8.306  
7.774  
7.768  
7.764  
7.475  
7.471  
7.463  
7.456  
7.452  
7.451  
7.403  
7.382  
7.282  
7.266  
7.251  
7.232  
7.227  
7.213  
7.206

5.170  
4.369  
4.351  
4.342  
4.324  
4.295  
4.277  
4.268  
4.250

1.346  
1.328  
1.310

yzz-15-121-1

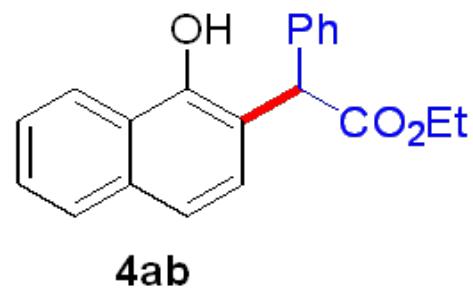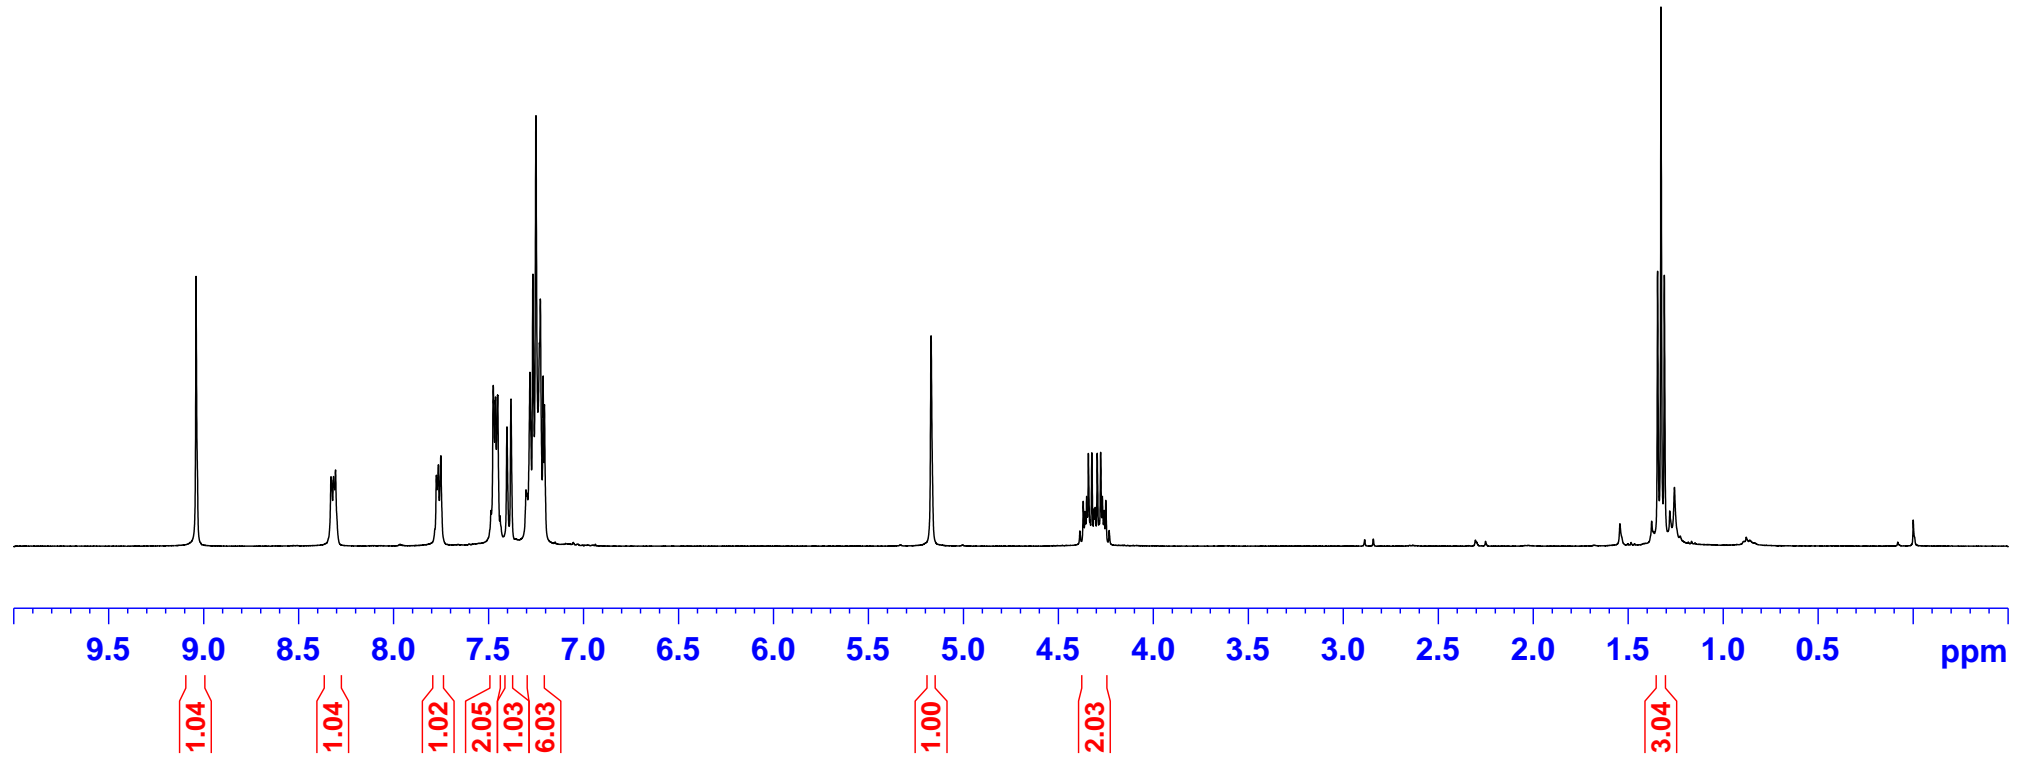

yzz-15-121-1-c

— 176.25

151.55  
136.75  
134.44  
129.20  
128.71  
127.47  
127.44  
127.18  
126.59  
126.41  
125.33  
122.69  
120.16  
115.96

77.32  
77.00  
76.68

— 62.59

— 56.29

— 14.04

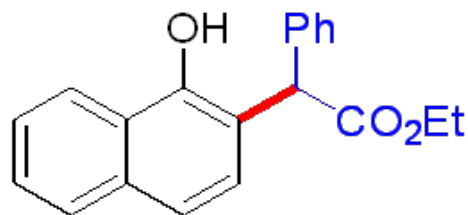

4ab

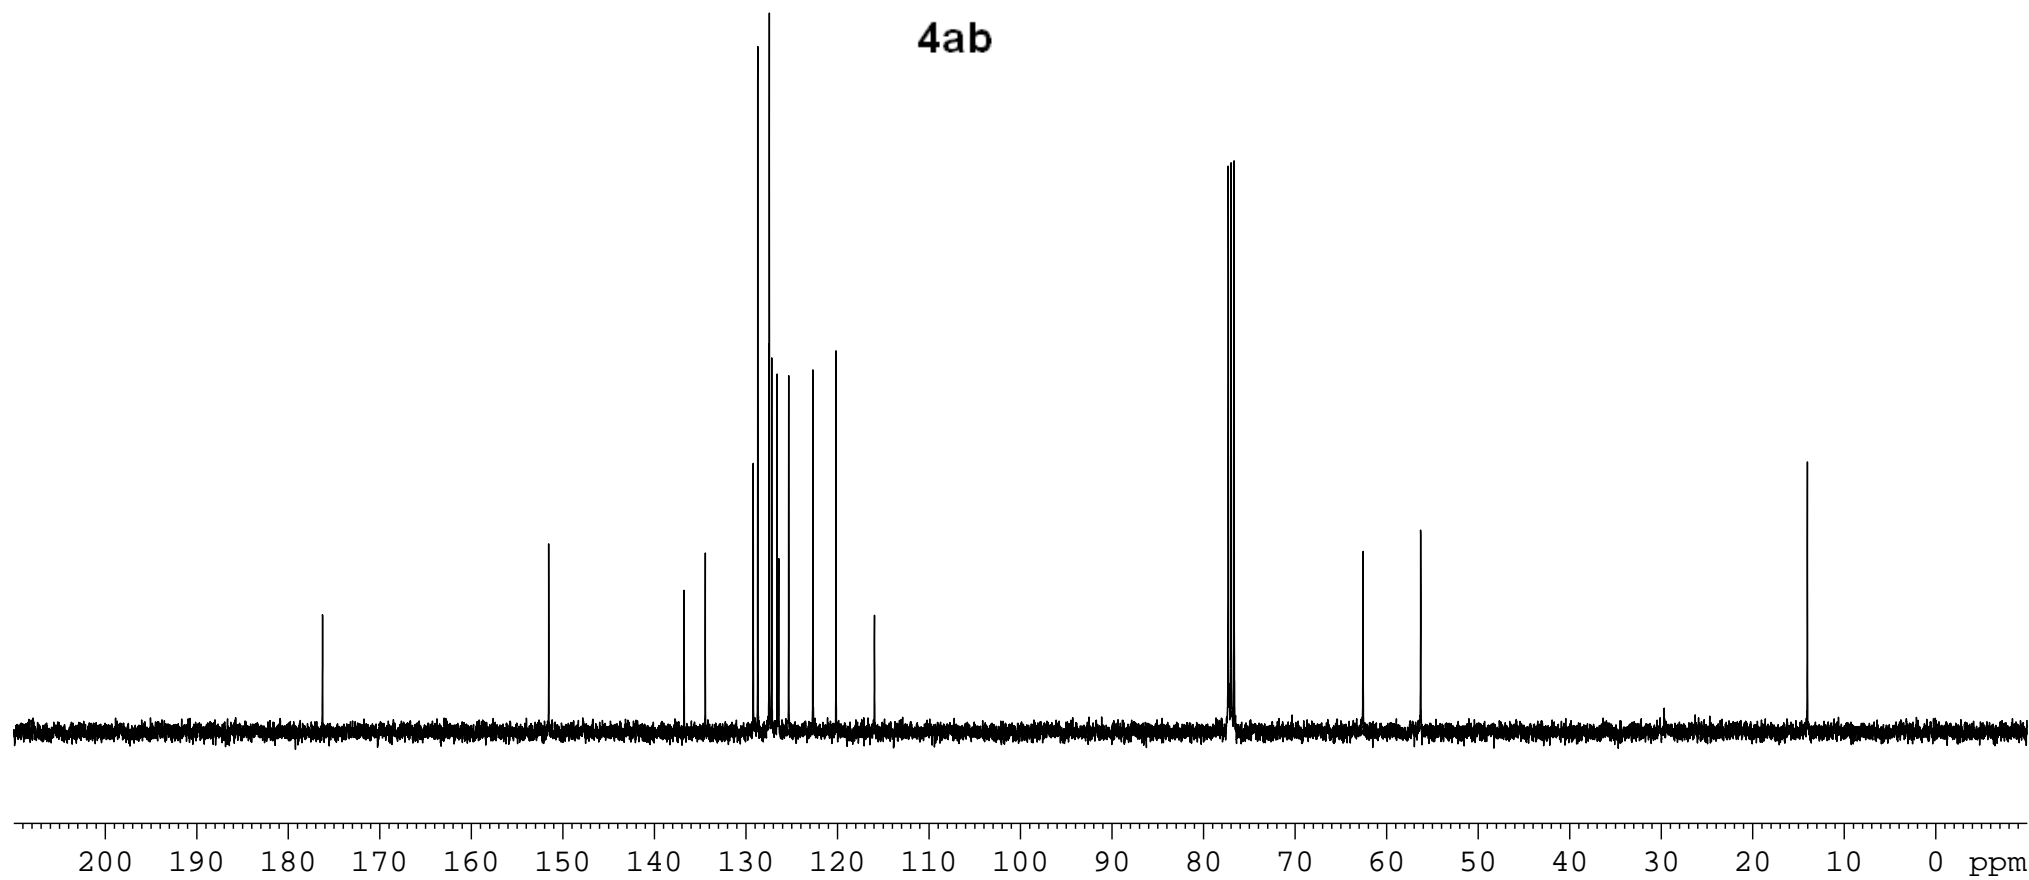



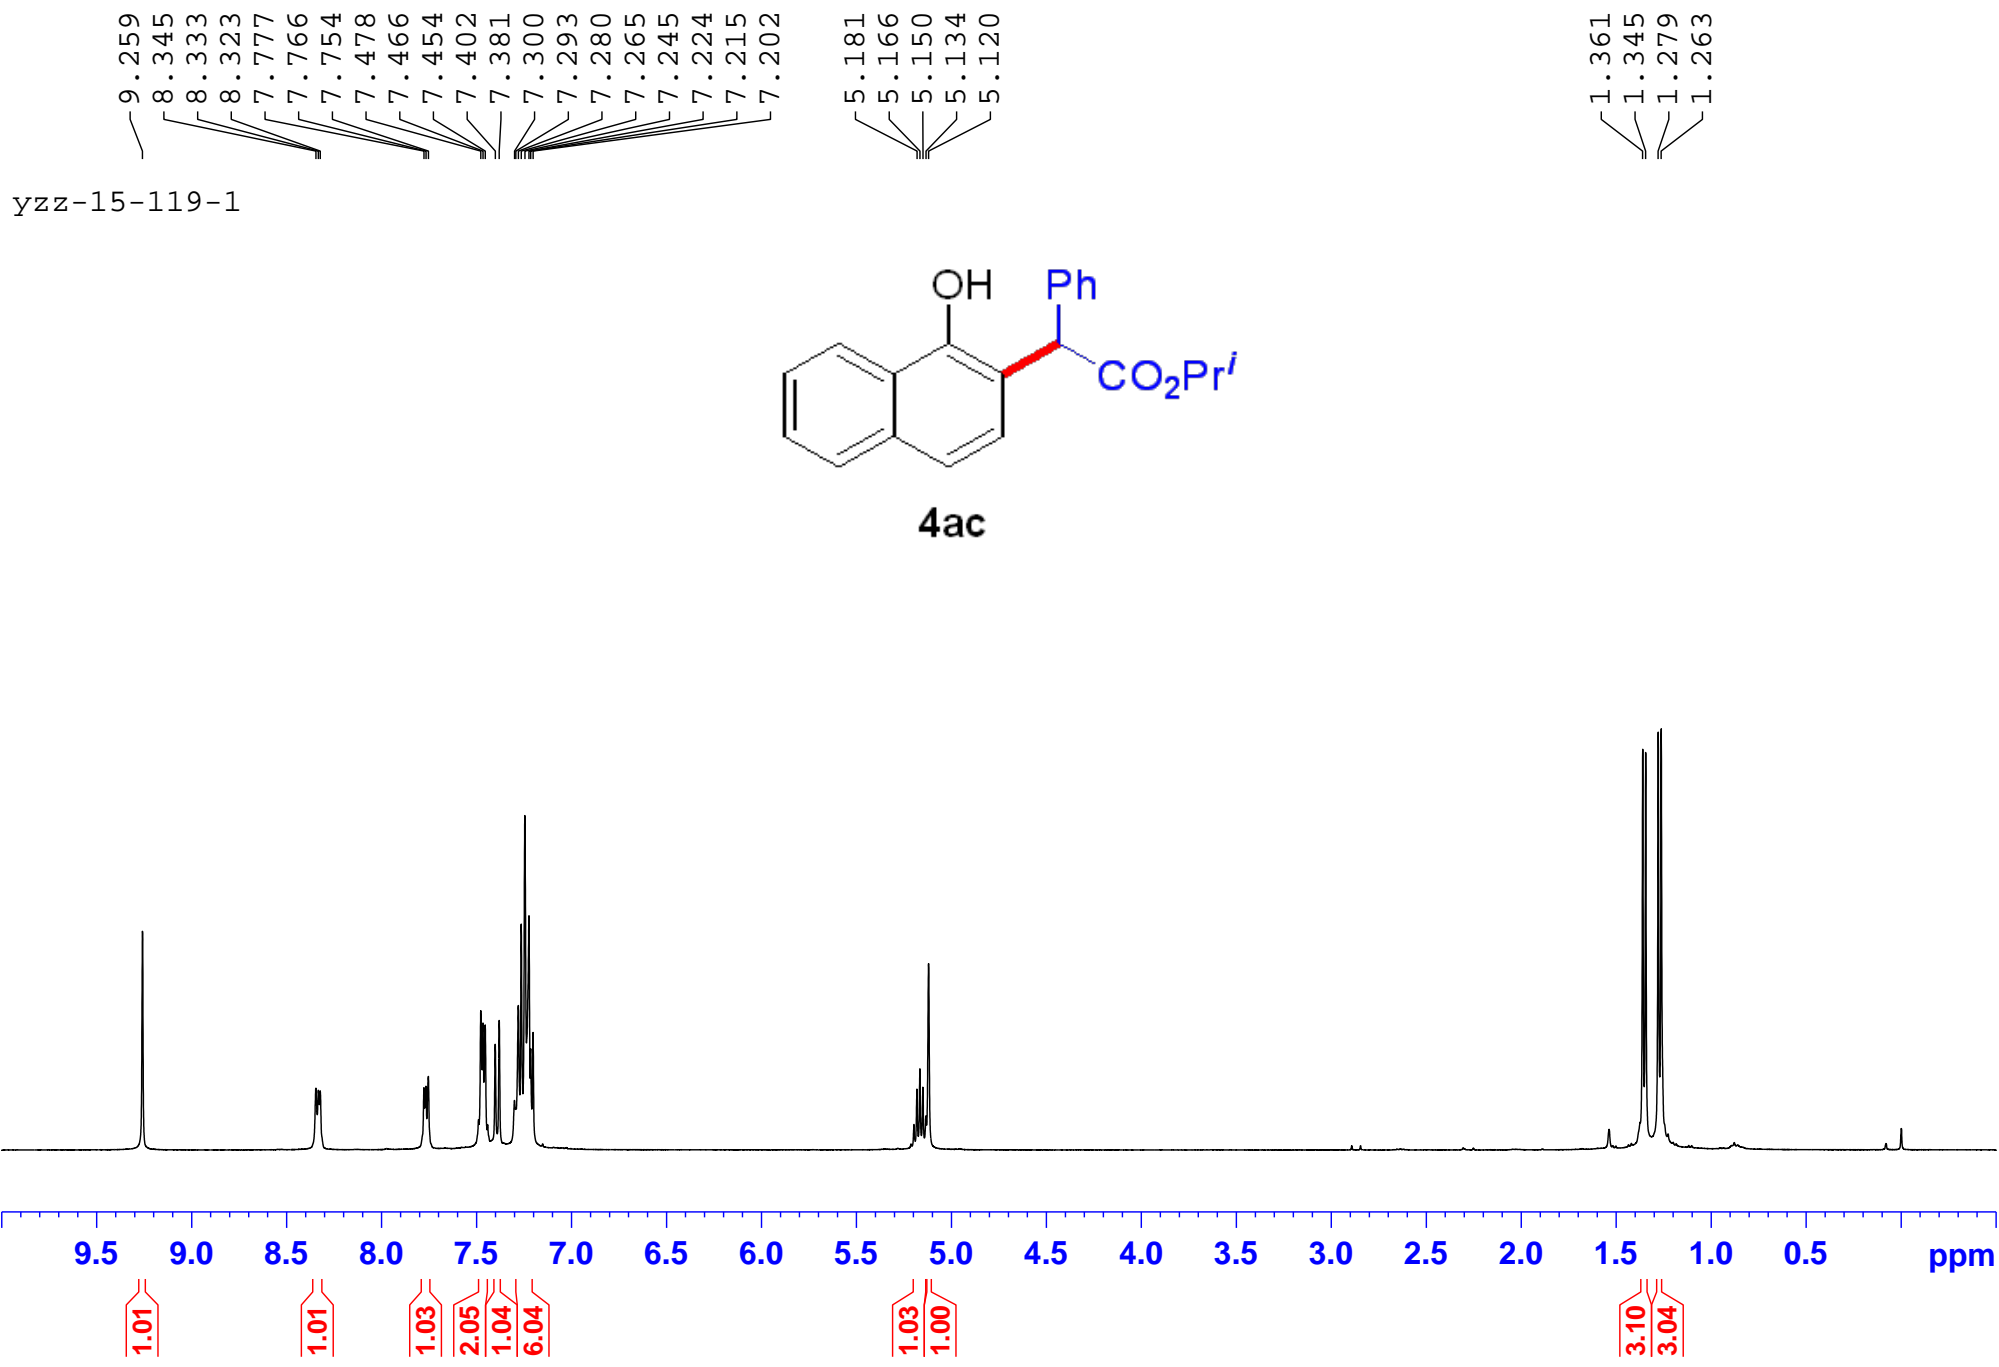

yzz-15-119-1-c

— 175.88

151.69  
136.87  
134.45  
129.34  
128.69  
127.42  
127.36  
127.15  
126.57  
126.48  
125.28  
122.78  
120.07  
115.89

77.32  
77.00  
76.68  
70.60

— 56.68

21.69  
21.59

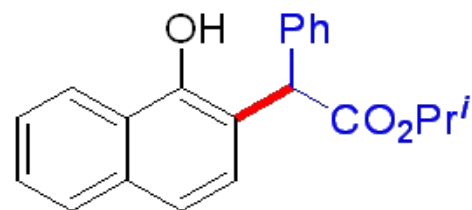

4ac

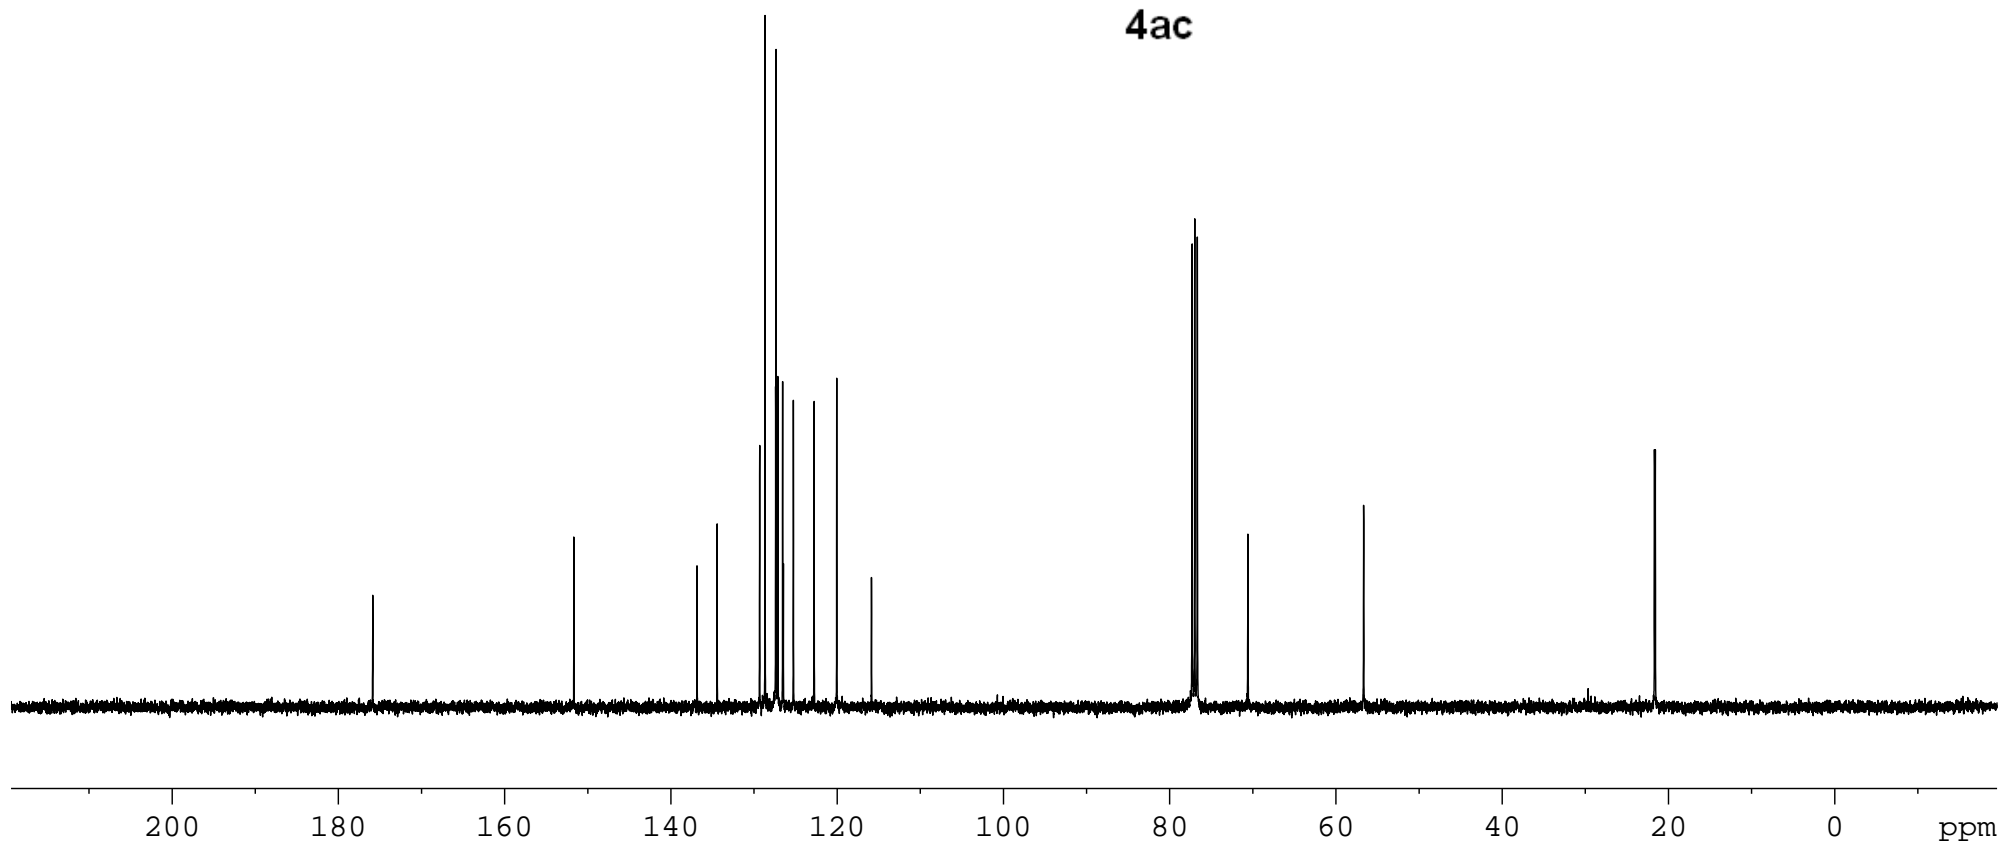

9.433  
9.428  
8.353  
8.347  
8.341  
8.335  
7.768  
7.763  
7.755  
7.751  
7.471  
7.467  
7.462  
7.456  
7.452  
7.449  
7.396  
7.375  
7.278  
7.274  
7.261  
7.245  
7.223  
7.205  
7.198

5.053

1.519

YZZ-15-122-1

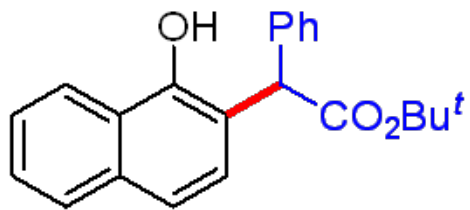

4ad

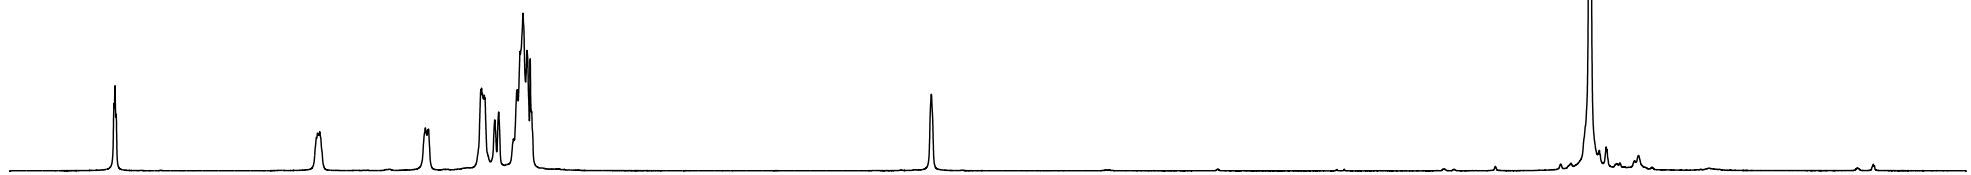

9 8 7 6 5 4 3 2 1 ppm

1.03

1.04

1.01

2.06

1.03

6.09

1.00

9.01

YZZ-15-122-1-C

— 175.85

— 151.78  
— 137.17  
— 134.41  
— 129.48  
— 128.63  
— 127.30  
— 127.11  
— 126.51  
— 125.20  
— 122.84  
— 119.92  
— 116.12

— 83.94  
— 77.32  
— 77.00  
— 76.68

— 57.61

— 27.94

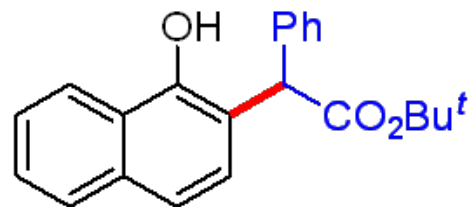

4ad

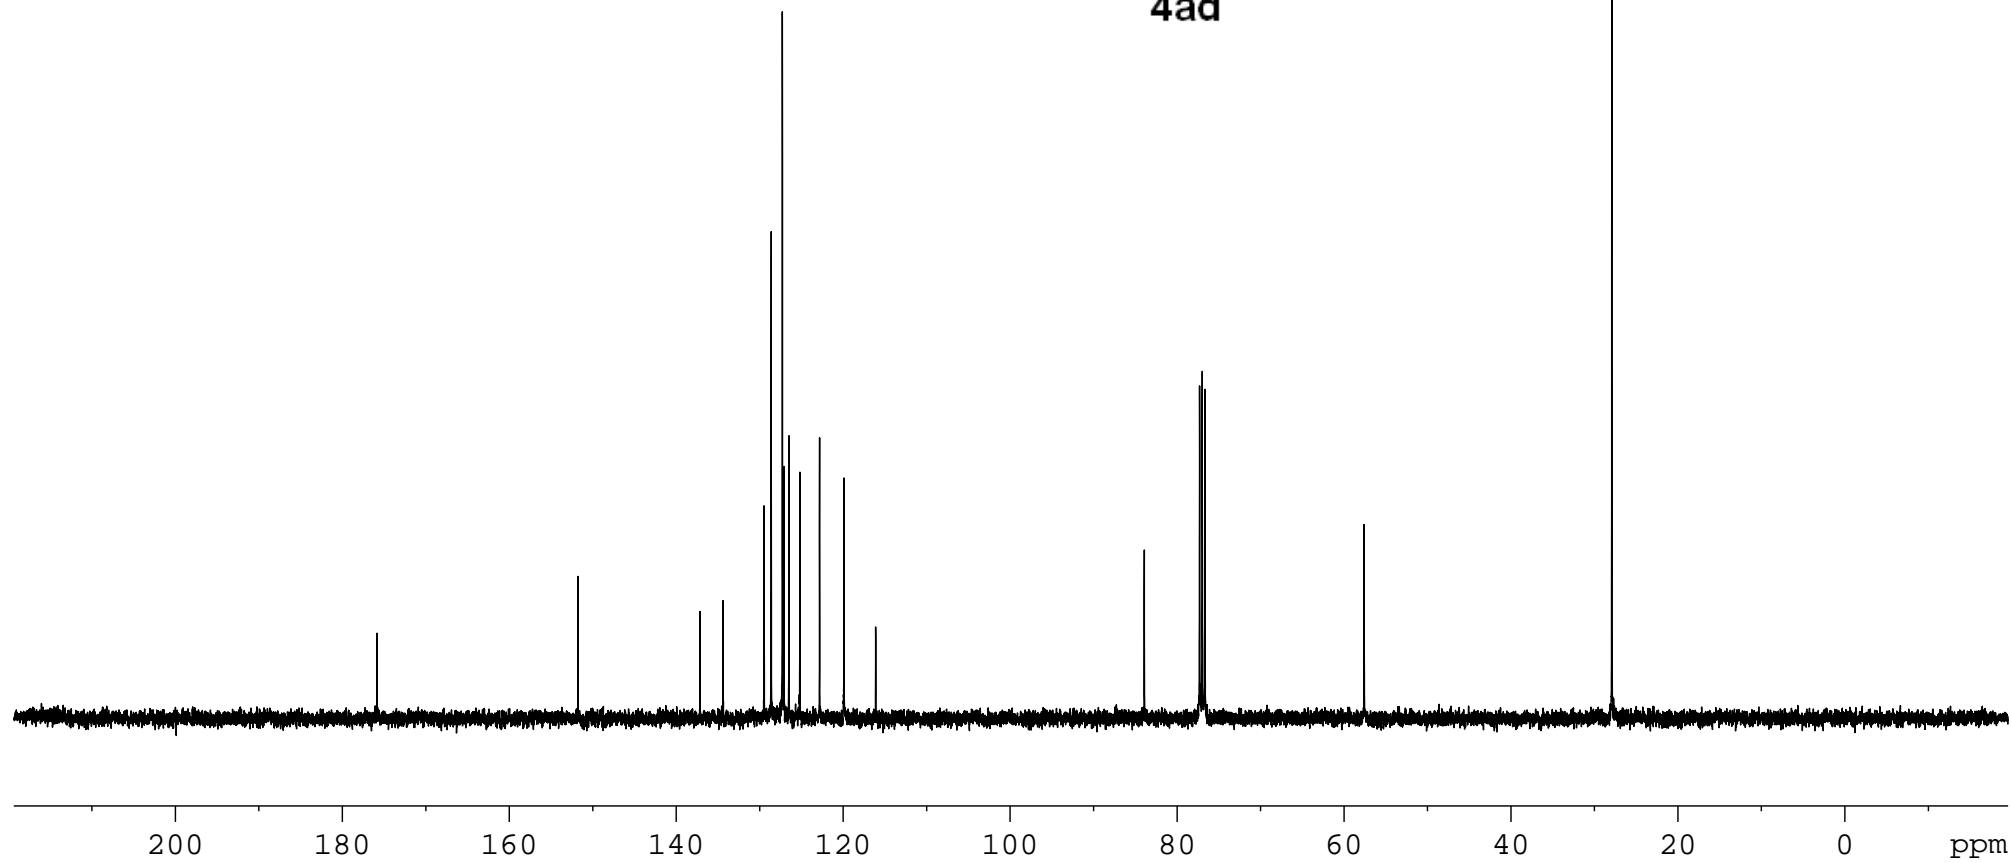

9.177  
8.379  
8.366  
8.355  
7.828  
7.821  
7.817  
7.805  
7.546  
7.534  
7.530  
7.523  
7.514  
7.511  
7.498  
7.456  
7.435  
7.306  
7.284  
7.260  
7.249  
7.228  
7.206  
5.221  
5.205  
5.190  
5.127

1.402  
1.387  
1.320  
1.304

yzz-15-125-1

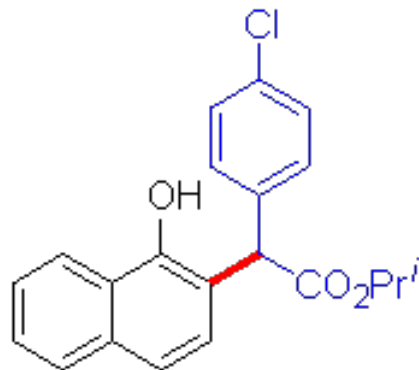

4ae

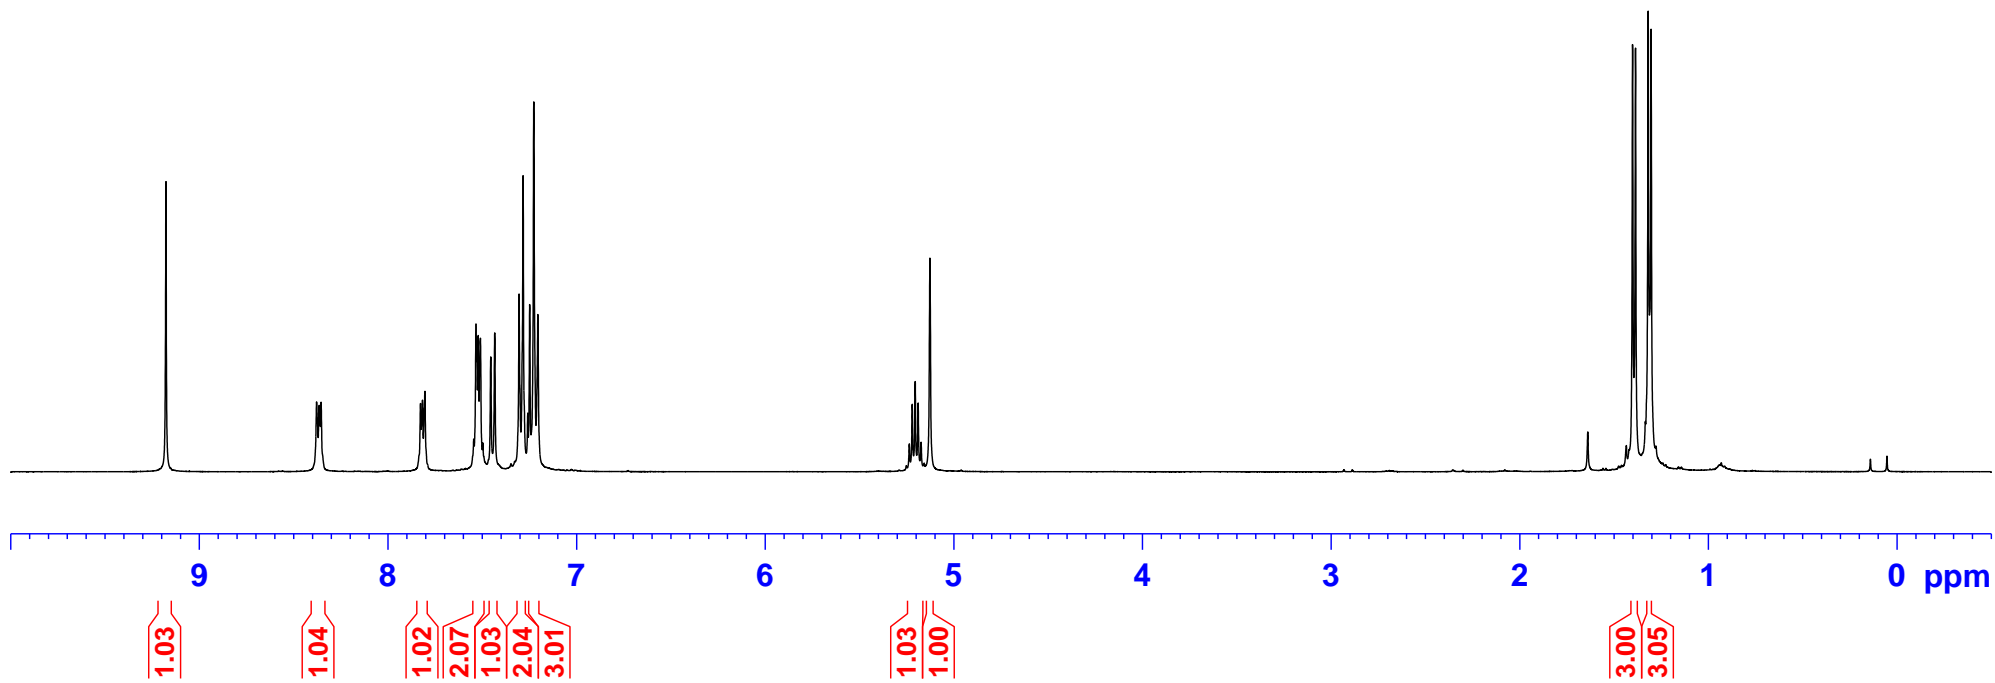

yzz-15-125-1-c

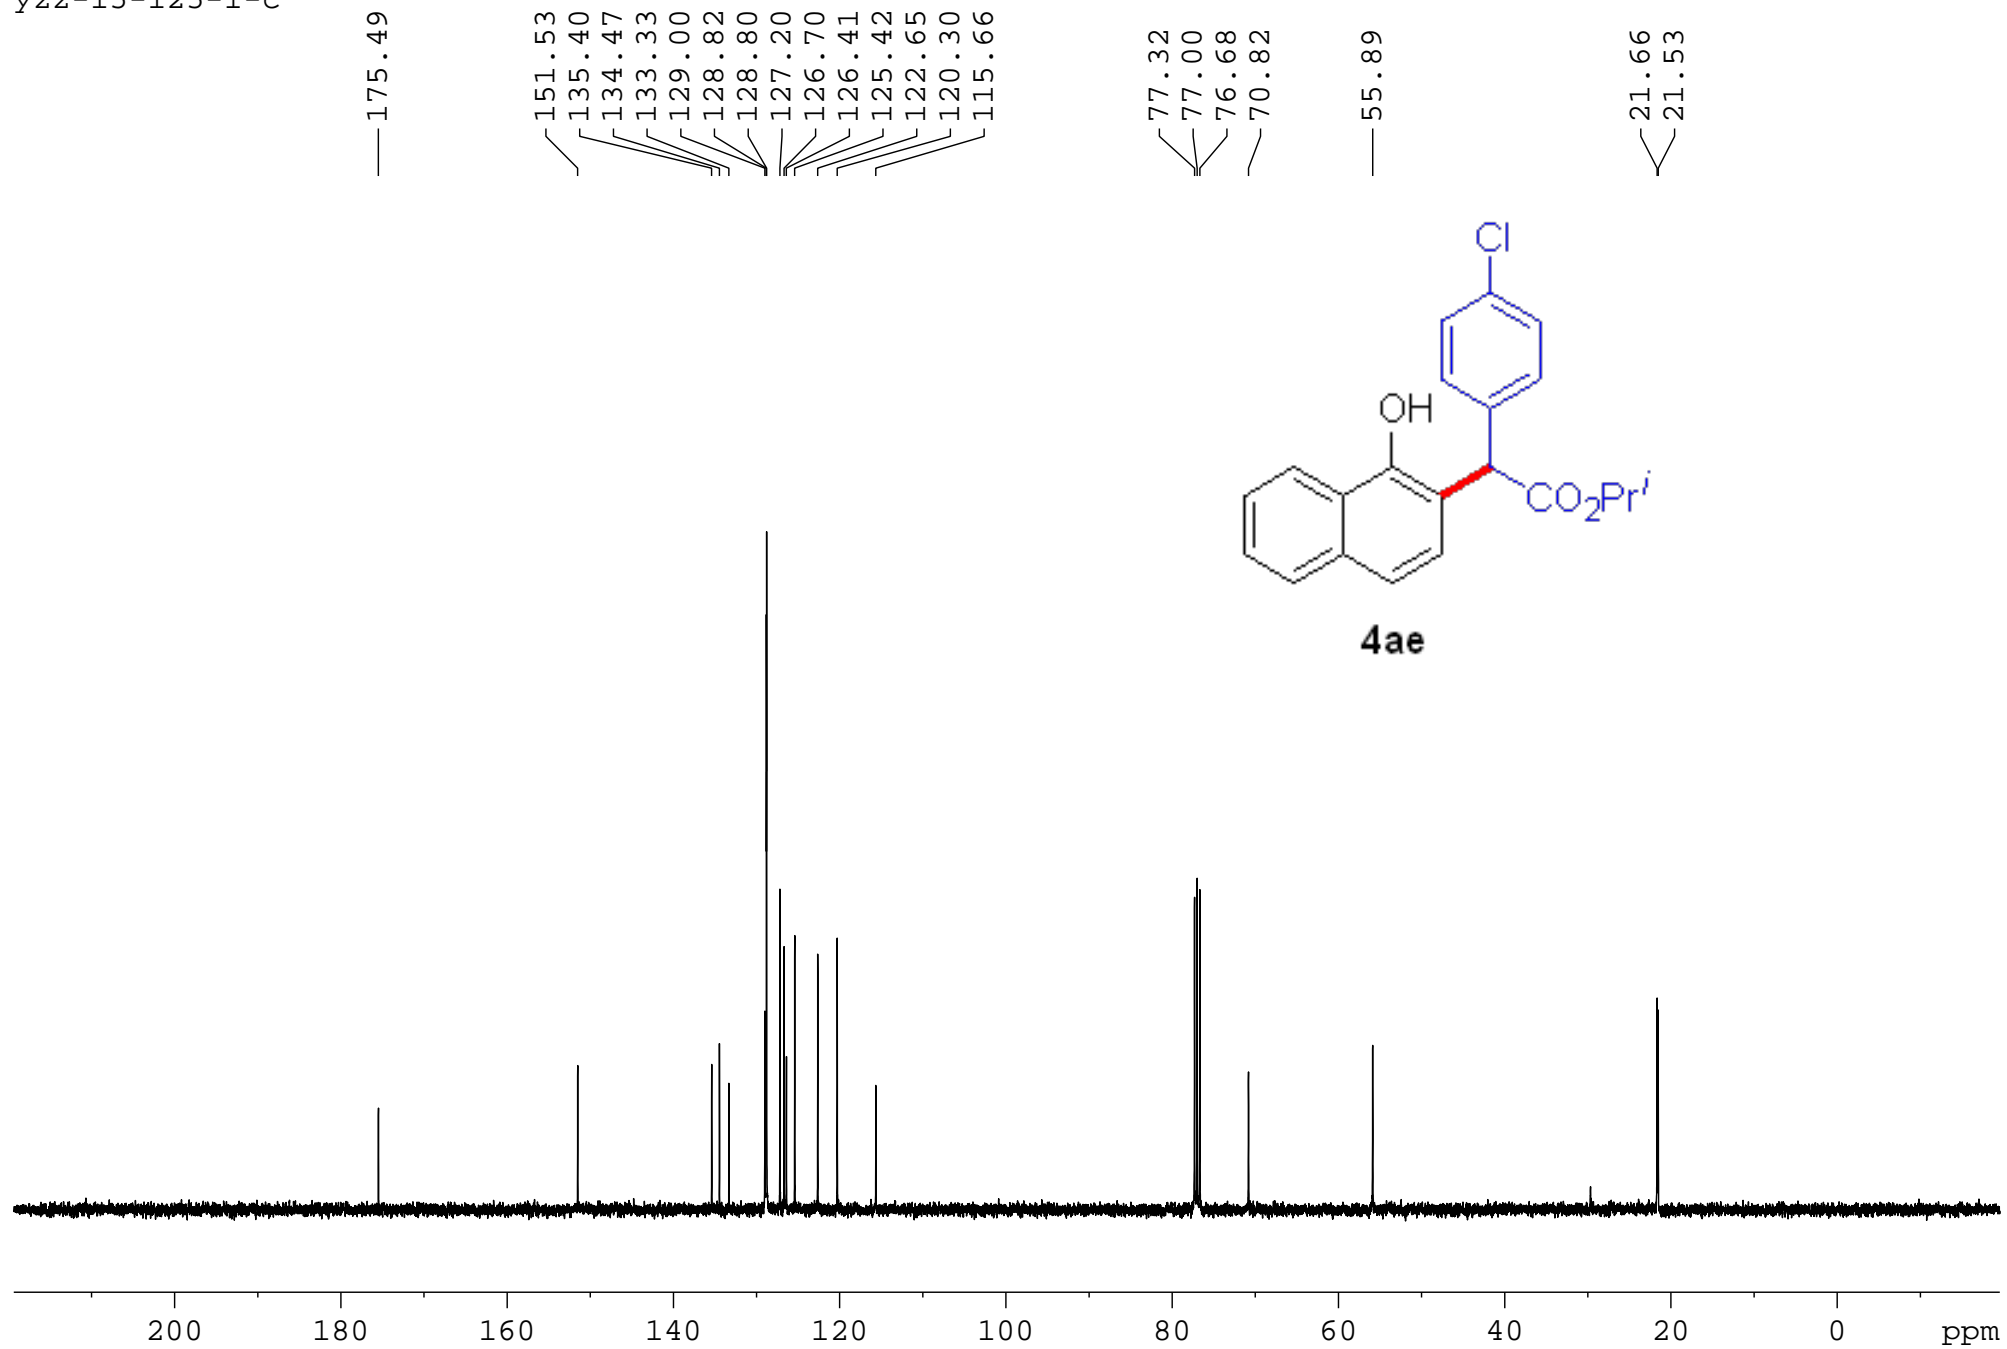

9.153  
8.366  
8.352  
8.342  
7.828  
7.820  
7.814  
7.810  
7.797  
7.545  
7.540  
7.527  
7.523  
7.516  
7.507  
7.504  
7.491  
7.485  
7.449  
7.427  
7.260  
7.238  
7.217  
7.159  
7.138  
5.228  
5.212  
5.197  
5.181  
5.165  
5.095

1.395  
1.379  
1.312  
1.297

yyy-15-124-1

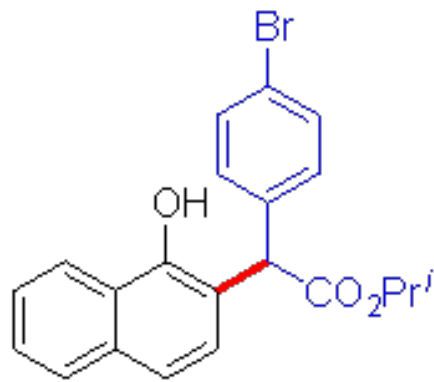

4af

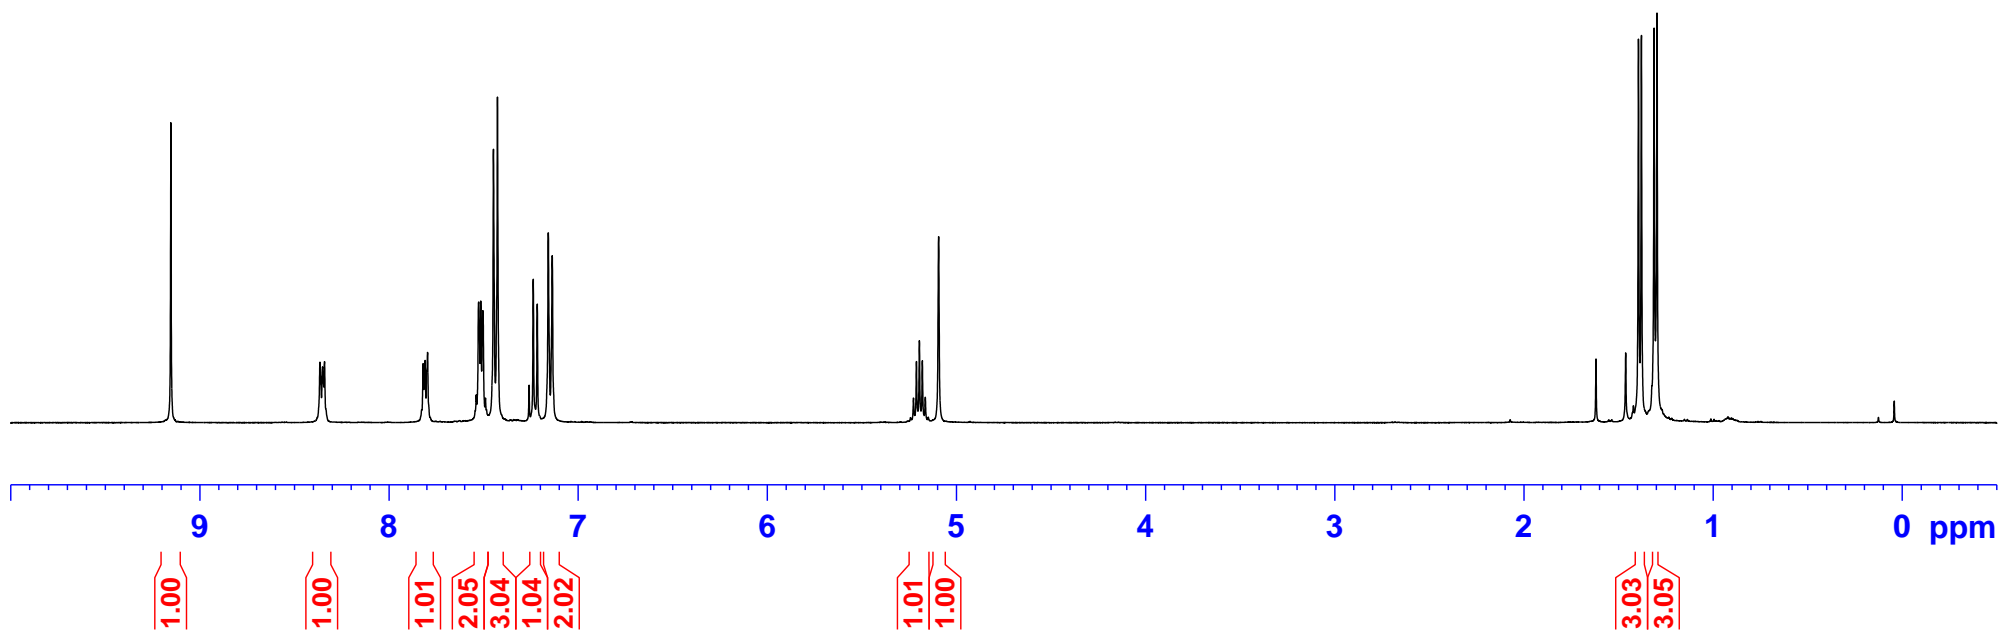

yzz-15-124-1-c

— 175.42

151.53  
135.94  
134.48  
131.76  
129.17  
129.00  
127.20  
126.72  
126.41  
125.43  
122.65  
121.48  
120.31  
115.58

77.32  
77.00  
76.68  
70.85

— 55.96

21.67  
21.54

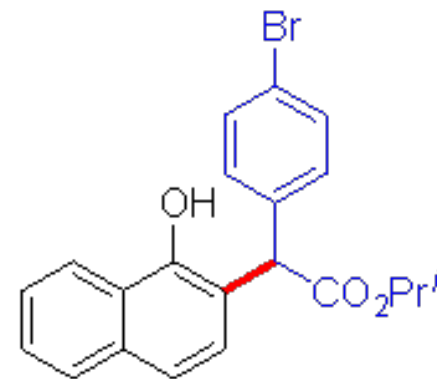

4af

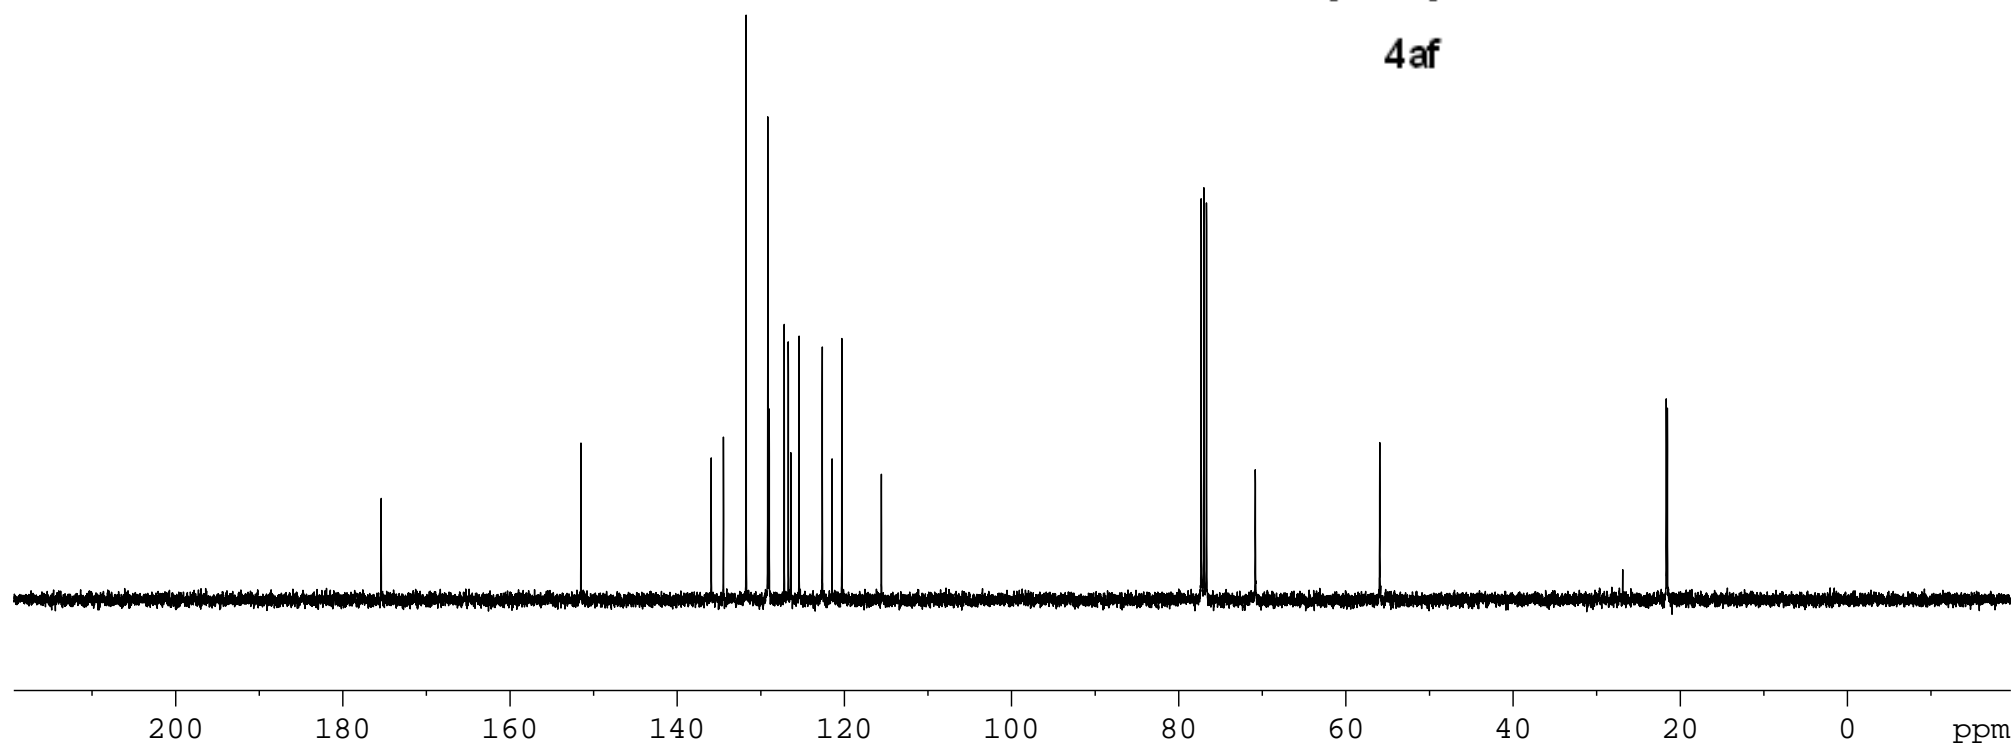



9.253  
8.345  
8.339  
8.333  
8.327  
8.322  
7.766  
7.760  
7.756  
7.751  
7.744  
7.466  
7.462  
7.457  
7.454  
7.447  
7.443  
7.389  
7.368  
7.213  
7.196  
7.192  
7.133  
7.112  
7.090  
7.070  
5.184  
5.168  
5.152  
5.137  
5.121  
5.079

— 2.279

1.350  
1.335  
1.269  
1.253

yzz-15-123-1

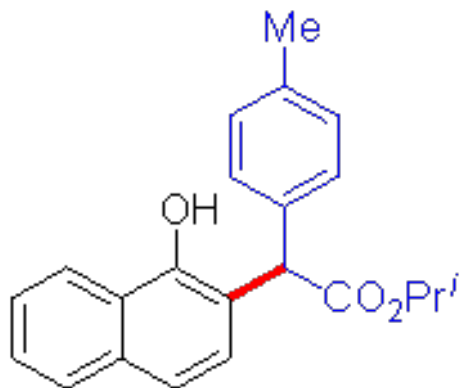

4ag

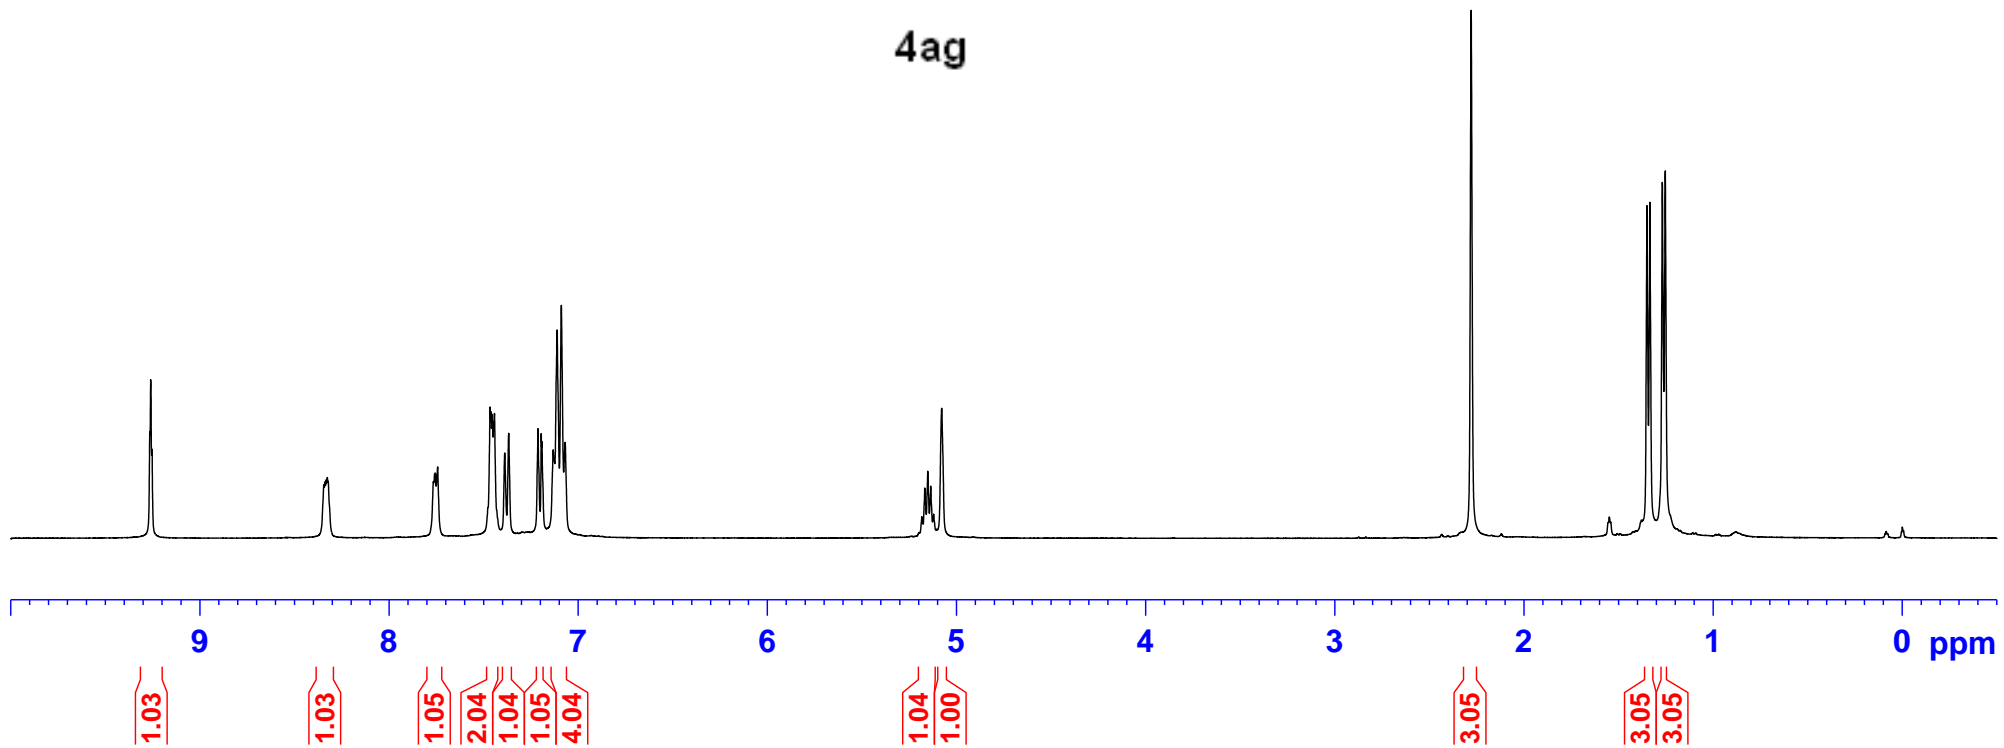

yzz-15-123-1-c

— 176.03

151.64  
137.09  
134.40  
133.84  
129.38  
129.33  
127.21  
127.12  
126.51  
126.47  
125.22  
122.79  
120.00  
116.07

77.32  
77.00  
76.68  
70.51

— 56.34

21.68  
21.58  
20.97

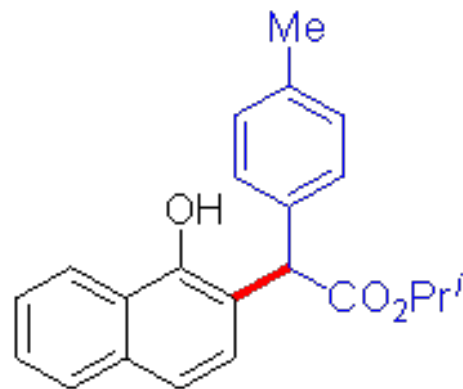

4ag

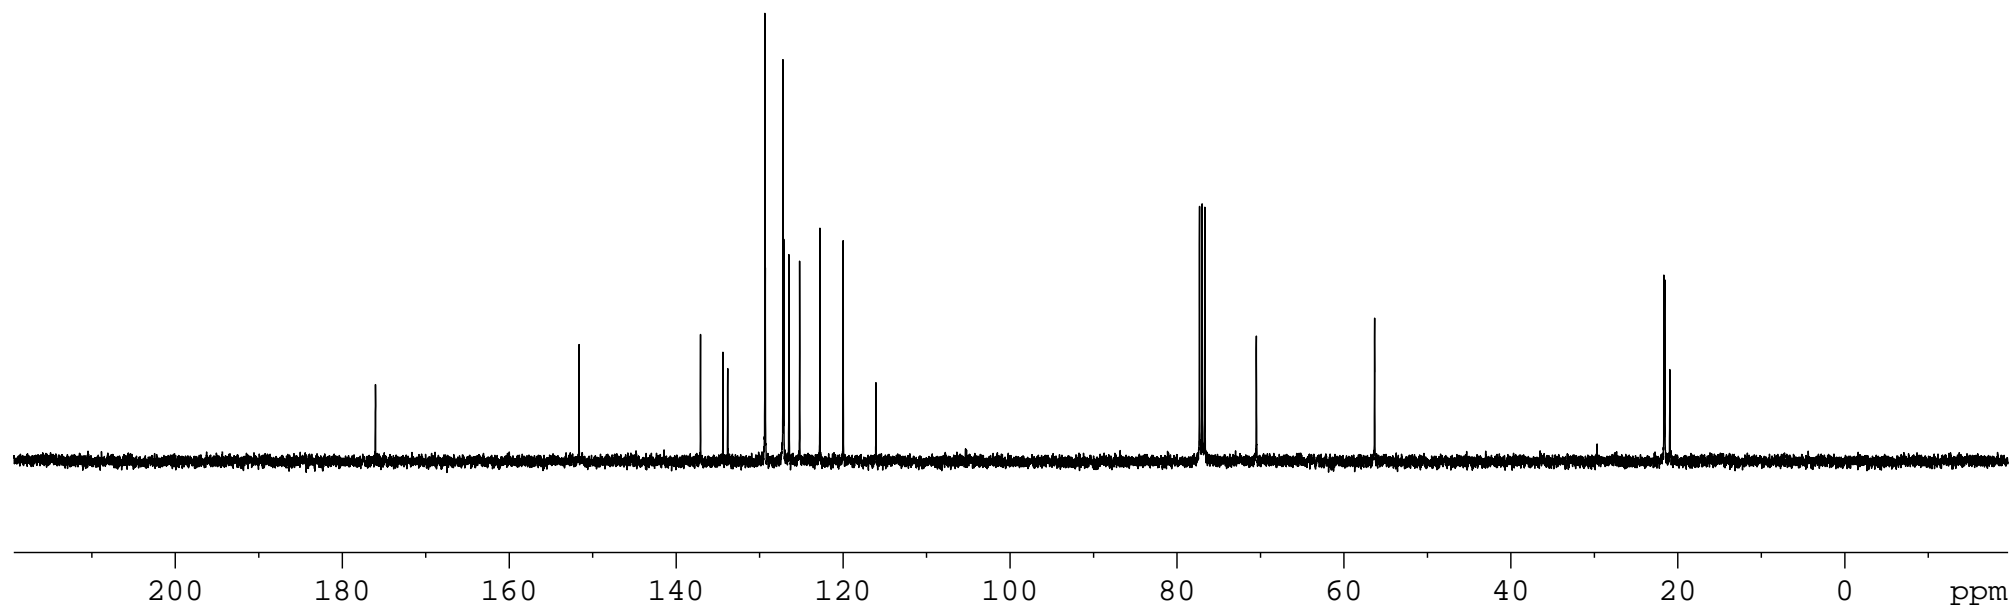

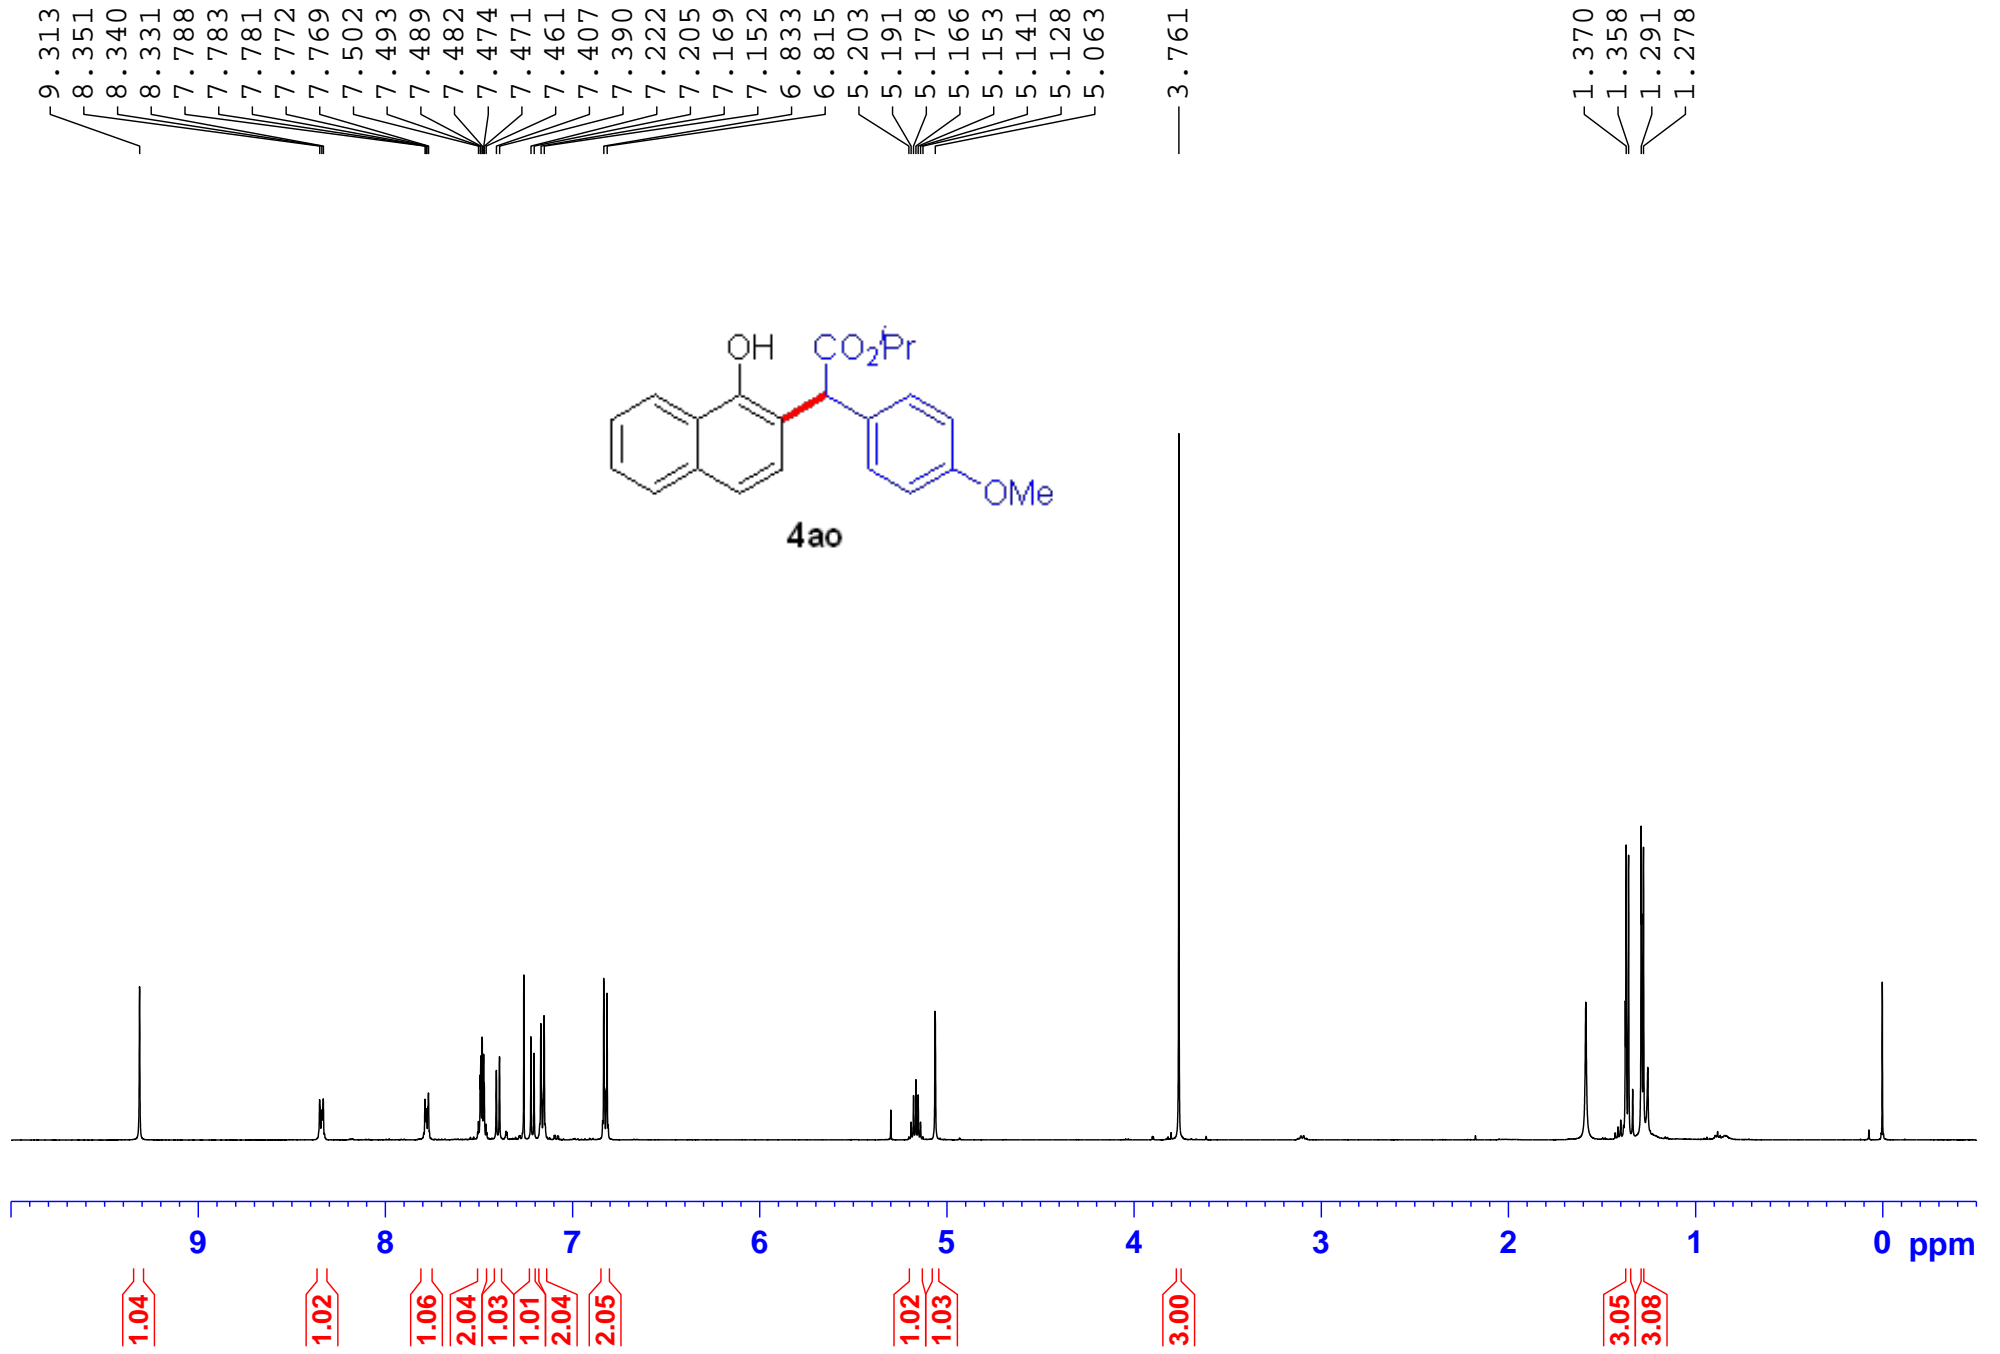

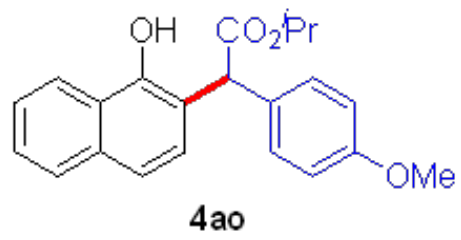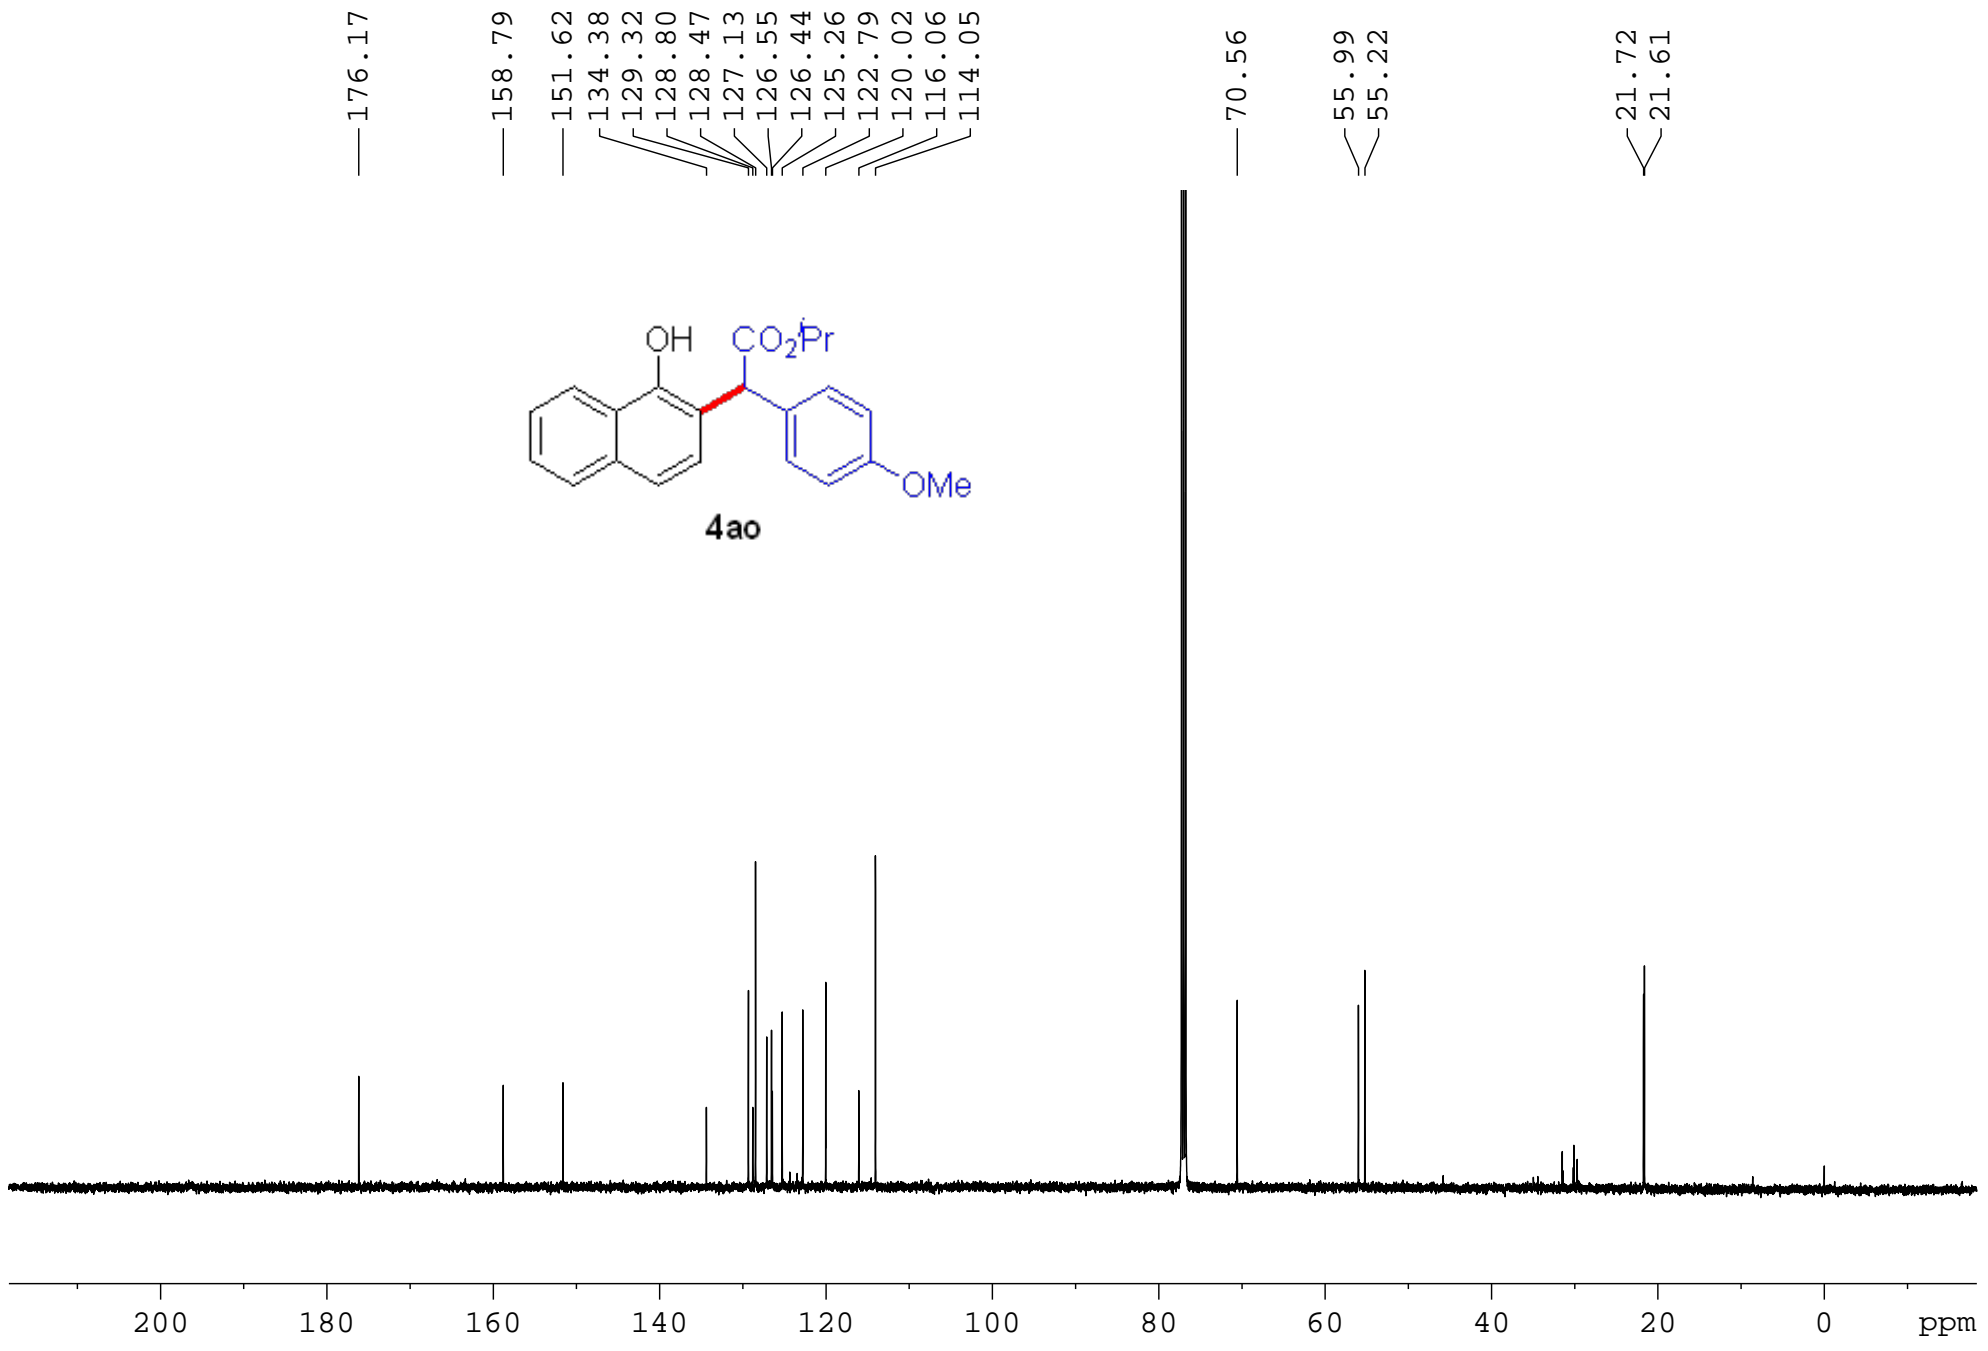

9.171  
8.372  
8.362  
8.358  
8.352  
7.838  
7.834  
7.828  
7.820  
7.593  
7.576  
7.544  
7.540  
7.532  
7.525  
7.521  
7.476  
7.459  
7.411  
7.395  
7.270  
7.253  
5.264  
5.252  
5.239  
5.227  
5.214  
5.211  
5.202  
5.189

1.417  
1.405  
1.329  
1.317

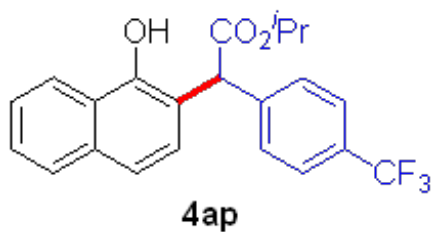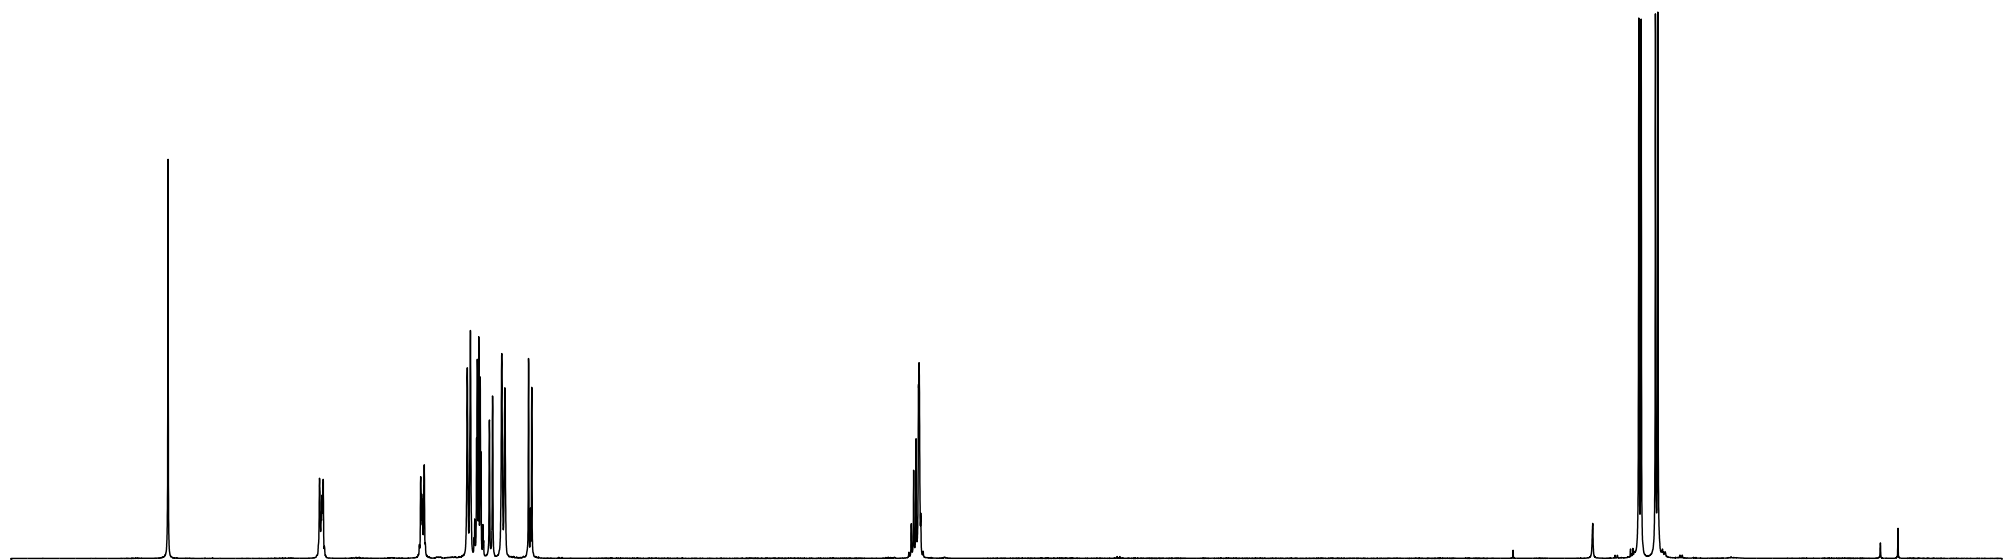

9.5 9.0 8.5 8.0 7.5 7.0 6.5 6.0 5.5 5.0 4.5 4.0 3.5 3.0 2.5 2.0 1.5 1.0 0.5 ppm

1.00

1.00

1.01

2.01

2.02

1.01

2.00

1.02

2.01

3.01

3.09

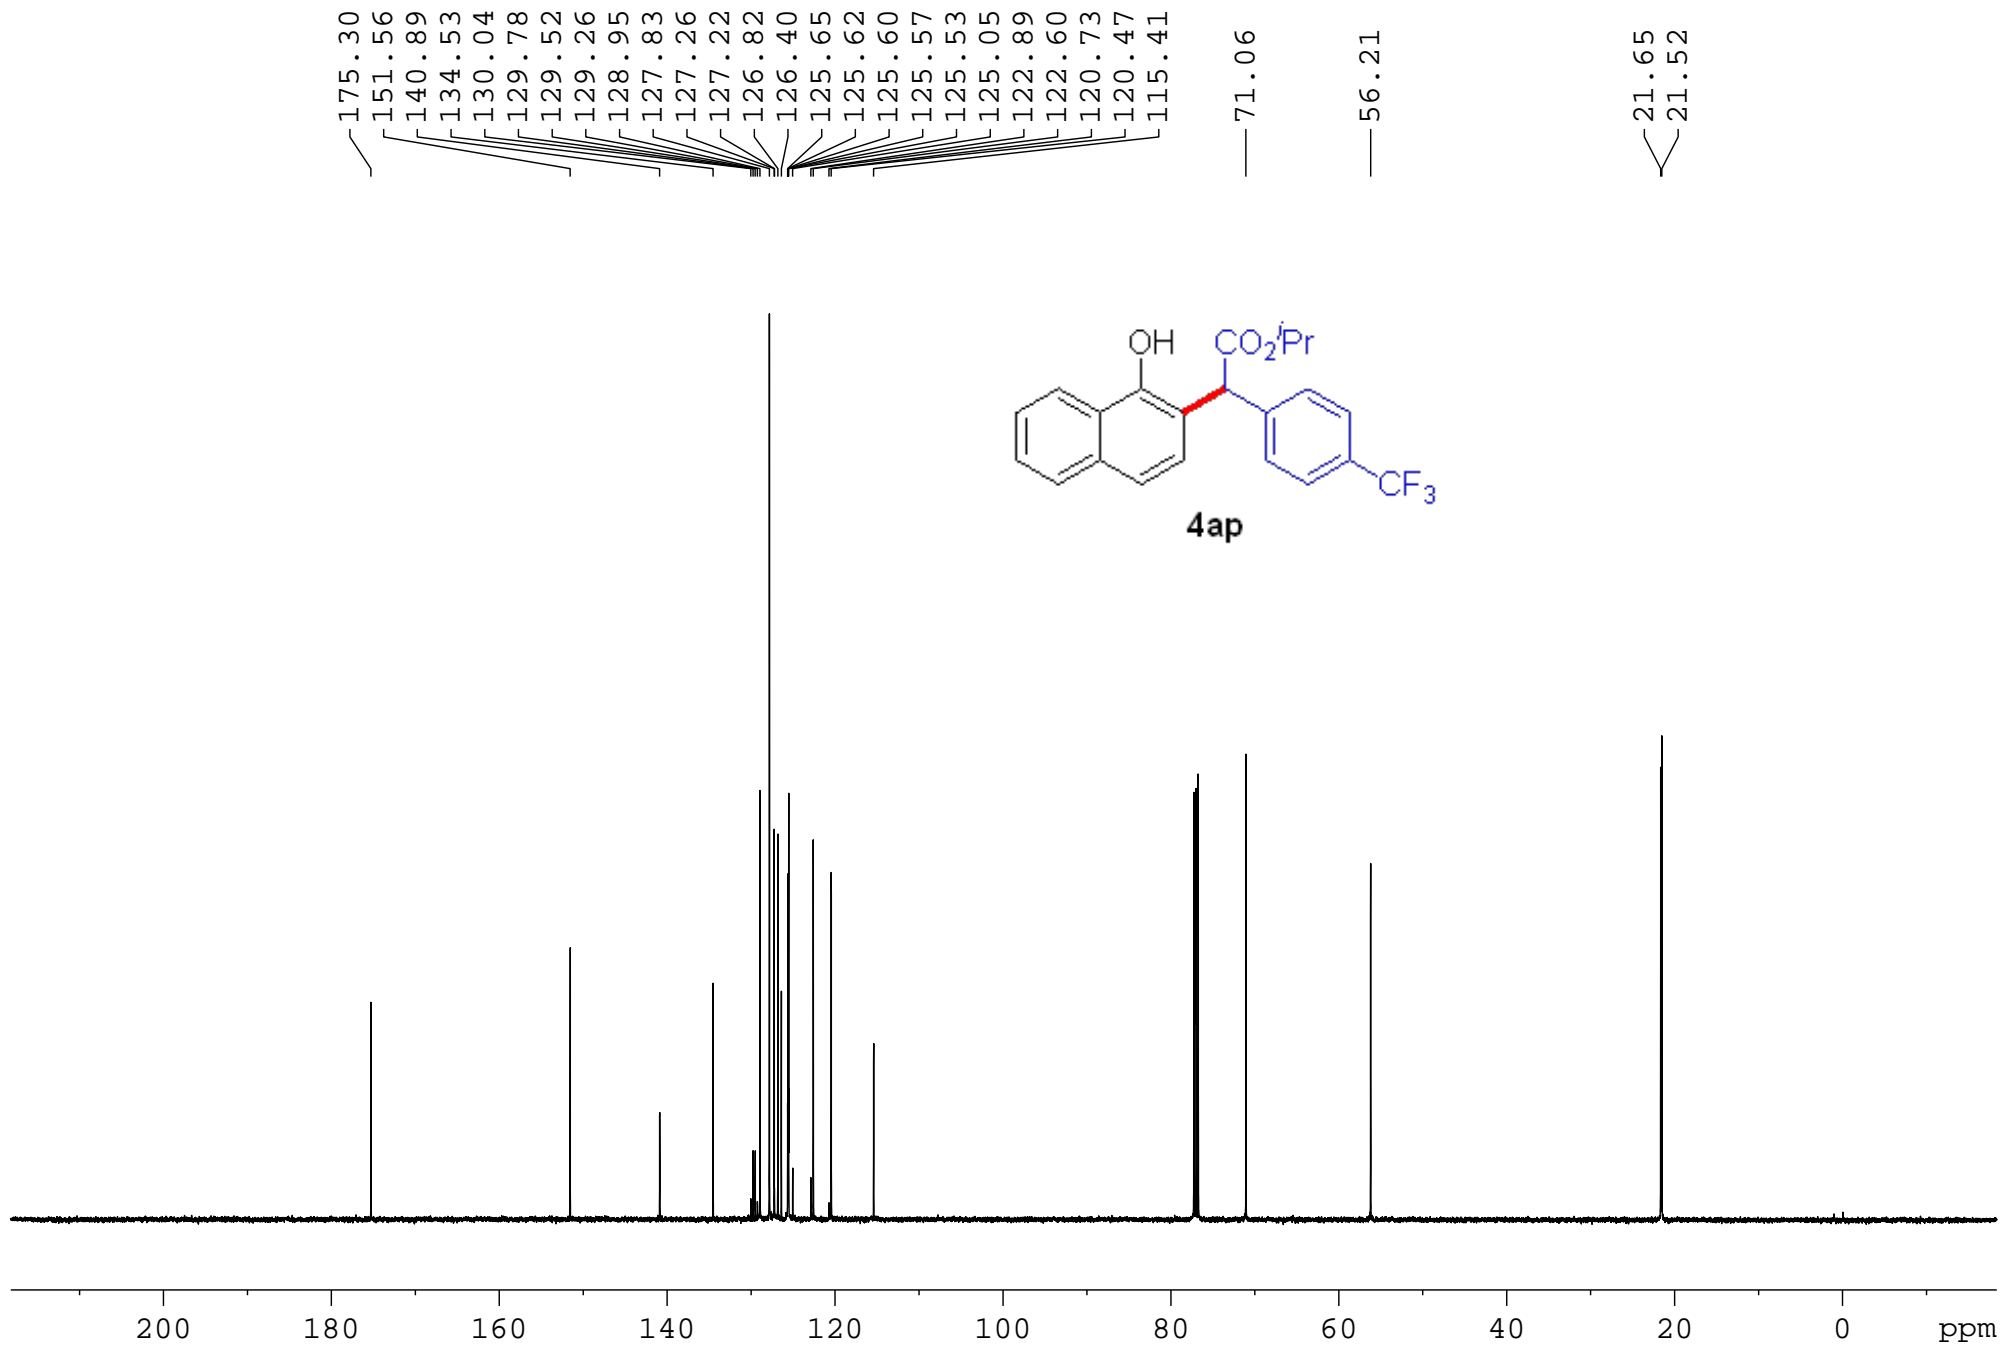

9.264  
8.338  
8.324  
8.314  
7.781  
7.771  
7.758  
7.497  
7.483  
7.472  
7.462  
7.447  
7.405  
7.384  
7.235  
7.233  
7.213  
7.205  
7.197  
7.192  
7.175  
7.125  
7.117  
7.111

— 5.013

— 1.518

yzz-15-138-1

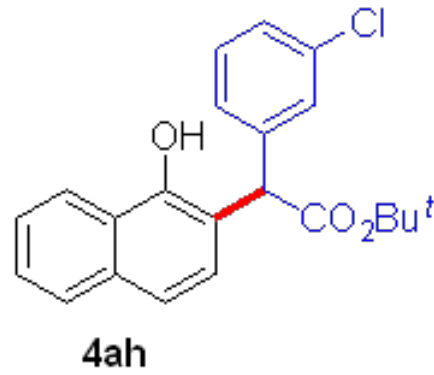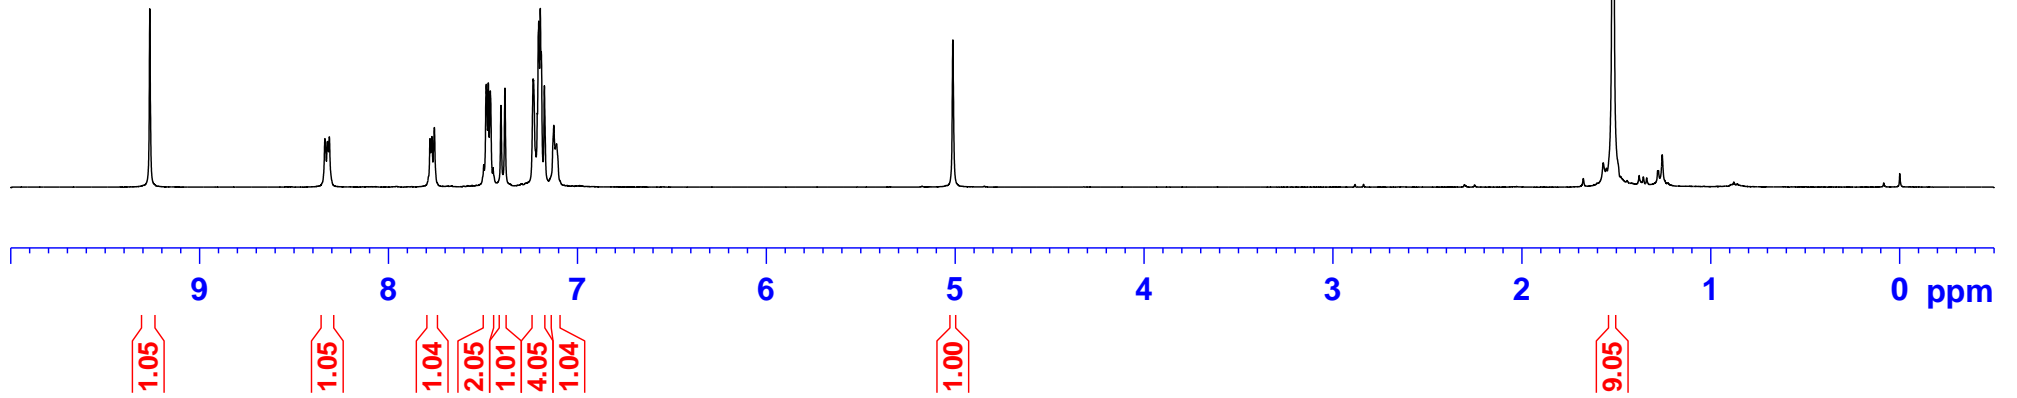

yzz-15-138-1-c

— 175.20

151.68  
139.25  
134.50  
134.48  
129.83  
129.17  
127.64  
127.55  
127.18  
126.67  
126.50  
125.56  
125.35  
122.77  
120.19  
115.66

84.33  
77.32  
77.00  
76.68

— 57.04

— 27.91

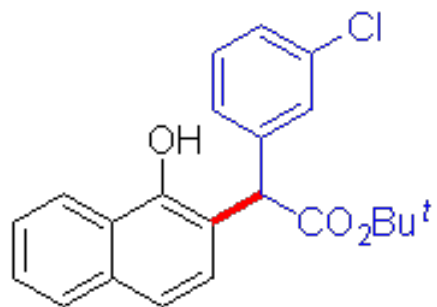

4ah

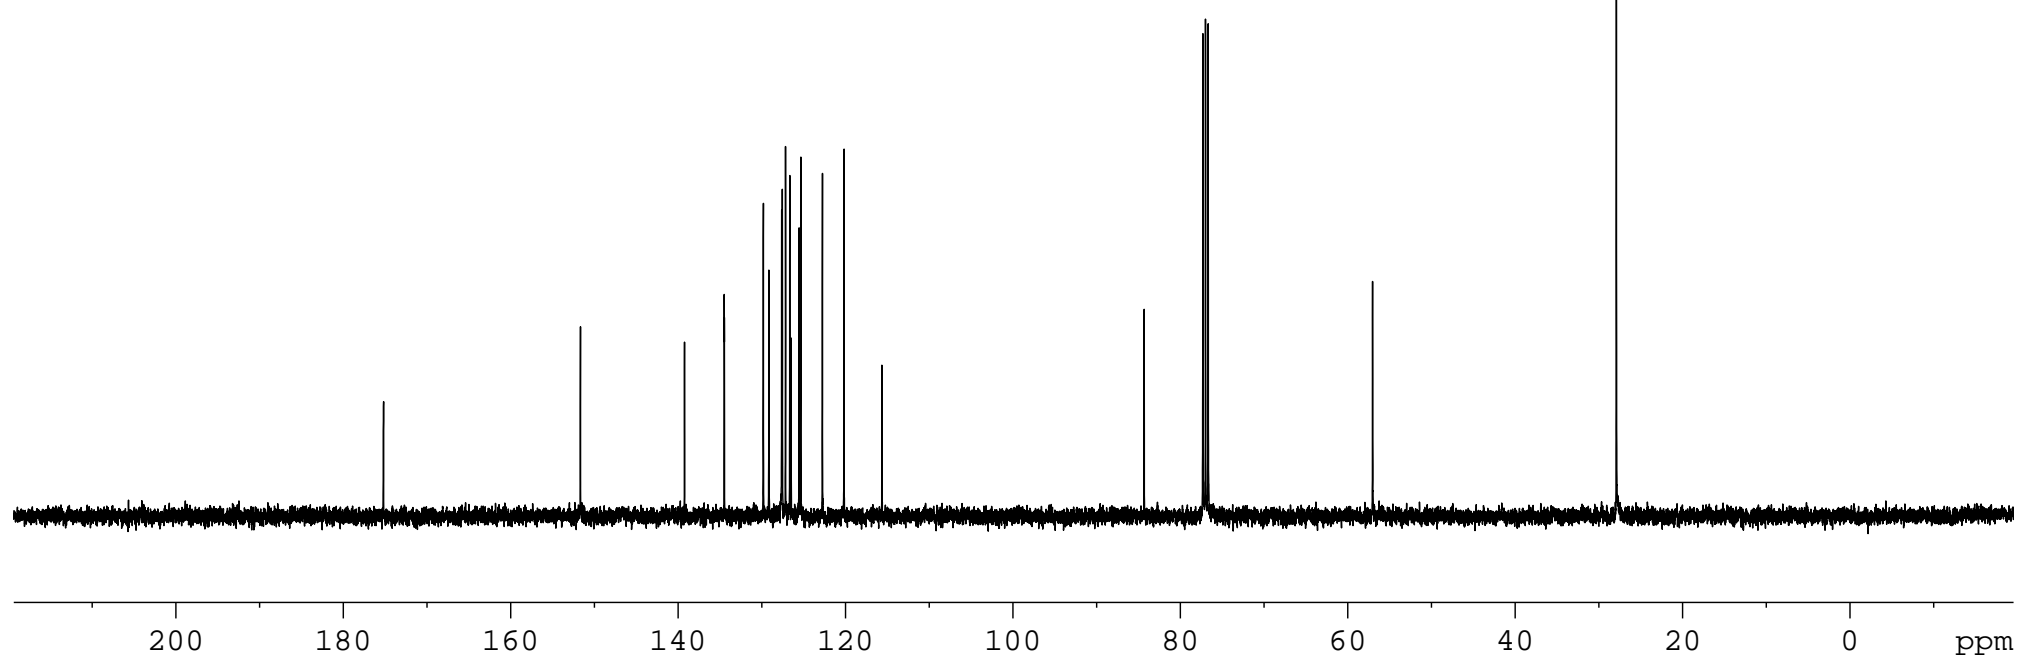



yzz-15-137-1

9.272  
9.269  
8.357  
8.338  
7.809  
7.802  
7.789  
7.526  
7.514  
7.503  
7.492  
7.480  
7.433  
7.413  
7.385  
7.260  
7.220  
7.199  
7.181  
7.162  
7.143

5.033

1.548

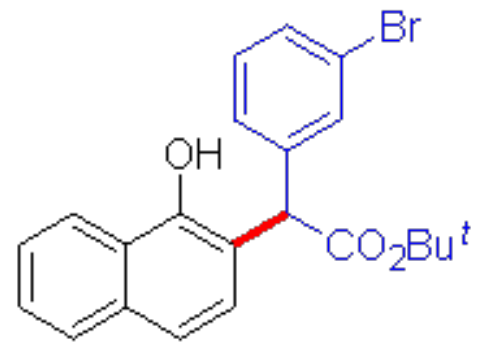

4ai

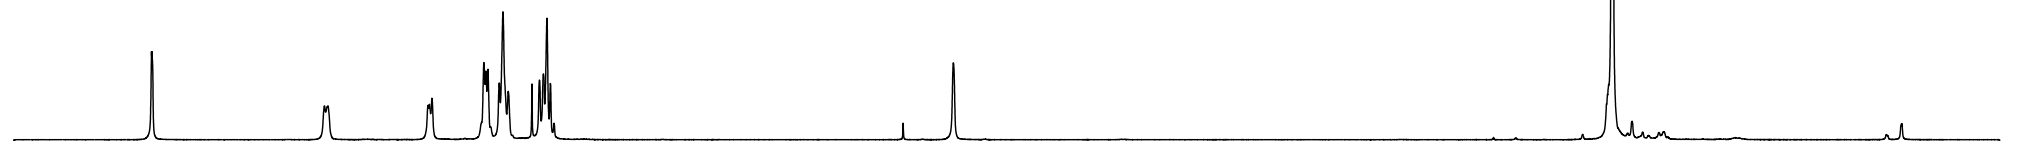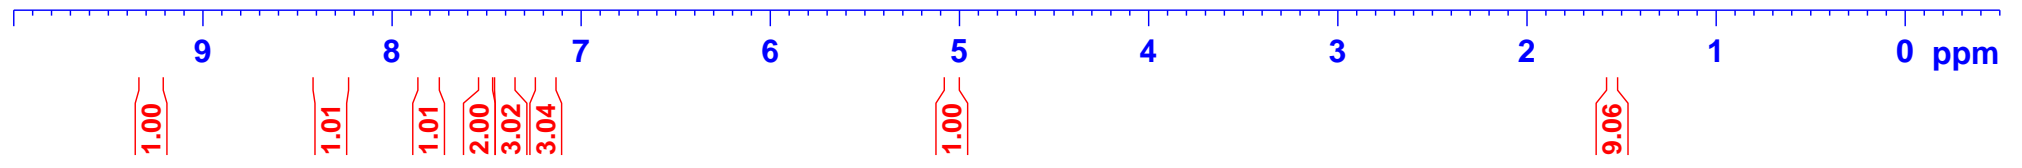

yzz-15-137-1-c

— 175.17

151.66  
139.51  
134.48  
130.53  
130.49  
130.13  
129.15  
127.18  
126.68  
126.50  
126.02  
125.36  
122.77  
122.70  
120.20  
115.65

— 84.35

77.32

77.00

76.68

— 56.99

— 27.92

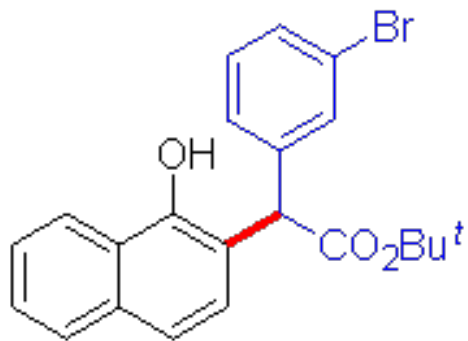

4ai

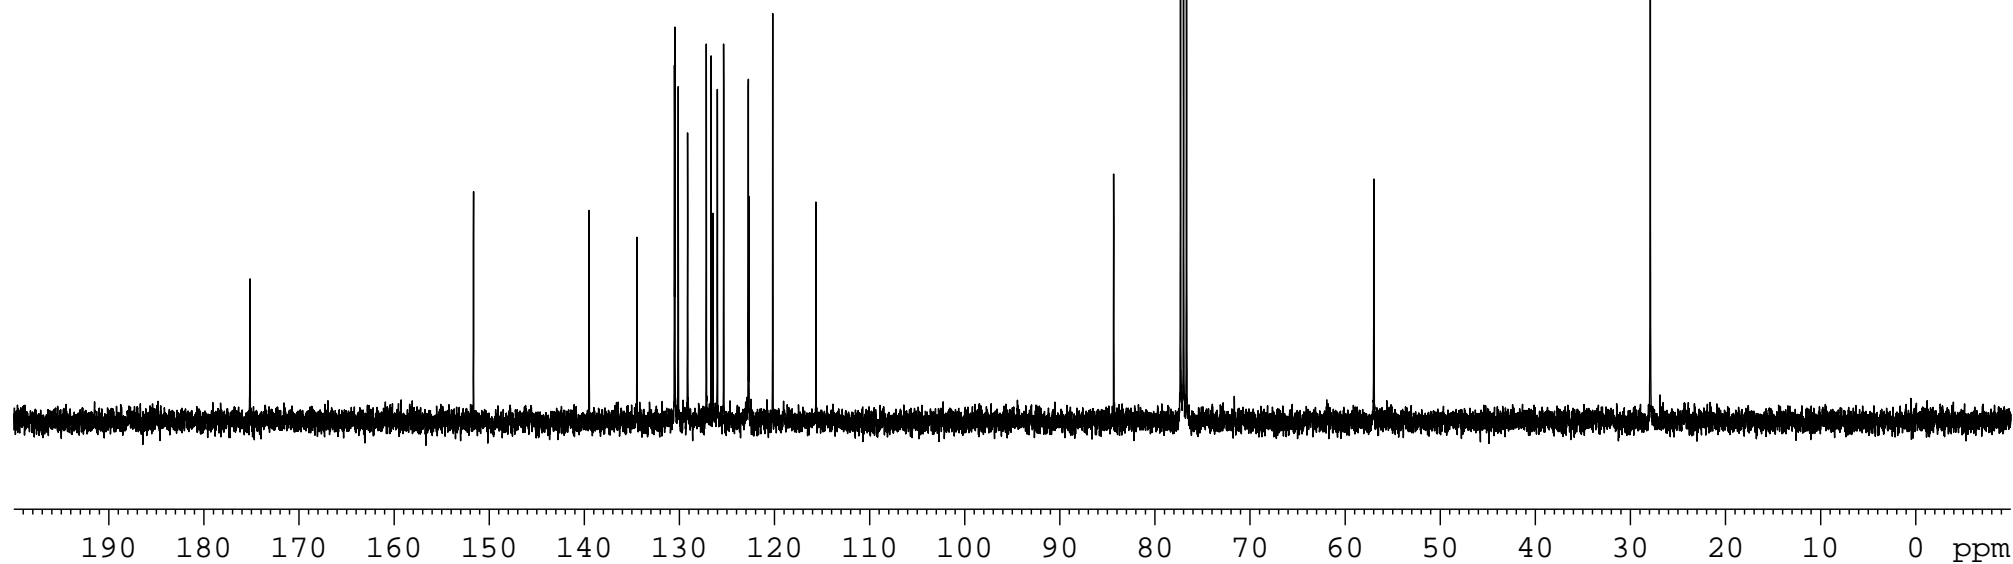

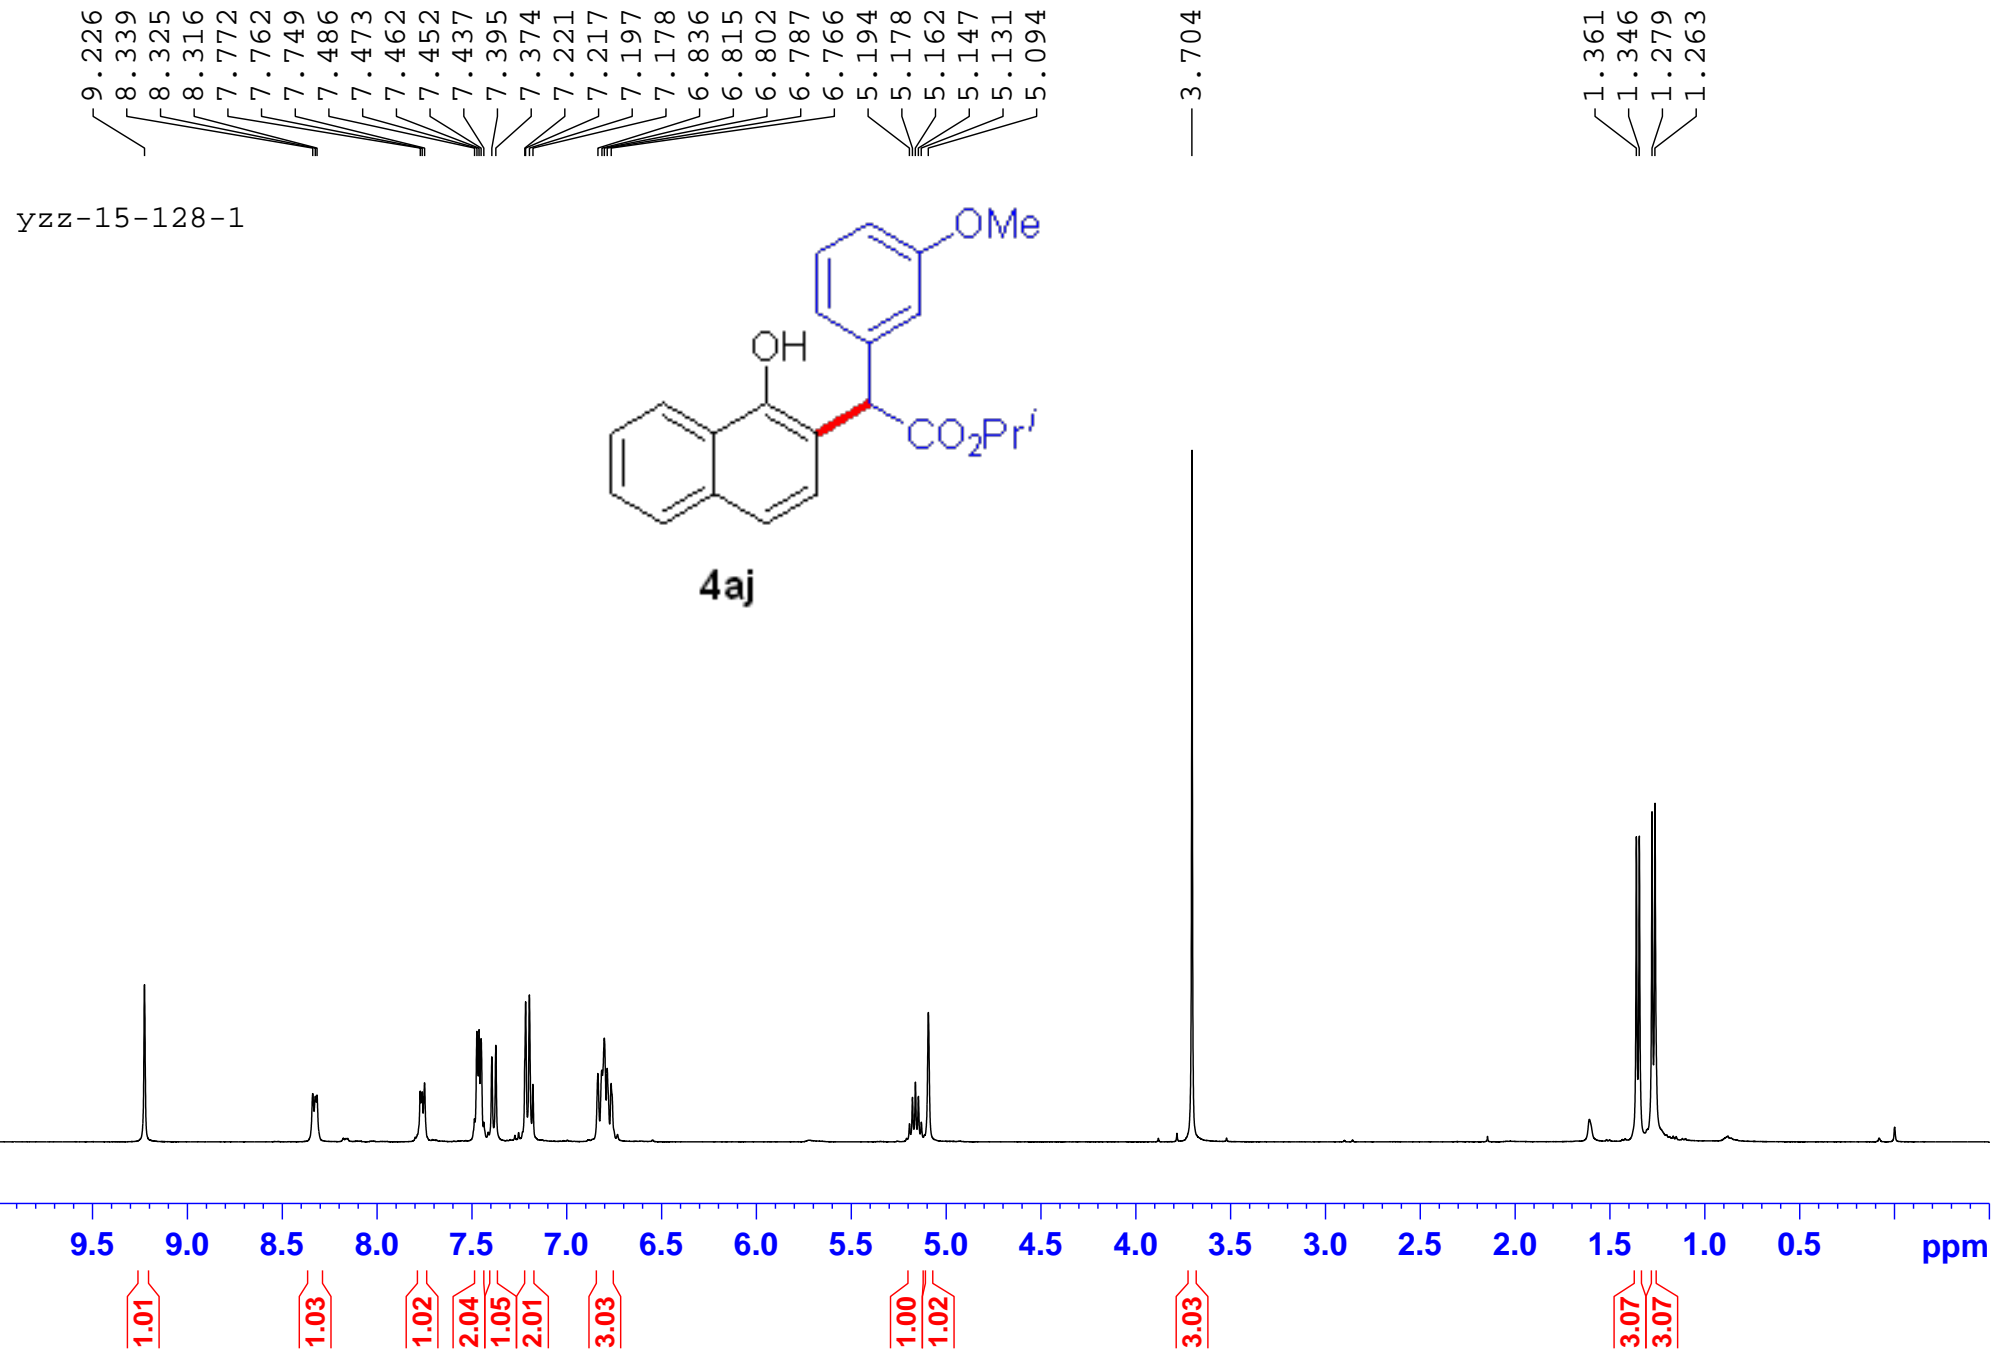

yzz-15-128-1-c

— 175.67  
— 159.77  
— 151.63  
— 138.40  
— 134.43  
— 129.64  
— 129.26  
— 127.13  
— 126.54  
— 126.43  
— 125.25  
— 122.74  
— 120.06  
— 119.71  
— 115.88  
— 113.63  
— 112.44  
  
— 77.32  
— 77.00  
— 76.68  
— 70.58  
  
— 56.51  
— 55.09  
  
— 21.67  
— 21.56

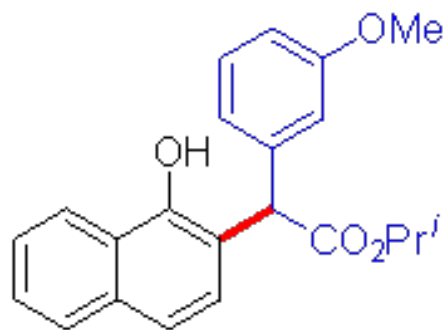

4aj

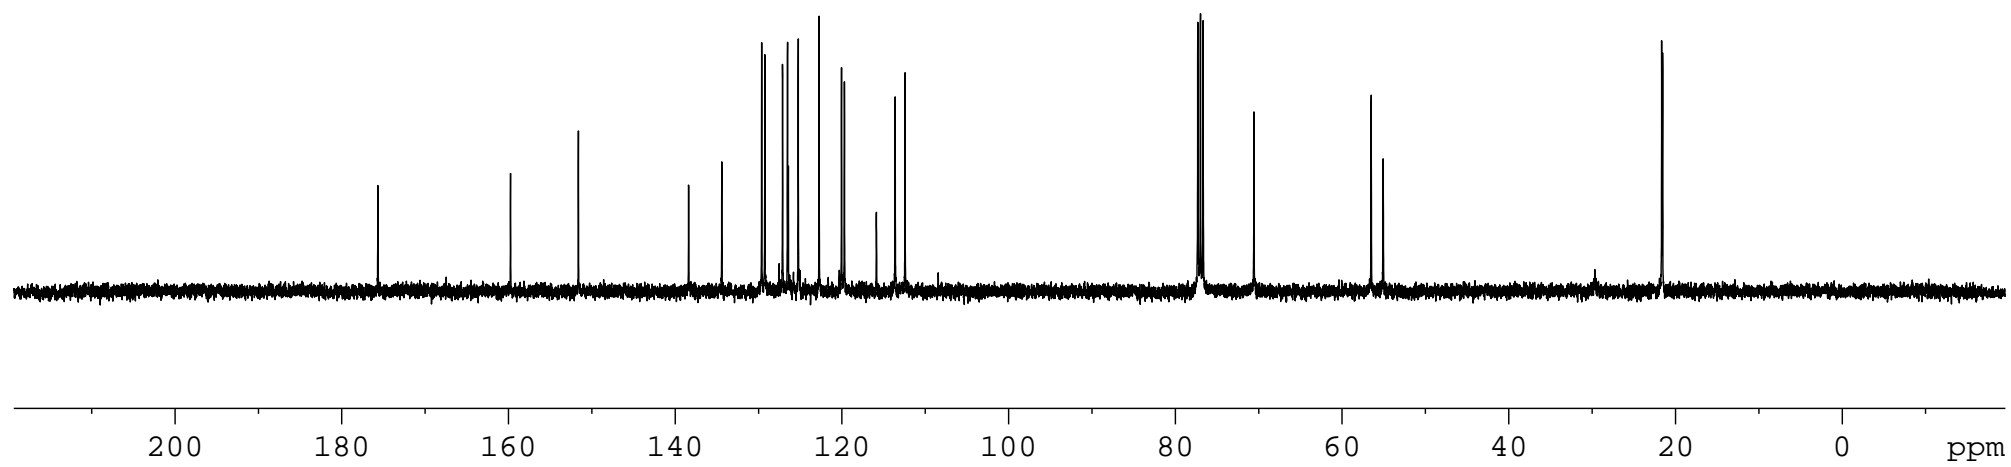

8.327  
8.316  
7.786  
7.775  
7.763  
7.502  
7.490  
7.486  
7.479  
7.471  
7.467  
7.455  
7.421  
7.400  
7.236  
7.224  
7.215  
7.205  
7.202  
7.117  
7.098  
7.081  
7.057  
7.034  
7.023  
7.004  
6.985  
5.236  
5.159  
5.144  
5.128  
5.112  
5.097

1.338  
1.323  
1.221  
1.206

yyz-15-130-1

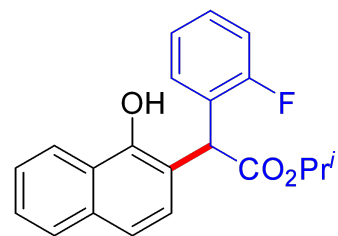

4ak

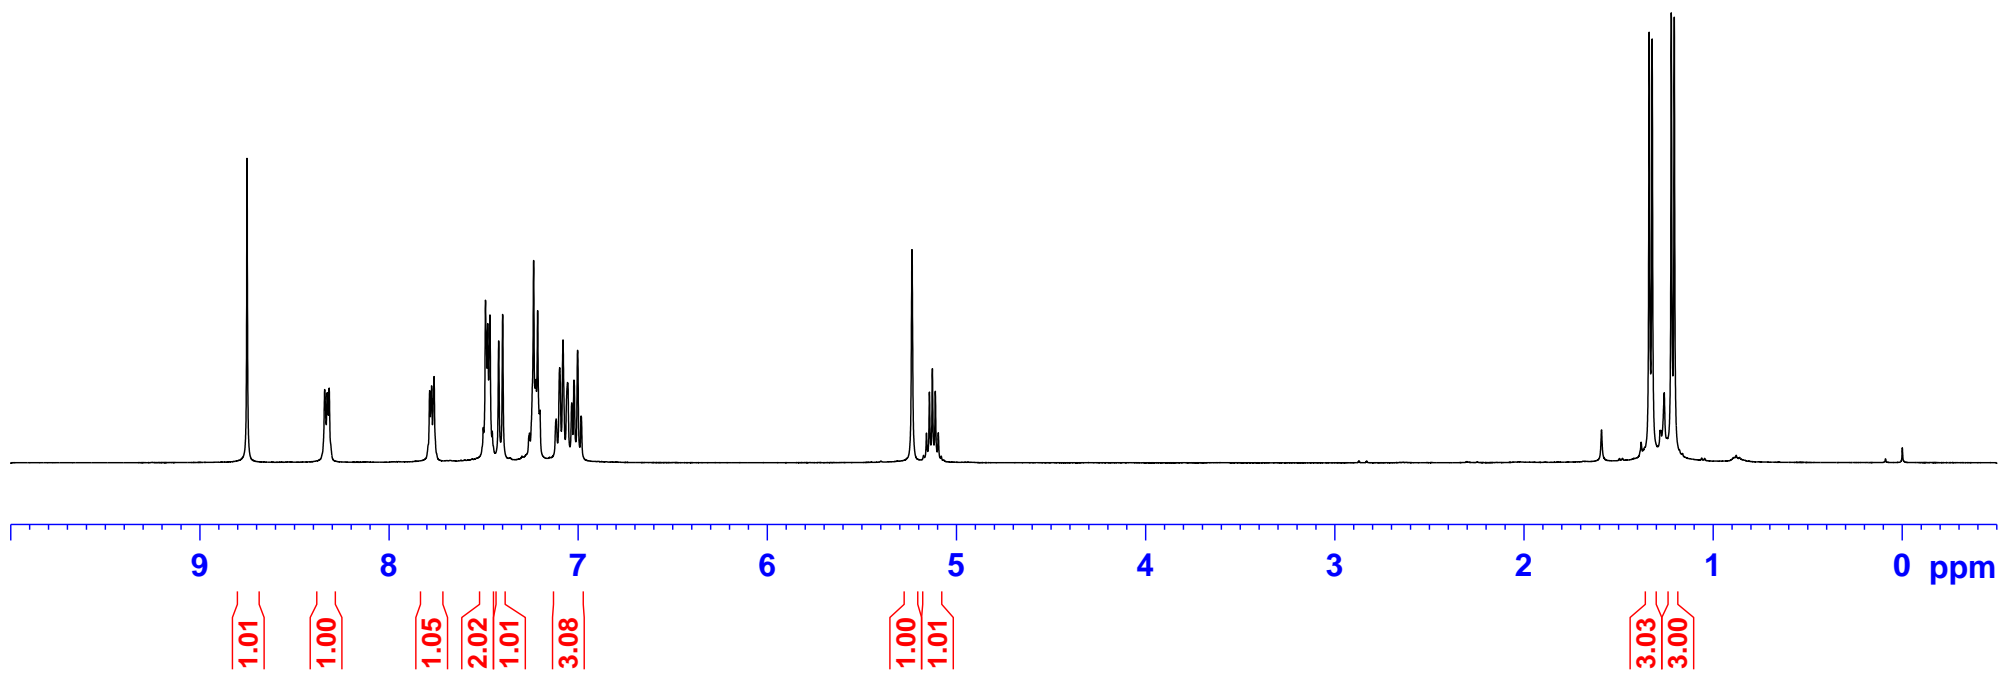

yzz-15-130-1-c

— 174.94

161.91  
159.46  
151.85  
134.53  
129.44  
129.37  
129.19  
127.25  
126.71  
126.20  
125.40  
124.24  
124.20  
123.72  
123.57  
122.63  
120.43  
115.47  
115.25  
113.79

77.32  
77.00  
76.68  
70.62

— 50.82

21.47  
21.37

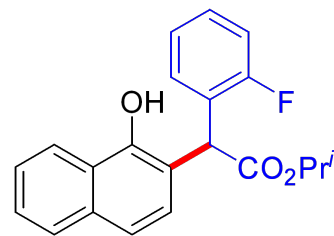

4ak

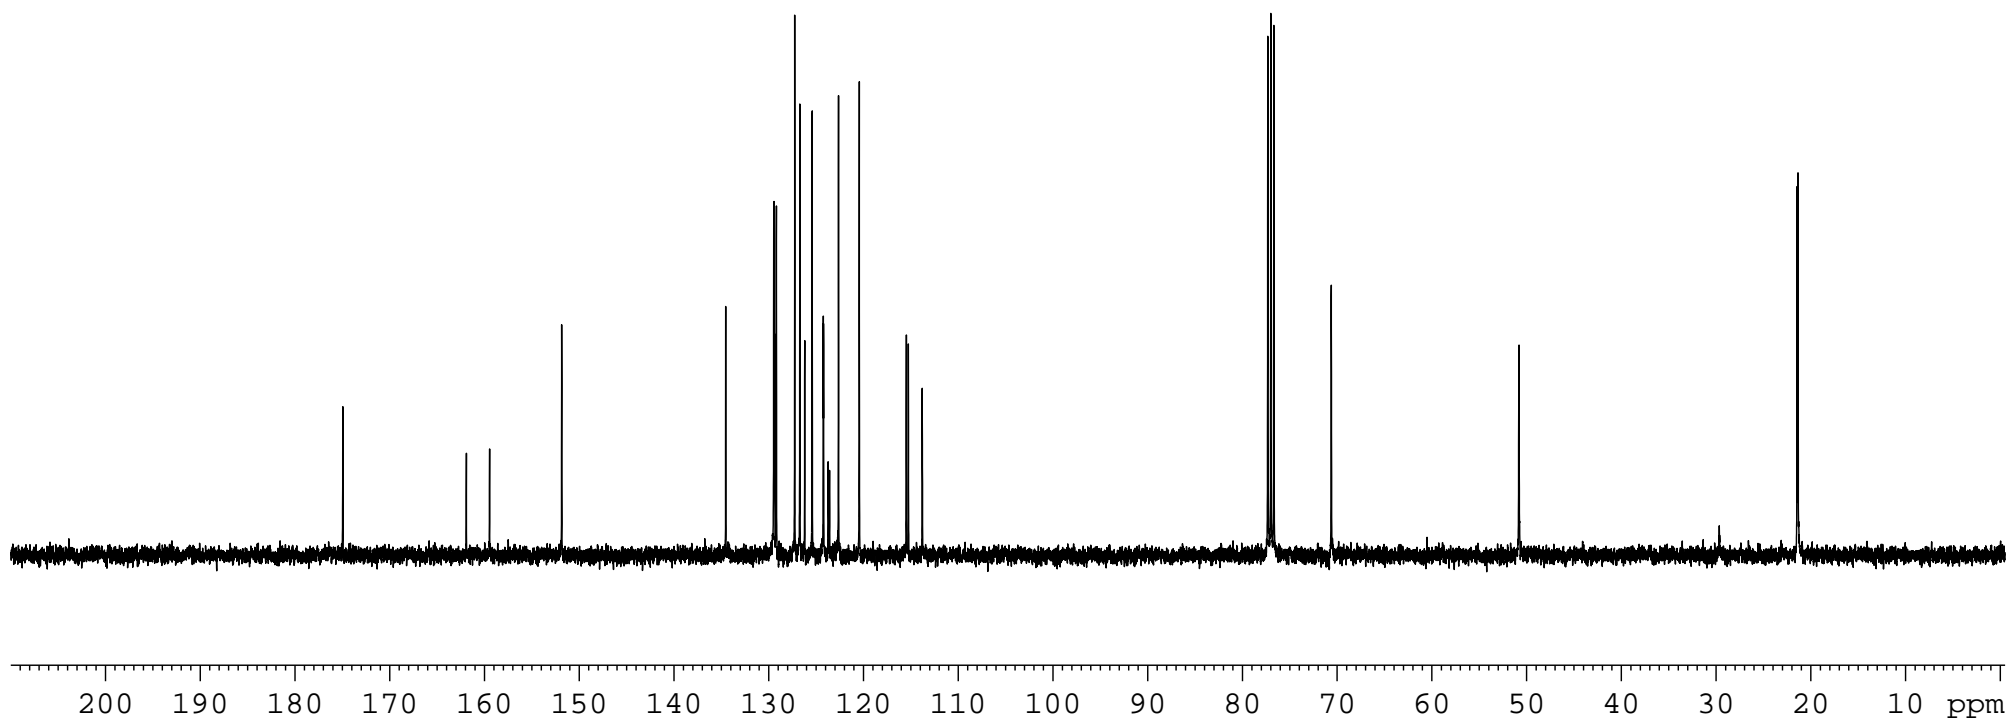

8.329  
8.314  
8.306  
8.259  
7.791  
7.783  
7.768  
7.500  
7.492  
7.485  
7.476  
7.416  
7.396  
7.235  
7.222  
7.215  
7.202  
7.183  
7.164  
7.145  
7.127

5.343

1.459

YZZ-15-140-1

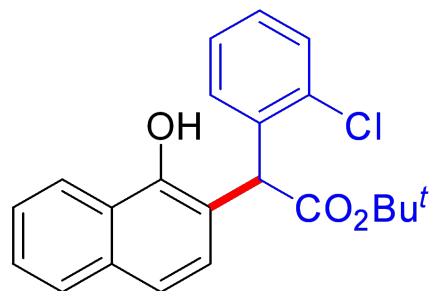

4aI

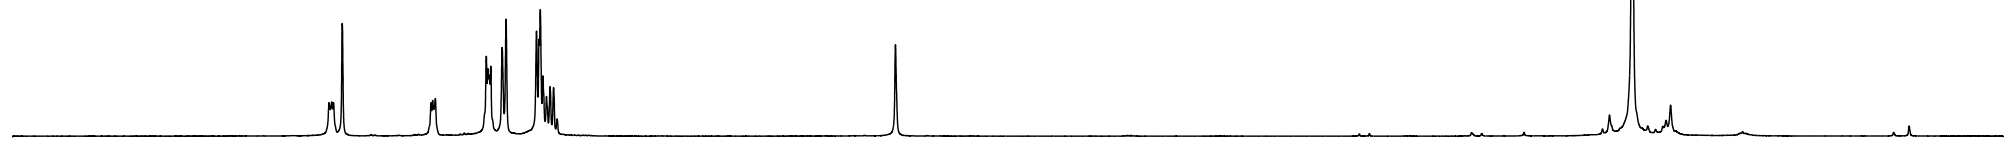

9.5 9.0 8.5 8.0 7.5 7.0 6.5 6.0 5.5 5.0 4.5 4.0 3.5 3.0 2.5 2.0 1.5 1.0 0.5 ppm

1.05  
1.01  
1.04  
2.02  
2.05  
4.04  
1.00  
9.04

YZZ-15-140-1-C

— 174.03  
151.58  
134.39  
134.31  
134.18  
130.00  
129.81  
129.17  
128.89  
127.29  
127.00  
126.64  
126.03  
125.37  
122.52  
120.44  
114.63

83.61  
77.31  
77.00  
76.68

— 54.98

— 27.76

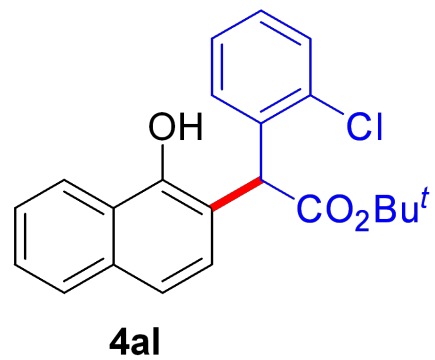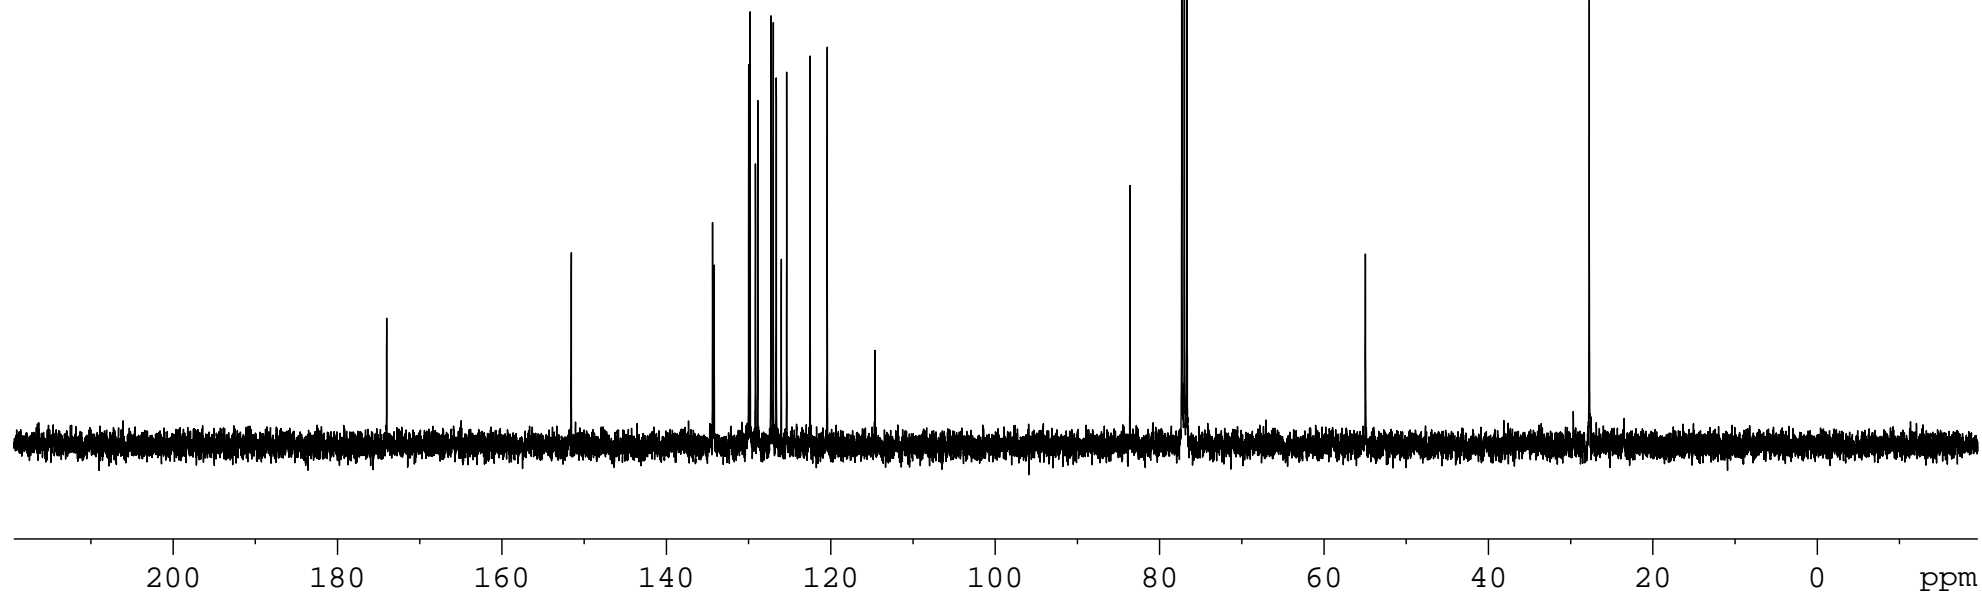



8.303  
8.295  
8.076  
8.074  
7.796  
7.787  
7.785  
7.781  
7.774  
7.615  
7.595  
7.506  
7.498  
7.491  
7.483  
7.420  
7.399  
7.291  
7.272  
7.246  
7.239  
7.225  
7.208  
7.189  
7.143  
7.140  
7.123  
7.105  
5.385

YZZ-15-139-1

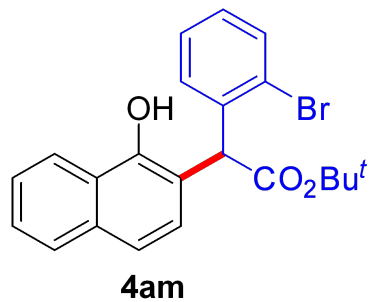

1.468

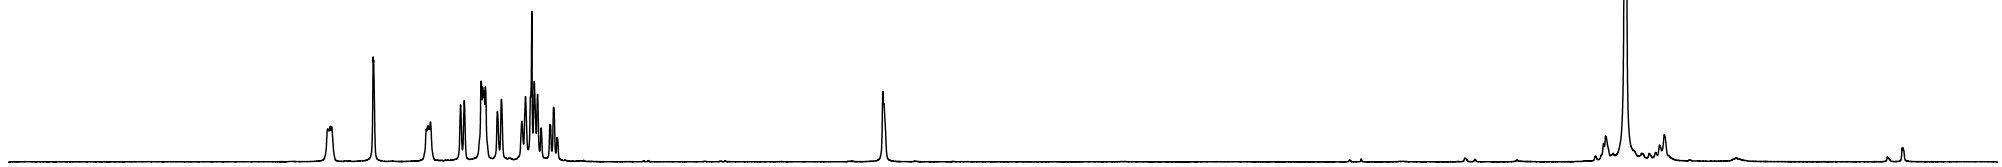

1.08  
1.04  
1.06  
1.05  
2.07  
1.10  
1.06  
2.08  
1.01

1.00

9.07

9

8

7

6

5

4

3

2

1

0 ppm

yzz-15-139-1-c

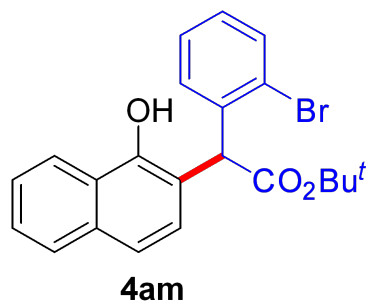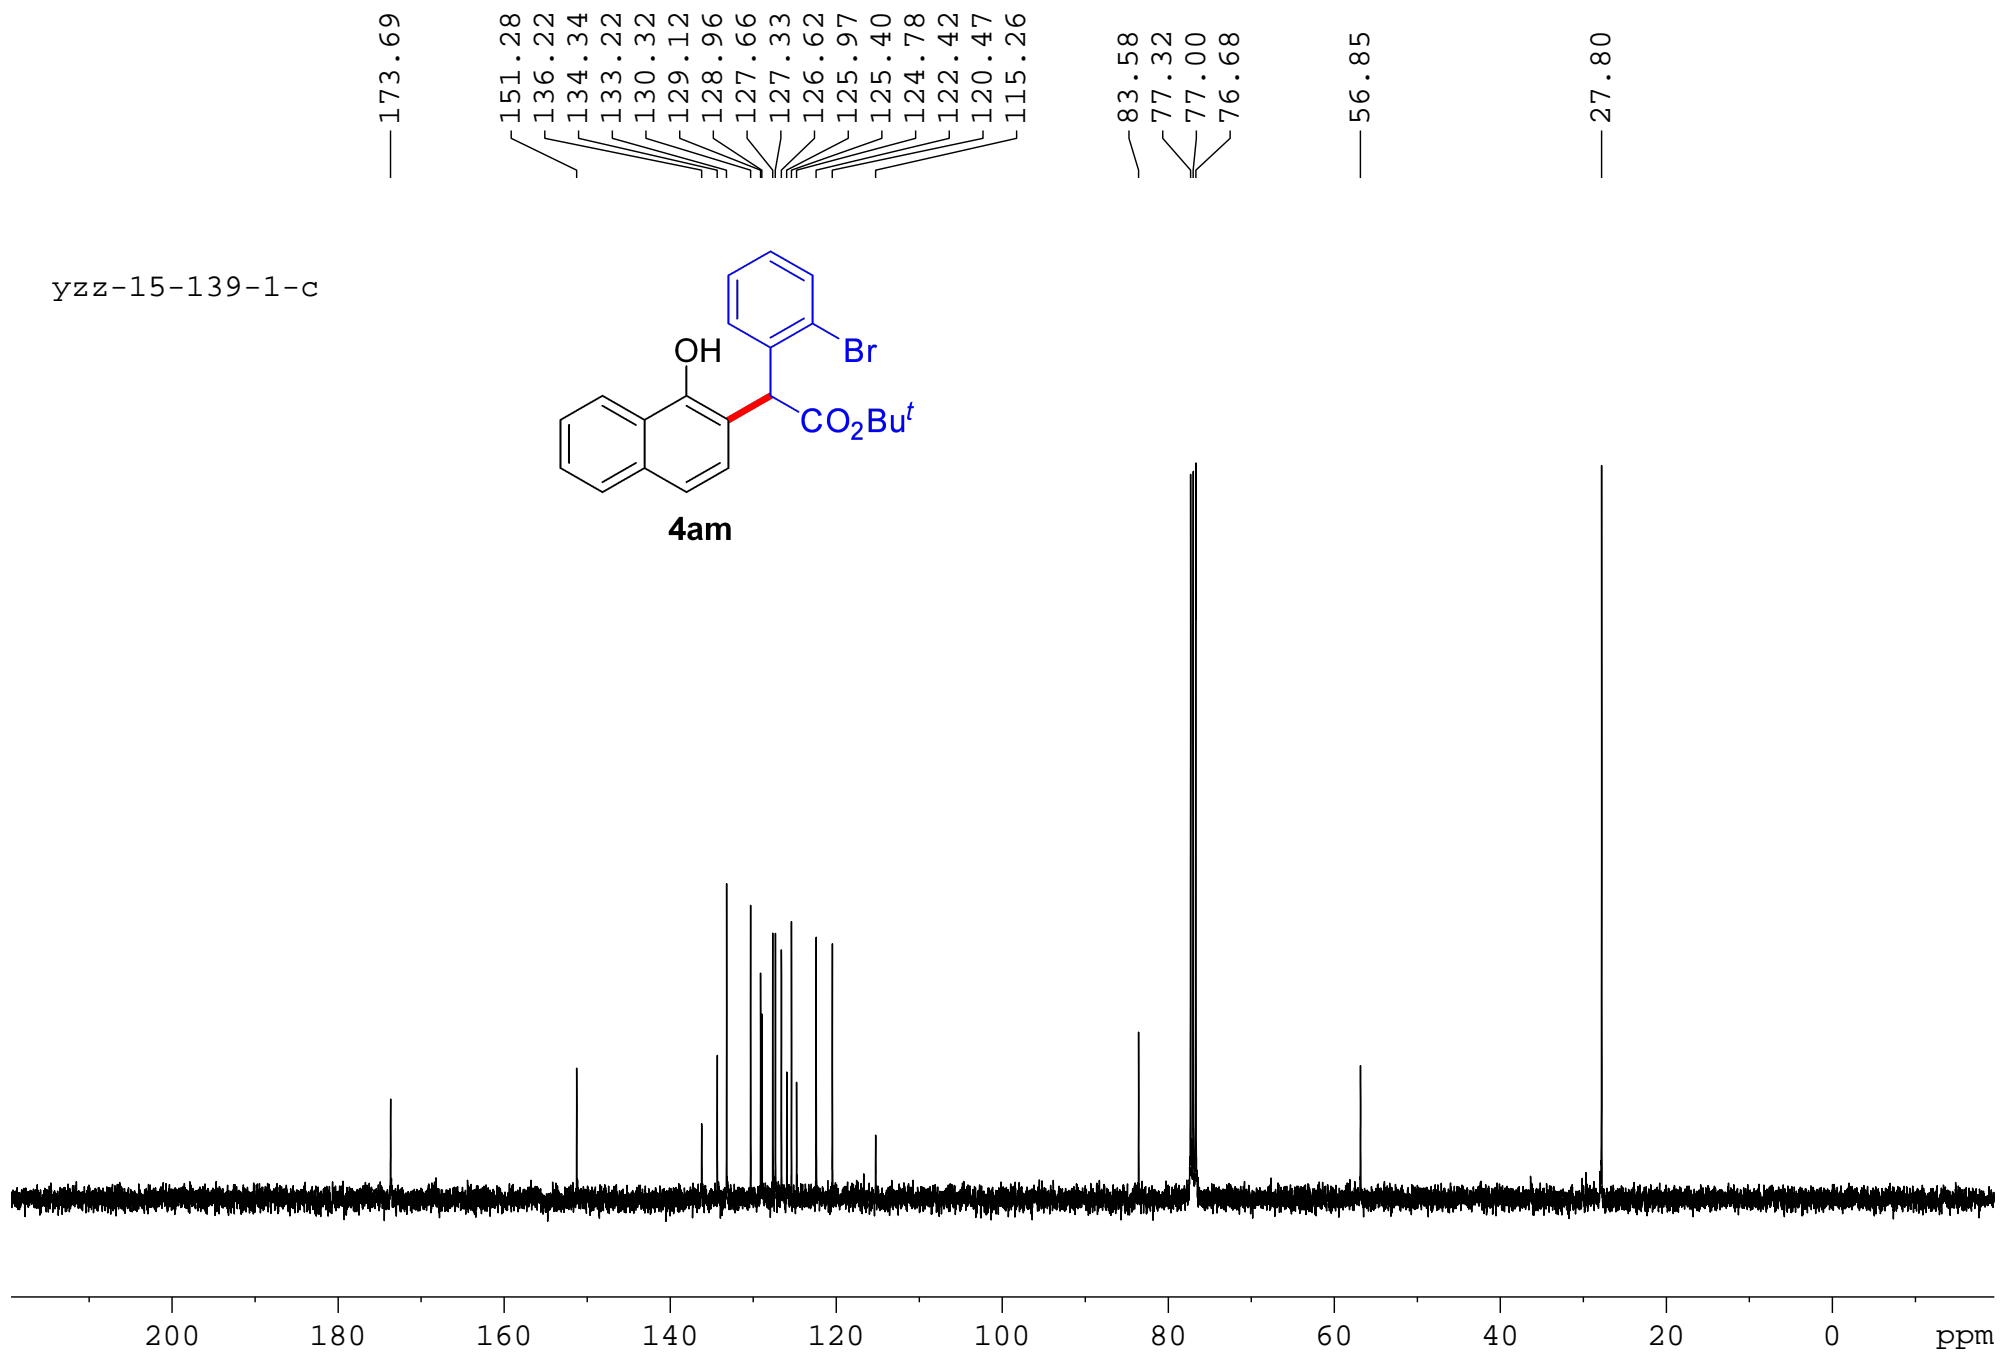

9.245  
8.414  
8.400  
8.392  
7.851  
7.842  
7.824  
7.802  
7.786  
7.779  
7.765  
7.558  
7.543  
7.534  
7.523  
7.507  
7.487  
7.479  
7.466  
7.420  
7.399  
7.347  
7.326  
7.260

yzz-15-134-1

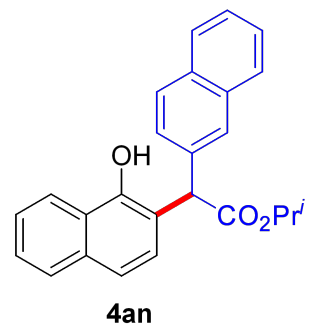

1.439  
1.423  
1.354  
1.338

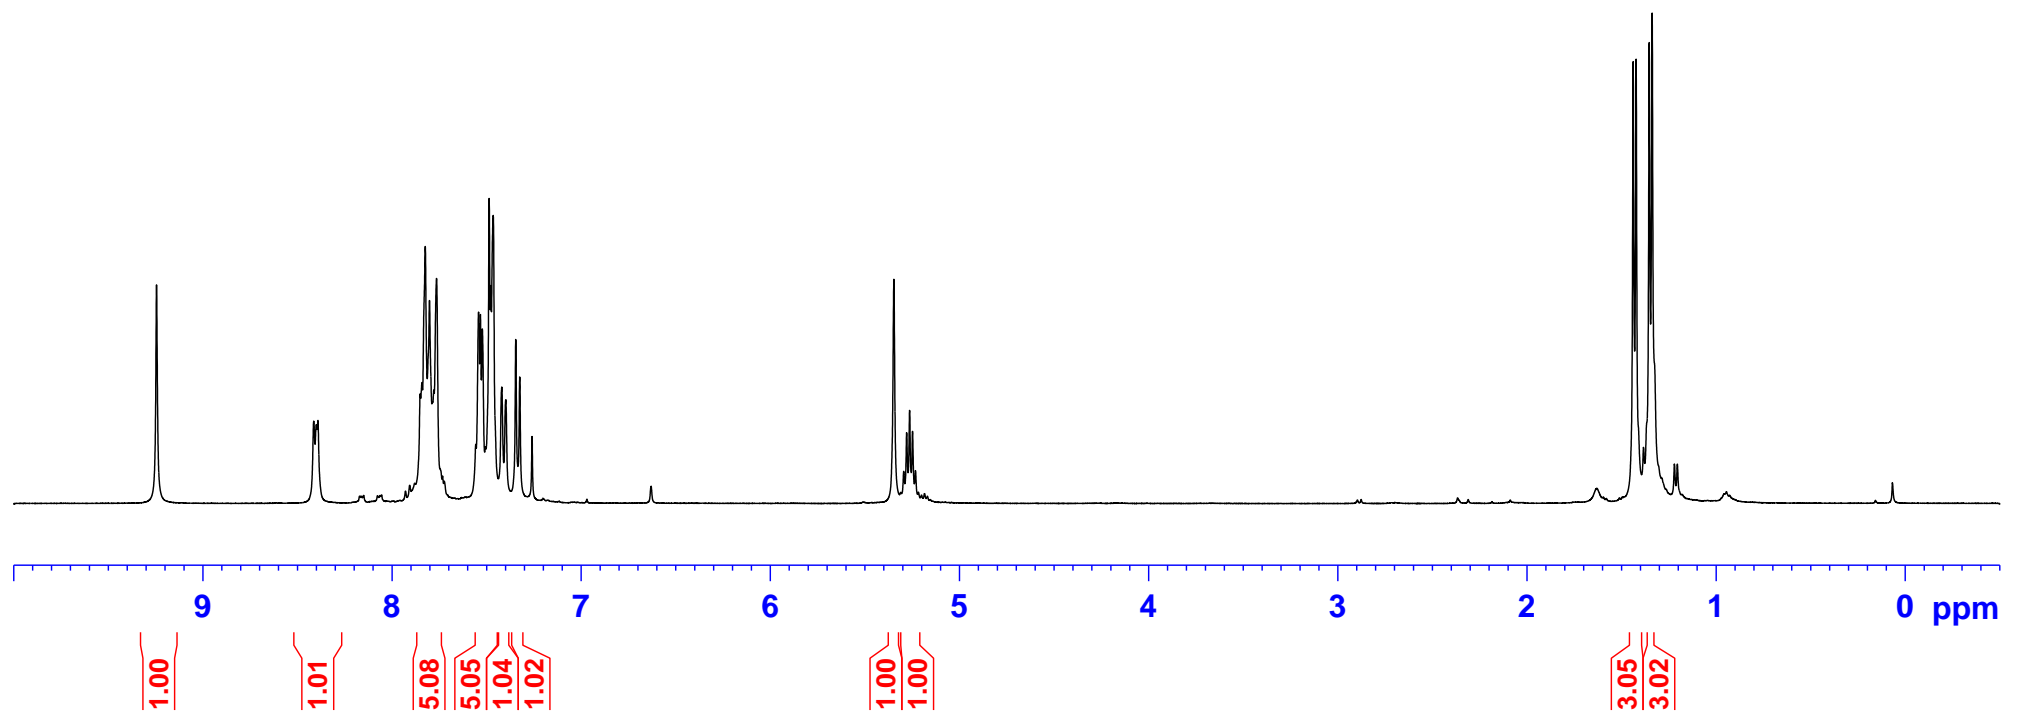

yyy-15-134-1-c

175.65  
151.71  
134.46  
134.22  
133.26  
132.55  
129.29  
128.48  
128.06  
127.49  
127.18  
126.60  
126.46  
126.21  
126.11  
126.07  
125.56  
125.30  
122.77  
120.14  
115.96  
77.32  
77.00  
76.68  
70.64  
56.66  
21.72  
21.59

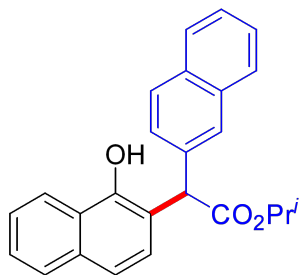

4an

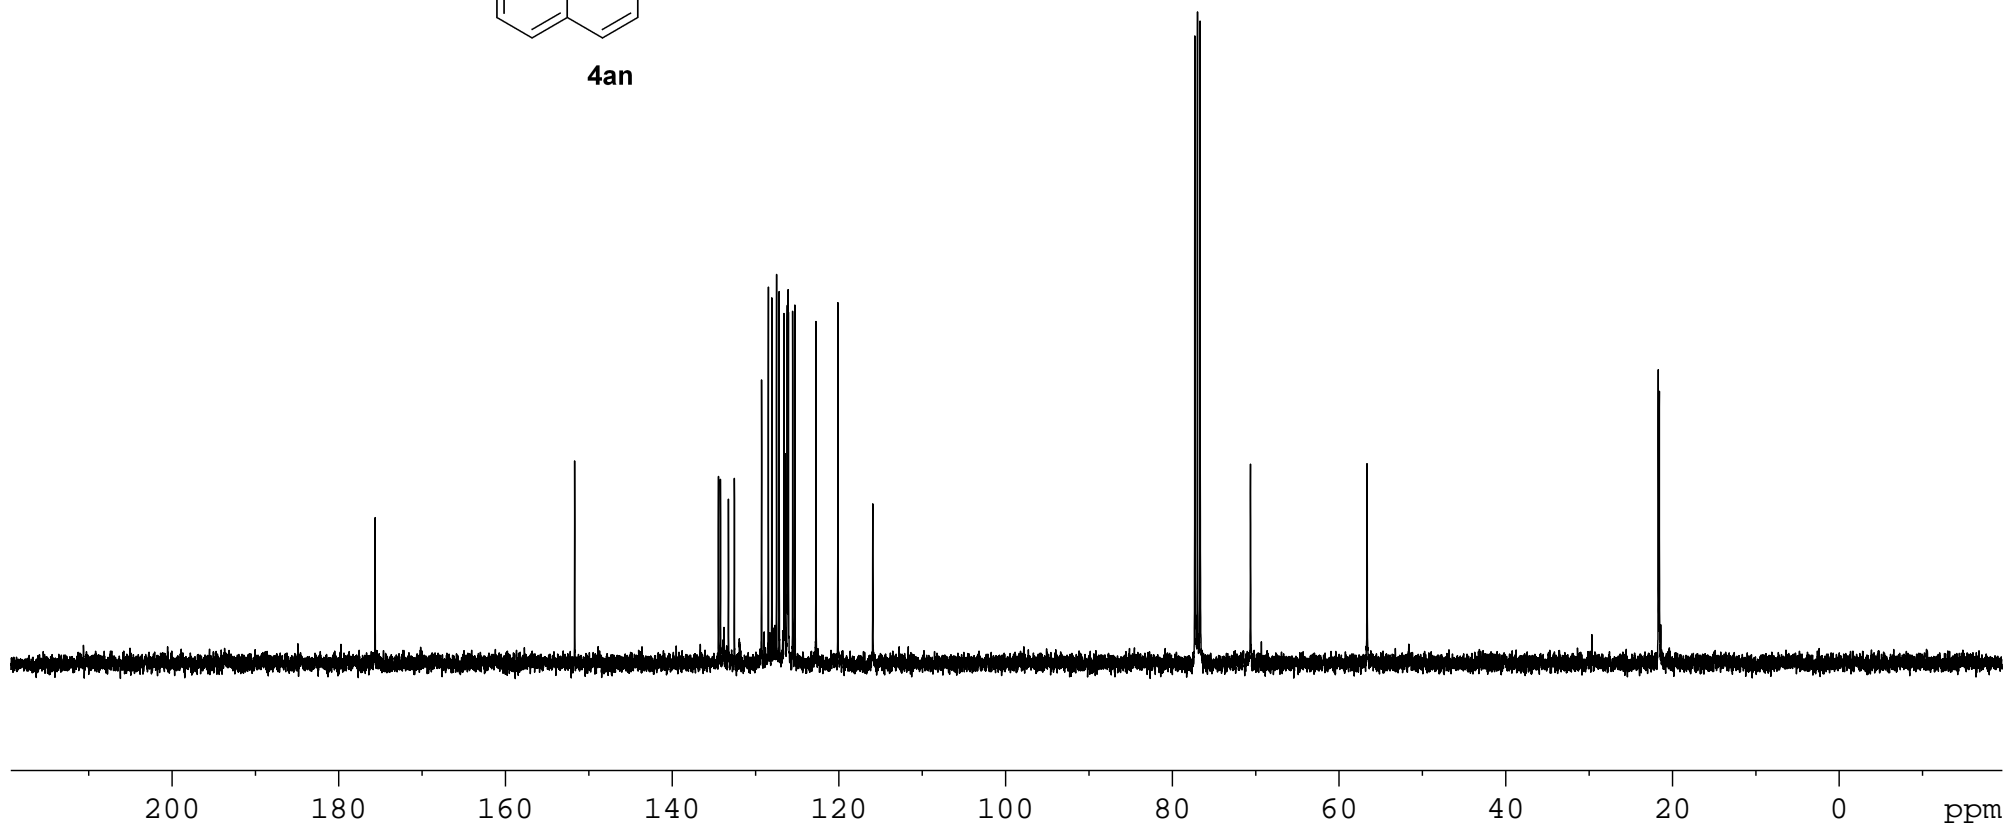

YZZ-16-001-3

8.982  
8.184  
8.164  
7.929  
7.907  
7.491  
7.471  
7.453  
7.324  
7.305  
7.287  
7.256  
7.237  
7.220  
7.212  
7.195  
7.186  
7.167  
6.521  
5.797

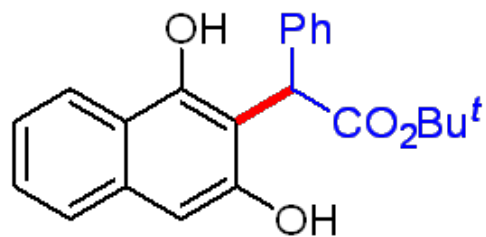

4bd

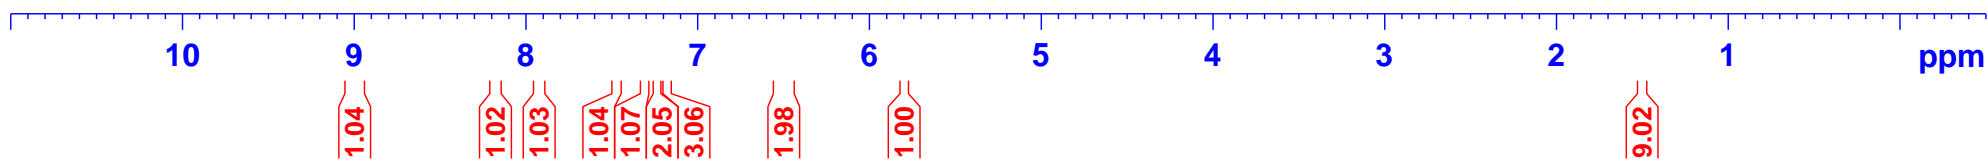

1.496

yyy-16-001-3-c

— 176.32

154.33  
153.07

137.51  
134.23  
128.48  
127.60  
127.37  
127.03  
122.71  
122.31  
121.63  
120.96  
107.63  
103.12

83.77  
77.32  
77.20  
77.00  
76.68

— 49.43

— 27.94

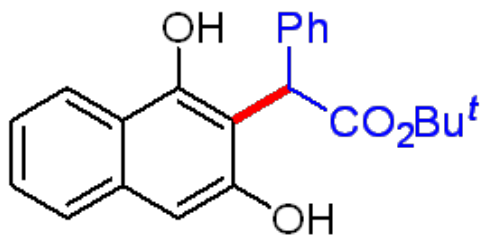

4bd

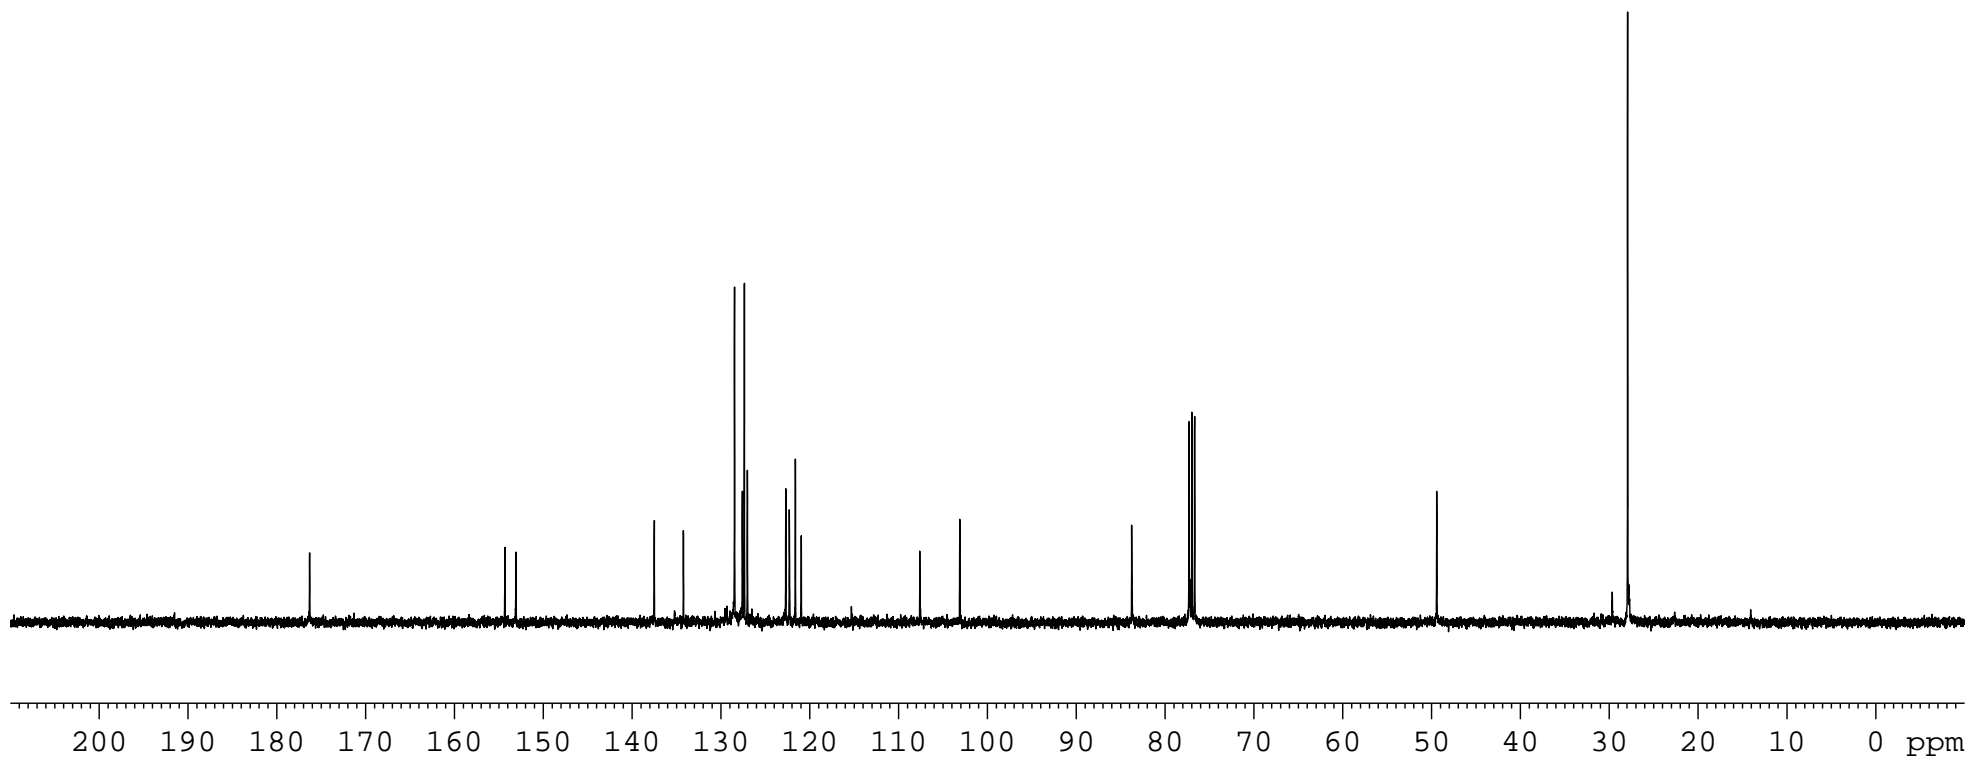

YZZ-15-012-1

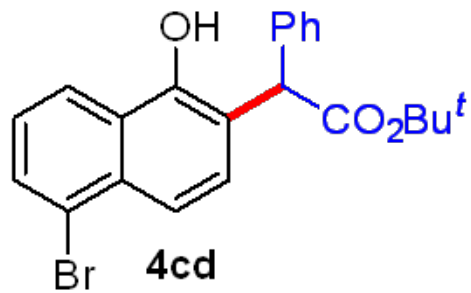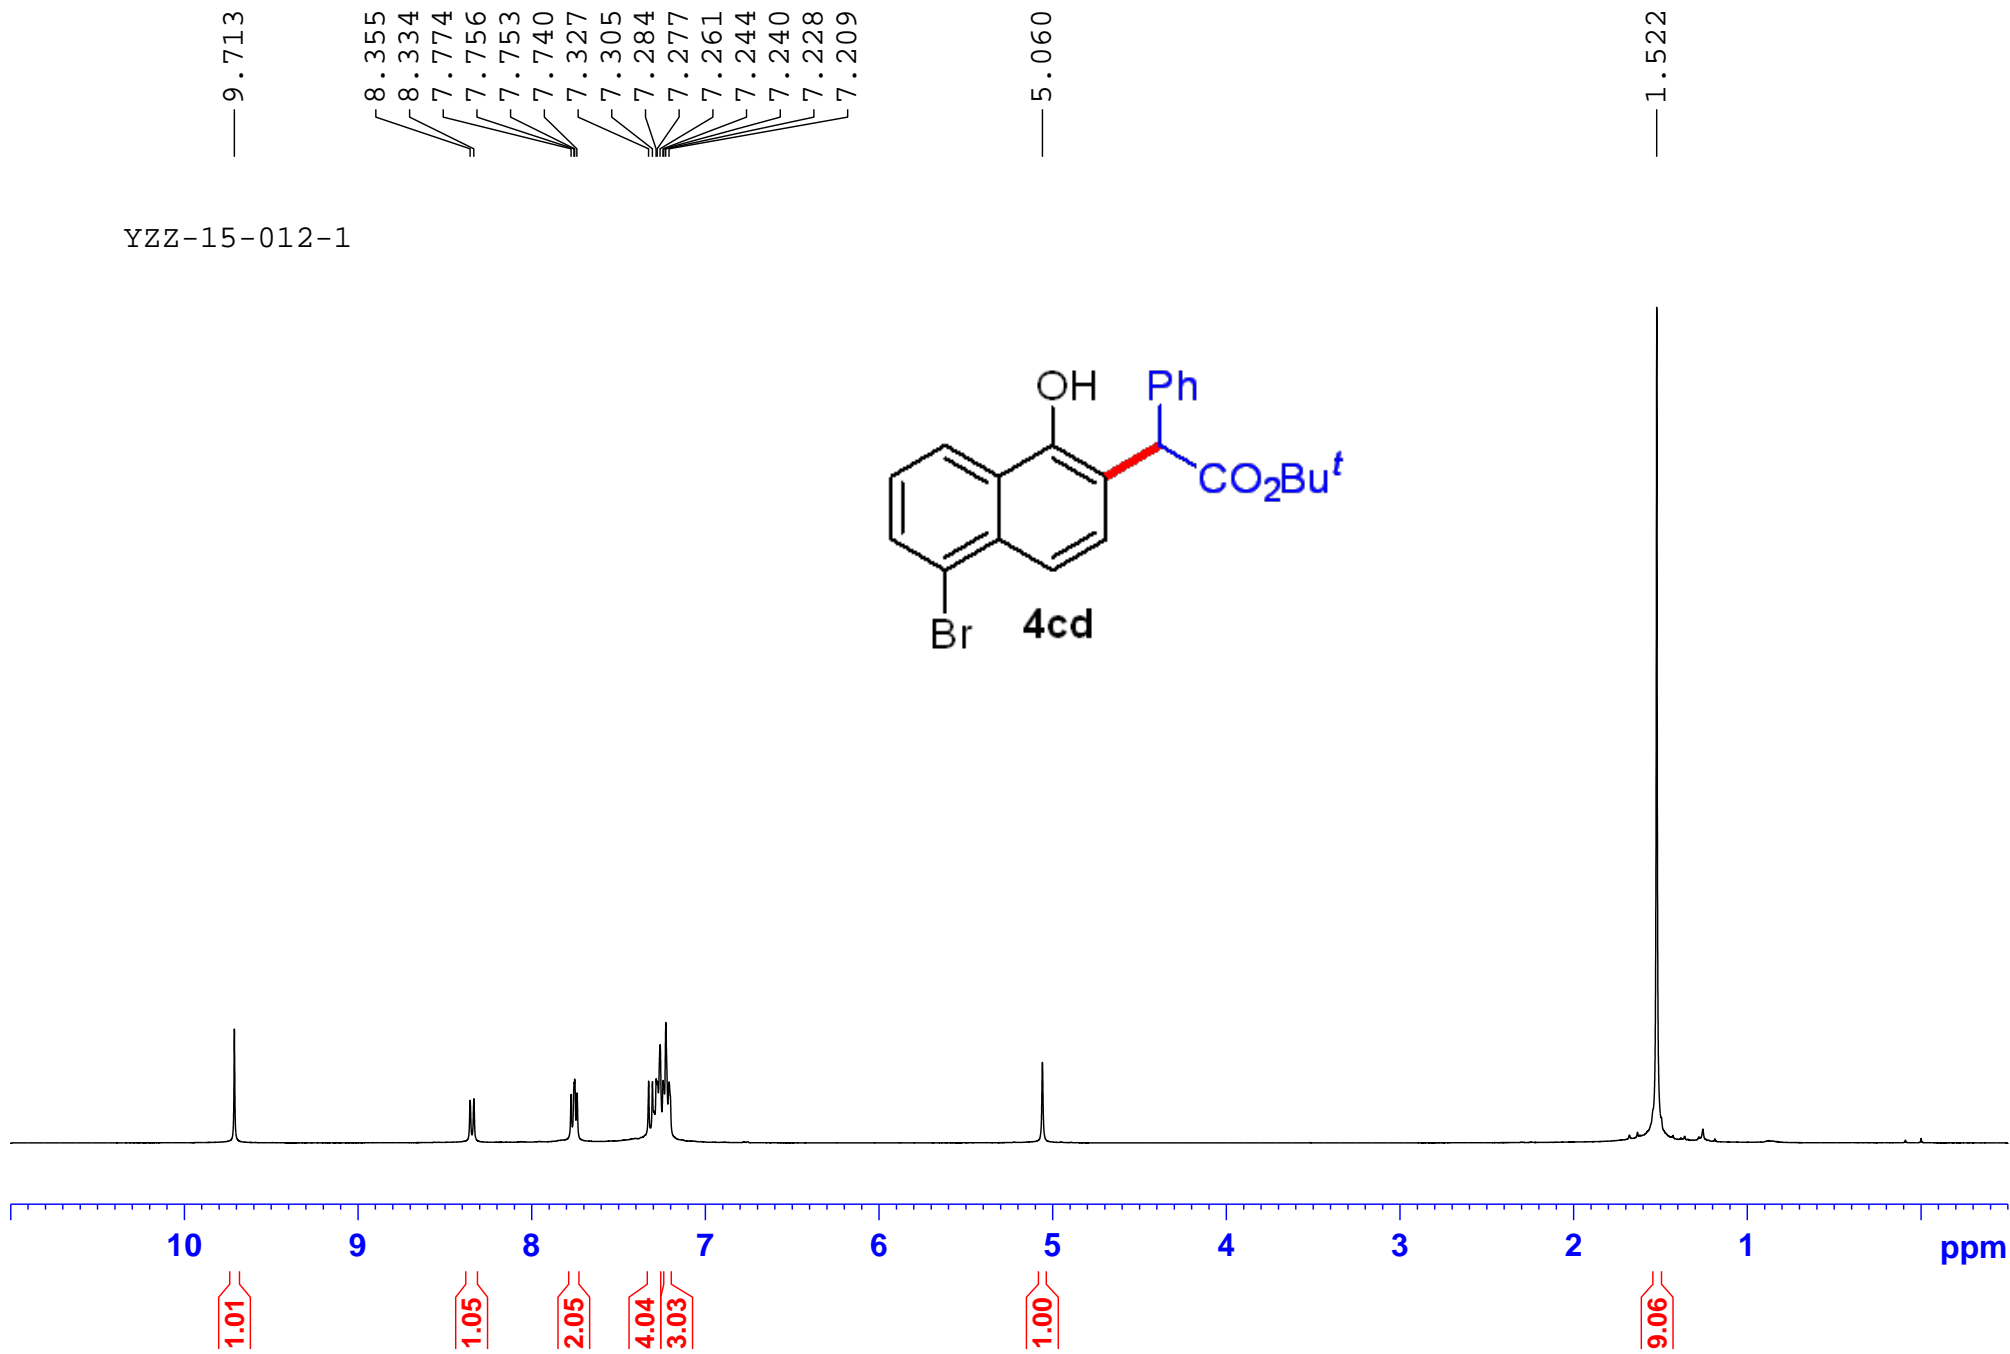

YZZ-15-012-1-C

— 175.89

151.97  
136.83  
132.95  
130.78  
130.56  
128.71  
127.91  
127.43  
127.19  
125.39  
122.93  
122.08  
119.06  
117.04

84.28  
77.32  
77.00  
76.68

— 57.65

— 27.92

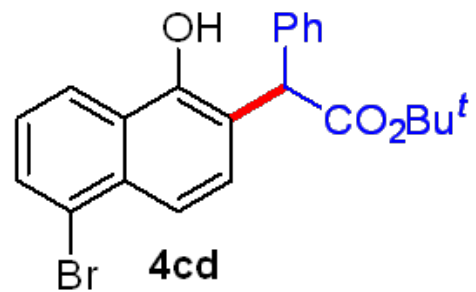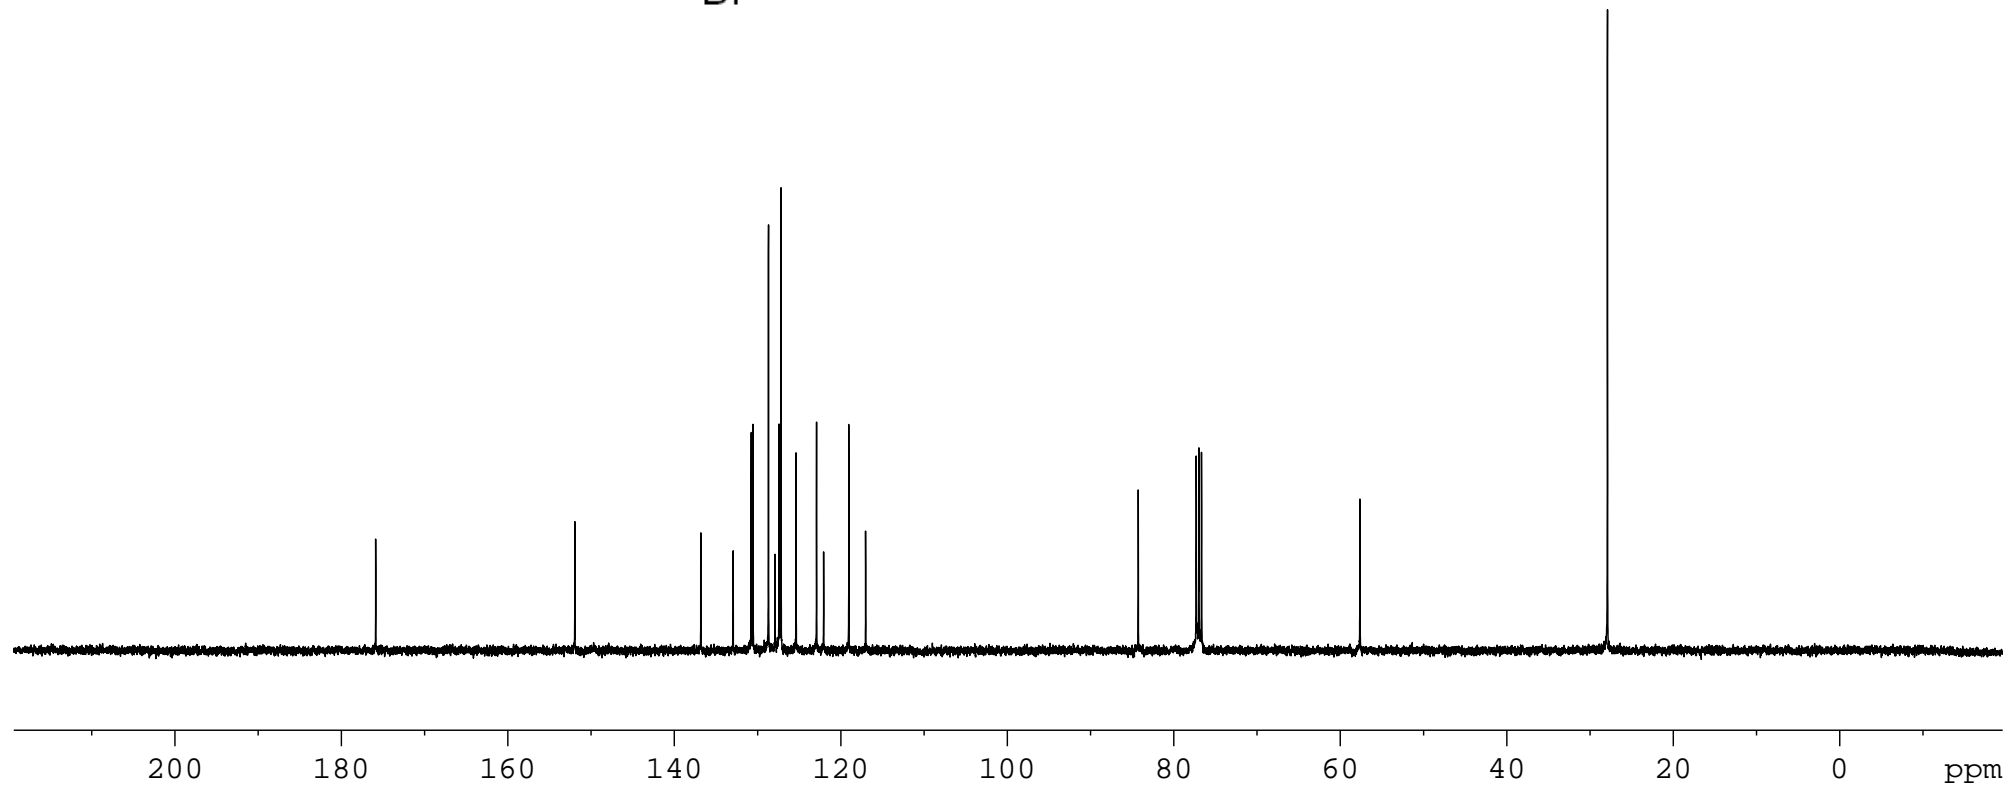



— 9.458  
yzz-15-147-1

8.310  
8.287  
7.334  
7.324  
7.310  
7.289  
7.270  
7.260  
7.227  
7.206  
7.177  
7.154  
7.115

— 5.065

— 3.937

— 1.571

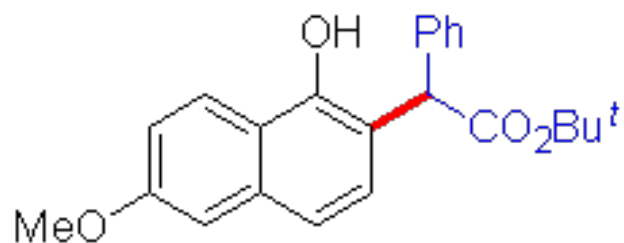

4dd

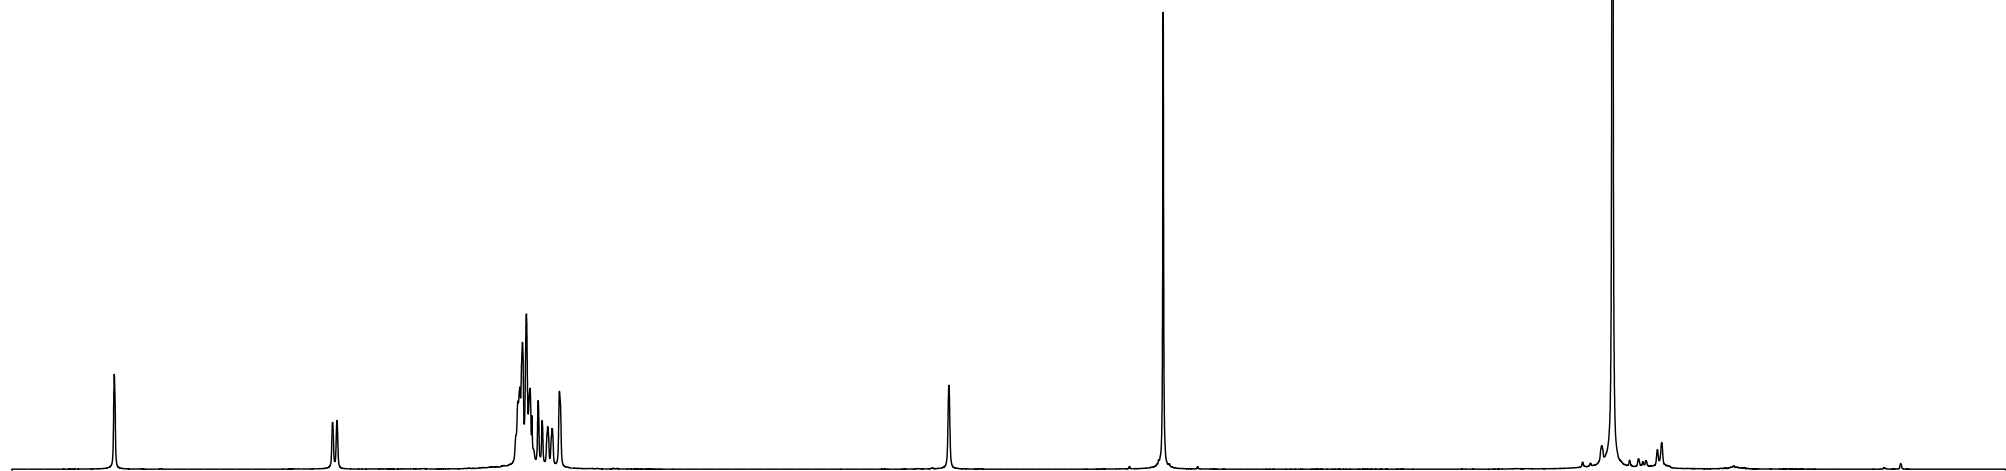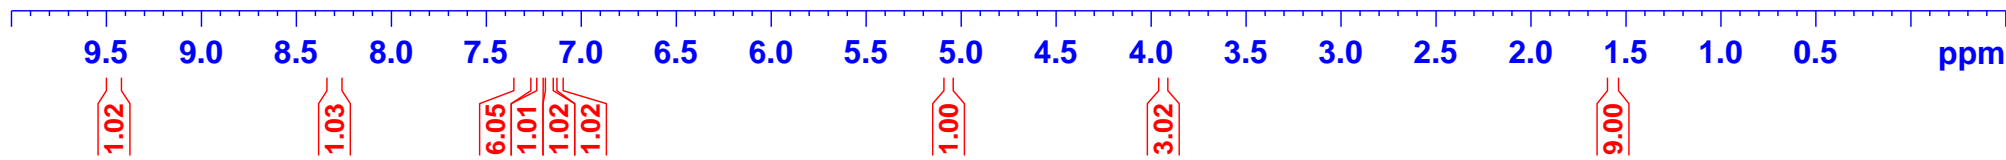

yyy-15-147-1-c

— 176.01  
— 158.31  
— 152.00  
137.36  
135.86  
130.26  
128.60  
127.26  
124.64  
121.76  
118.81  
117.65  
114.24  
105.26  
83.87  
77.32  
77.00  
76.68  
57.50  
55.24  
— 27.93

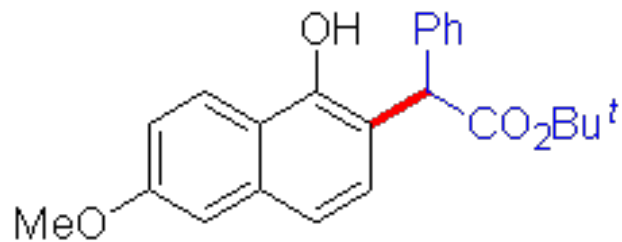

4dd

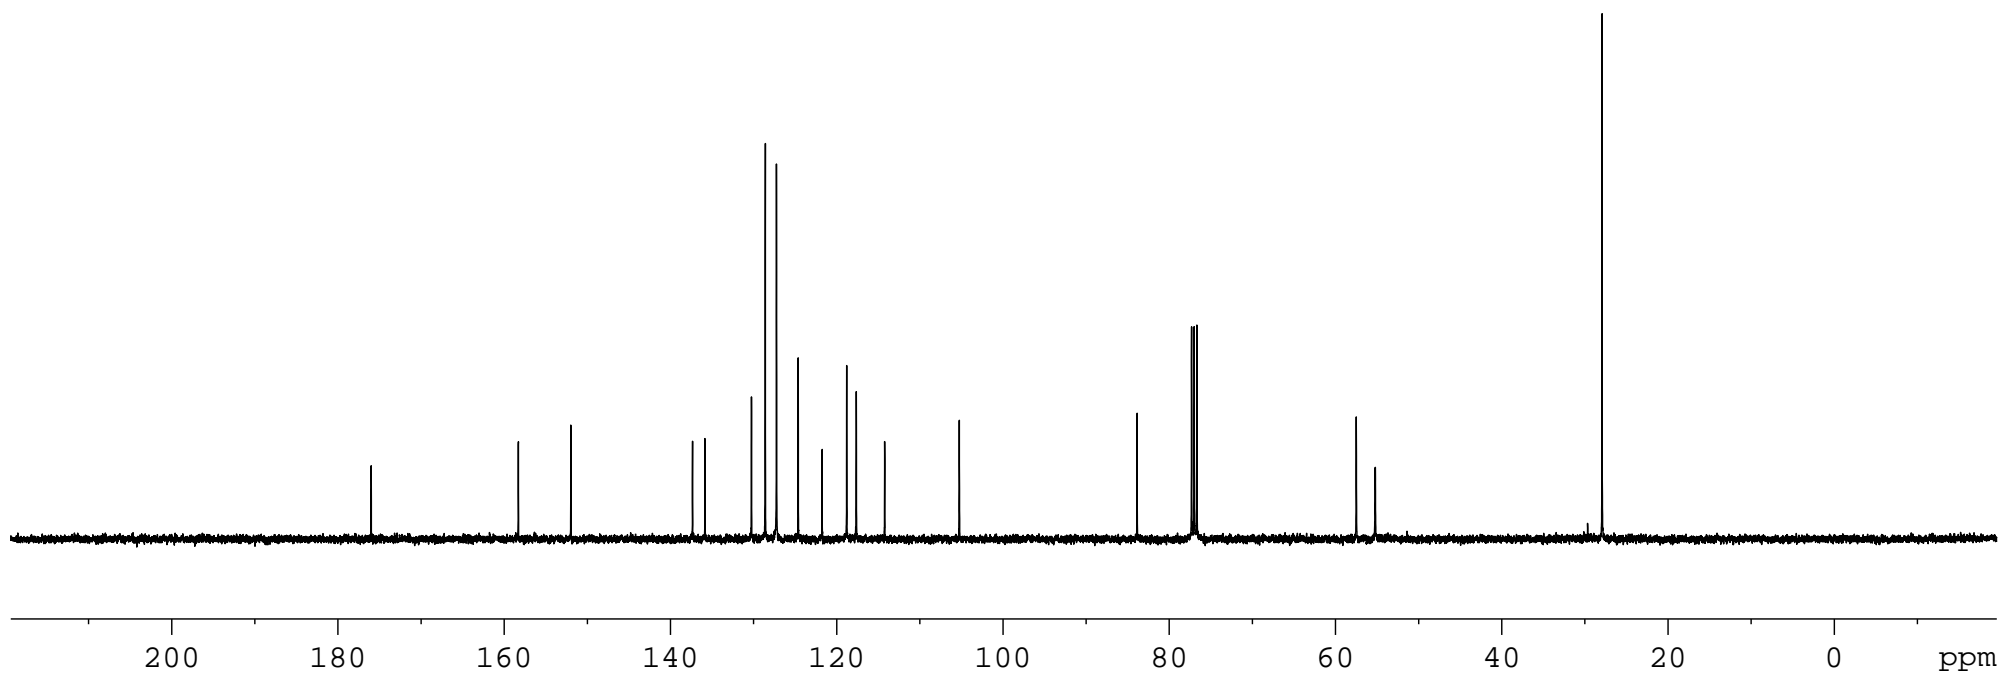

yzz-15-149-1

— 9.461

7.677  
7.655  
7.633  
7.339  
7.318  
7.300  
7.280  
7.263  
7.242  
7.224  
7.214  
7.149  
7.127  
7.090  
7.069

— 5.032

— 3.906

— 1.528

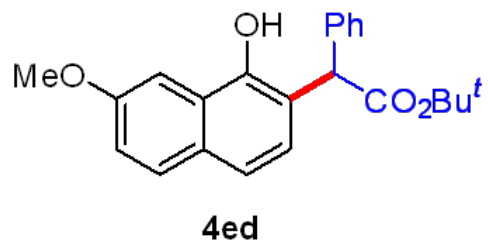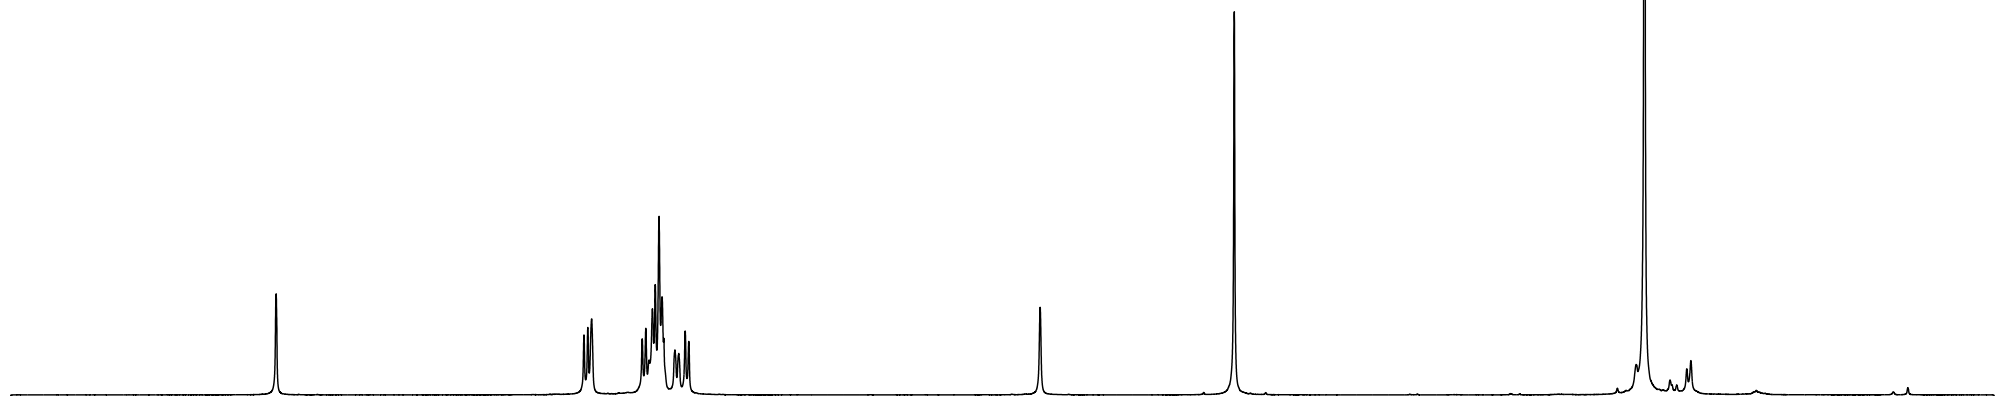

10

9

8

7

6

5

4

3

2

1

ppm

1.03

2.05

6.02

1.01

1.01

1.00

3.06

9.07

yzz-15-149-1-c

— 176.05  
— 157.45  
— 150.73  
137.22  
129.90  
128.70  
128.62  
127.52  
127.27  
127.23  
127.11  
119.75  
119.50  
116.77  
— 100.81  
83.96  
77.32  
77.00  
76.68  
57.71  
55.28  
— 27.94

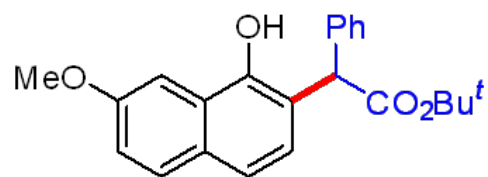

4ed

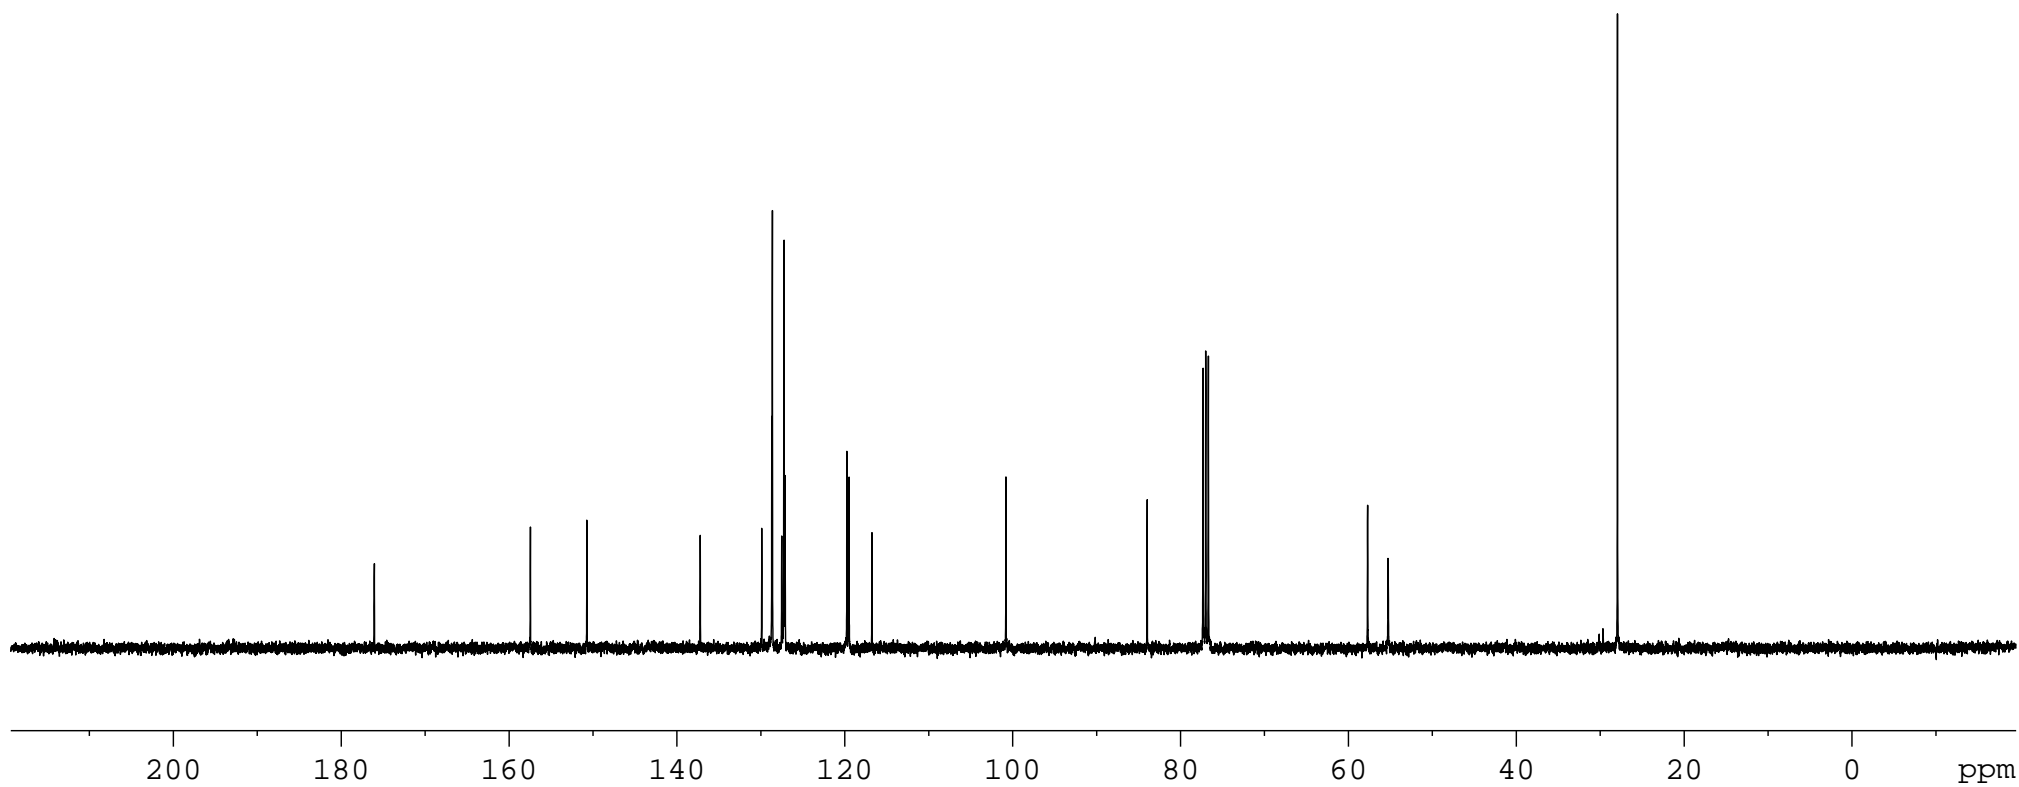

yzz-15-148-1

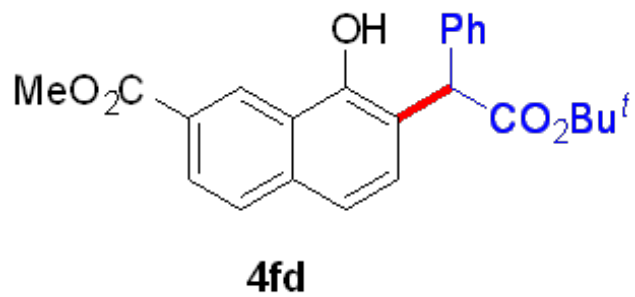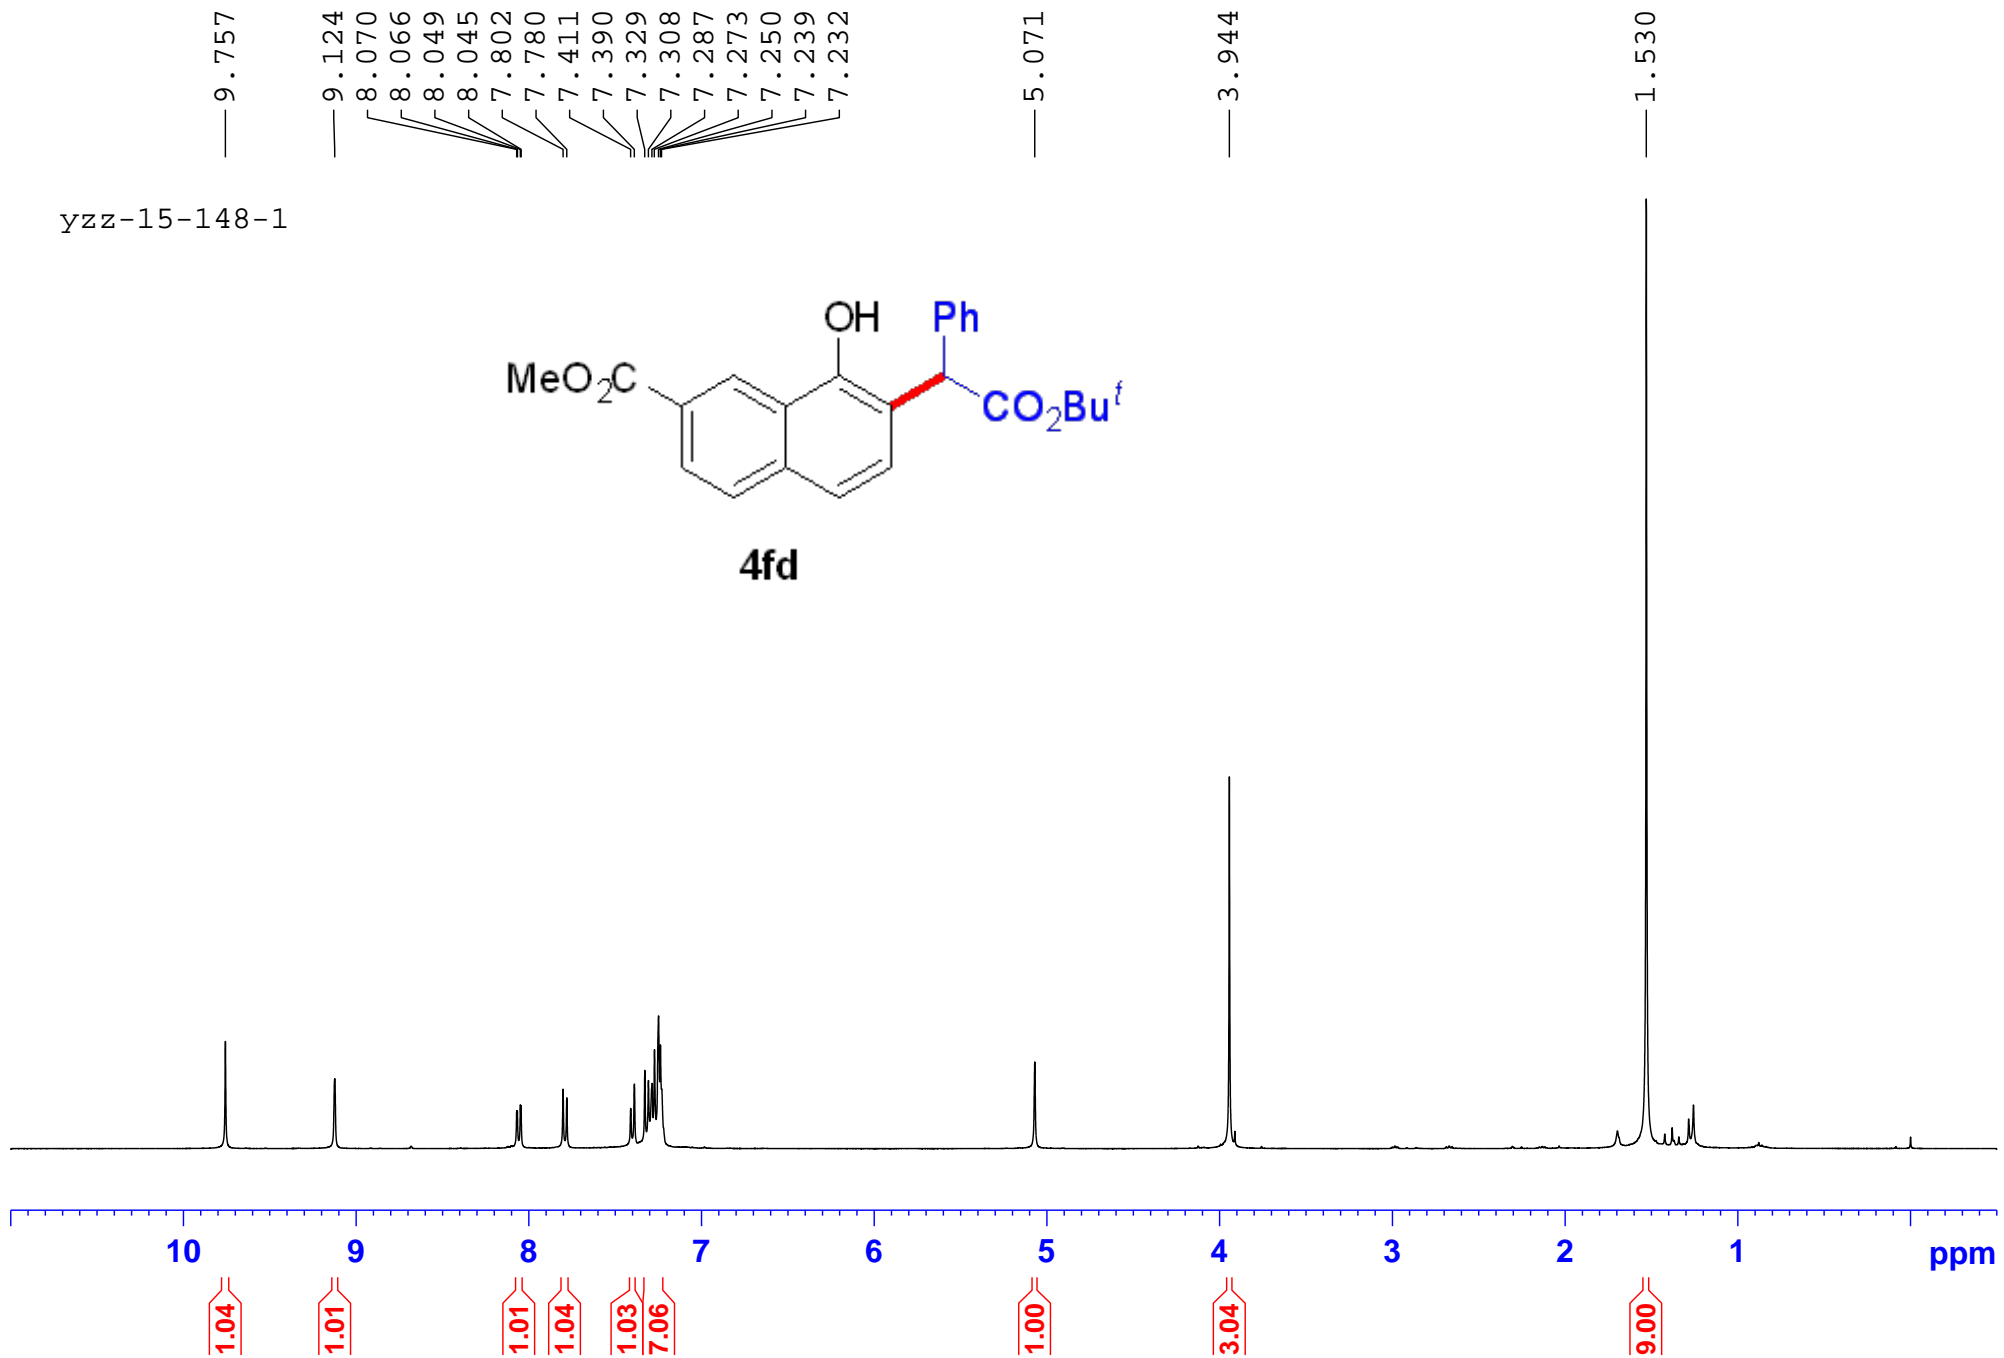

yyy-15-148-1-c

- 175.72
- 167.37
- 152.99
- 136.89
- 136.41
- 132.05
- 128.70
- 127.42
- 127.37
- 127.26
- 126.68
- 126.34
- 125.94
- 125.70
- 119.61
- 117.10
- 84.21
- 77.32
- 77.20
- 77.00
- 76.68
- 57.52
- 52.04
- 27.90

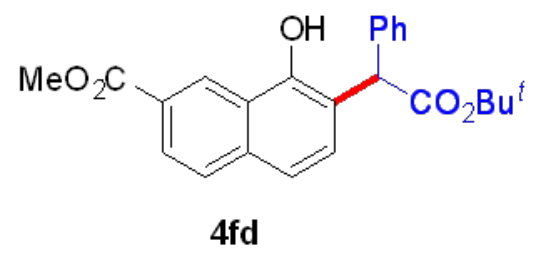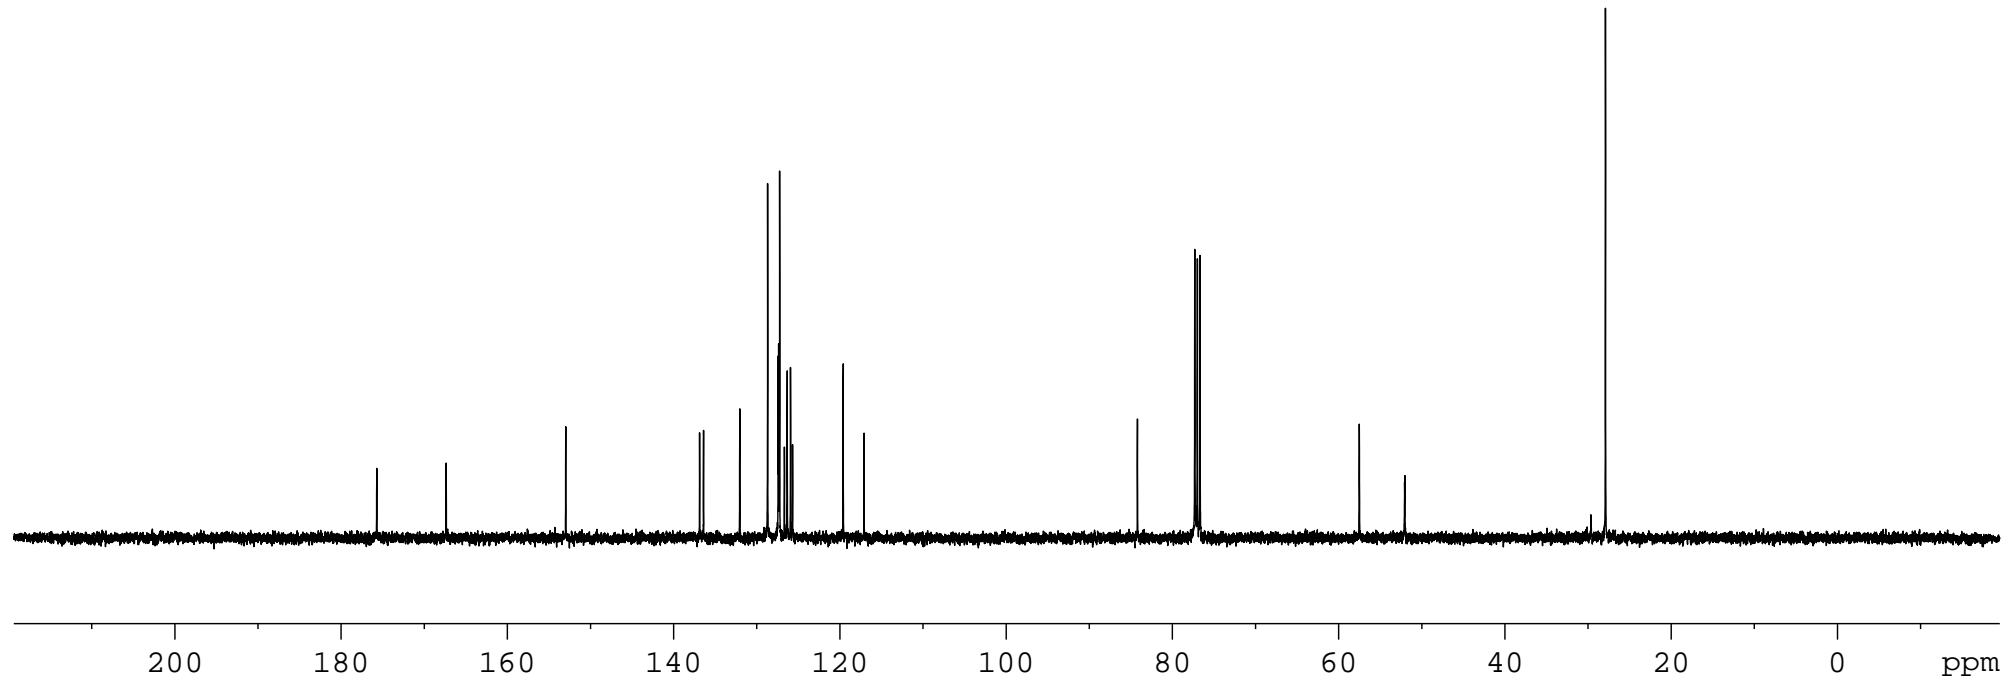

yzz-15-150-1

— 9.568

8.434  
7.543  
7.521  
7.452  
7.448  
7.431  
7.426  
7.263  
7.242  
7.220  
7.203  
7.184  
7.167  
7.165  
7.142  
7.126  
7.118

— 4.948

— 1.444

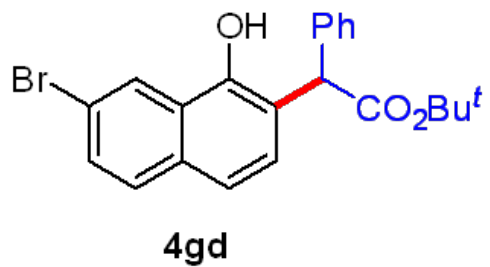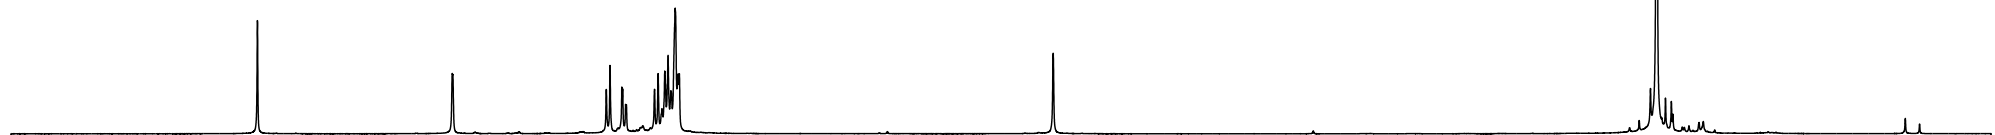

10

9

8

7

6

5

4

3

2

1

ppm

1.03

1.03

1.07

1.06

1.10

6.05

1.00

8.99

yzz-15-150-1-c

— 175.85

151.05  
136.86  
132.78  
129.96  
129.86  
128.77  
128.71  
127.71  
127.43  
127.20  
125.48  
119.74  
119.37  
117.16

84.27  
77.32  
77.00  
76.68

— 57.73

— 27.92

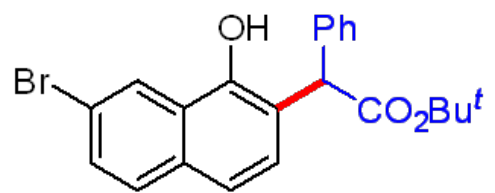

4gd

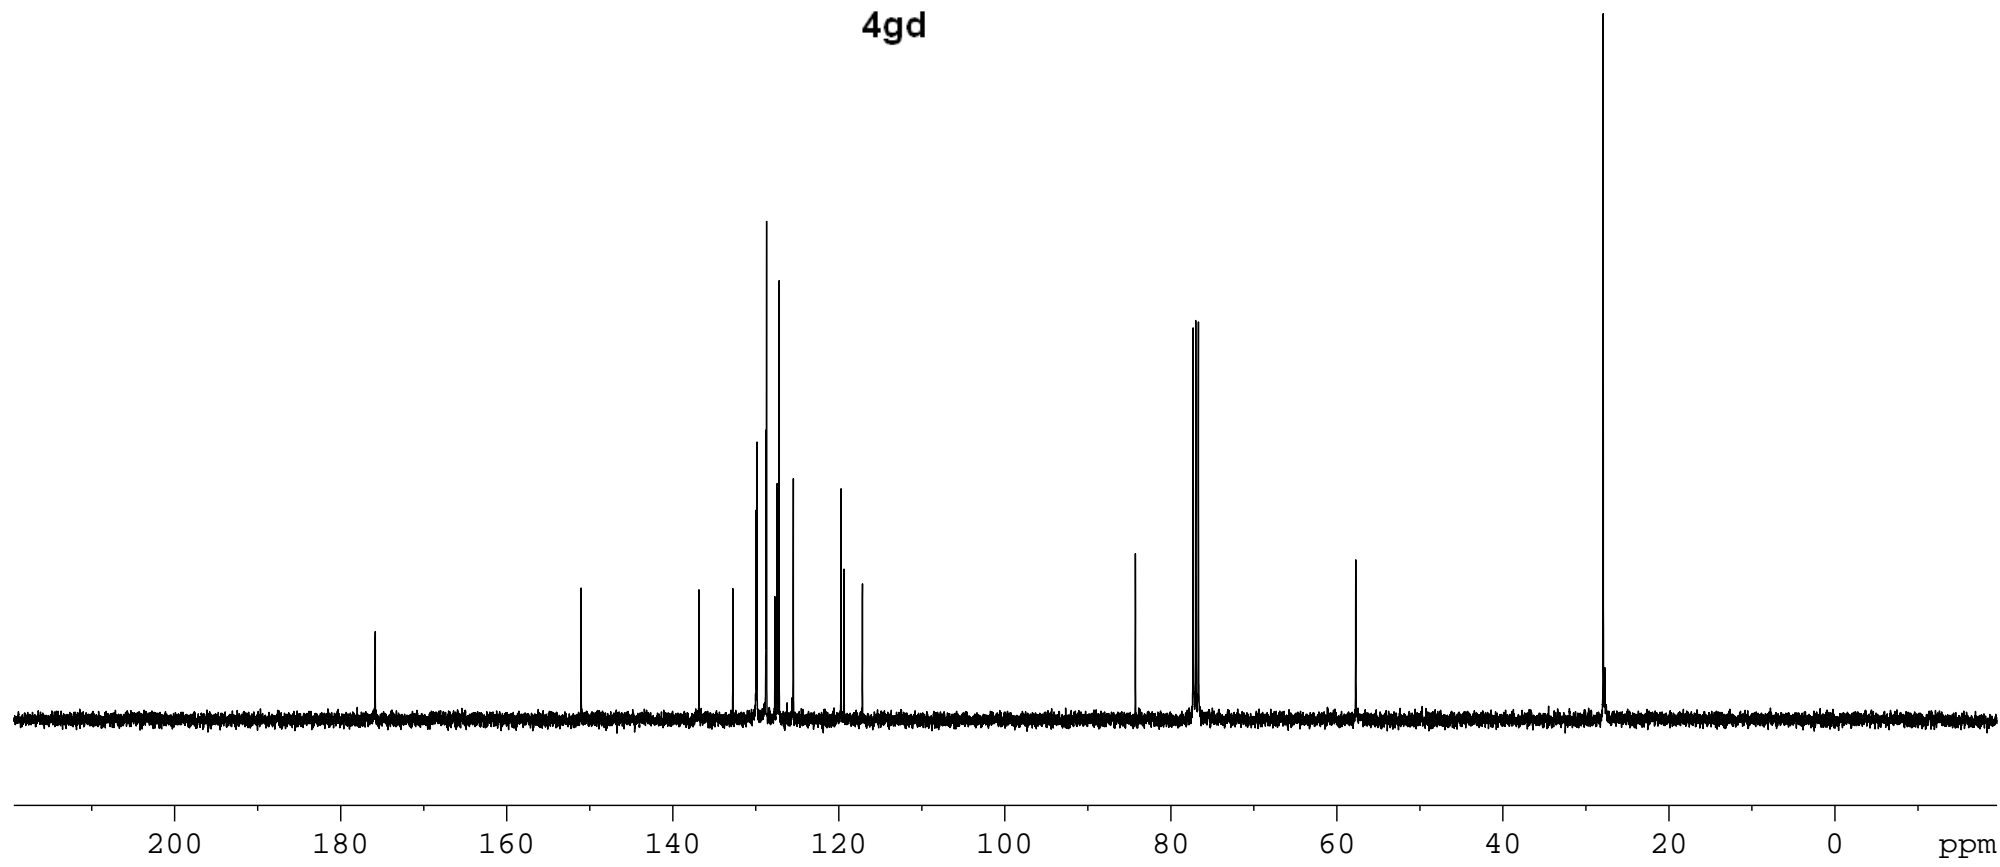



yzz-16-002-1

10.971

9.809

7.322  
7.301  
7.285  
7.273  
7.264  
7.254  
7.235  
7.217  
7.125  
7.104  
6.782  
6.778  
6.765  
6.761

5.081

1.538

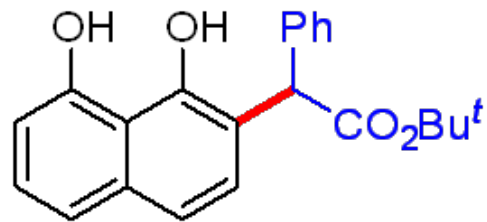

4hd

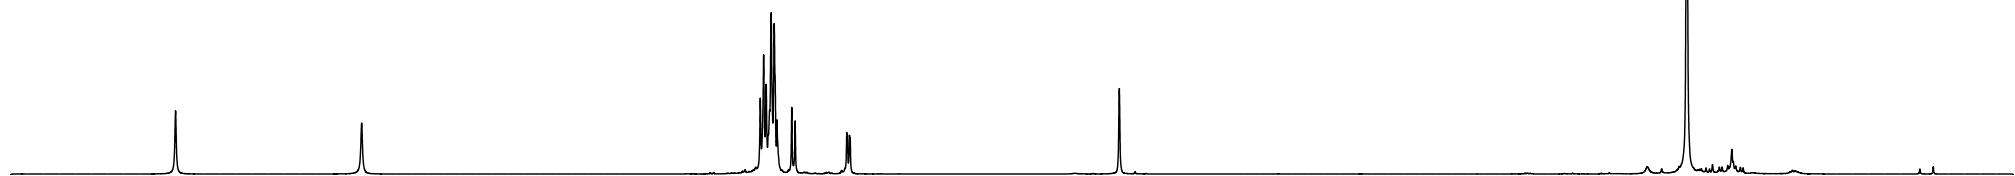

11  
1.02

10  
1.02

8.07  
1.04  
1.02

5  
1.00

1.538  
9.07

ppm

yyy-16-002-1-c

— 176.72

— 154.84

— 152.06

— 136.97

— 136.57

— 129.09

— 128.66

— 127.50

— 127.38

— 127.35

— 120.72

— 118.77

— 116.68

— 115.96

— 109.87

— 84.46

— 77.32

— 77.00

— 76.68

— 56.74

— 27.92

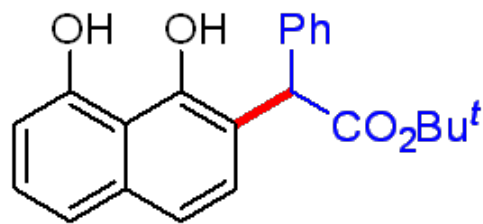

4hd

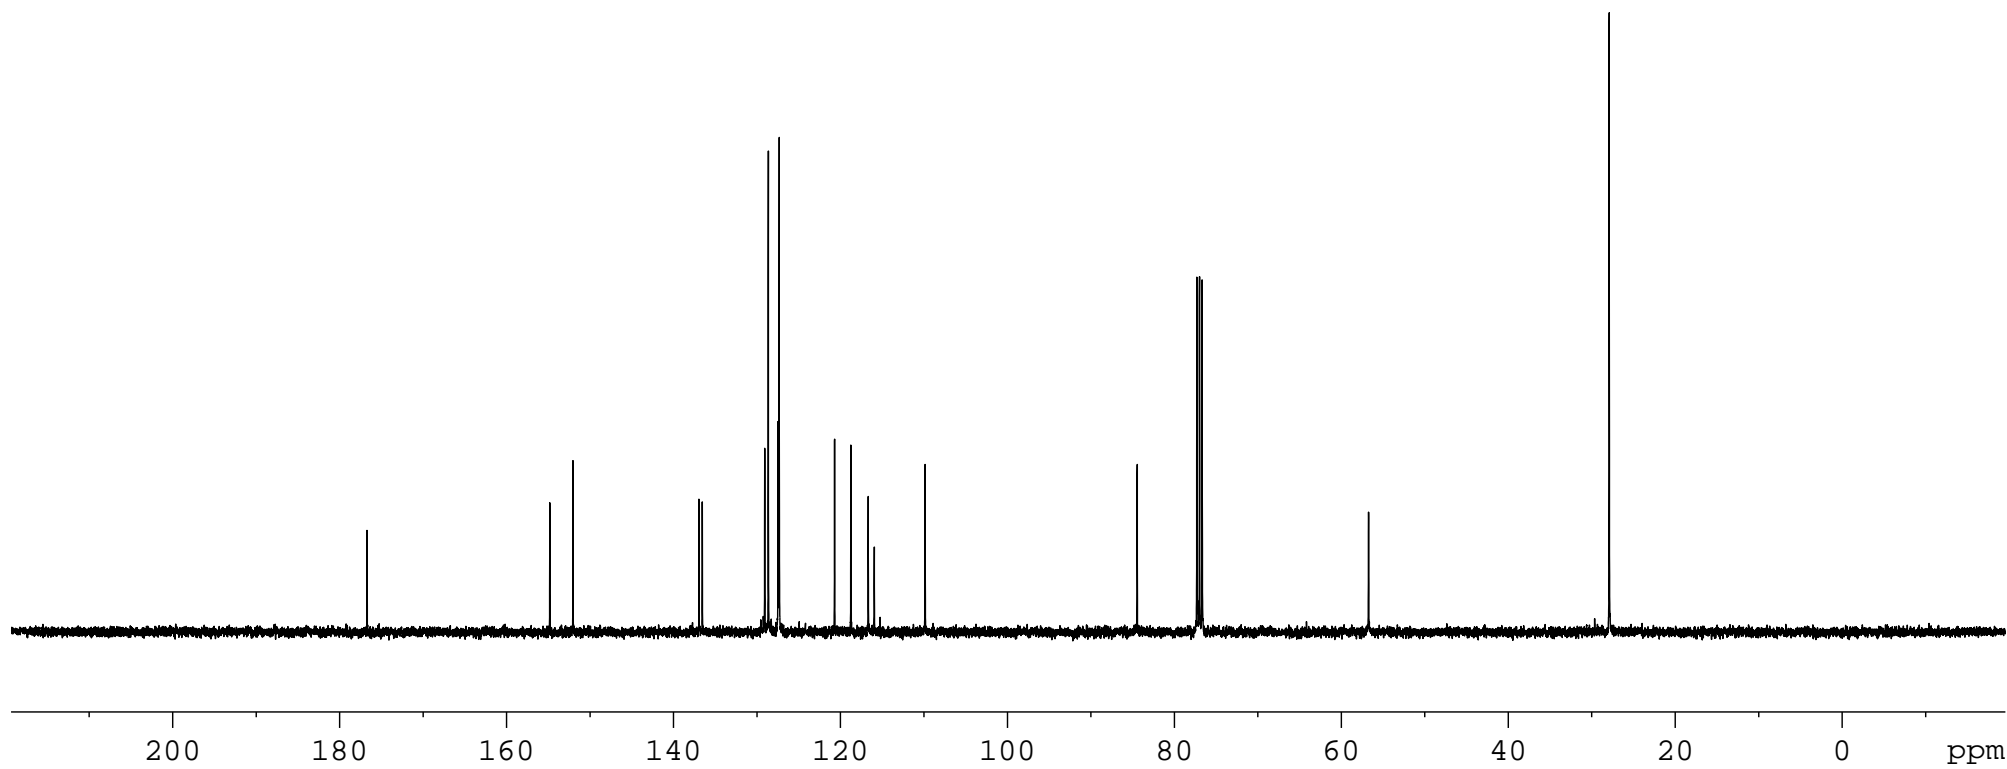

yzz-15-060-2

8.454  
8.024  
8.003  
7.813  
7.793  
7.760  
7.738  
7.508  
7.490  
7.470  
7.363  
7.344  
7.326  
7.264  
7.247  
7.215  
7.198  
7.180  
7.157  
5.990

4.384  
4.366  
4.357  
4.339  
4.254  
4.237  
4.228  
4.219  
4.210

1.313  
1.295  
1.277

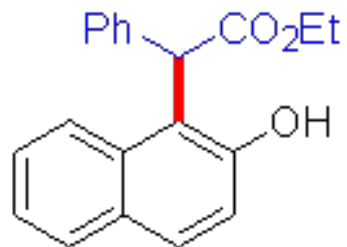

7a

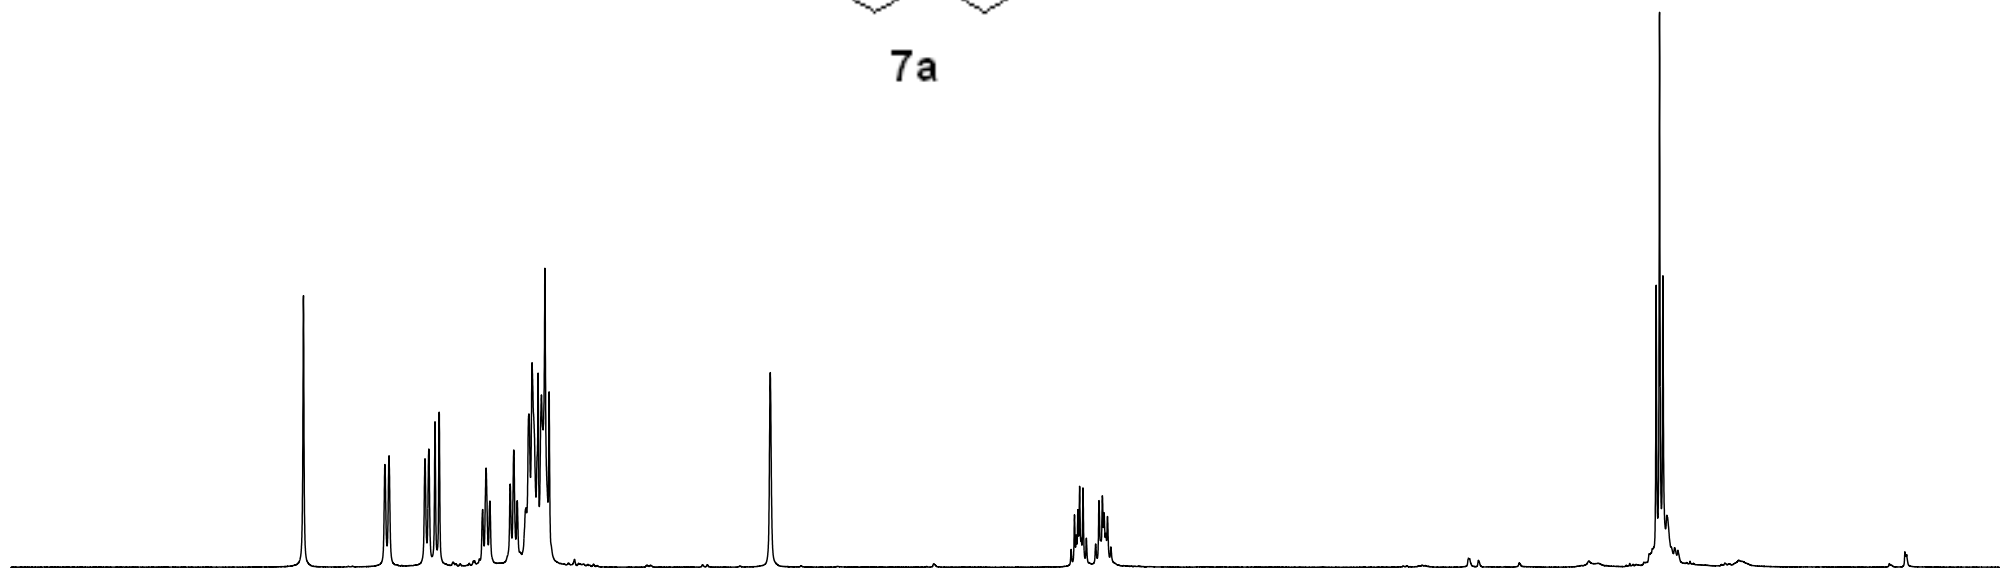

9

8

7

6

5

4

3

2

1

0 ppm

1.01

1.01

1.02

1.02

1.03

1.20

6.05

1.00

1.02

1.07

3.06

yzz-15-060-2-c

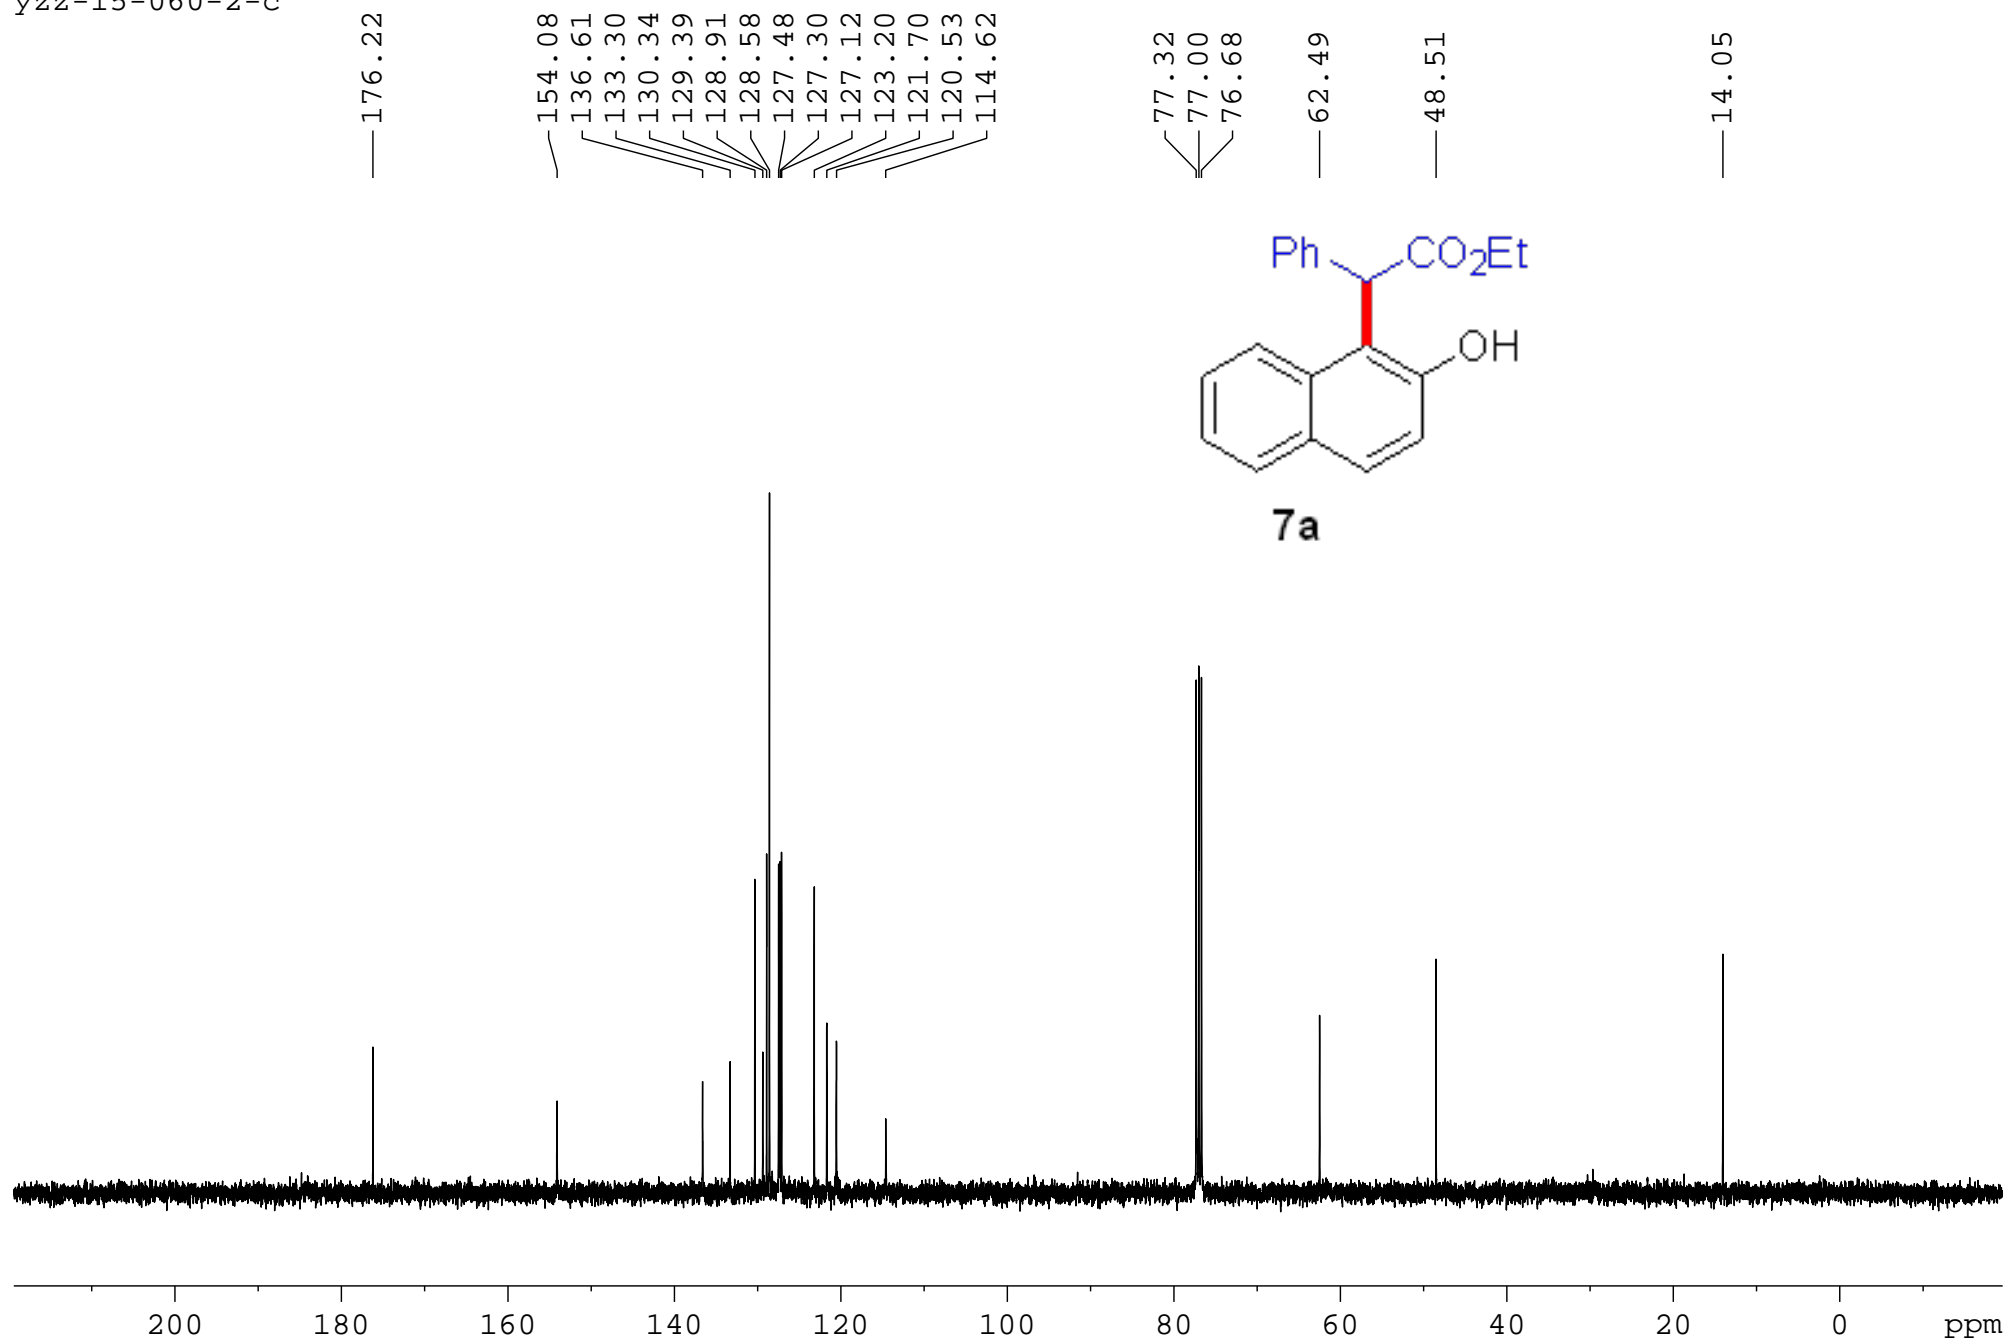

8.030N  
 8.0081  
 7.8185  
 7.7980  
 7.7681  
 7.7452  
 7.514  
 7.511  
 7.497  
 7.493  
 7.475  
 7.473  
 7.365  
 7.347  
 7.329  
 7.289  
 7.284  
 7.280  
 7.268  
 7.249  
 7.239  
 7.222  
 7.216  
 7.196  
 7.188  
 7.174  
 5.963  
 5.200  
 5.185  
 5.169  
 5.154  
 5.138

1.379  
 1.364  
 1.213  
 1.197

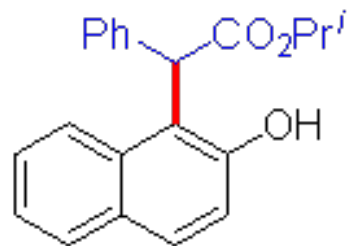

7b

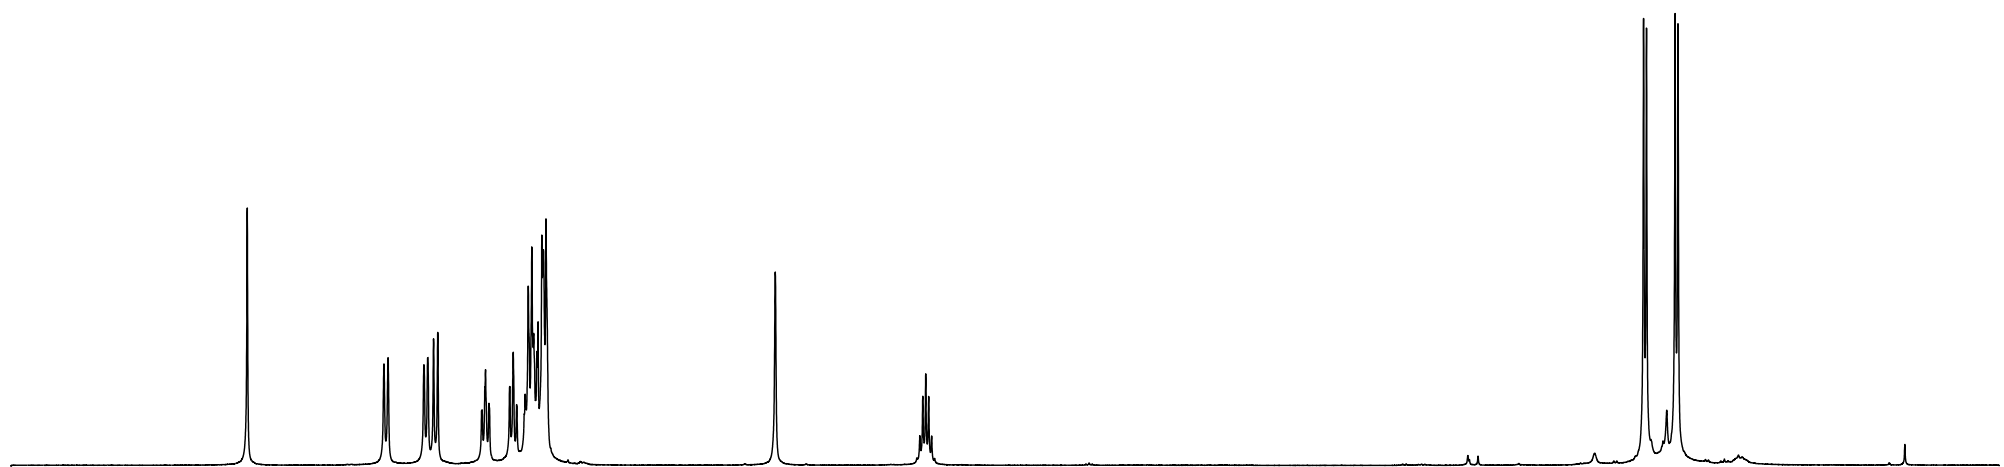

9

8

7

6

5

4

3

2

1

0 ppm

1.01

1.06

1.04

1.02

1.06

1.03

6.06

1.00

1.01

3.01

3.02

yzz-15-061-2-c

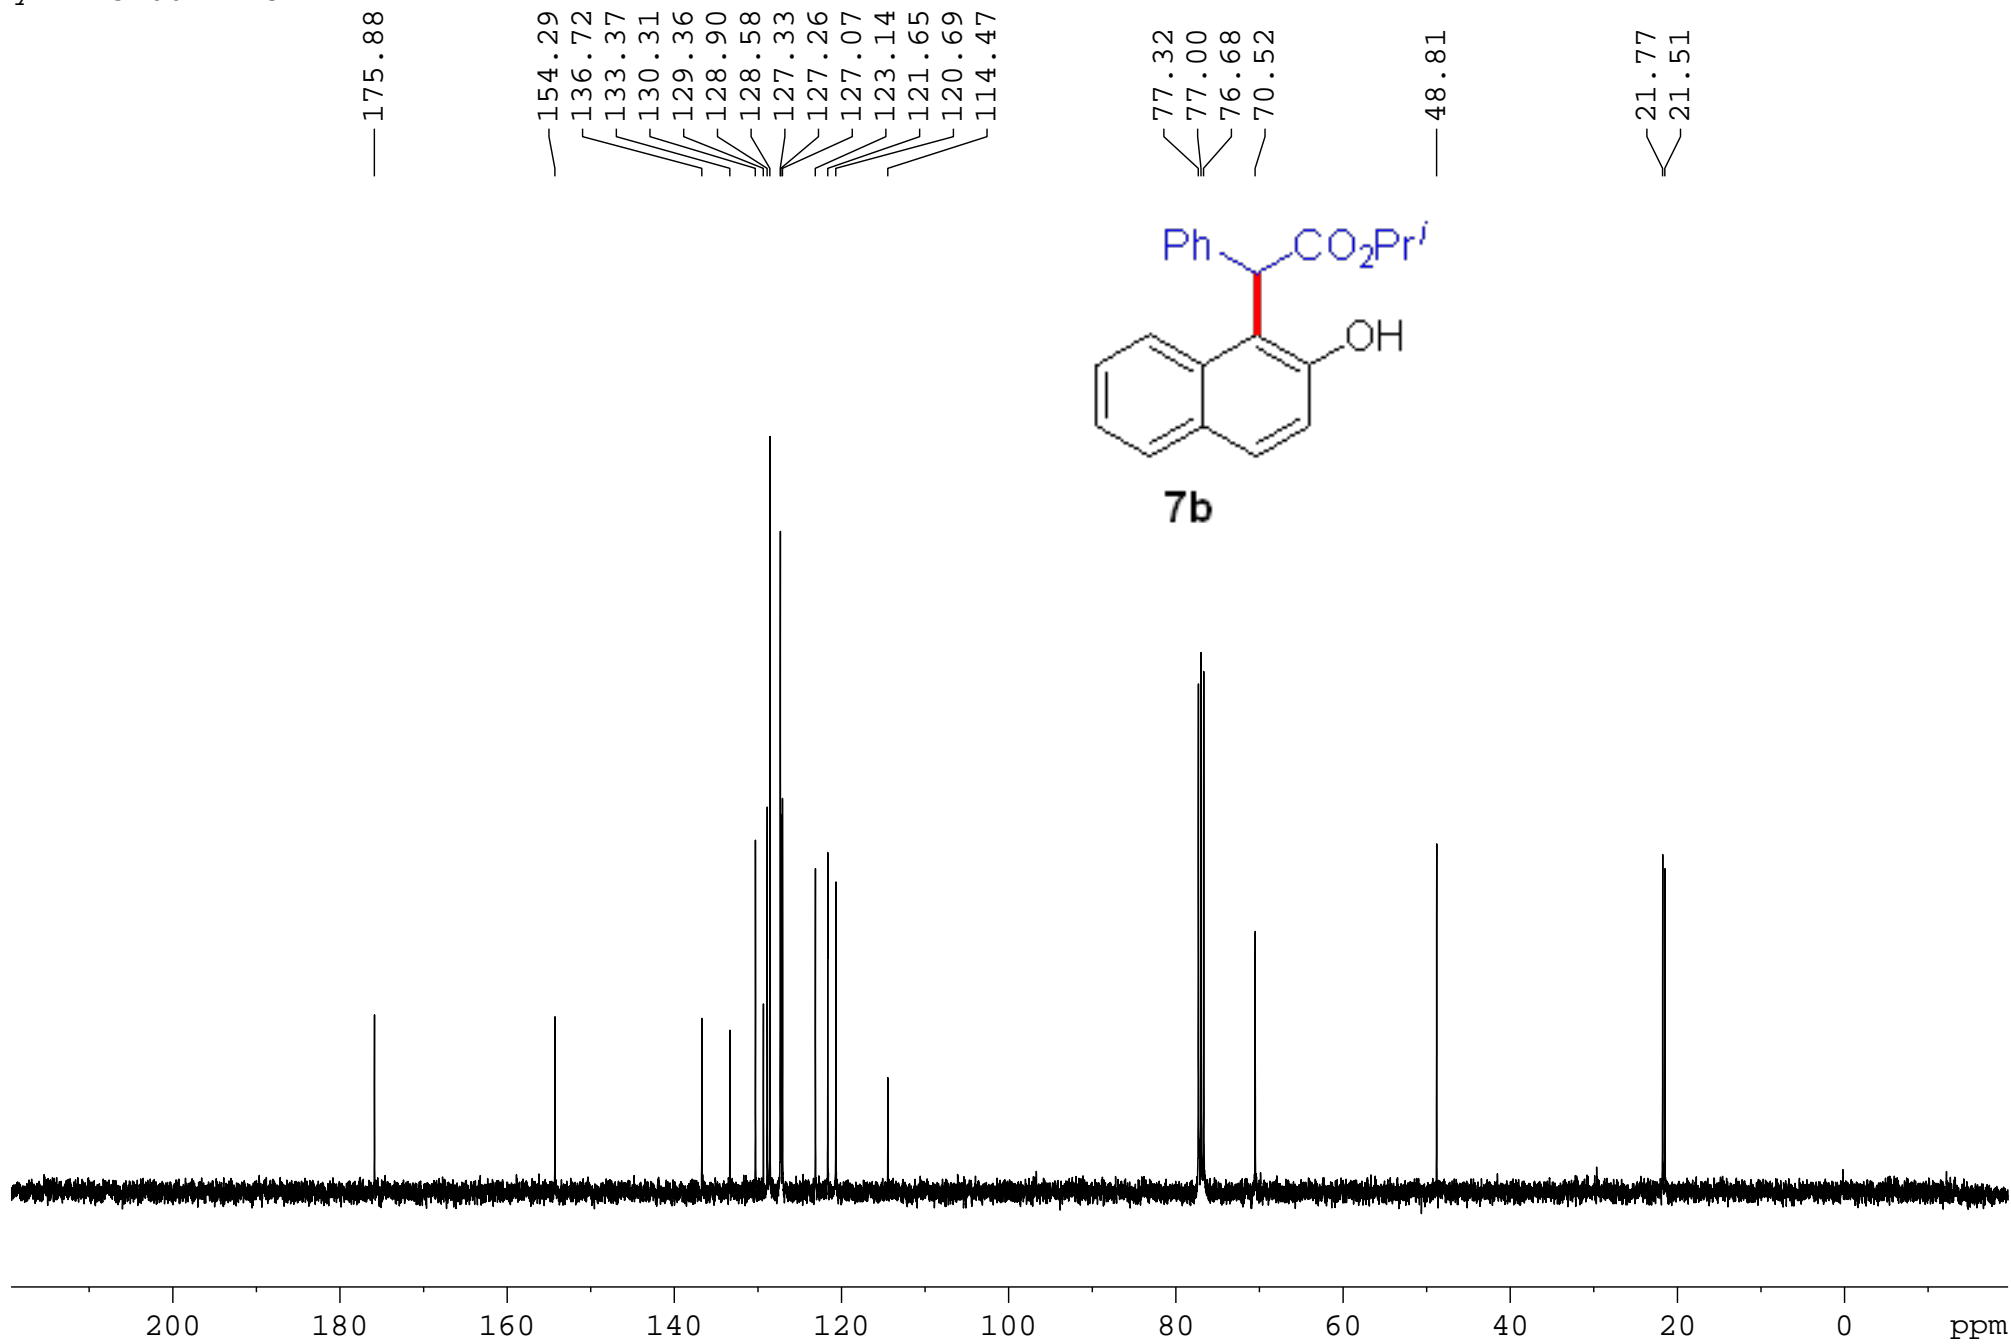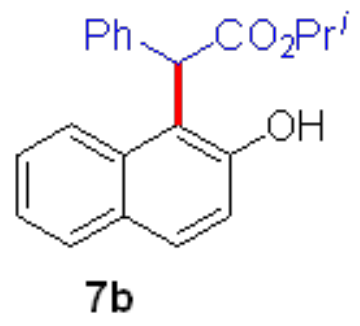

yzz-15-063-2

8.7950  
8.0655  
8.0433  
7.849  
7.830  
7.799  
7.777  
7.546  
7.544  
7.526  
7.508  
7.505  
7.397  
7.379  
7.361  
7.260  
7.232  
7.210  
7.103  
5.960  
5.228  
5.212  
5.197  
5.181  
5.165

2.315

1.411  
1.395  
1.248  
1.233

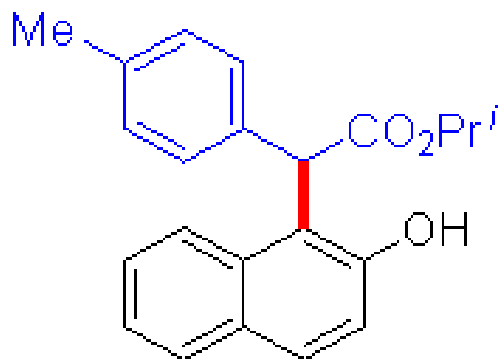

7c

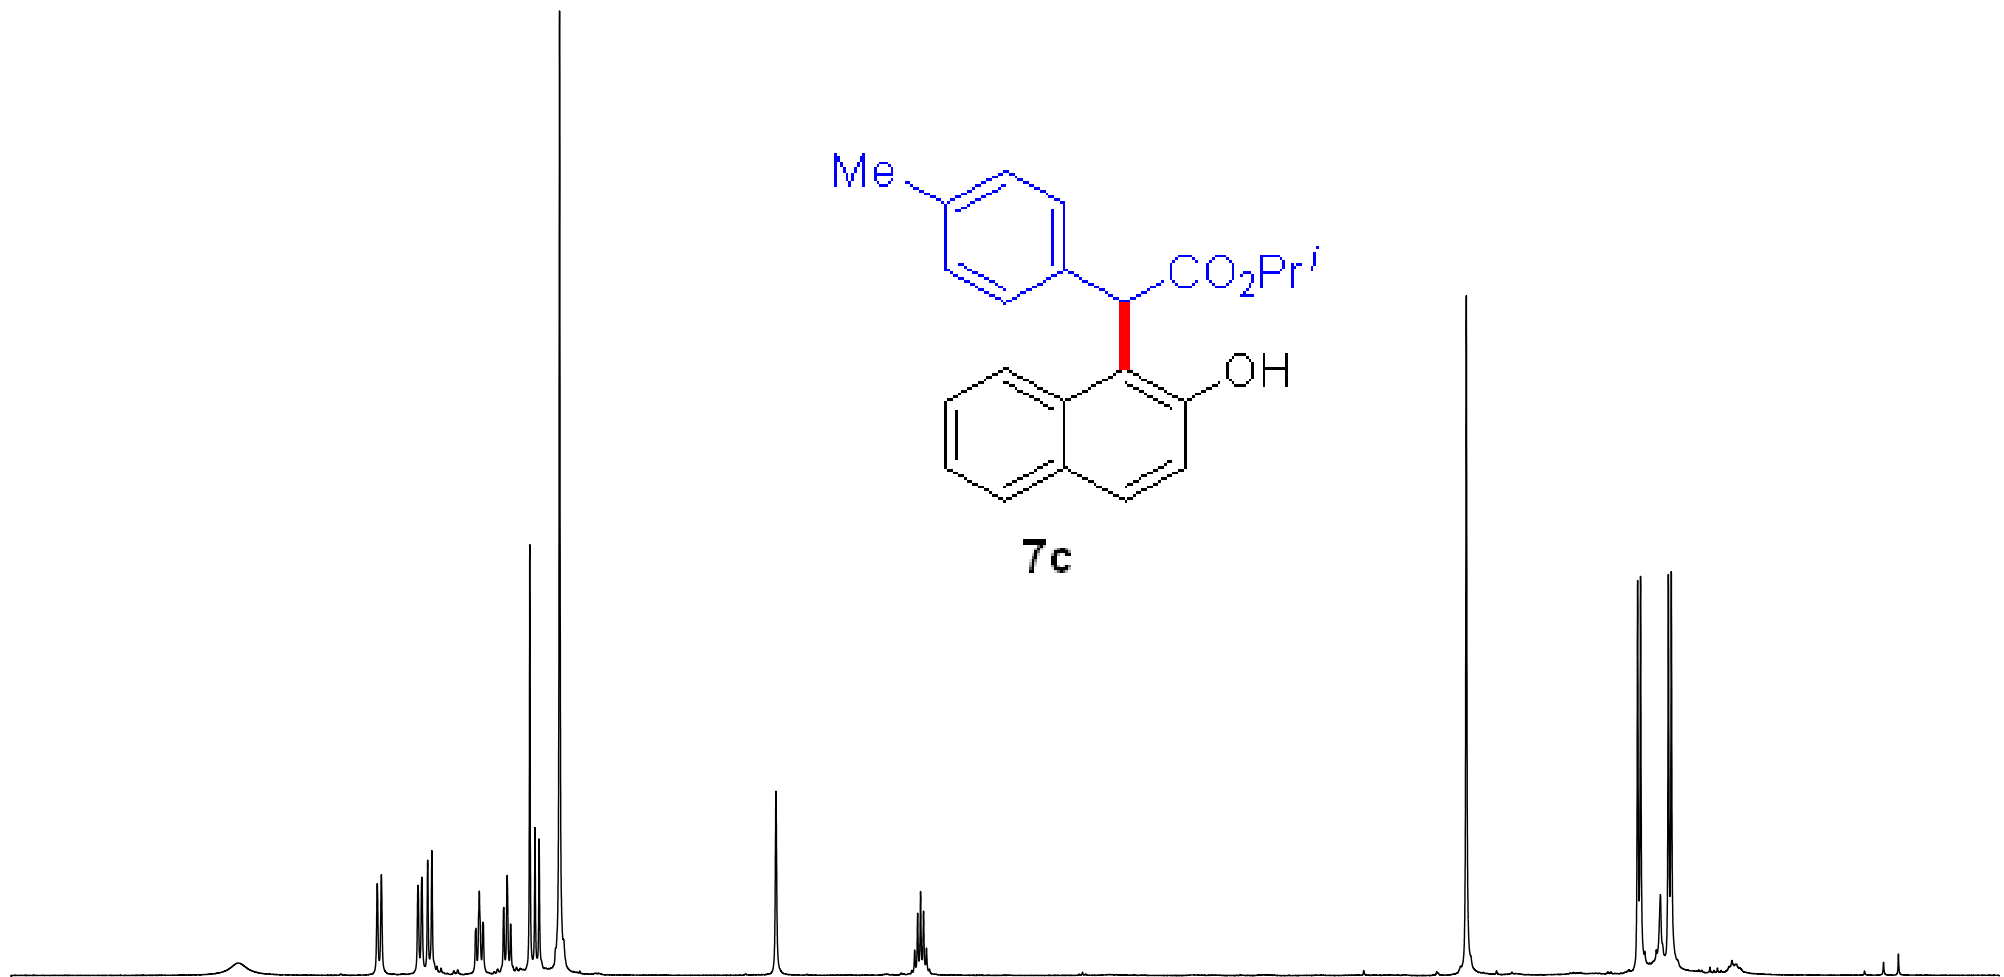

9

8

7

6

5

4

3

2

1

0 ppm

0.86

1.04

1.02

1.03

1.02

1.04

1.03

4.03

1.00

1.03

3.02

3.05

3.03

yzz-15-063-2-c

— 176.03

154.33  
136.94  
133.66  
133.39  
130.24  
129.36  
129.32  
128.89  
127.18  
127.04  
123.10  
121.66  
120.76  
114.57

77.32  
77.00  
76.68  
70.46

— 48.52

21.78  
21.52  
20.98

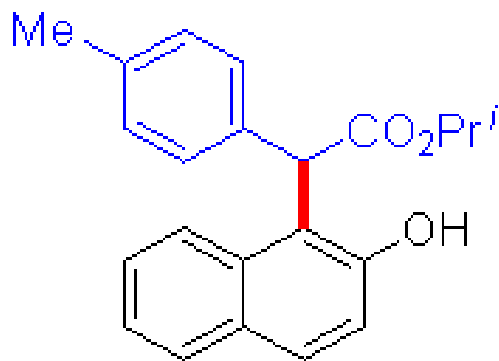

7c

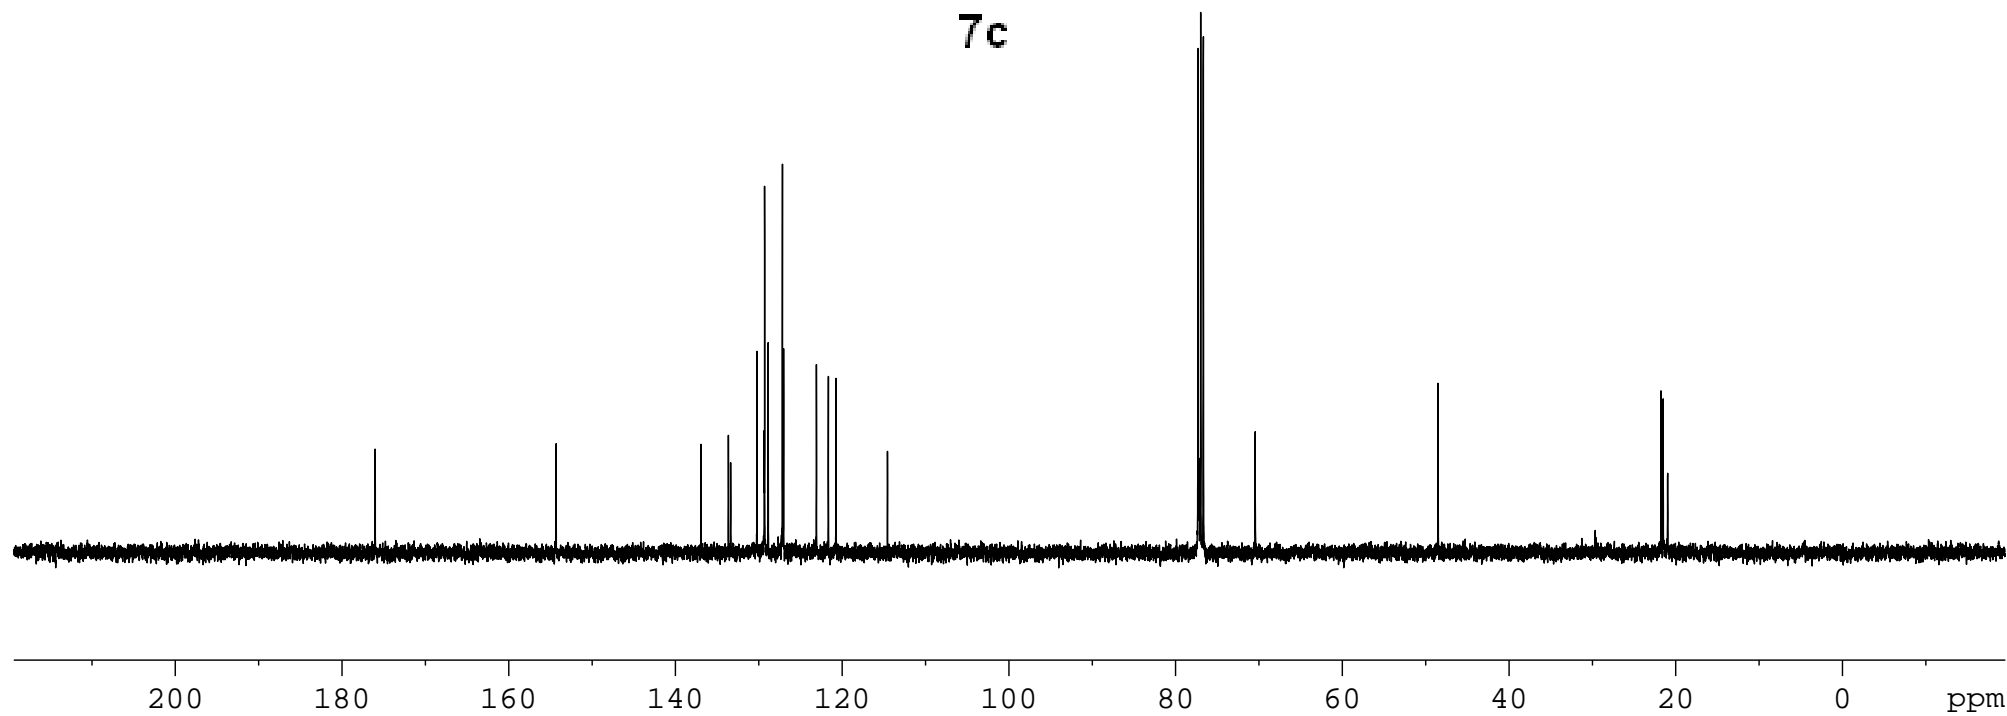



YZZ-15-064-2

8.490  
7.976  
7.954  
7.818  
7.798  
7.761  
7.739  
7.514  
7.512  
7.494  
7.476  
7.473  
7.371  
7.353  
7.334  
7.237  
7.232  
7.227  
7.216  
7.166  
7.144  
7.129  
7.108  
5.880  
5.189  
5.174  
5.158  
5.142  
5.127

1.361  
1.345  
1.196  
1.181

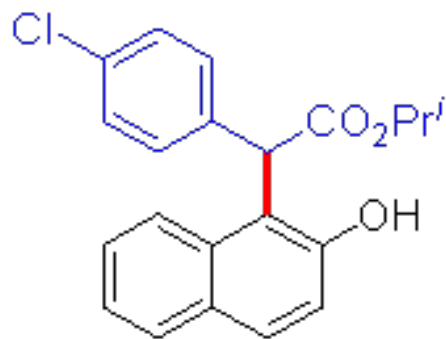

7d

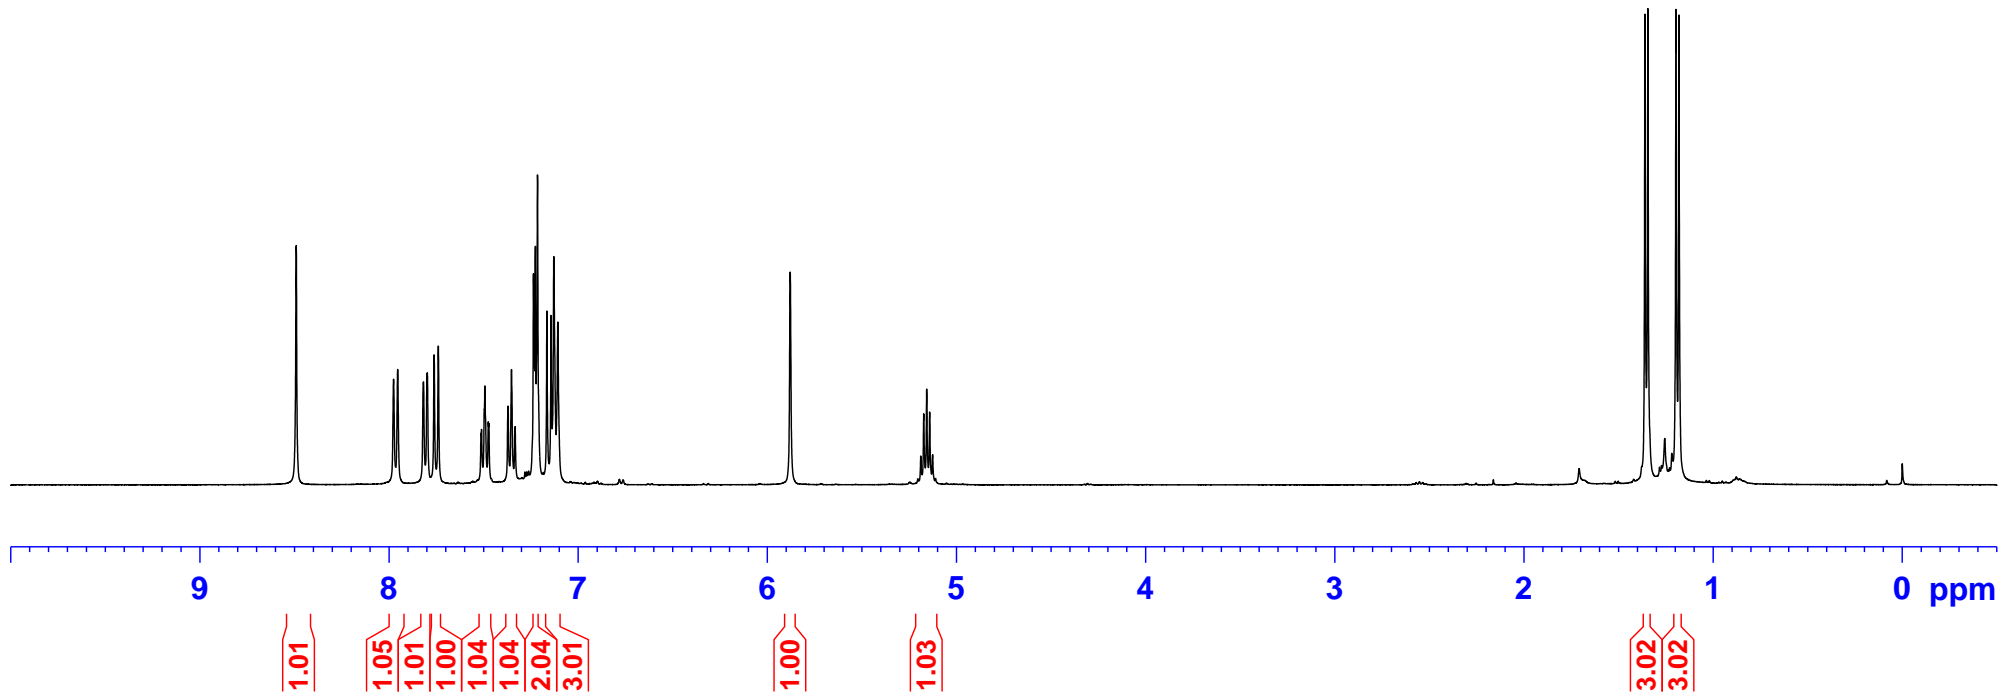

yyy-15-064-2-c

— 175.42

— 153.94

135.37  
133.18  
133.10  
130.47  
129.41  
128.96  
128.68  
127.19  
123.28  
121.60  
120.45  
114.47

77.32  
77.00  
76.69  
70.65

— 48.25

21.75  
21.47

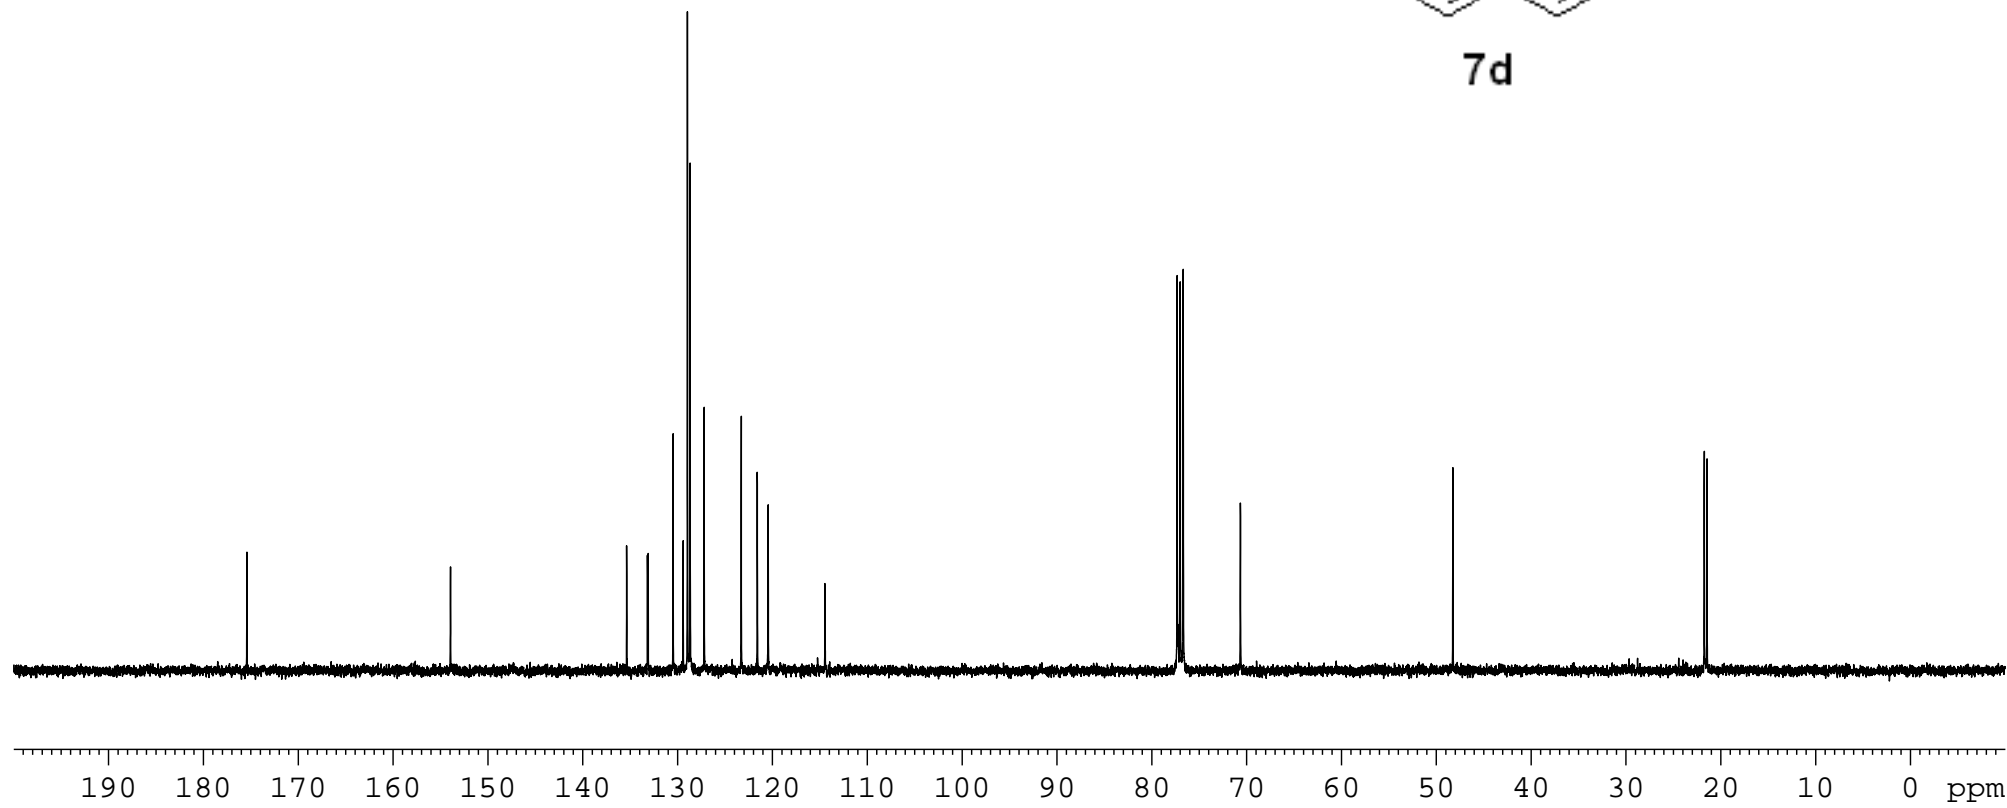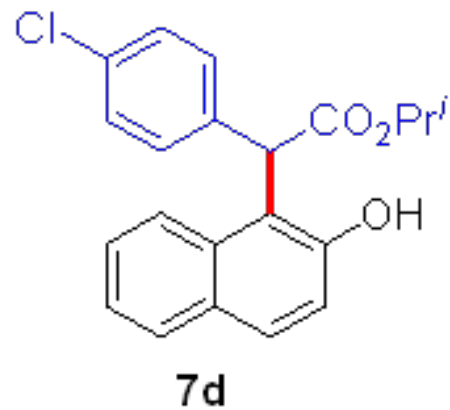

8.497  
7.999  
7.977  
7.848  
7.828  
7.792  
7.770  
7.543  
7.540  
7.525  
7.522  
7.504  
7.501  
7.416  
7.400  
7.395  
7.382  
7.364  
7.260  
7.195  
7.173  
7.101  
7.080  
5.885  
5.217  
5.201  
5.186  
5.170  
5.154

1.388  
1.372  
1.224  
1.209

yzz-15-075-2

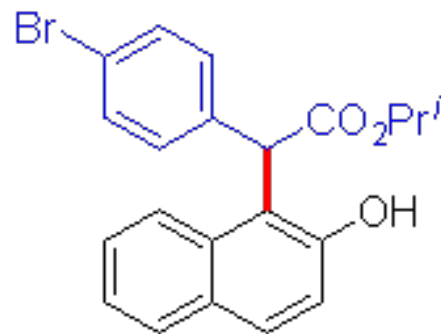

7e

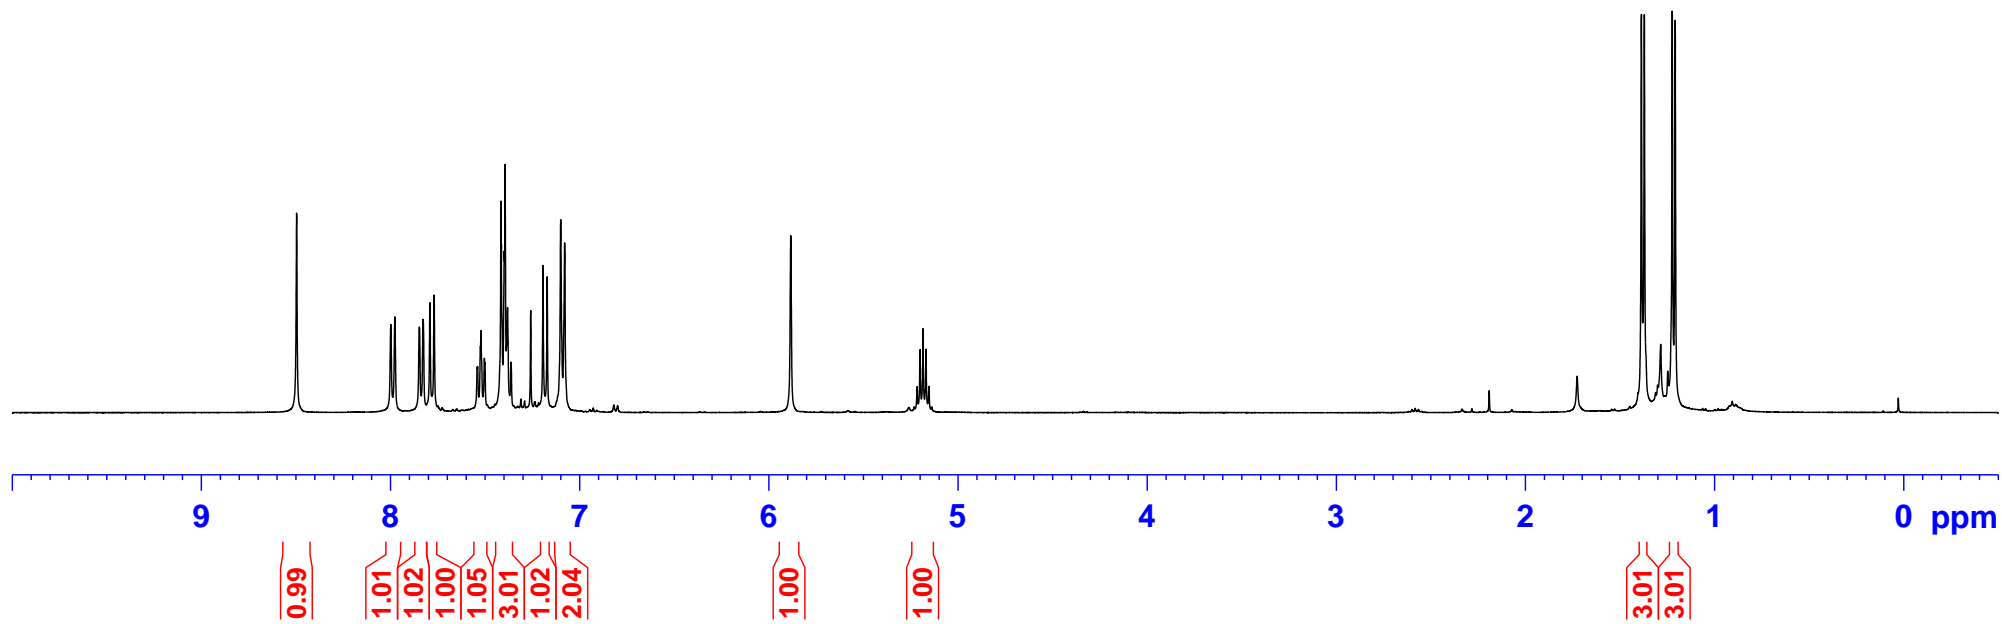

yzz-15-075-2-c

— 175.31

153.92  
135.92  
133.17  
131.62  
130.48  
129.41  
129.32  
128.96  
127.19  
123.29  
121.59  
121.23  
120.43  
114.42

77.32  
77.00  
76.68  
70.65

— 48.32

21.75  
21.46

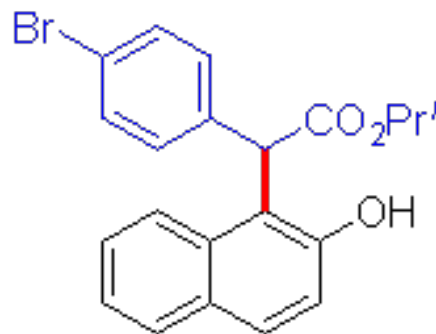

7e

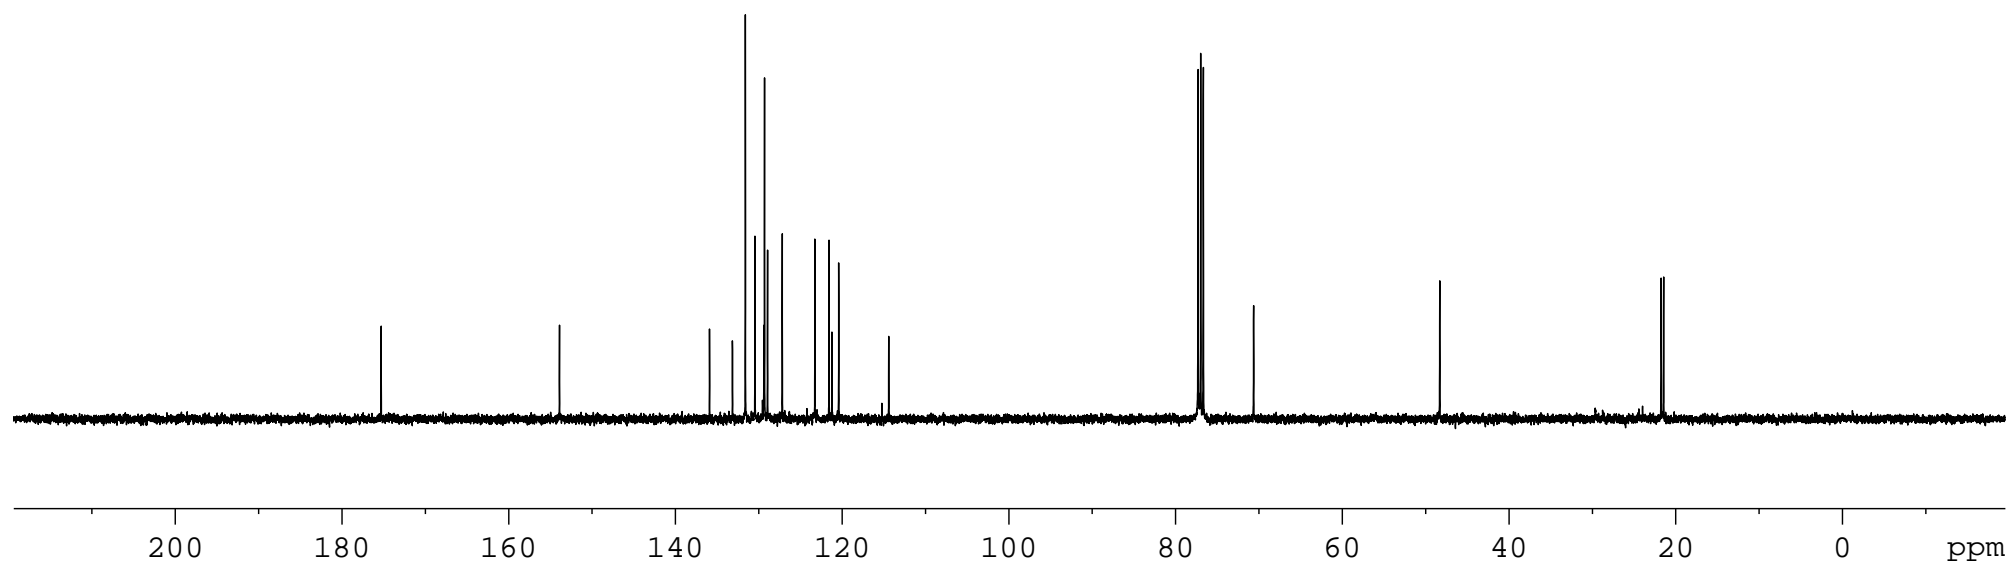

YZZ-15

8.470  
7.995  
7.974  
7.852  
7.832  
7.798  
7.776  
7.550  
7.548  
7.530  
7.512  
7.509  
7.406  
7.386  
7.381  
7.375  
7.260  
7.200  
7.178  
7.149  
7.139  
5.908  
5.224  
5.208  
5.192  
5.177  
5.161

1.394  
1.379  
1.223  
1.207

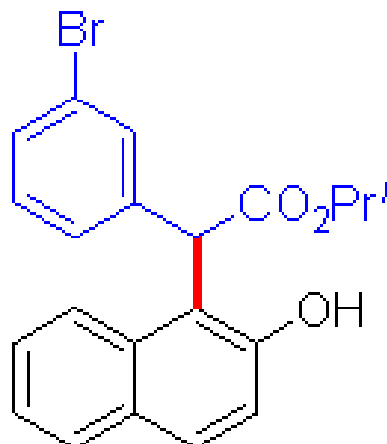

7f

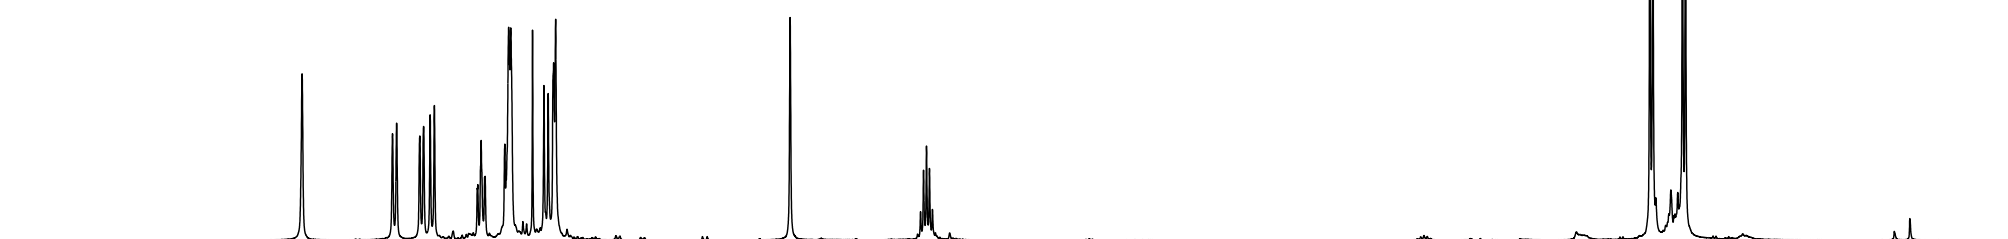

9.5 9.0 8.5 8.0 7.5 7.0 6.5 6.0 5.5 5.0 4.5 4.0 3.5 3.0 2.5 2.0 1.5 1.0 0.5 ppm

1.00  
1.01  
1.01  
1.03  
1.07  
3.00  
3.05  
1.00  
1.03  
3.00  
3.02

yyy-15-065-2-c

—175.13

153.93  
139.19  
133.17  
130.66  
130.55  
130.43  
130.03  
129.42  
128.97  
127.22  
126.28  
123.30  
122.65  
121.58  
120.42  
114.22

77.32  
77.21  
77.00  
76.69  
70.70

—48.44

<21.76  
<21.46

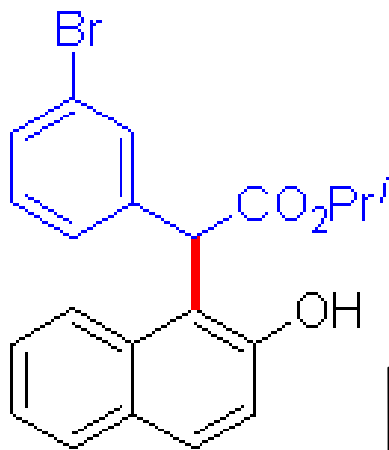

7f

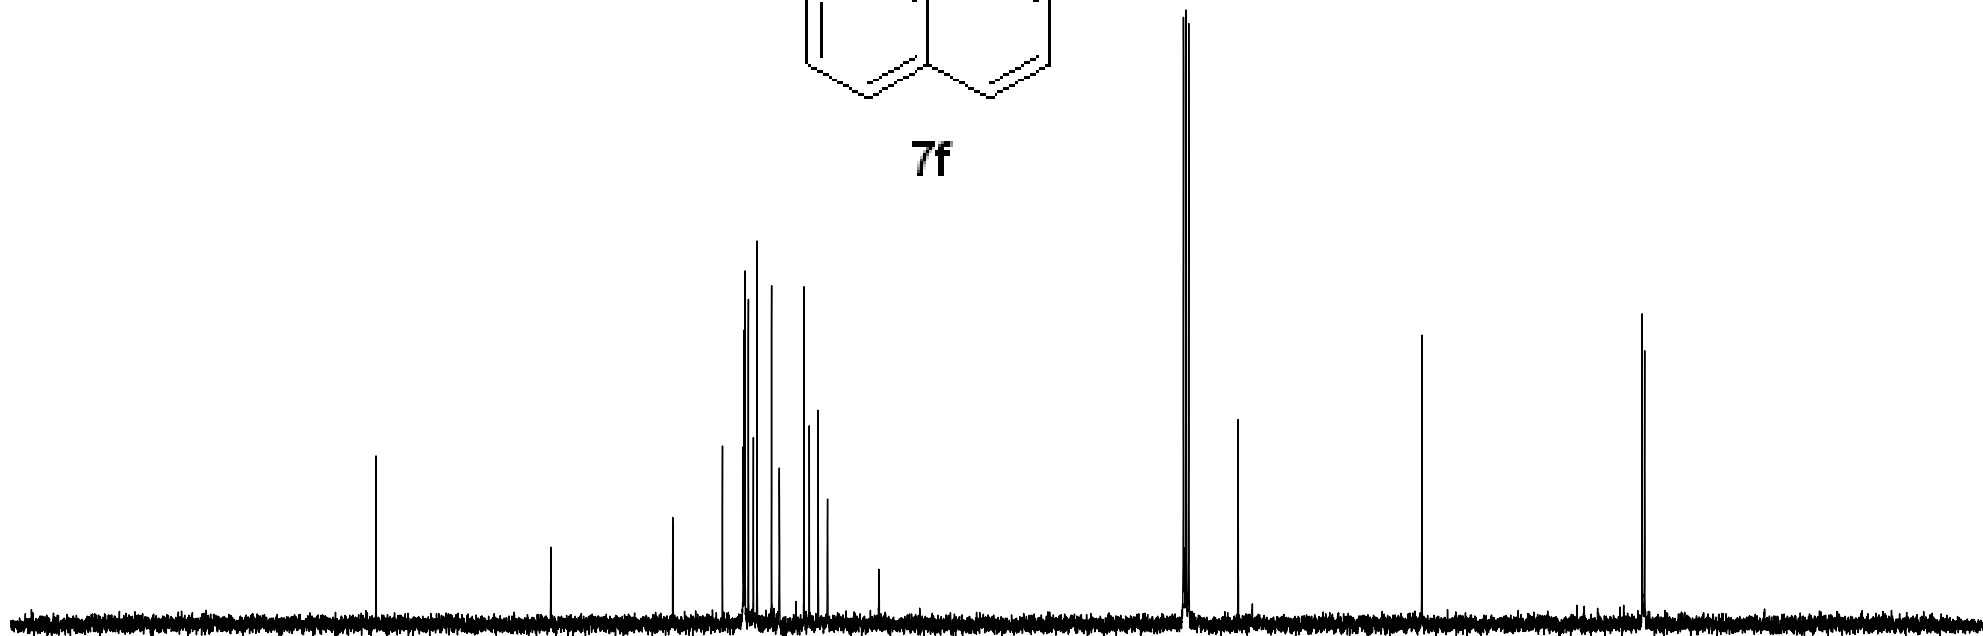

200 180 160 140 120 100 80 60 40 20 0 ppm

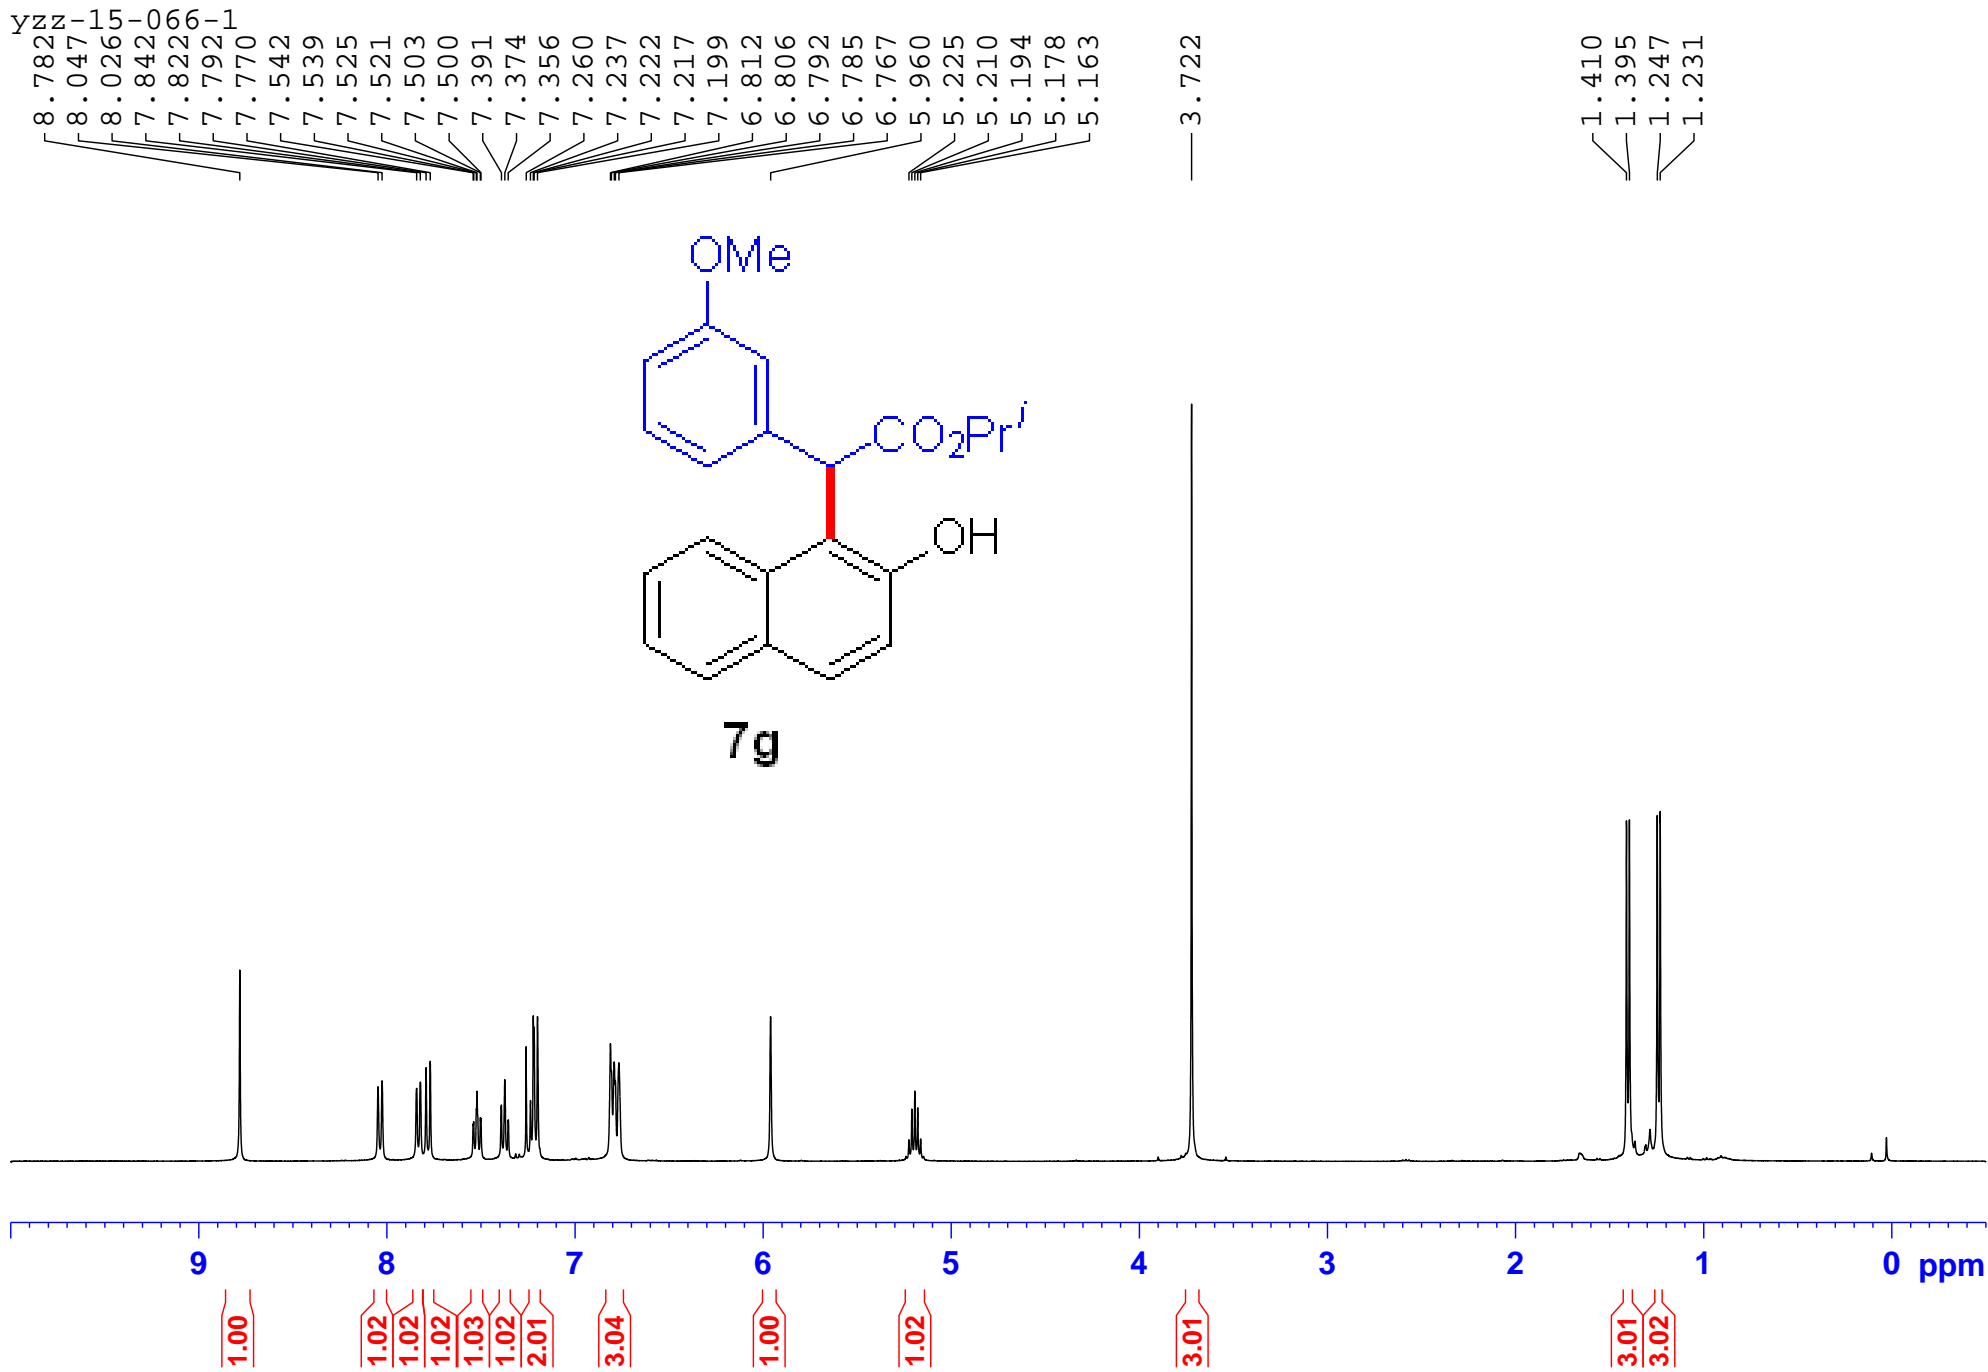

yzz-15-066-1-c

— 175.69

— 159.71

— 154.36

— 138.31

— 133.38

— 130.34

— 129.55

— 129.37

— 128.89

— 127.06

— 123.12

— 121.62

— 120.69

— 119.72

— 114.33

— 113.71

— 112.17

— 77.32

— 77.00

— 76.68

— 70.53

— 55.07

— 48.81

— 21.77

— 21.51

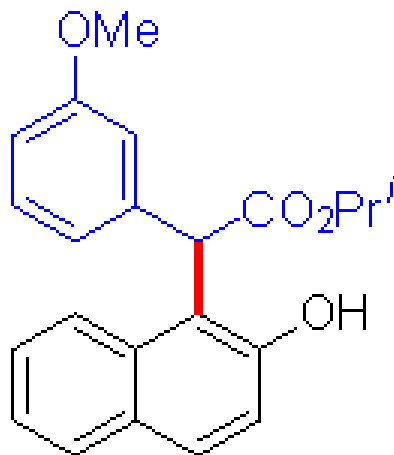

7g

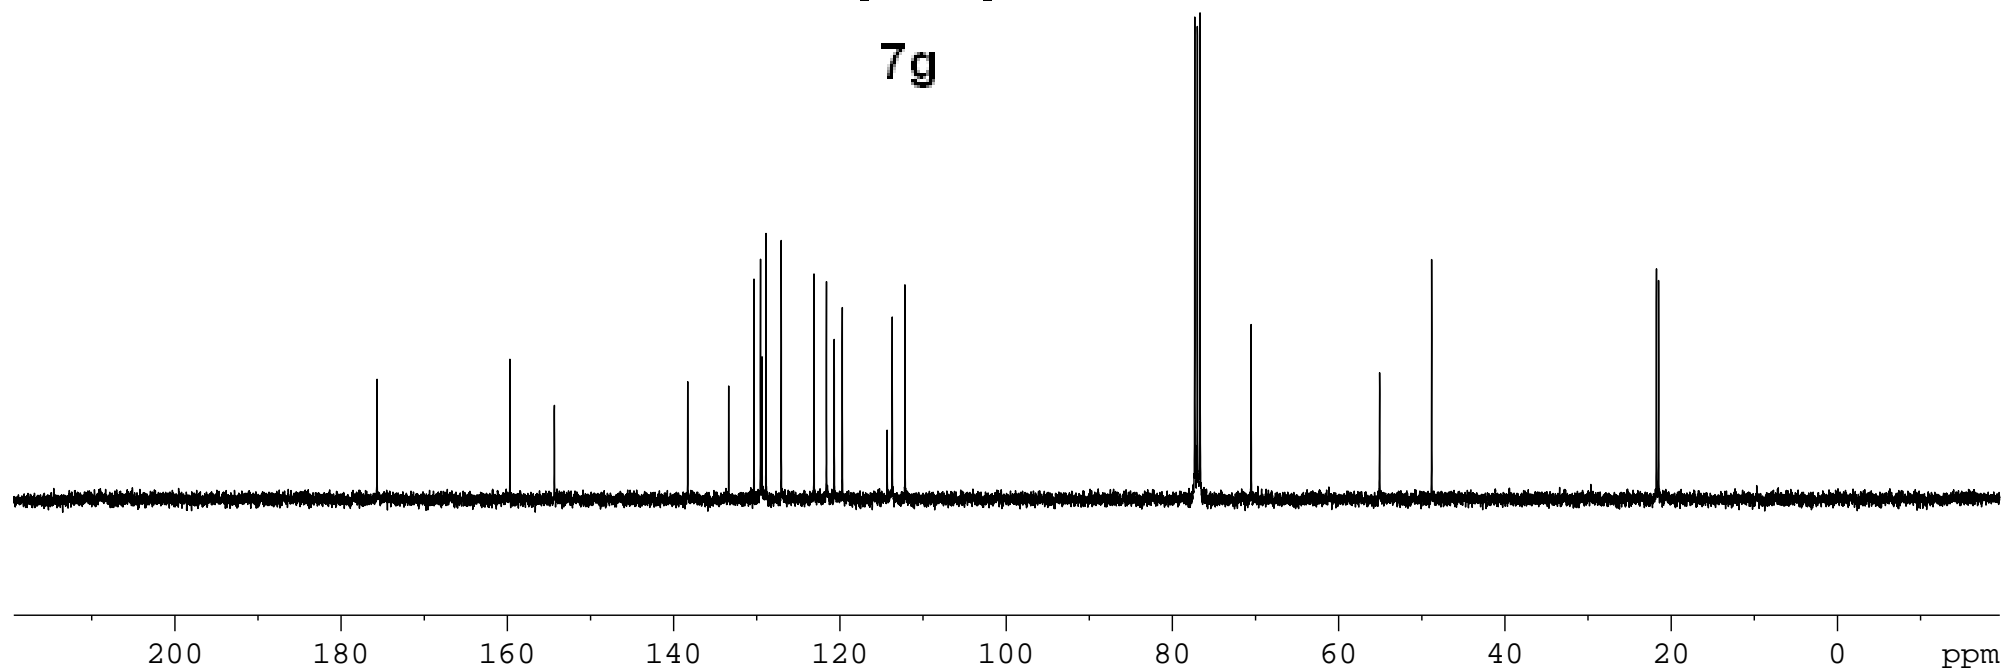



7.976  
 7.954  
 7.817  
 7.797  
 7.775  
 7.753  
 7.502  
 7.499  
 7.482  
 7.463  
 7.461  
 7.366  
 7.348  
 7.329  
 7.249  
 7.241  
 7.232  
 7.220  
 7.207  
 7.188  
 7.166  
 7.116  
 7.091  
 7.070  
 6.966  
 6.964  
 6.953  
 6.021  
 5.156  
 5.141  
 5.125  
 5.109  
 5.094

1.333  
 1.317  
 1.161  
 1.145

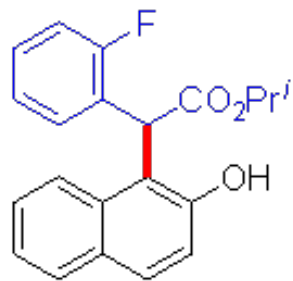

7h

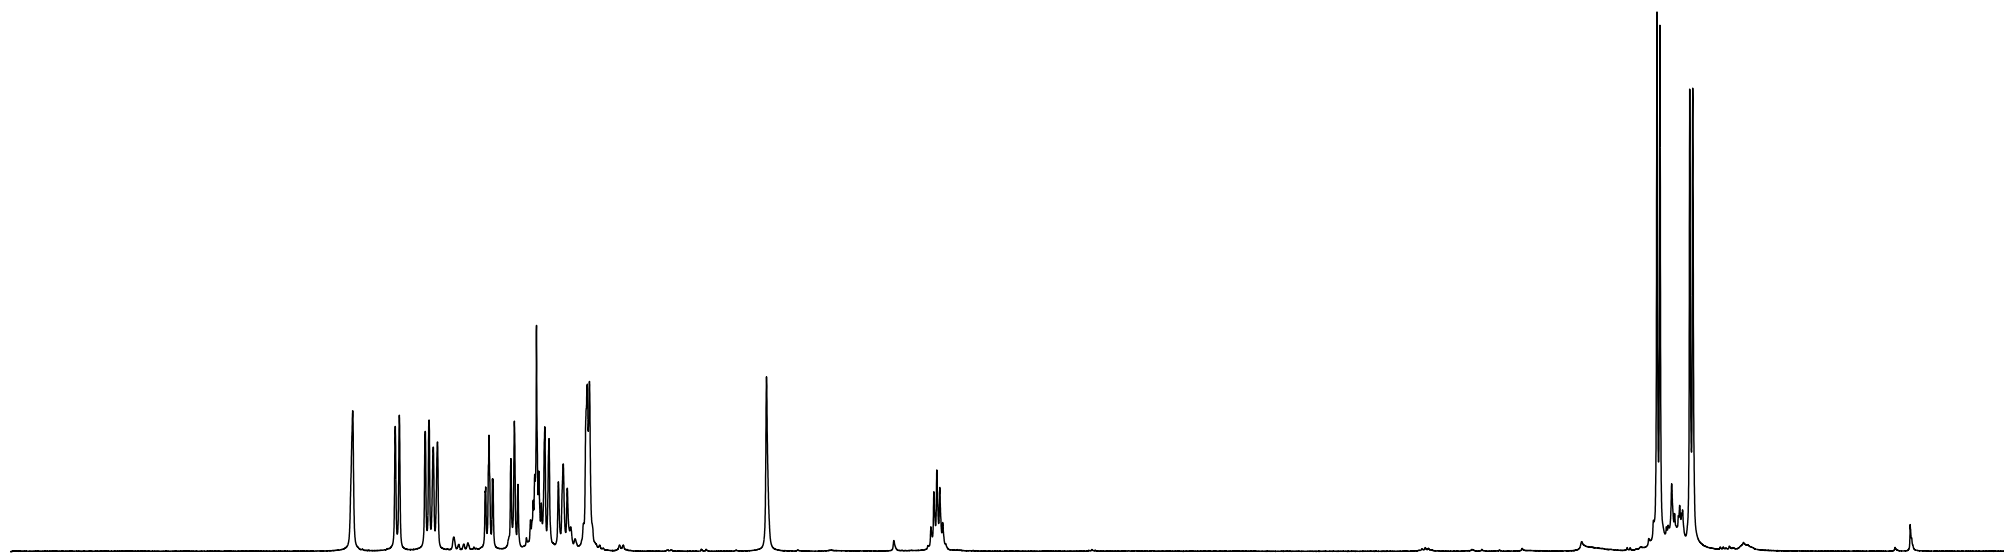

9.5 9.0 8.5 8.0 7.5 7.0 6.5 6.0 5.5 5.0 4.5 4.0 3.5 3.0 2.5 2.0 1.5 1.0 0.5 ppm

0.99  
 1.02  
 2.04  
 1.08  
 1.07  
 1.04  
 1.09  
 1.06  
 2.03

1.00

1.05

3.10  
 3.06

yzz-15-067-1-c

174.92  
162.38  
159.93  
154.24  
133.21  
130.53  
129.59  
129.50  
129.35  
129.27  
128.87  
127.13  
124.16  
124.12  
123.30  
121.85  
120.07  
115.33  
115.11  
112.26  
77.32  
77.00  
76.68  
70.46  
43.63  
21.43  
21.40  
129.63

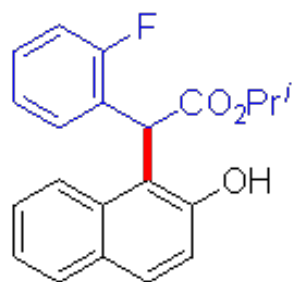

7h

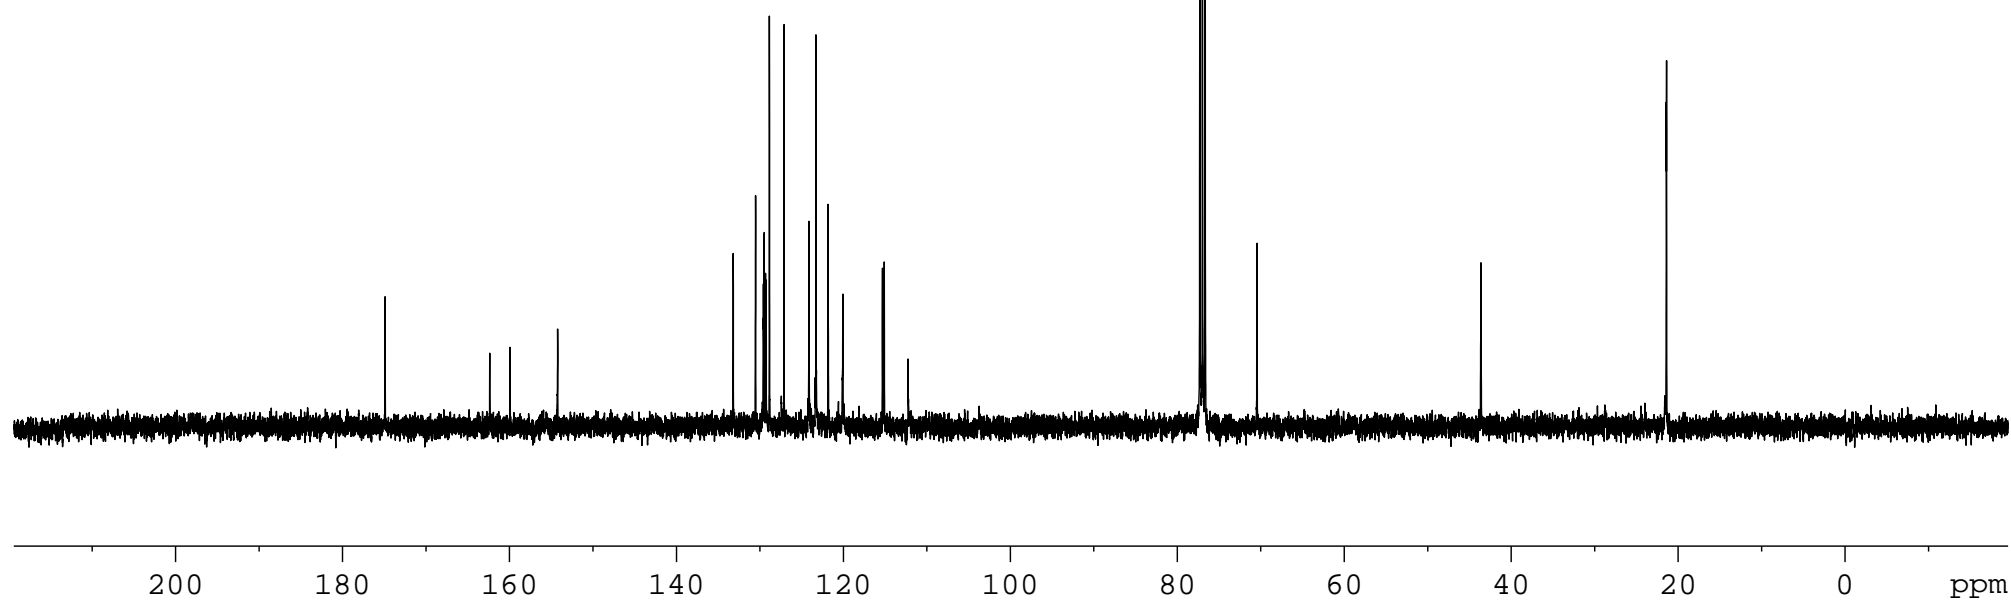

YZZ-15-070-1

8.742  
7.946  
7.941  
7.883  
7.860  
7.660  
7.638  
7.551  
7.546  
7.528  
7.523  
7.294  
7.288  
7.284  
7.272  
7.254  
7.248  
7.232  
7.212  
7.197  
7.175  
7.159  
7.141  
5.876  
5.203  
5.188  
5.172  
5.156  
5.141

1.377  
1.361  
1.217  
1.201

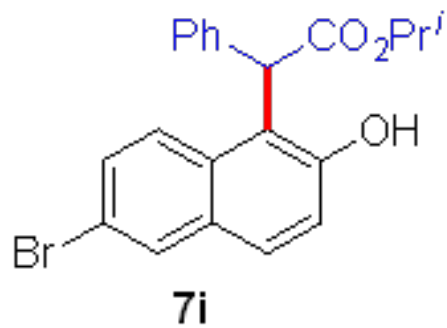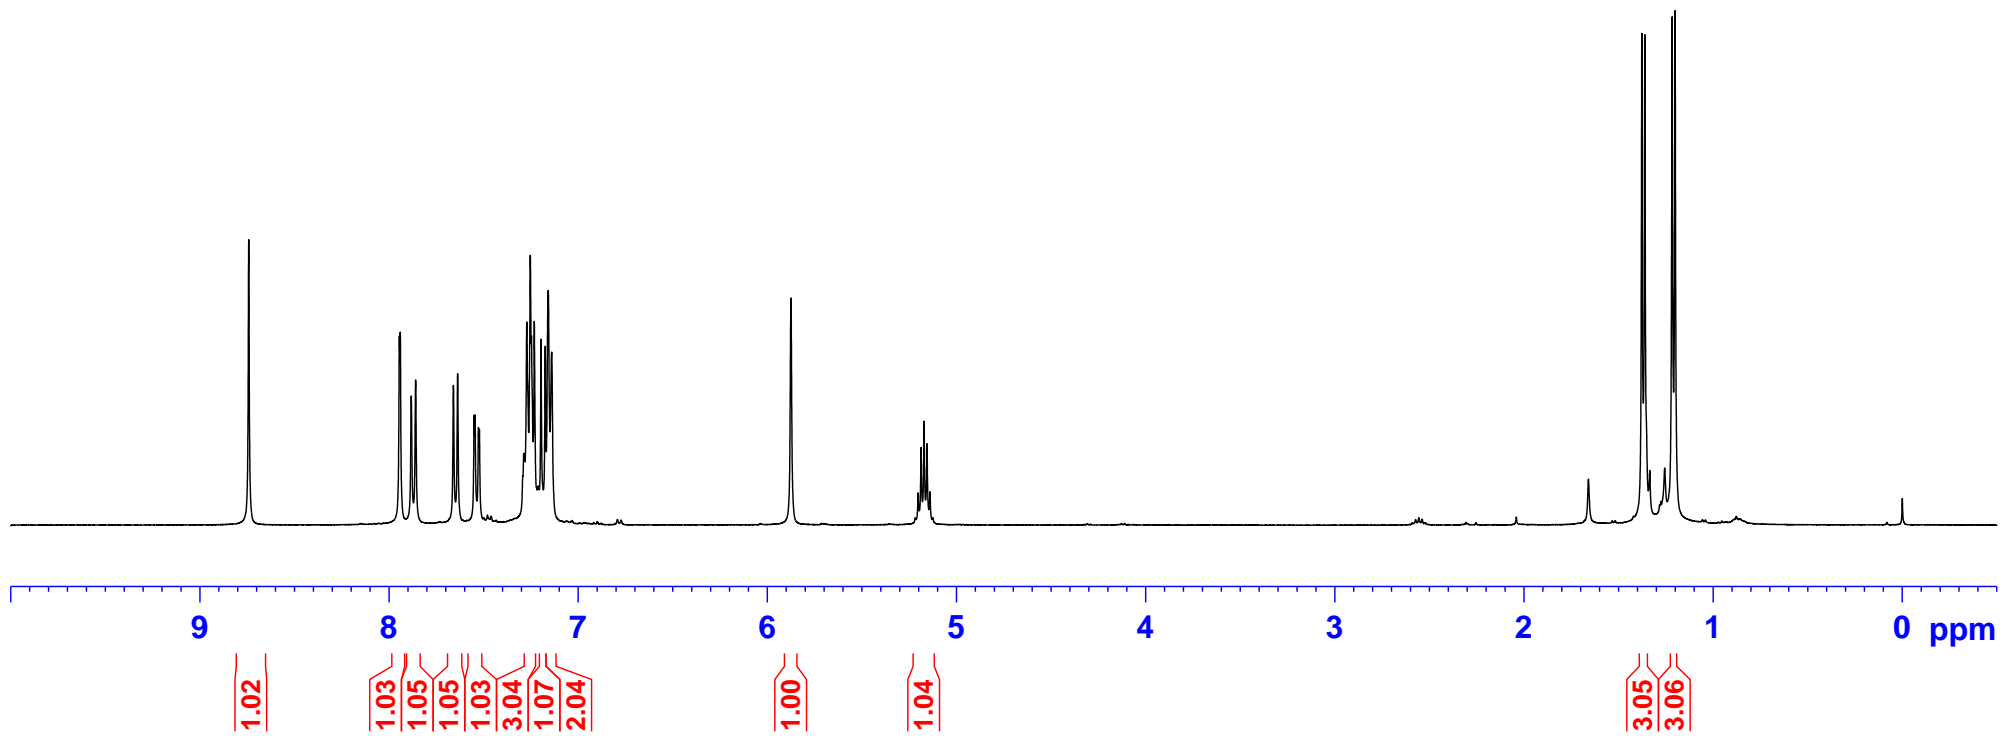

yzz-15-070-1-c

— 175.56

154.53  
136.39  
131.97  
130.72  
130.58  
130.17  
129.36  
128.66  
127.40  
127.31  
123.65  
121.82  
116.79  
114.83

77.32  
77.00  
76.68  
70.69

— 48.90

21.75  
21.50

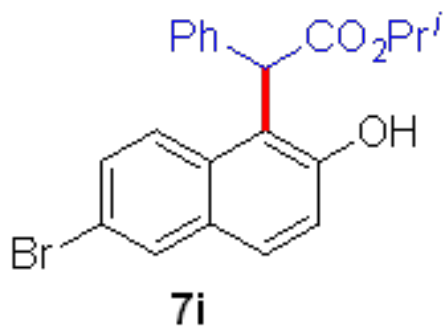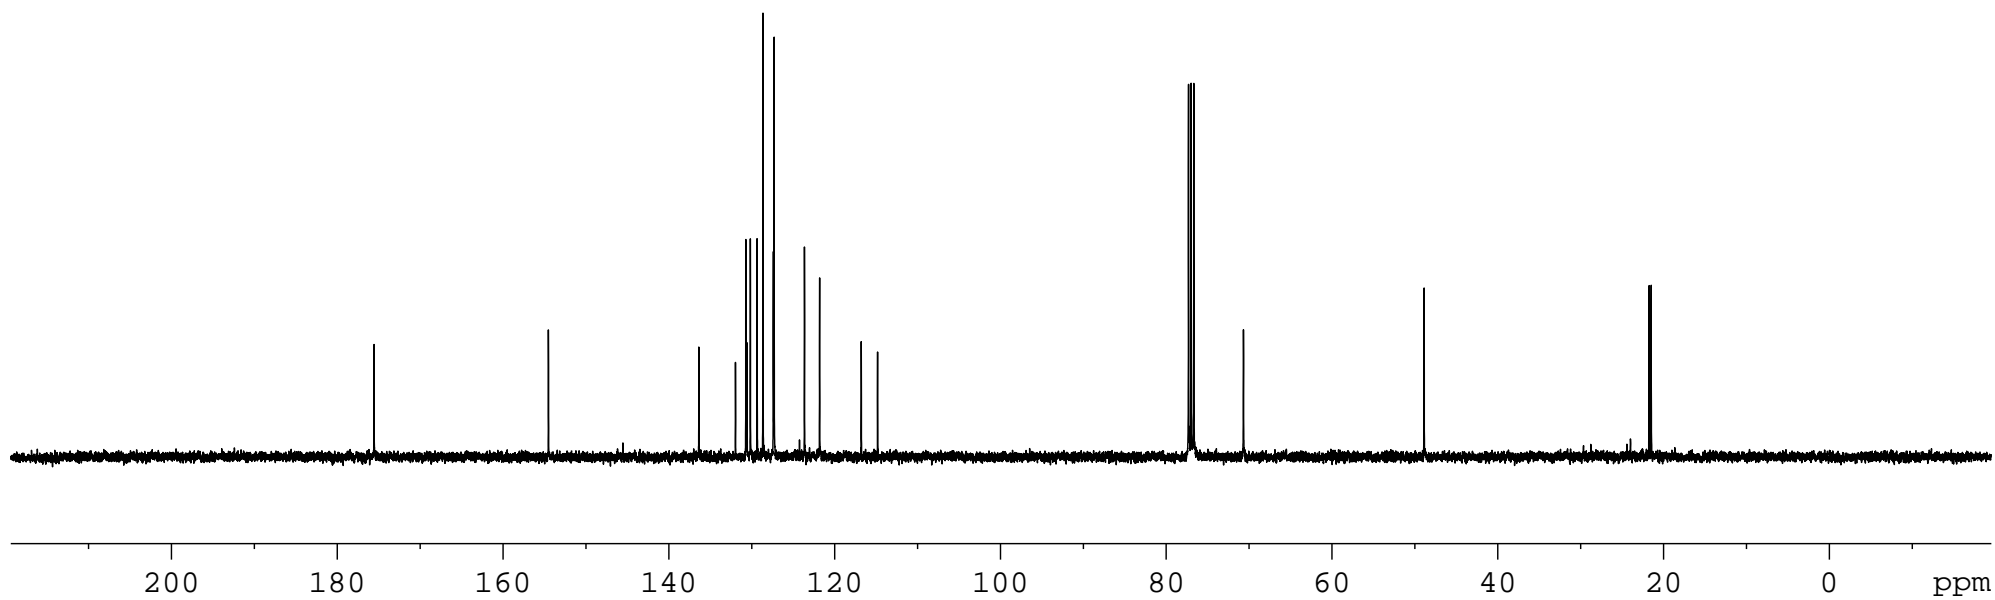

8.760  
8.090  
8.068  
8.008  
7.812  
7.789  
7.767  
7.745  
7.695  
7.677  
7.469  
7.450  
7.432  
7.357  
7.339  
7.320  
7.292  
7.274  
7.257  
7.241  
7.218  
7.196  
7.192  
5.983  
5.210  
5.194  
5.178  
5.163  
5.149

1.379  
1.364  
1.220  
1.204

yzz-15-071-2

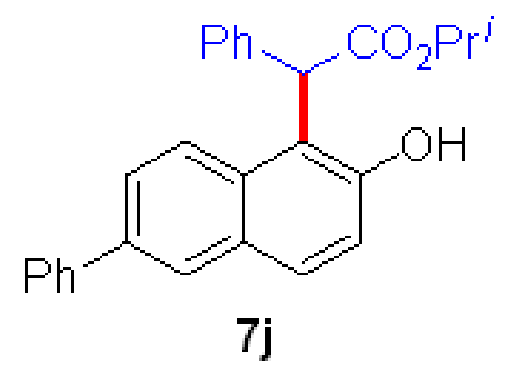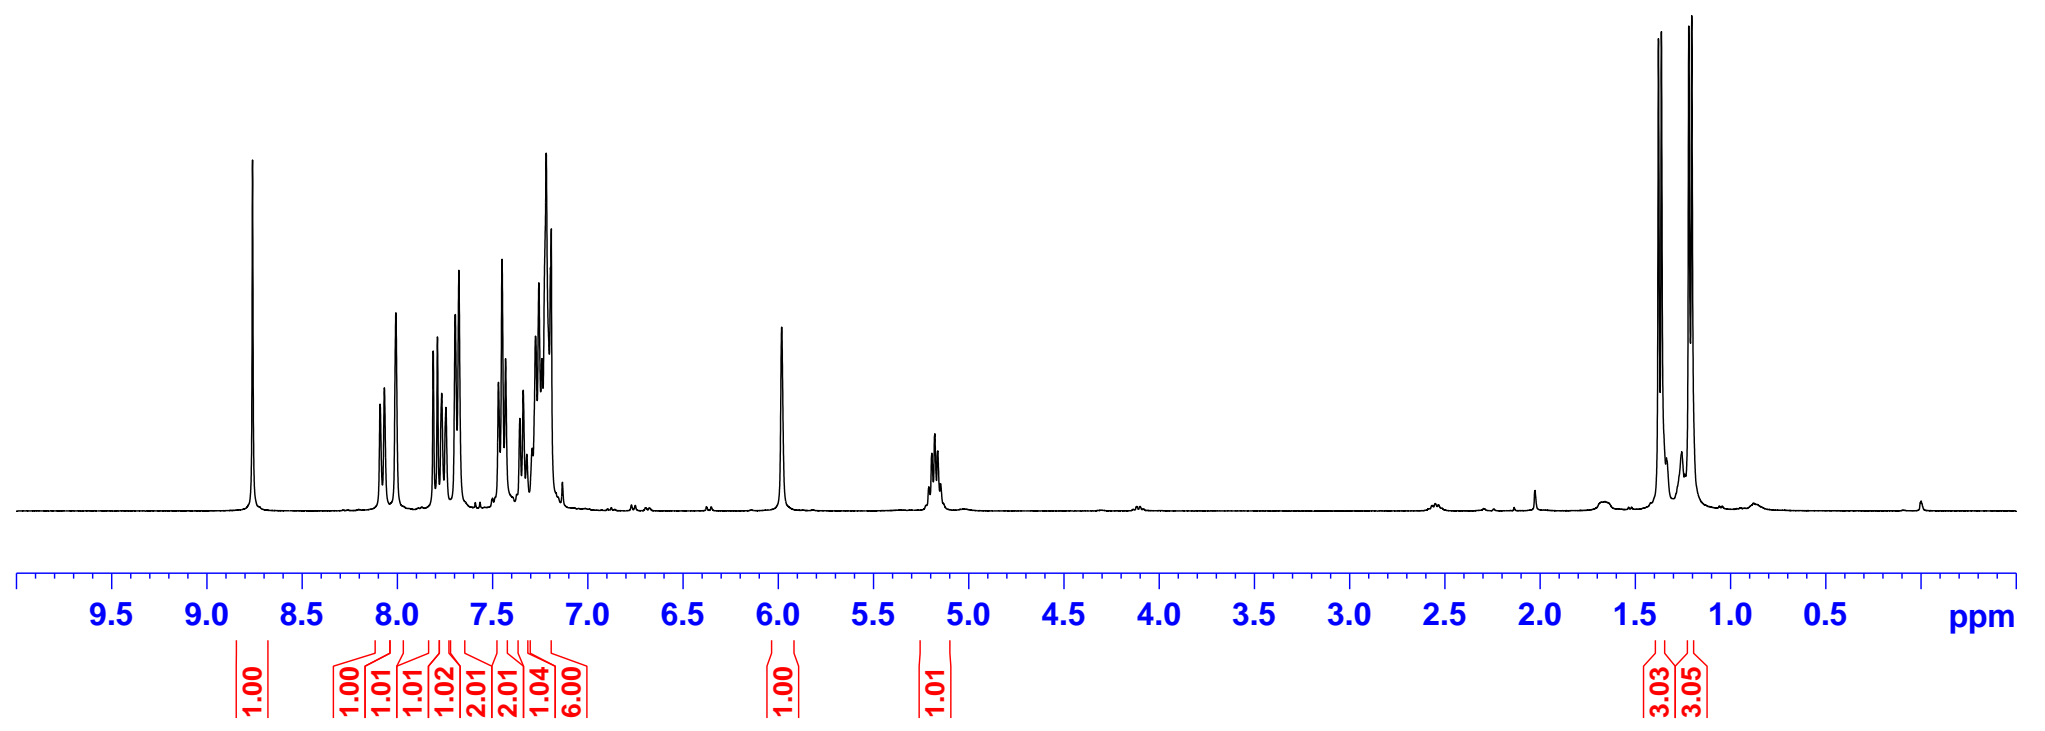

yzz-15-071-2<sub>1</sub>C

— 175.80<sub>1</sub>C

154.36  
140.63  
136.70  
135.84  
132.58  
130.59  
129.64  
128.82  
128.61  
127.40  
127.29  
127.15  
127.09  
126.69  
126.58  
122.35  
121.11  
114.52

77.32  
77.00  
76.68  
70.55

— 48.96

21.77  
21.51

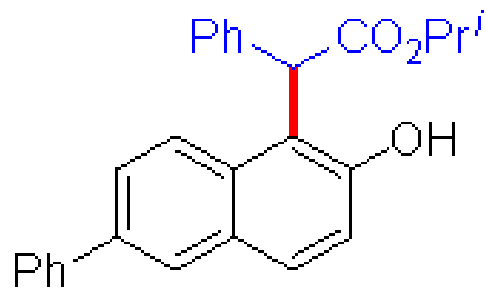

7j

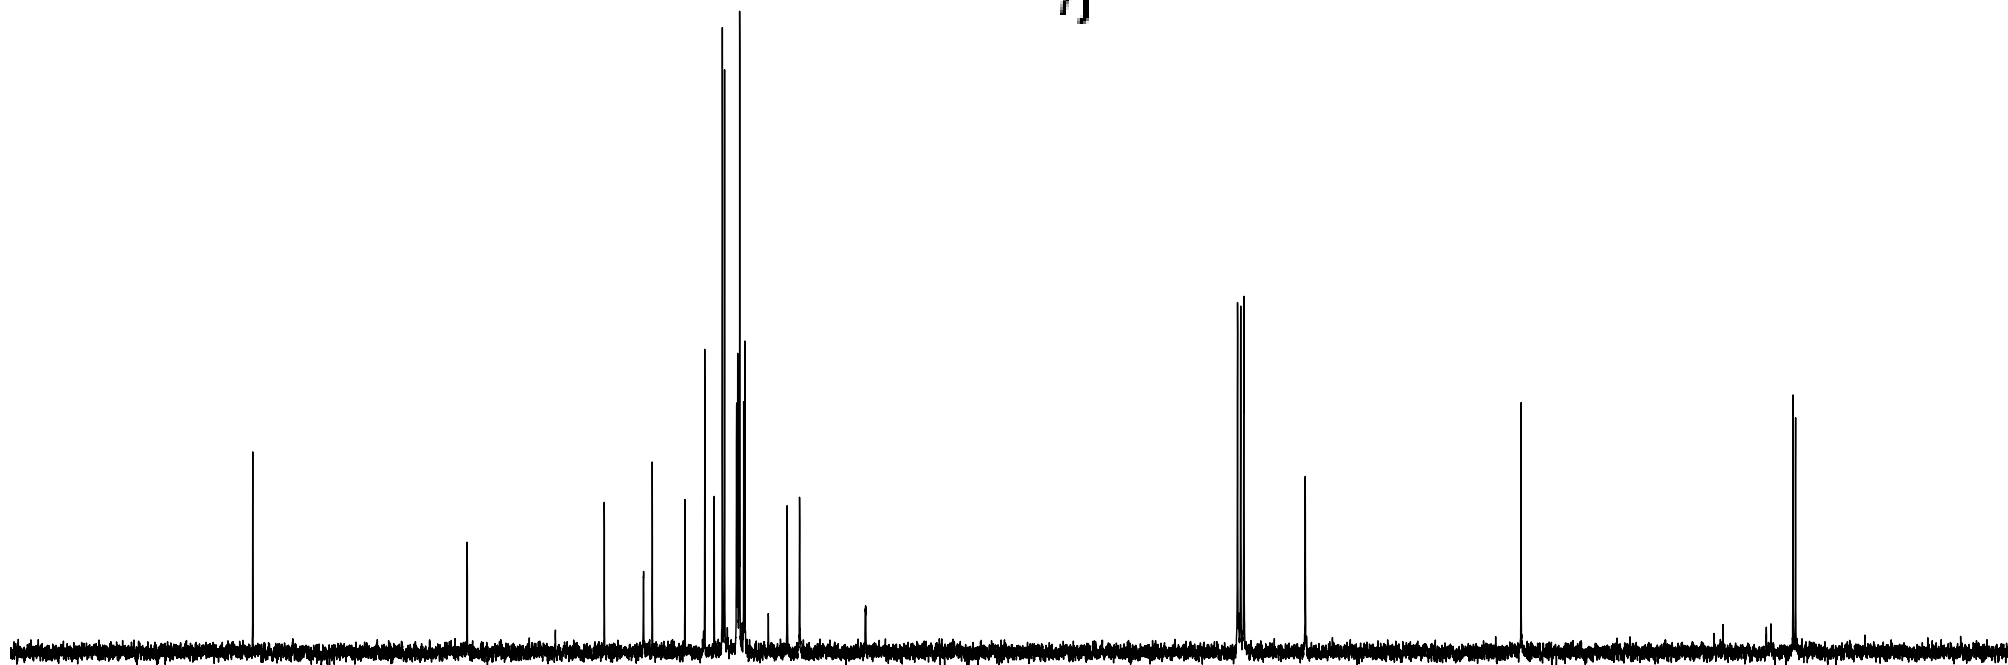

190 180 170 160 150 140 130 120 110 100 90 80 70 60 50 40 30 20 10 ppm

yzz-16-020-2

7.826  
7.818  
7.804  
7.796  
7.689  
7.373  
7.370  
7.349  
7.326  
7.298  
7.281  
7.267  
7.266  
7.248  
7.234  
7.204  
7.187  
— 5.725

3.923  
3.849  
3.831  
3.813  
3.795  
3.686  
3.632

1.545  
1.527

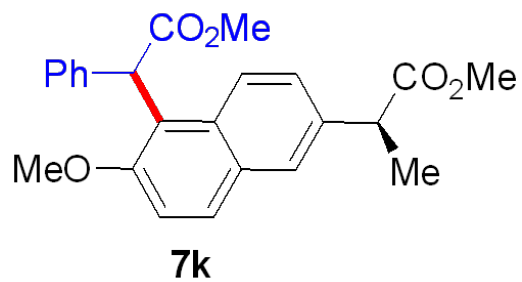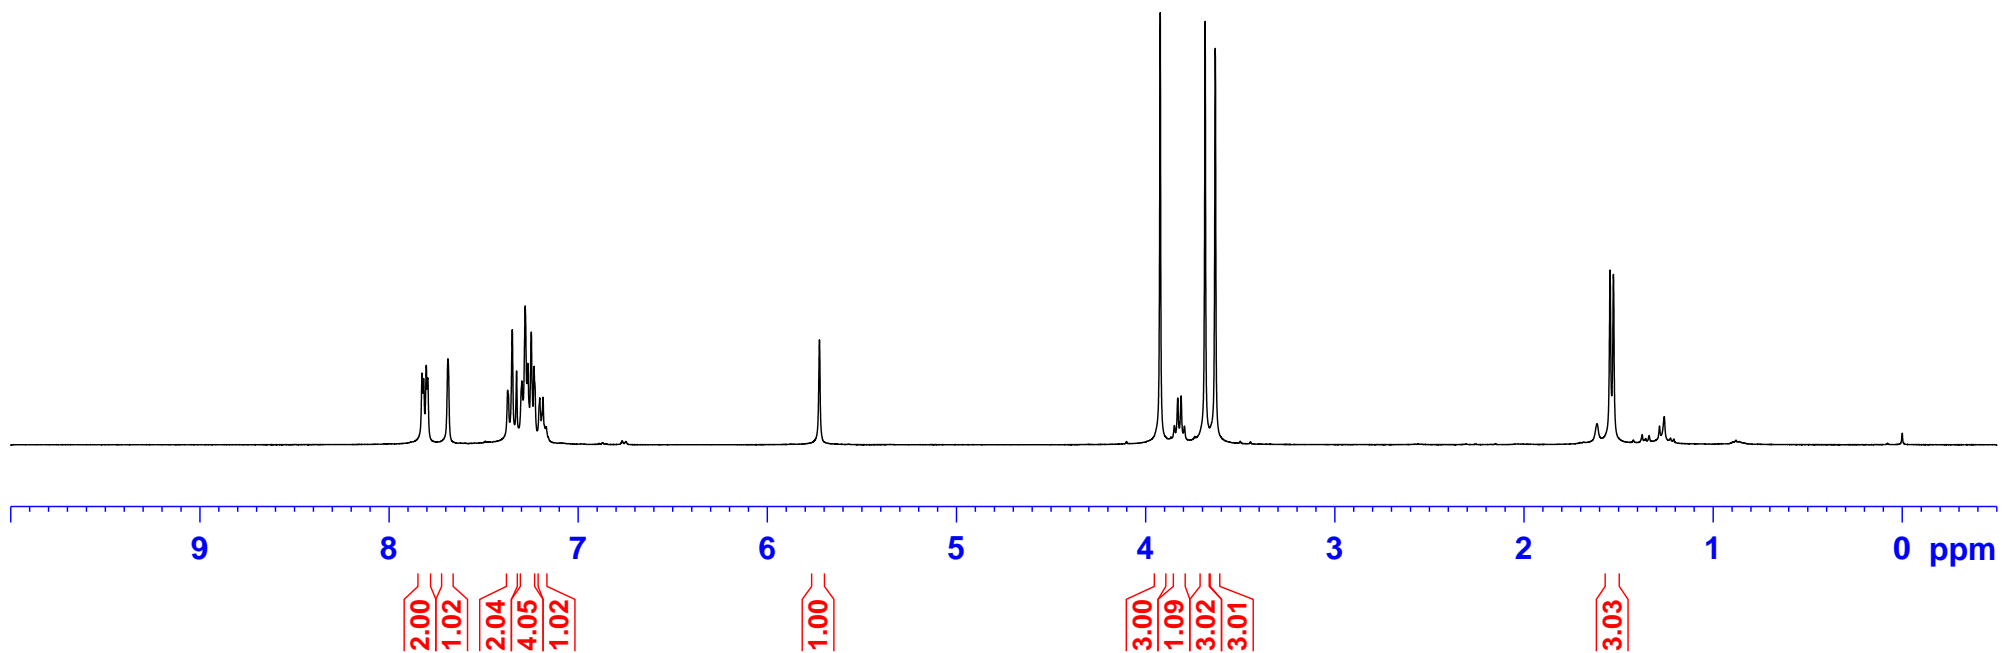

yyy-16-020-1-c

174.90  
173.89

154.45

137.77  
135.57  
135.54  
131.84  
129.57  
129.12  
128.18  
126.86  
123.61  
120.53  
113.95

77.32  
77.00  
76.68

56.54  
52.10  
51.99  
48.39  
45.06

18.41

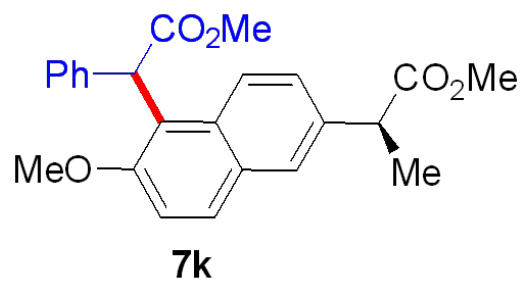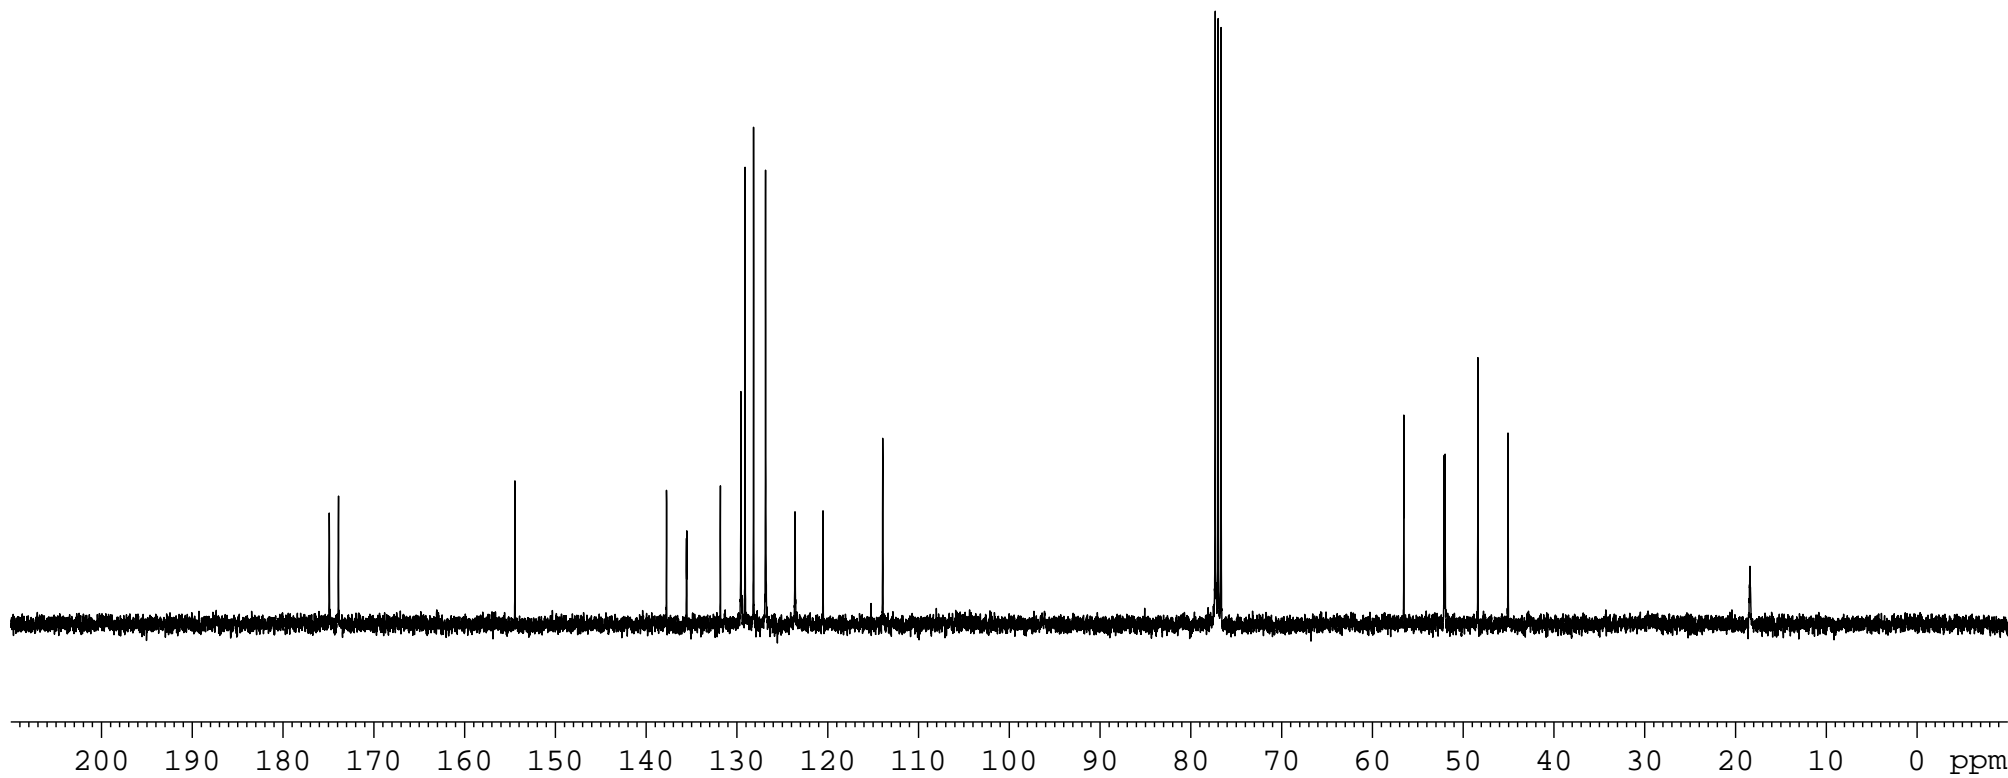



yzz-15-090-2

8.1410  
8.1192  
8.103  
8.083  
7.676  
7.661  
7.643  
7.638  
7.622  
7.605  
7.421  
7.401  
7.372  
7.356  
7.337  
7.319  
7.260

5.710  
5.151  
5.135  
5.120  
5.104  
5.088

1.260  
1.244  
1.213  
1.197

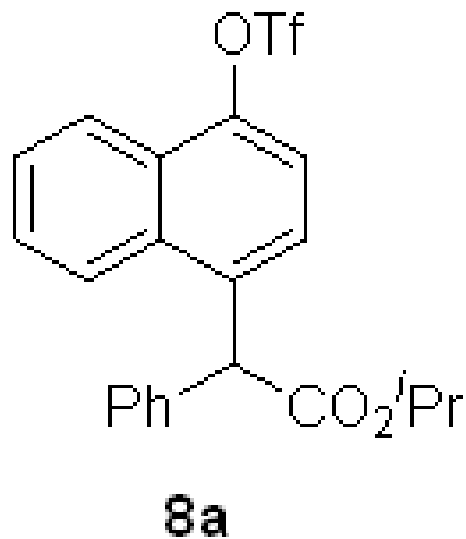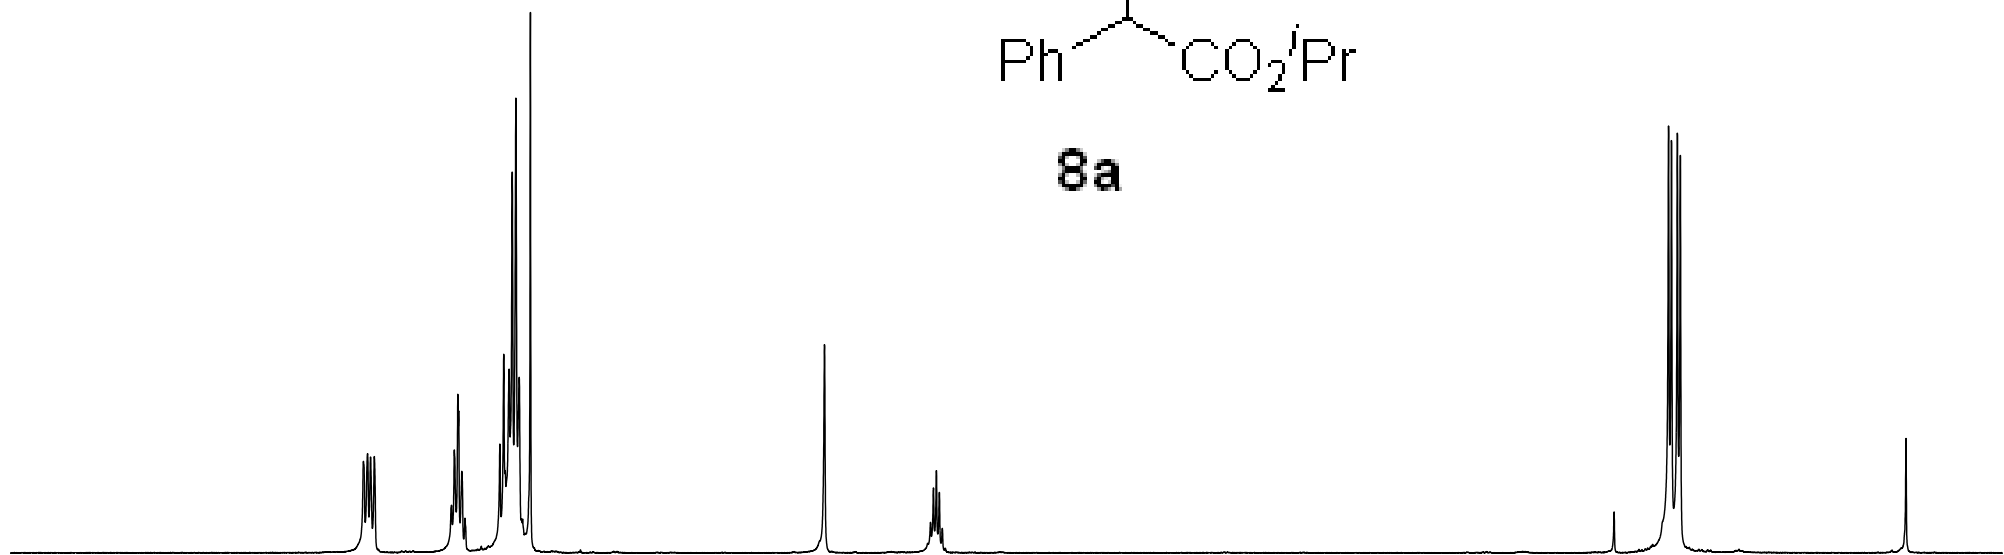

9.5 9.0 8.5 8.0 7.5 7.0 6.5 6.0 5.5 5.0 4.5 4.0 3.5 3.0 2.5 2.0 1.5 1.0 0.5 ppm

2.03

2.07

7.08

1.00

1.04

3.05

3.01

yzz-15-090-3-c

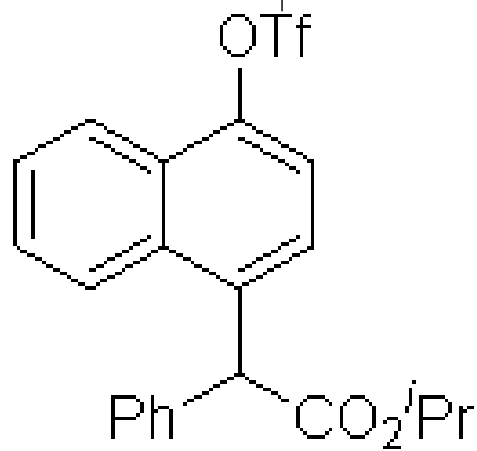

**8a**

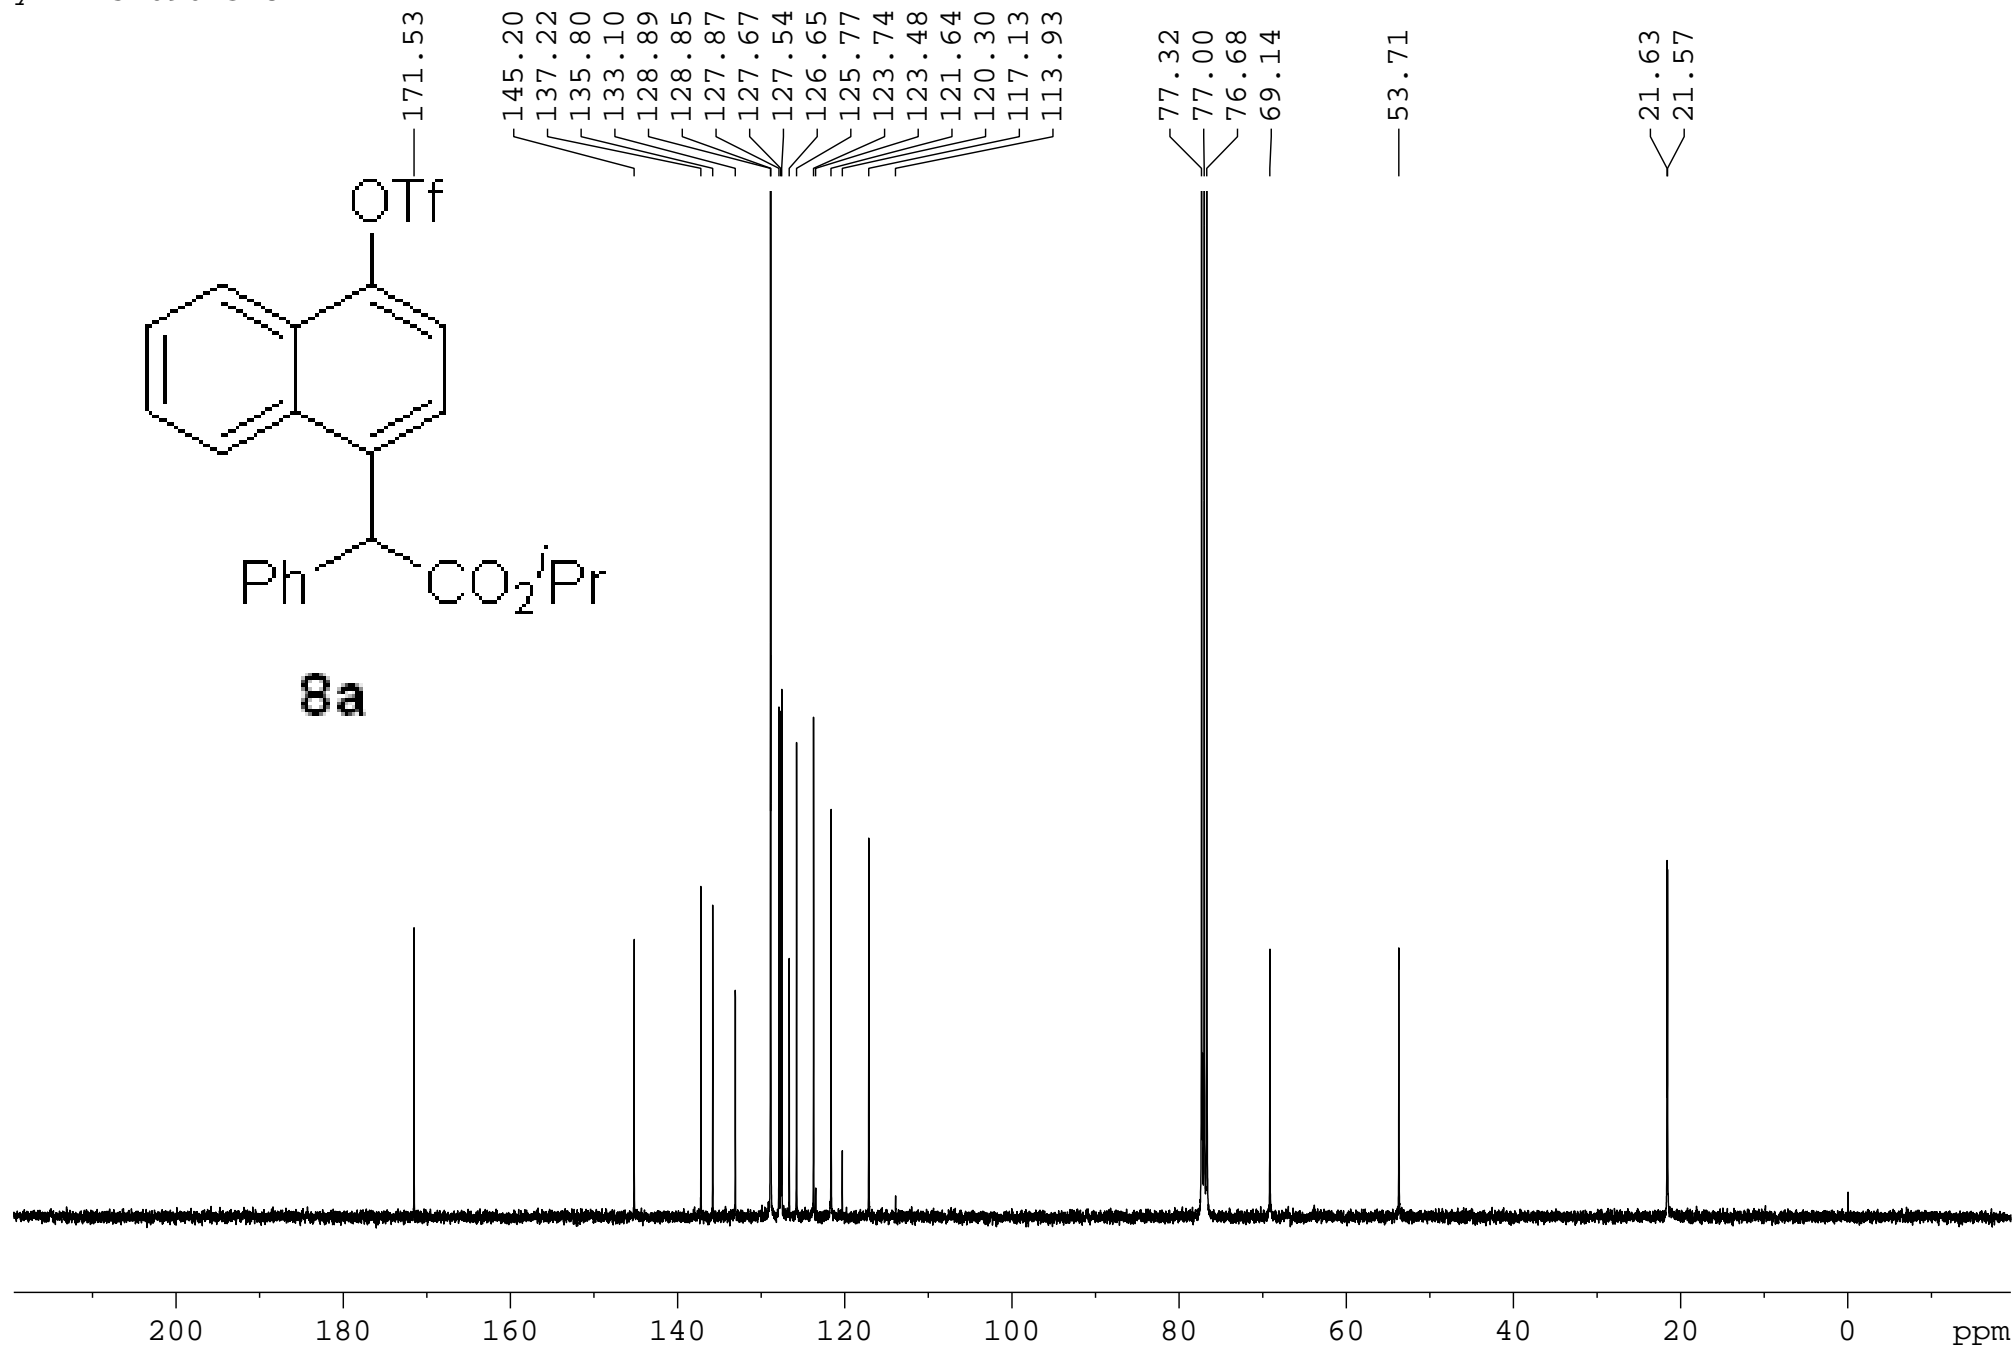

yzz-15-085-1

8.135  
8.114  
7.974  
7.954  
7.529  
7.513  
7.502  
7.468  
7.459  
7.437  
7.417  
7.393  
7.375

5.830  
5.219  
5.203  
5.188  
5.172  
5.157

1.310  
1.294  
1.283  
1.268

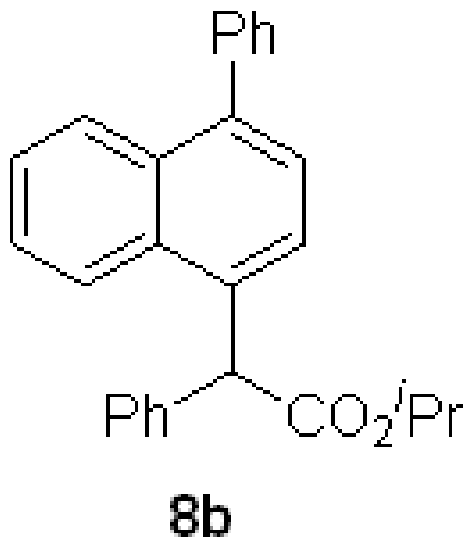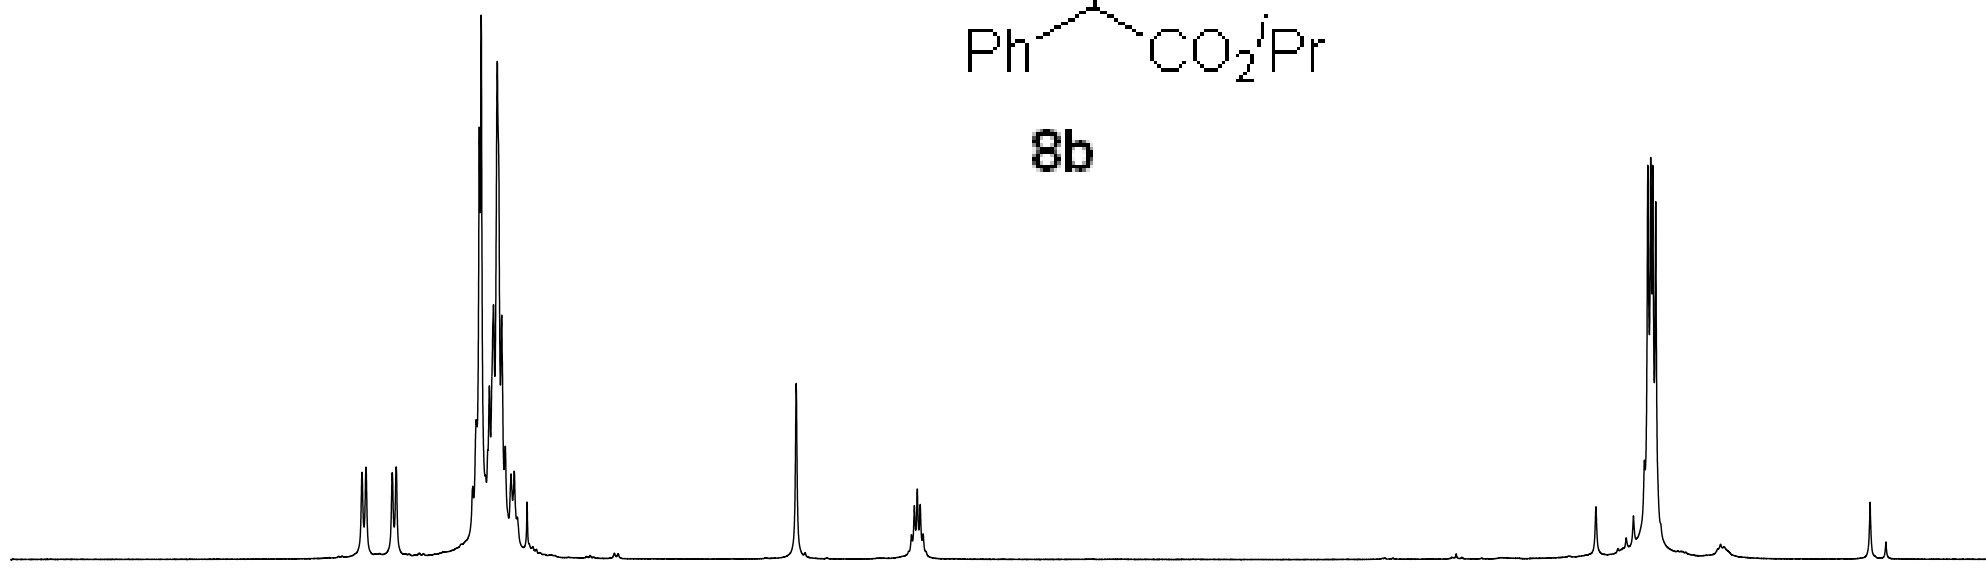

9 8 7 6 5 4 3 2 1 0 ppm

1.01  
1.03

14.08

1.00

1.08

3.07  
3.06

yzz-15-085-1

— 172.27

140.66  
140.09  
138.07  
134.23  
132.15  
131.91  
130.10  
129.01  
128.63  
128.19  
127.31  
127.22  
127.06  
126.42  
126.20  
125.76  
125.65  
123.46

77.32  
77.00  
76.68  
— 68.79

— 53.90

— 21.67

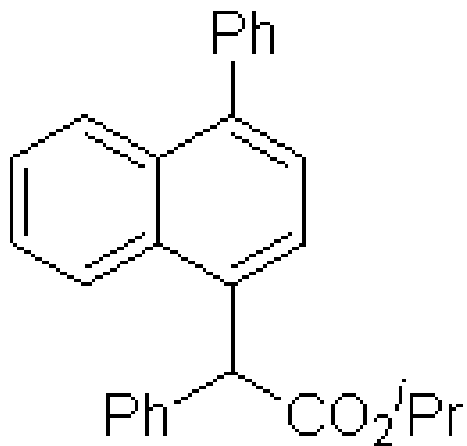

**8b**

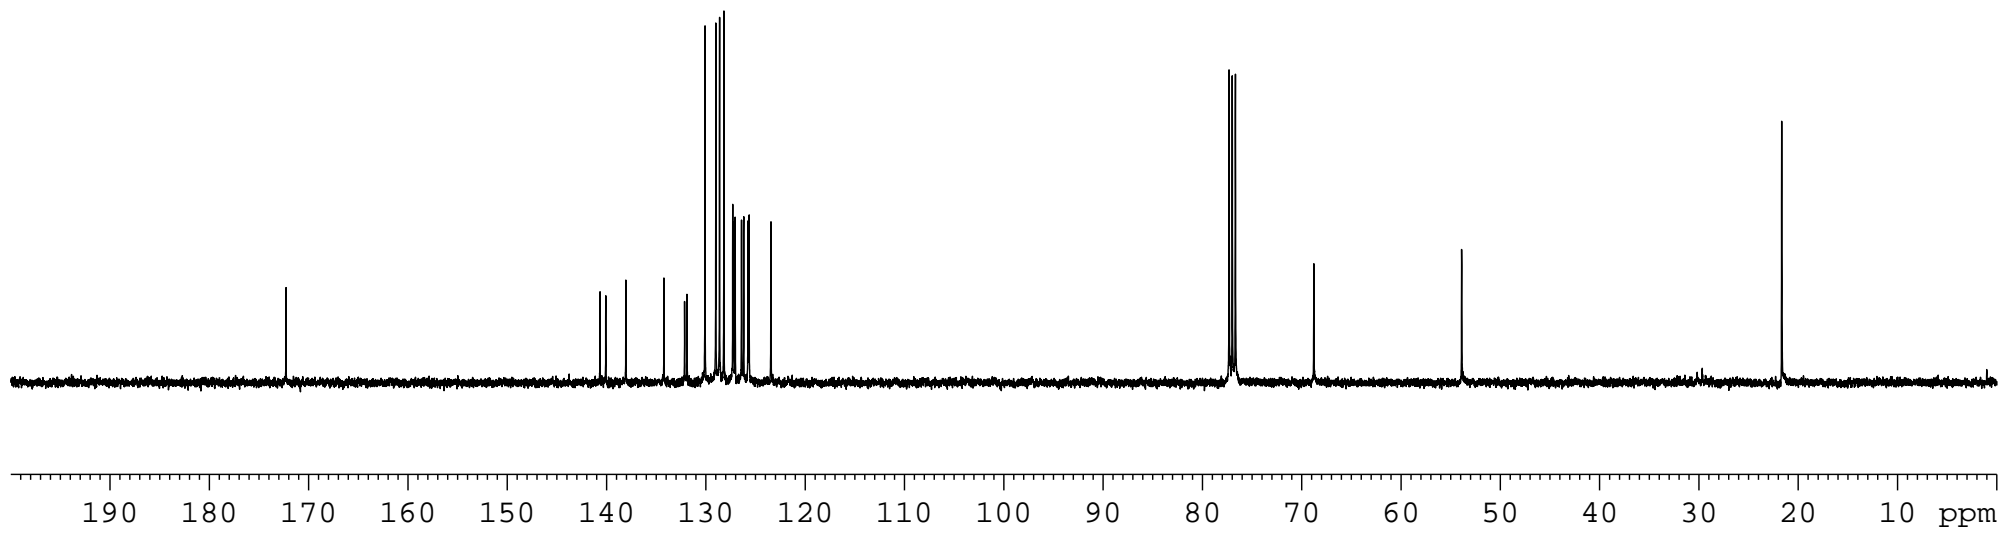

yyy-15-092-1

8.269  
8.248  
7.871  
7.850  
7.517  
7.499  
7.433  
7.415  
7.395  
7.374  
7.356  
7.172  
7.157  
7.152  
7.141

5.569  
4.990  
4.974  
4.959  
4.943  
4.927

1.063  
1.046  
1.030

0.179

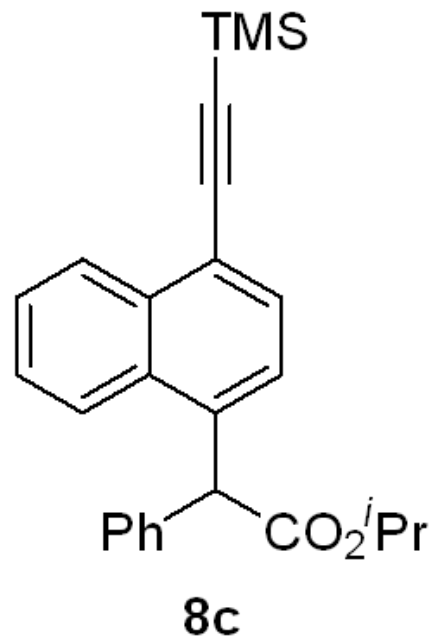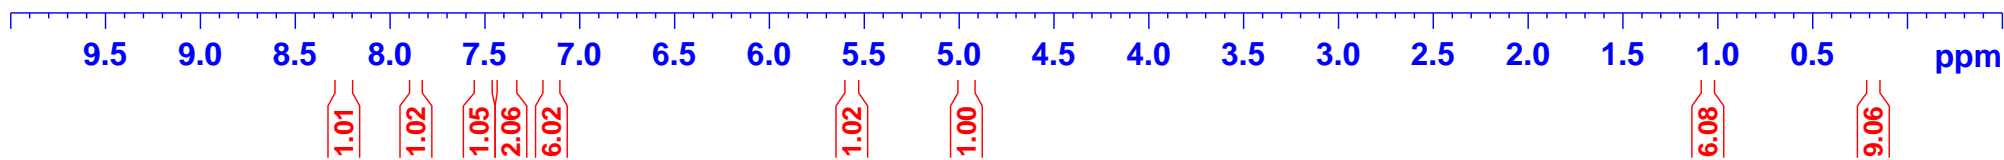

yzz-15-092-1-c

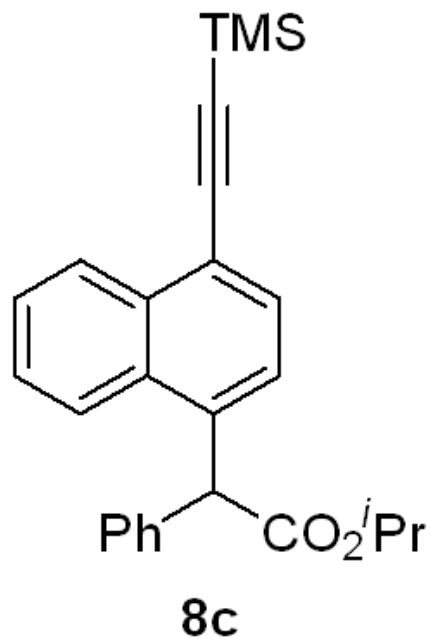

171.89  
137.78  
135.86  
133.77  
131.41  
130.33  
128.91  
128.63  
127.37  
127.17  
126.84  
126.52  
125.54  
123.60  
120.70  
102.98  
99.79

77.32  
77.00  
76.68  
68.83

53.92

21.62  
21.57

0.06

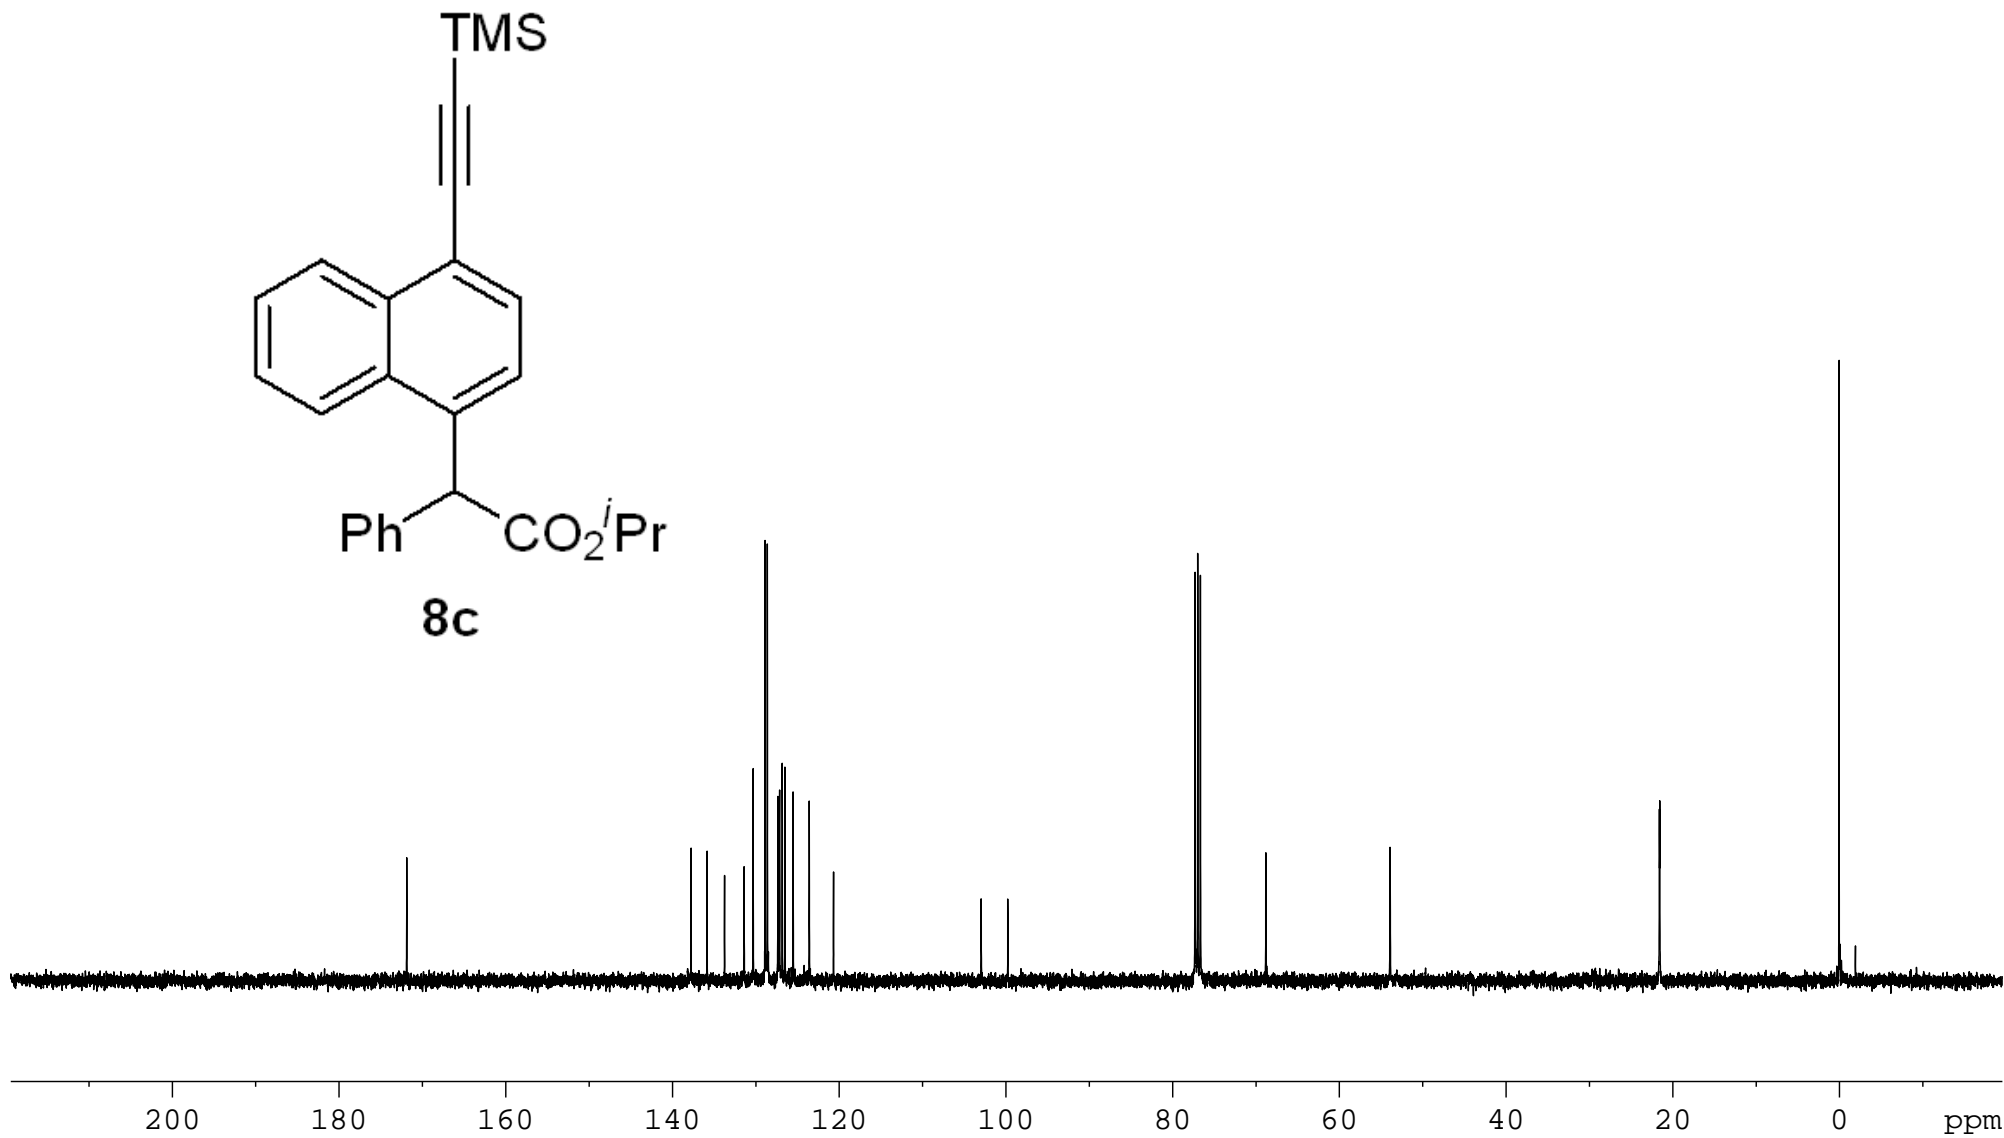

YZZ-15-094-1

8.088  
7.634  
7.631  
7.617  
7.614  
7.596  
7.593  
7.570  
7.567  
7.550  
7.547  
7.532  
7.529  
7.410  
7.391  
7.380  
7.378  
7.360  
7.356  
7.342  
7.333  
7.321  
7.317  
7.302  
7.293  
7.285  
7.259  
5.787  
5.169  
5.153  
5.137  
5.122  
5.106  
3.999

1.248  
1.233  
1.222  
1.206

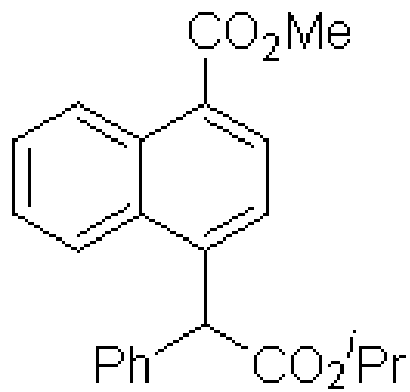

**8d**

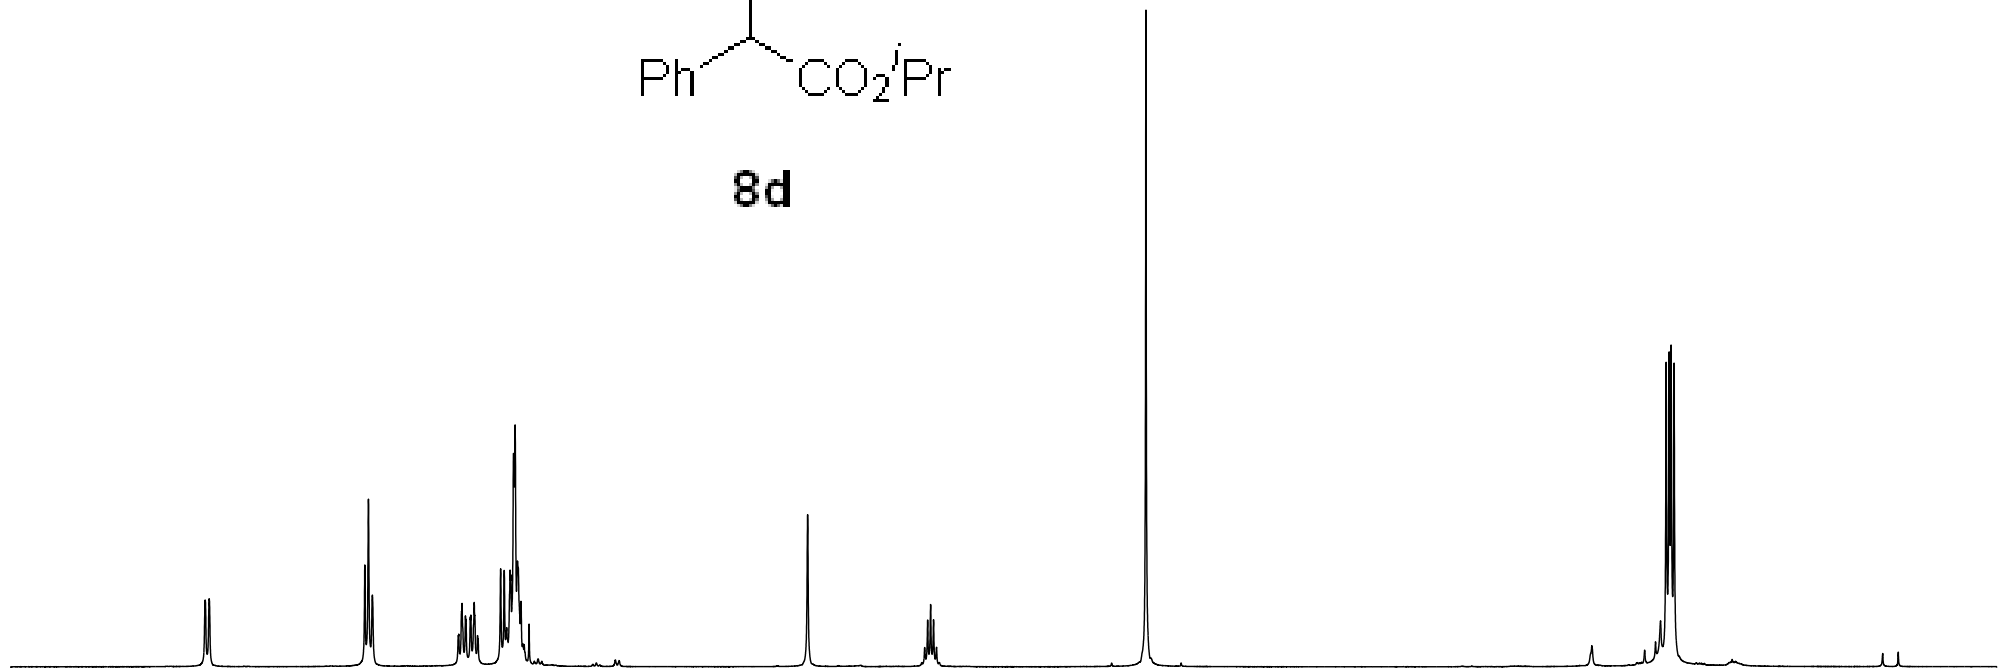

9

1.01

8

2.06

7

2.01

6

6.04

6

1.00

5

1.02

4

3.06

3

2

1

3.04

3.01

0 ppm

yzz-15-094-1-c

171.69  
167.91  
139.95  
137.46  
131.97  
131.68  
129.46  
128.91  
128.70  
127.49  
127.30  
127.01  
126.68  
126.57  
125.04  
123.58

77.32  
77.00  
76.68  
68.99  
54.13  
52.19  
52.15

21.57

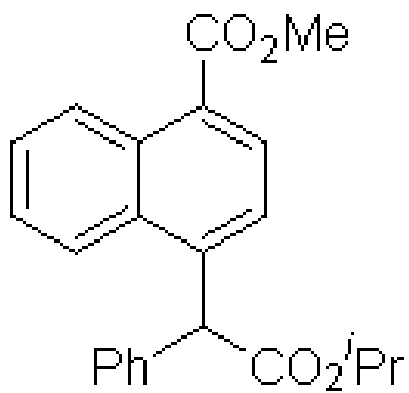

**8d**

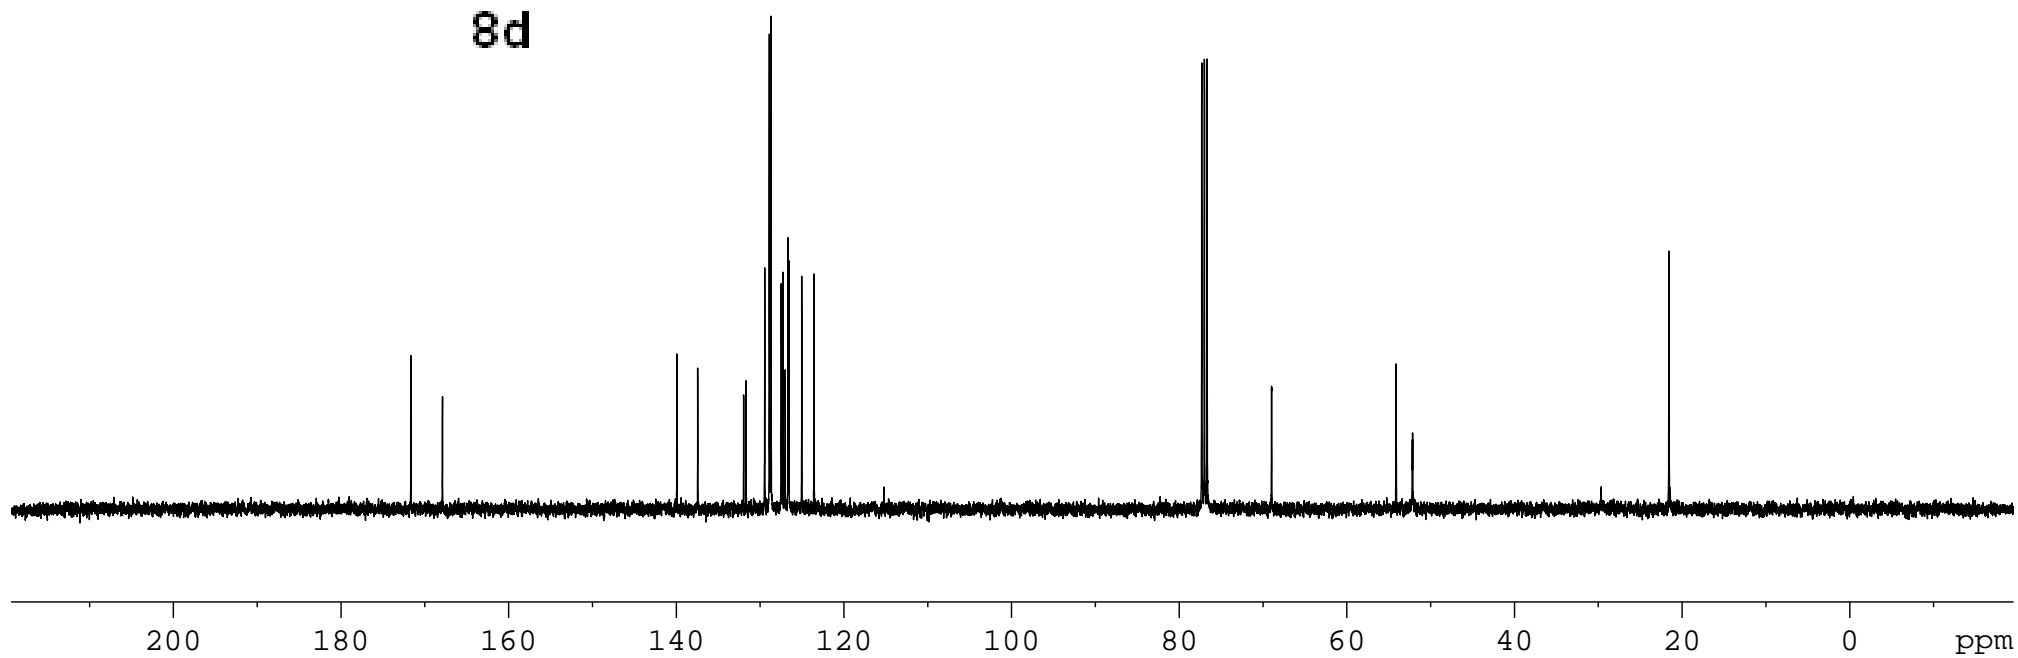



YZZ-15-093-1

8.310  
8.306  
8.299  
8.295  
8.292  
8.286  
7.948  
7.943  
7.935  
7.925  
7.538  
7.533  
7.524  
7.513  
7.510  
7.368  
7.366  
7.352  
7.346  
7.328  
7.306  
6.001  
5.628  
5.169  
5.154  
5.138  
5.122  
5.107

1.269  
1.254  
1.230  
1.215

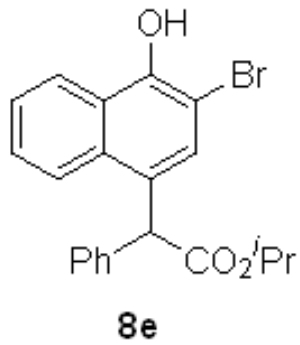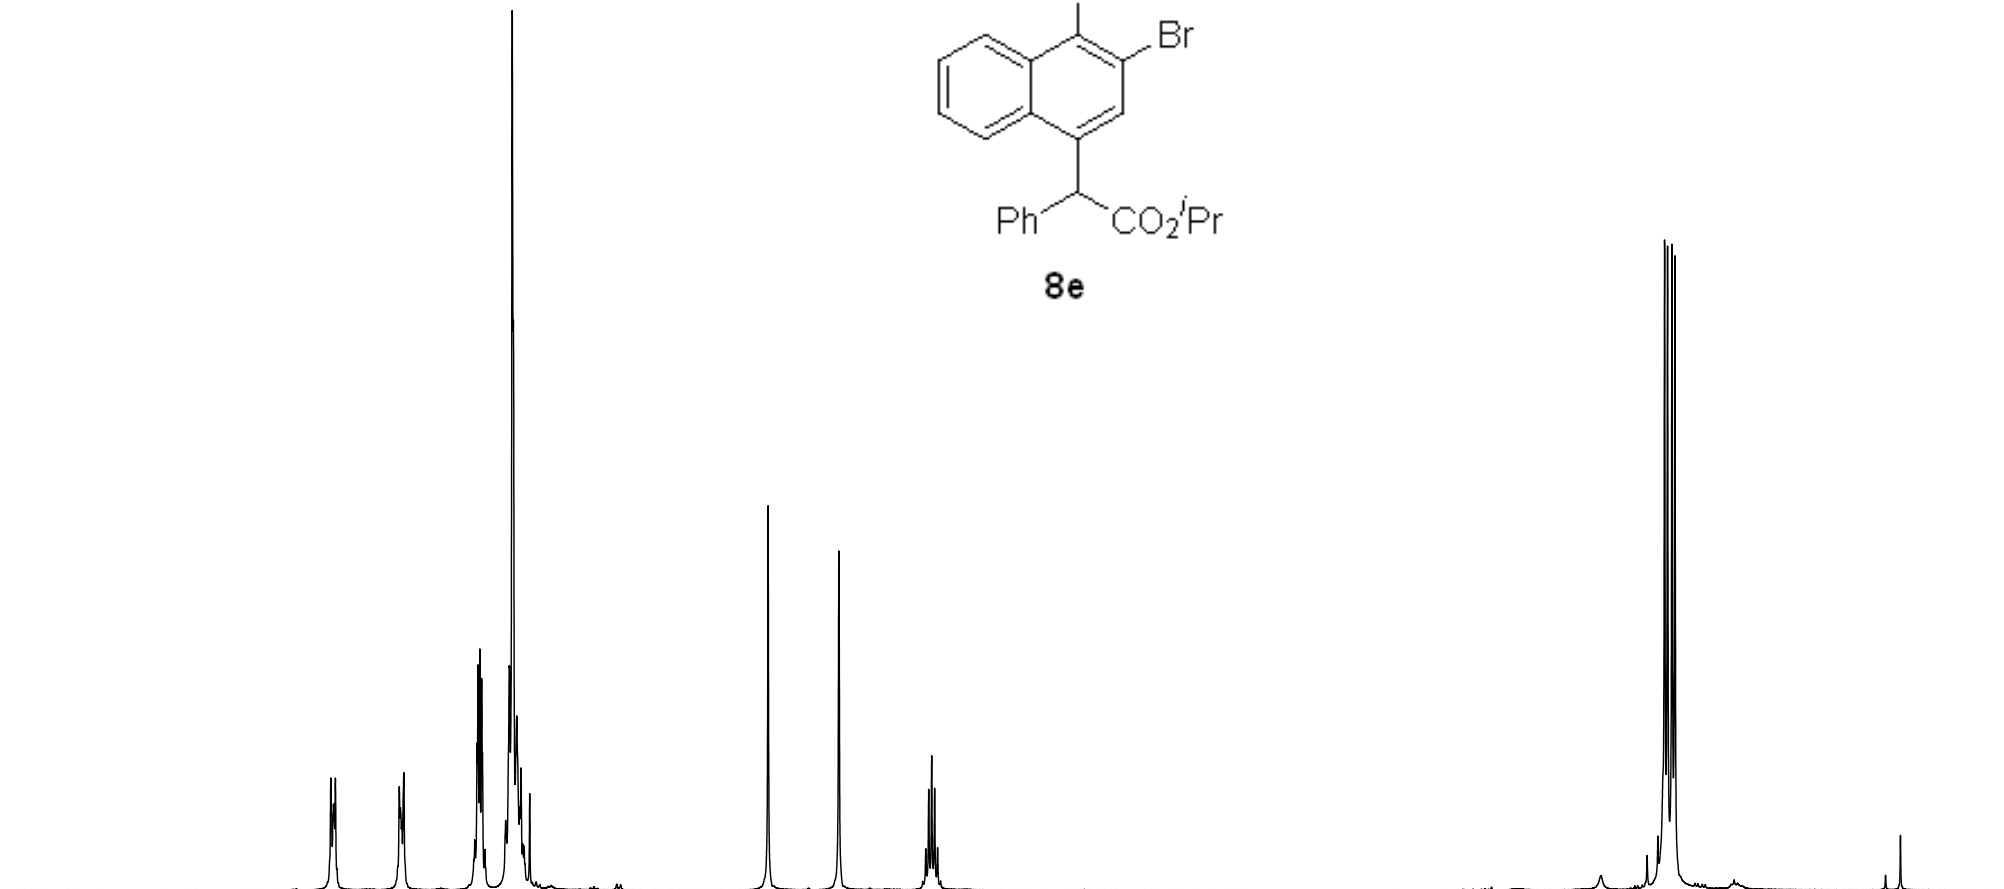

1.04

1.03

2.03

6.10

1.00

1.02

1.04

3.06

3.03

9

8

7

6

5

4

3

2

1

0 ppm

yzz-15-093-1

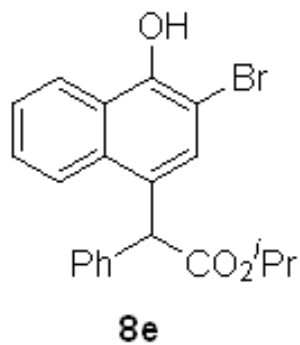

171.99  
147.88  
137.60  
131.90  
128.83  
128.72  
128.49  
127.46  
127.22  
125.94  
124.80  
123.34  
123.12  
103.55  
77.32  
77.00  
76.68  
68.90  
53.16  
21.62  
21.60

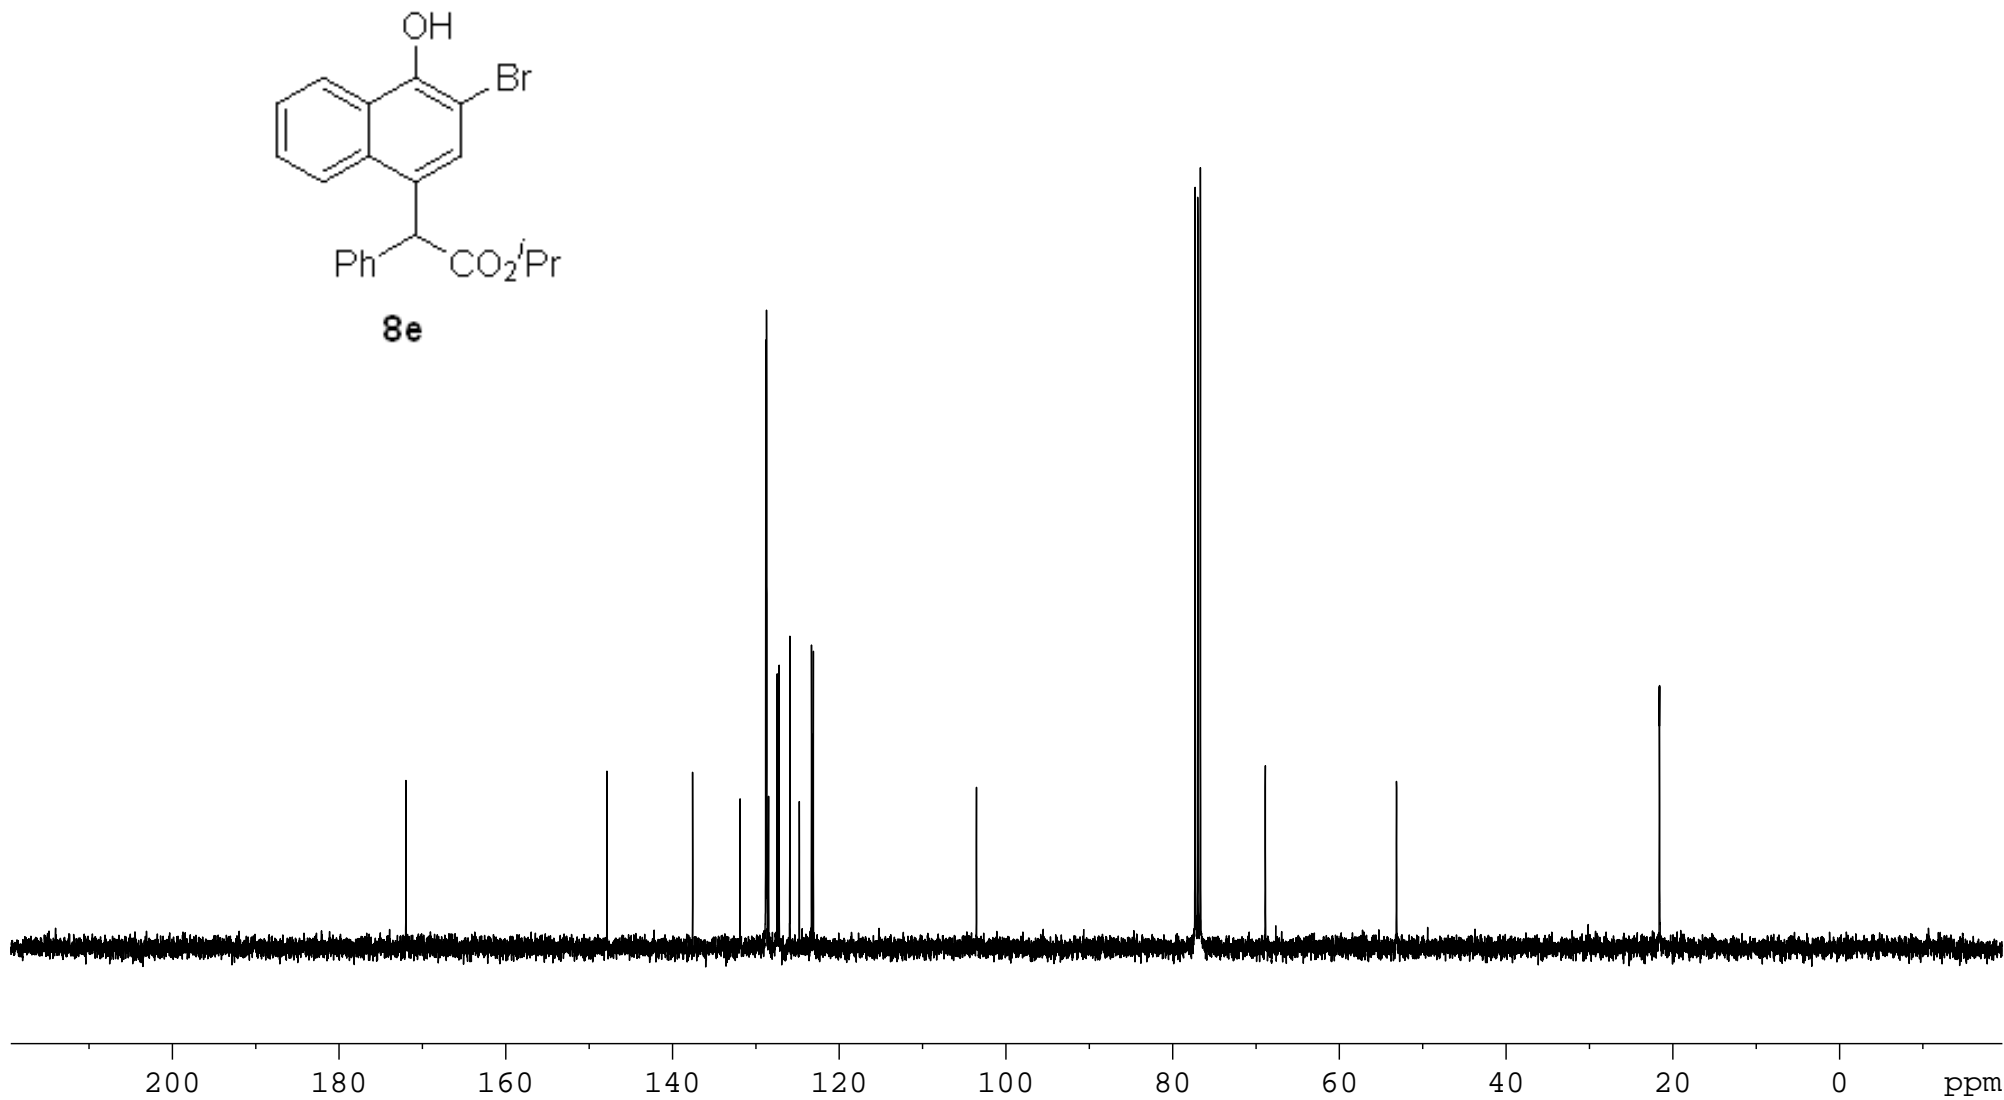

8.941  
8.291  
8.282  
8.273  
8.267  
8.086  
8.081  
8.070  
8.064  
7.417  
7.409  
7.392  
7.373  
7.348  
7.330  
7.259  
7.241  
7.221  
7.156  
7.138  
7.119  
6.937  
6.917  
4.902  
4.884  
4.867  
4.256  
4.243  
4.229  
4.212  
4.198  
4.183  
4.170  
4.165  
4.156  
4.138  
3.836  
3.822  
3.808  
2.942  
  
2.055  
2.050  
2.045

yzz-15-105-2

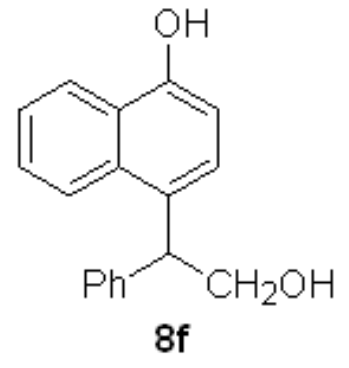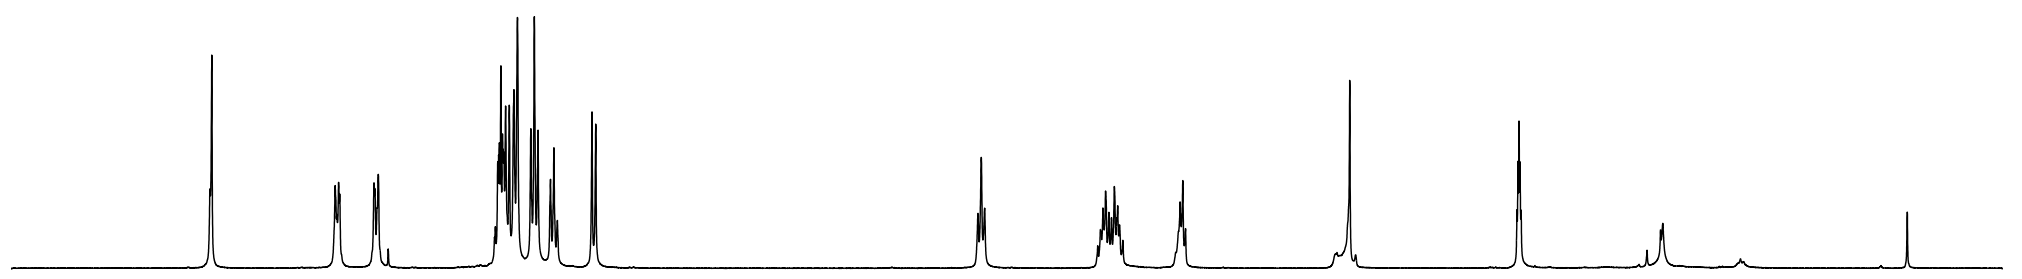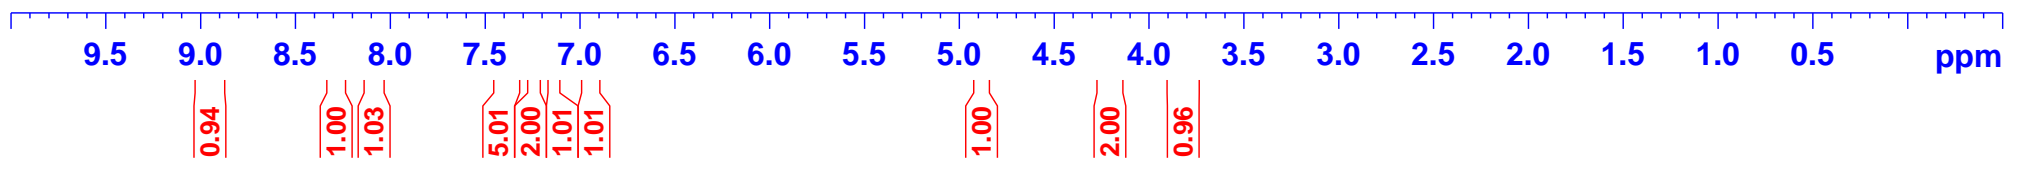

yzz-15-105-1-c

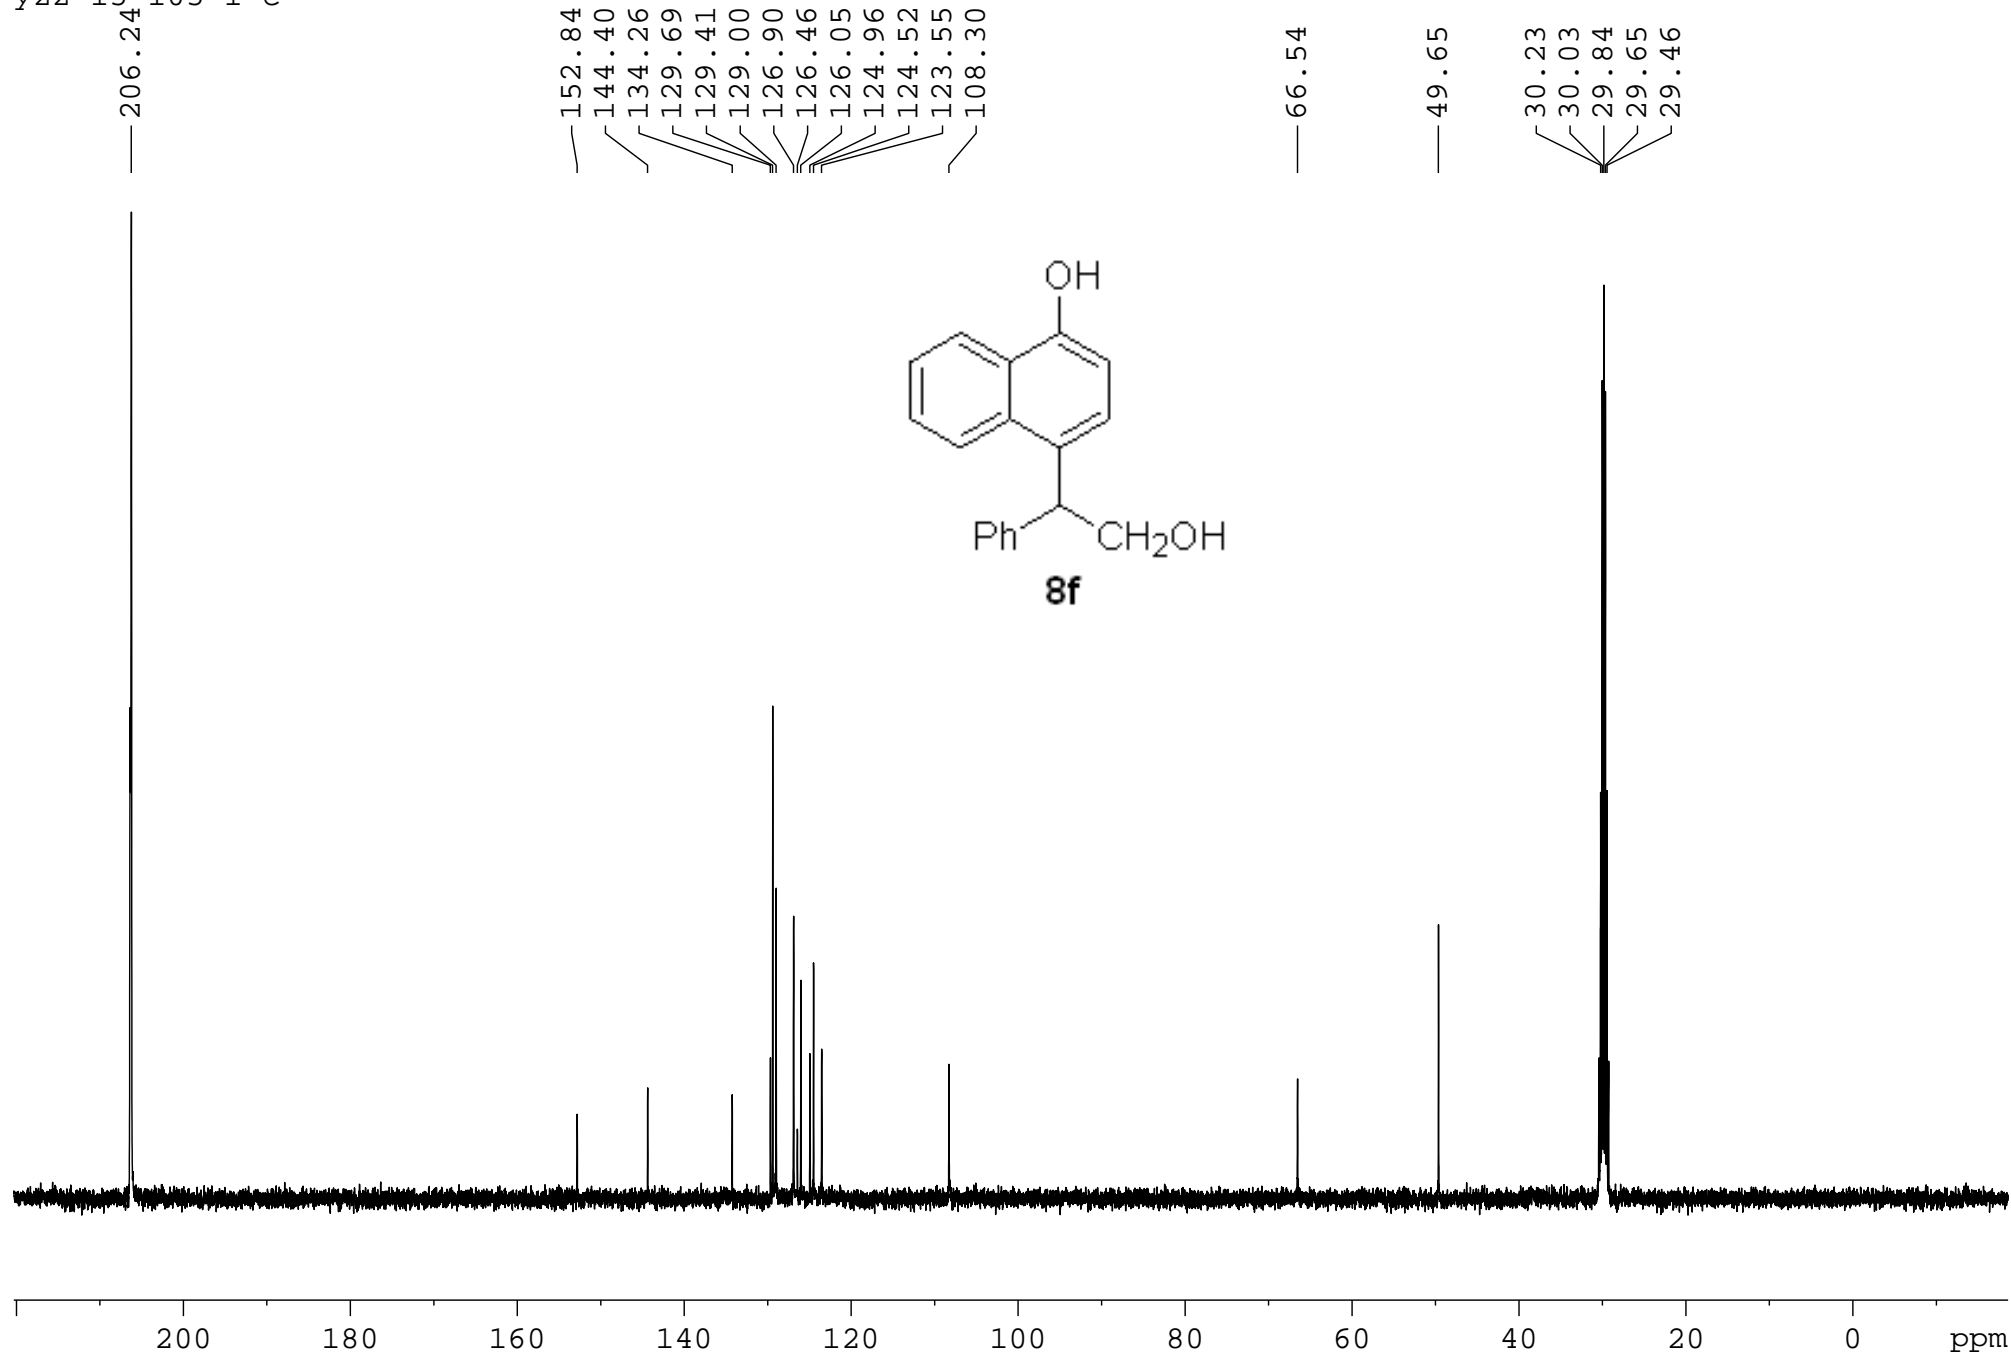

YZZ-15-010-1

8.006  
7.986  
7.814  
7.794  
7.594  
7.573  
7.525  
7.510  
7.490  
7.468  
7.452  
7.295  
7.289  
7.274  
7.255  
7.239  
7.200  
7.179  
7.169  
7.165  
7.150

— 4.962

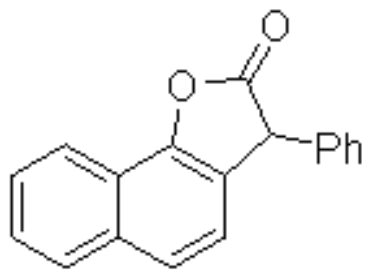

9

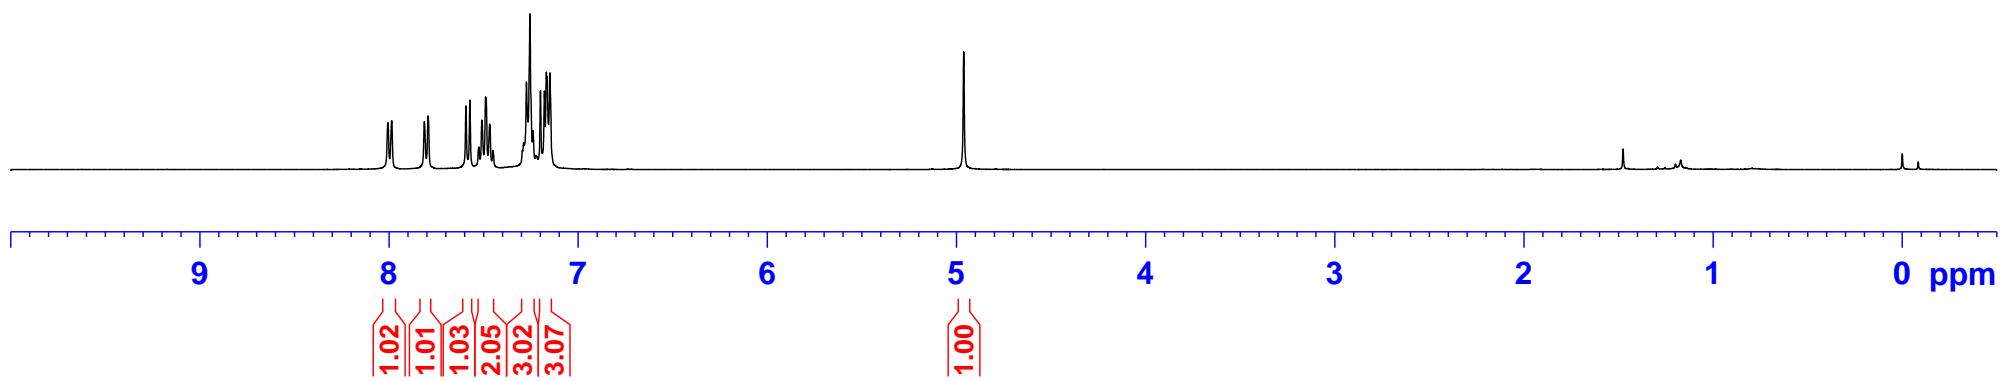

YZZ-15-010-1-C

— 175.58

149.58  
135.05  
134.14  
129.13  
128.31  
128.24  
128.21  
126.93  
124.40  
121.54  
121.17  
119.79

77.32  
77.00  
76.68

— 50.73

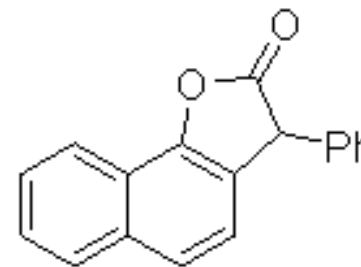

**9**

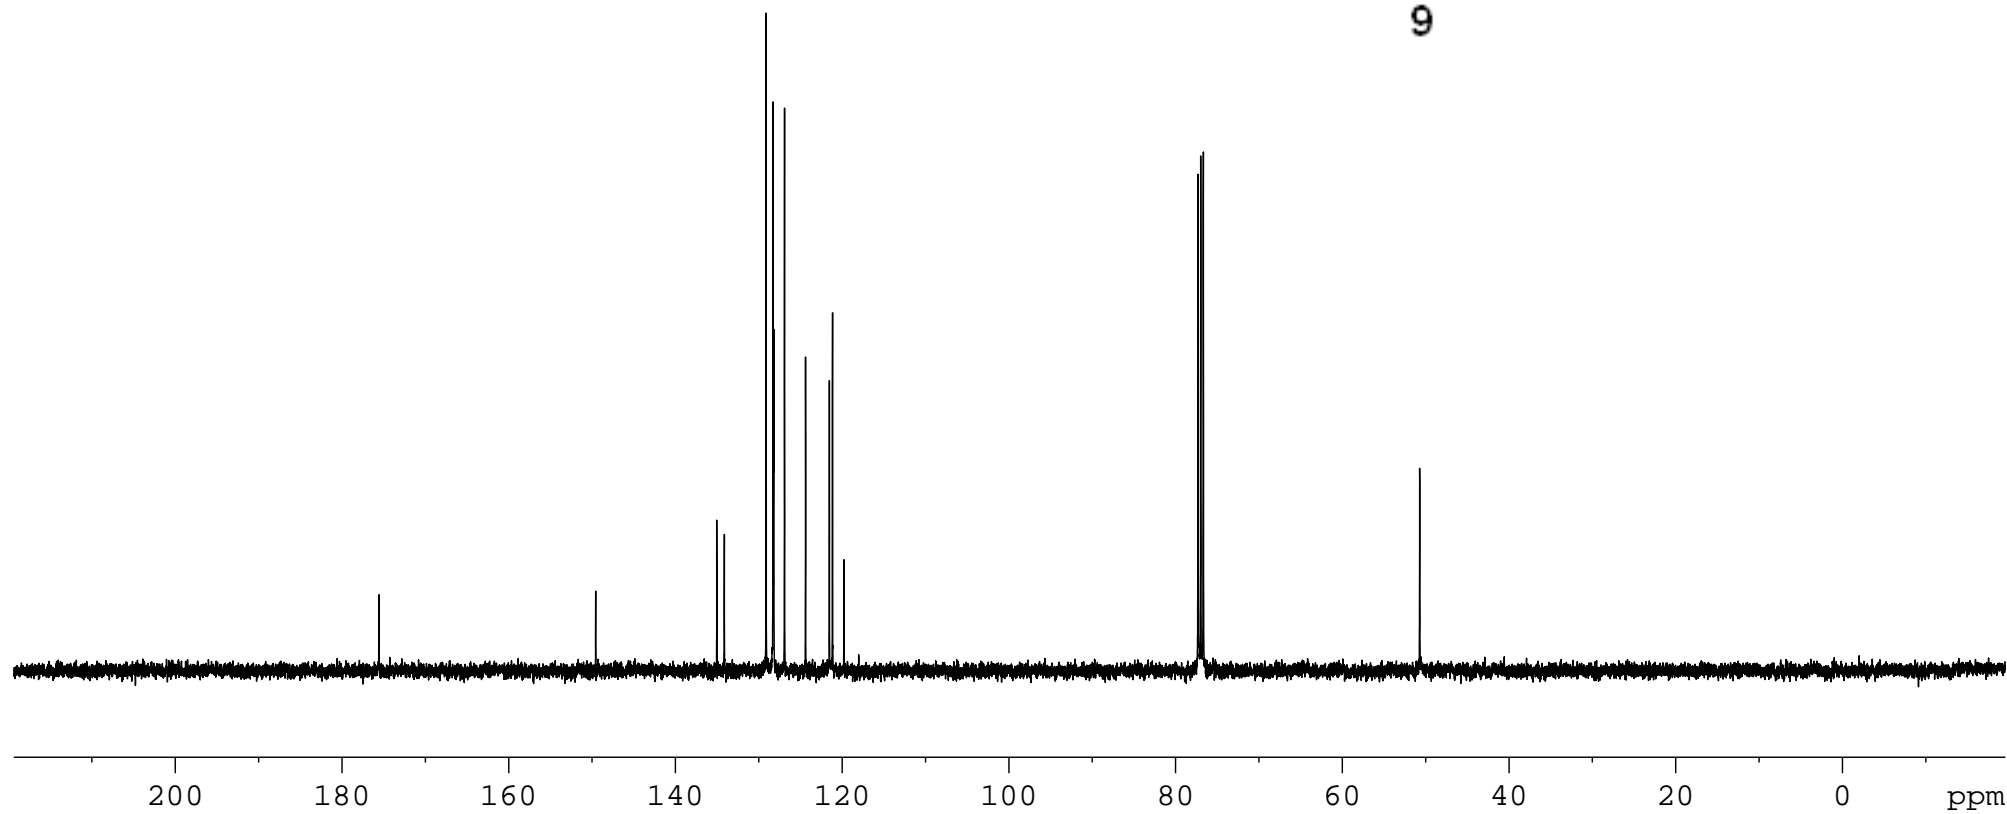

yzz-16-051-1

8.321  
8.302  
8.298  
7.939  
7.920  
7.485  
7.482  
7.466  
7.449  
7.446  
7.322  
7.311  
7.271  
7.261  
7.245  
7.225  
6.751  
6.730  
5.636  
5.137  
5.121  
5.105  
5.090  
5.074

3.962

1.228  
1.211  
1.194

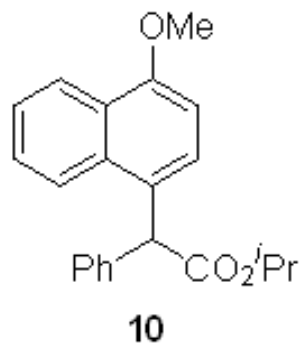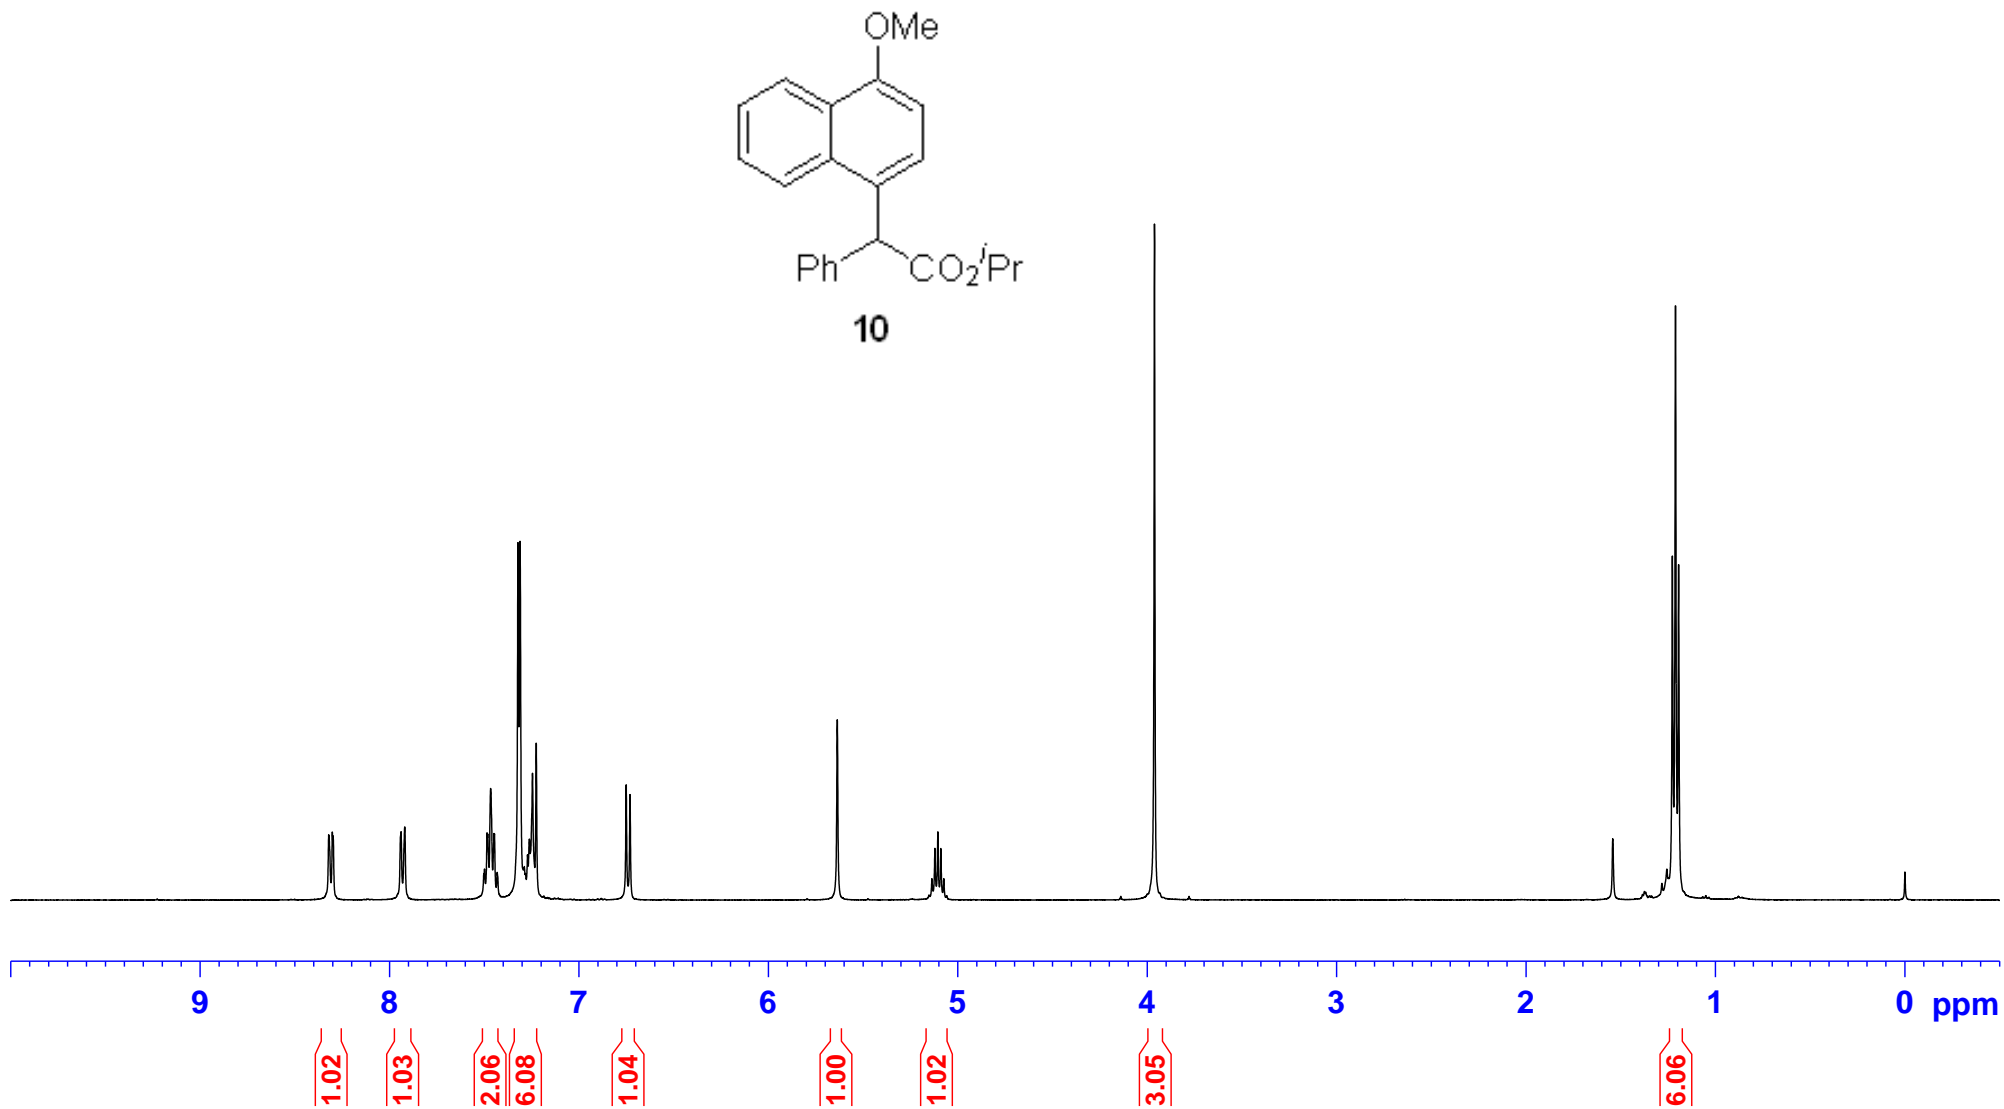

yzz-16-051-1-c

— 172.52  
— 154.98  
138.49  
132.54  
128.91  
128.50  
127.12  
126.81  
126.31  
126.03  
124.94  
123.08  
122.70  
— 103.15  
77.32  
77.00  
76.68  
— 68.56  
55.44  
55.41  
53.43  
— 21.66

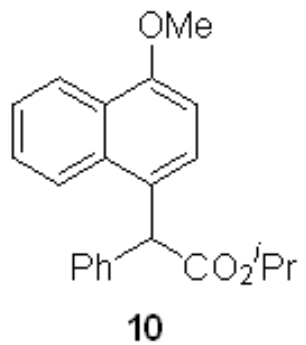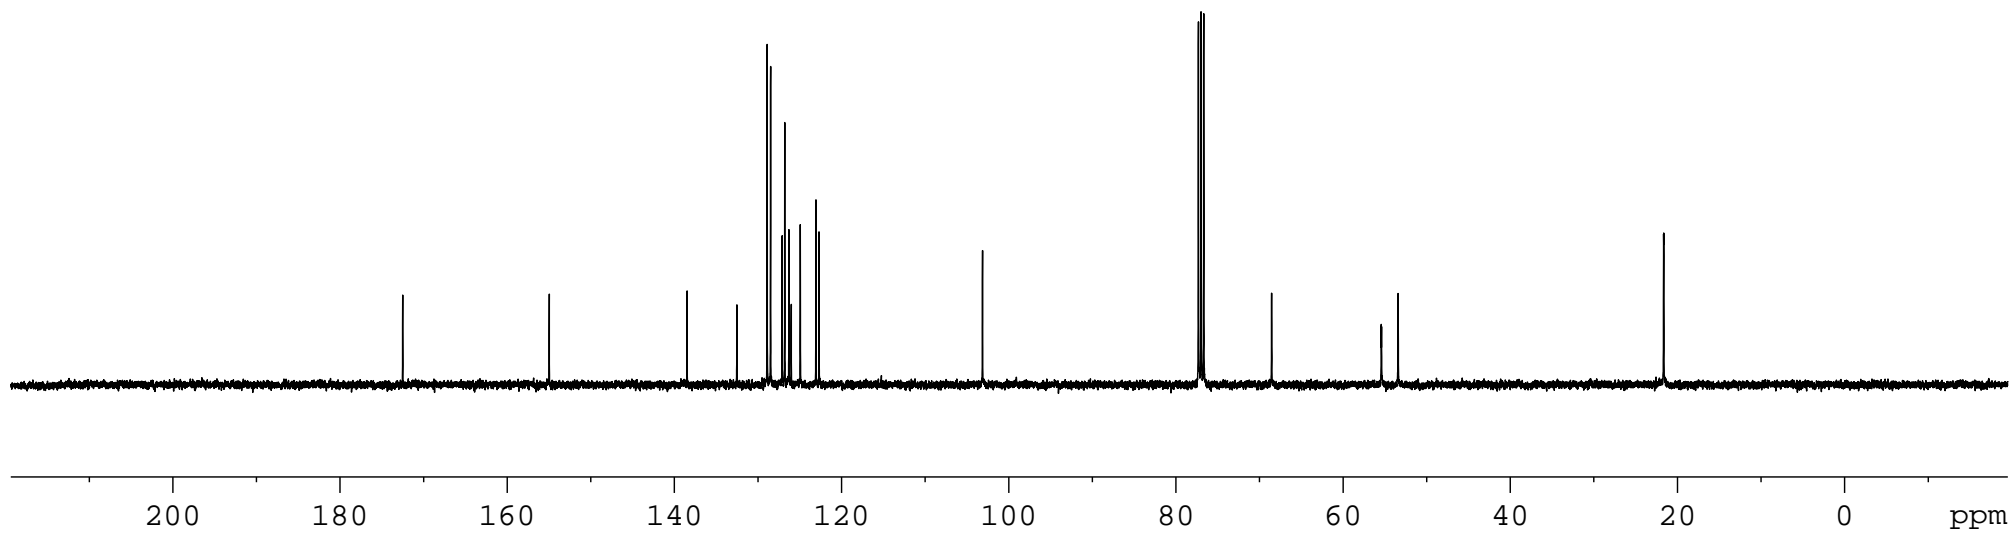



8.235  
8.215  
8.212  
7.962  
7.941  
7.501  
7.498  
7.481  
7.476  
7.456  
7.439  
7.348  
7.337  
7.292  
7.281  
7.259  
7.068  
7.059  
7.048  
7.040  
6.551  
6.531  
5.978  
5.669  
5.180  
5.164  
5.149  
5.133  
5.117

1.266  
1.250  
1.242  
1.226

yzz-16-033-1

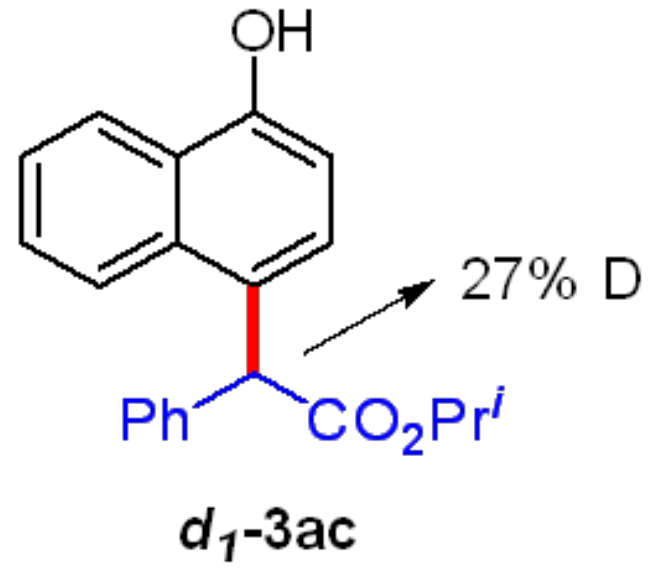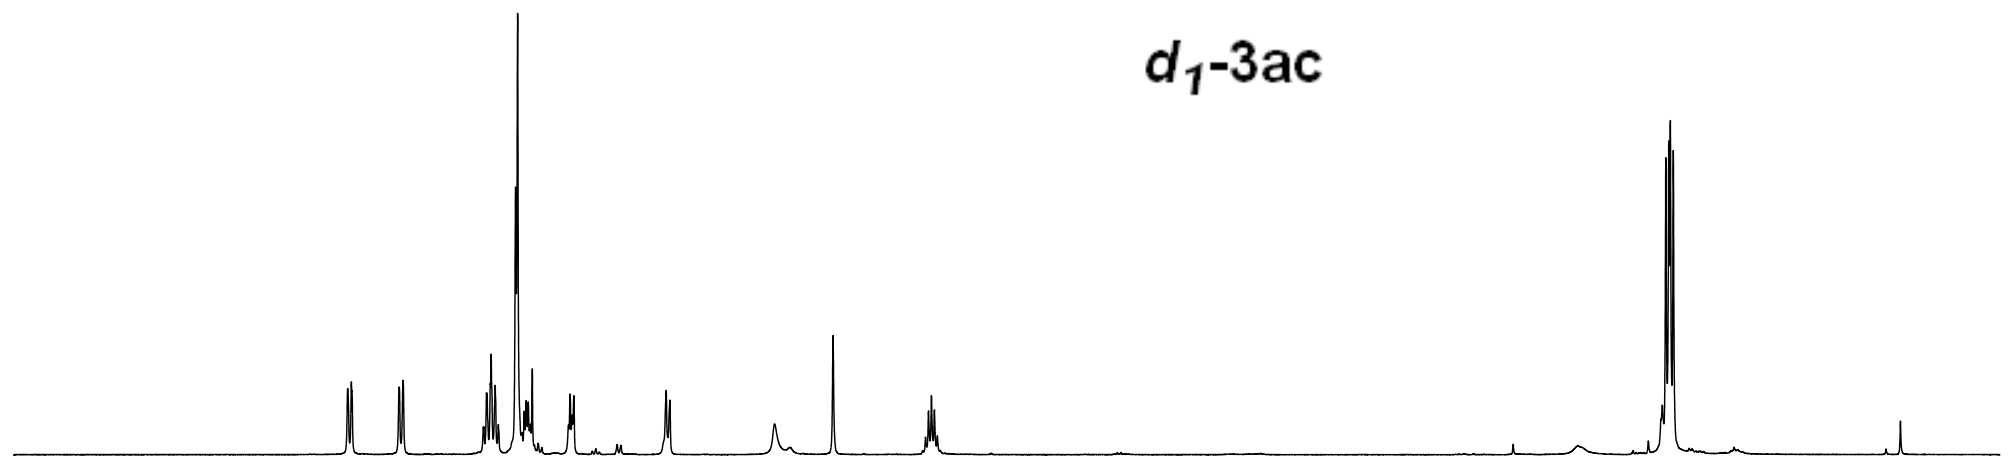

9 8 7 6 5 4 3 2 1 0 ppm

1.01 1.00 2.06 5.01 1.00 0.95 0.96 0.73 1.00 3.05 3.06

9.216  
9.191  
8.342  
8.329  
8.319  
7.778  
7.767  
7.755  
7.479  
7.475  
7.468  
7.456  
7.402  
7.381  
7.303  
7.282  
7.268  
7.250  
7.232  
7.224  
7.203

5.202  
5.186  
5.170  
5.155  
5.139  
5.121

1.364  
1.348  
1.285  
1.270

yzz-16-034-1

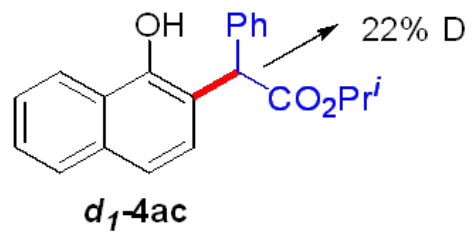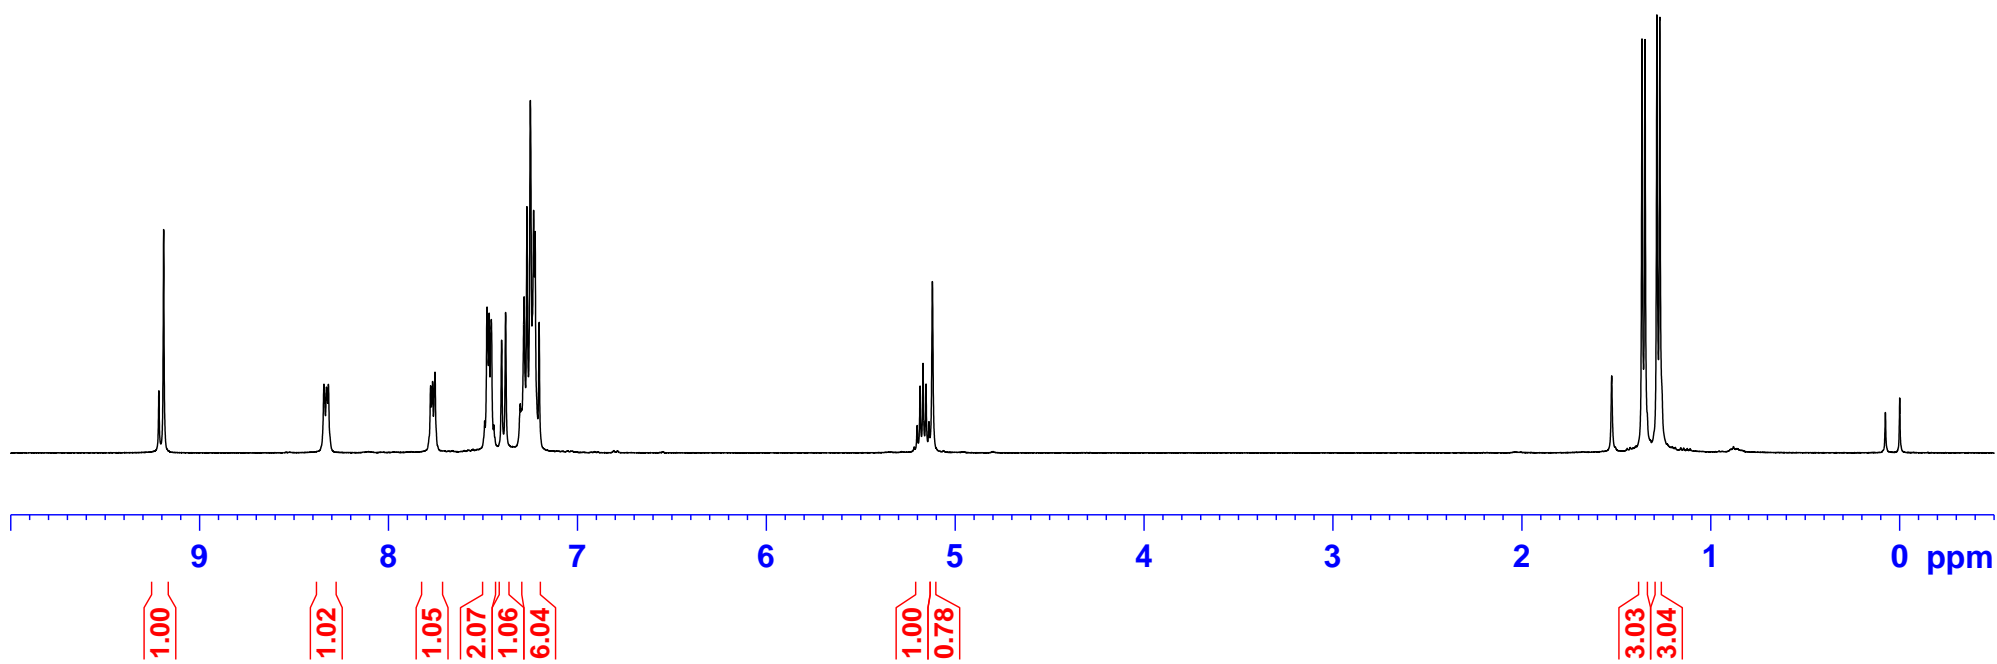

8.729  
8.036  
8.015  
7.829  
7.809  
7.784  
7.762  
7.523  
7.505  
7.485  
7.376  
7.358  
7.339  
7.292  
7.275  
7.256  
7.246  
7.231  
7.210  
7.188  
7.169  
5.969  
5.211  
5.195  
5.180  
5.164  
5.148

1.393  
1.377  
1.229  
1.213

yzz-16-045-1

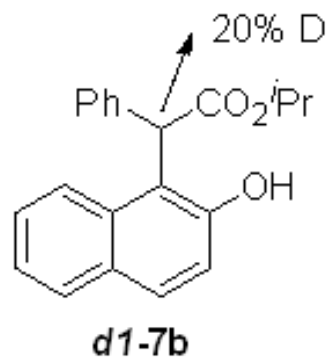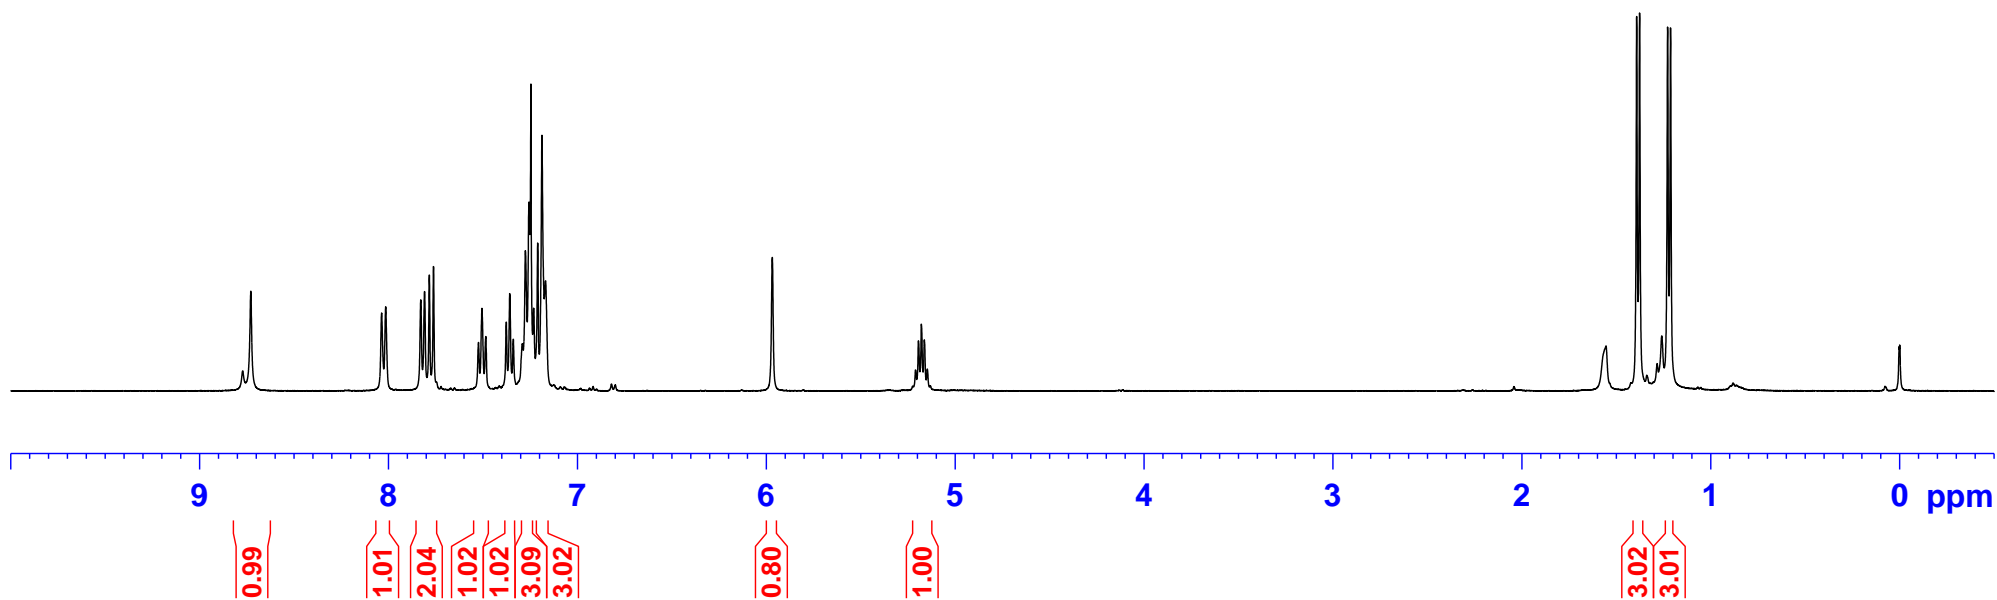

Supplement: SC-010-C9SC01657K-s001.pdf [file SC-010-C9SC01657K-s001.pdf]
